# Supplementary material for: Gene Expression Profiling of Lacrimal Glands Identifies the Ectopic Expression of MHC II on Glandular Cells as a Presymptomatic Feature in a Mouse Model of Primary Sjögren's Syndrome
Source: Front Immunol. 2018 Oct 31;9:2362. doi: 10.3389/fimmu.2018.02362 (PMC6220427; doi:10.3389/fimmu.2018.02362)
Supplement: Supplementary file 1 [file Table_1.xlsx]

## Sheet: Worksheet legend
Worksheet	Description
Ro60_316-335 vs untreated	Differentially expressed genes (DEGs) in the lacrimal glands of Ro60_316-335 immunized mice compared to untreated mice at 6 weeks after immunization
Ro60_316-335 vs PBS control	Differentially expressed genes (DEGs) in the lacrimal glands of Ro60_316-335 immunized mice compared to PBS control immunized mice at 6 weeks after immunization
PBS control vs untreated	Differentially expressed genes (DEGs) in the lacrimal glands of PBS control immunized mice compared to untreated mice at 6 weeks after immunization

## Sheet: Column legend
Column	Description
SEQ_ID	It represents probe name.
P-value	P-value calculated from t-test.
FDR	FDR (False Discovery Rate) calculated from Benjamini Hochberg FDR.
FCAbsolute	The absolute ratio (no log scale) of normalized intensities between two conditions.
Regulation	It depicts which group has greater or lower intensity values wrt other group.
Annotations	Include ACCESSION, GENE_NAME, SYNONYM, DESCRIPTION, GENE_ID, CHROMOSOME, START, STOP, GO biological process, GO cellular component, GO molecular function, UniGene, TIGRID, EnsemblID.
Group--Normalized Intensity	Normalized Intensity of each group (averaged normalized intensities of replicate samples).
Individual Normalized Intensity	Normalized Intensity of each sample.

## Sheet: Ro60_316-335 vs untreated
	P-value		Fold change and Regulation		Annotations														Group--Normalized Intensity		Individual Normalized Intensity
SEQ_ID	p-value	FDR	FCAbsolute	regulation	ACCESSION	GENE_NAME	SYNONYM	DESCRIPTION	GENE_ID	CHROMOSOME	START	STOP	GO biological process	GO cellular component	GO molecular function	UniGene	TIGRID	EnsemblID	Ro60_316-335	untreated	Ro60_316-335 1	Ro60_316-335 2	Ro60_316-335 3	untreated 1	untreated 2	untreated 3
AB037668	0.0217192	0.352113	2.75079	up	AB037668	Rapgef4	1300003D15Rik,5730402K07Rik,6330581N18Rik,Epac2,KIAA4040,mKIAA4040	Mus musculus Epac2 mRNA for cAMP-GEFII, partial cds.	56508	chr2	72017749	72046221	GO:0006468(protein amino acid phosphorylation);GO:0006887(exocytosis);GO:0007165(signal transduction);GO:0007242(intracellular signaling cascade);GO:0007264(small GTPase mediated signal transduction);GO:0017156(calcium ion-dependent exocytosis);GO:0017157(regulation of exocytosis);GO:0019933(cAMP-mediated signaling);GO:0030073(insulin secretion);GO:0051056(regulation of small GTPase mediated sign…	GO:0005622(intracellular);GO:0005829(cytosol);GO:0005952(cAMP-dependent protein kinase complex)	GO:0000166(nucleotide binding);GO:0005085(guanyl-nucleotide exchange factor activity);GO:0005515(protein binding);GO:0008603(cAMP-dependent protein kinase regulator activity);GO:0030552(cAMP binding)	Mm.196153	TC1590797///NP378497	ENSMUST00000102698	297.694	111.316	250.687	397.913	244.482	89.3217	79.3788	165.247
AB093248	0.0191665	0.345803	2.7881	up	AB093248	Greb1	5730583K22Rik,9130004E13,AF180470,AU023194,mKIAA0575	Mus musculus mRNA for mKIAA0575 protein.	268527	chr12	16684493	16713094	GO:0006118(electron transport)			Mm.436595	TC1581455	ENSMUST00000052262	110.576	38.4878	85.6706	164.158	81.9009	50.6716	33.2306	31.5611
AB093284	0.00219471	0.226282	2.43863	up	AB093284	Zmynd8	1110013E22Rik,2010005I16Rik,3632413B07Rik,AI316811,AL024039,MGC25852,Prkcbp1,RACK7,mKIAA1125	Mus musculus mRNA for mKIAA1125 protein.	228880	chr2	165609653	165703068			GO:0005515(protein binding);GO:0008270(zinc ion binding);GO:0016301(kinase activity)	Mm.227598///Mm.393102	TC1669649///TC1582373///TC1715711///TC1771024	ENSMUST00000018050///ENSMUST00000099084///ENSMUST00000099083	916.587	371.56	1018.51	1018.6	712.651	343.169	370.008	401.503
AF065902	0.0103366	0.293633	6.60367	up	AF065902	Itgal	Cd11a,LFA-1,Ly-15,Ly-21	Mus musculus strain DBA/2J integrin alpha L (Itgal) mRNA, complete cds.	16408	chr7	134439861	134477412	GO:0007155(cell adhesion);GO:0007159(leukocyte adhesion);GO:0007229(integrin-mediated signaling pathway);GO:0050798(activated T cell proliferation)	GO:0001772(immunological synapse);GO:0005886(plasma membrane);GO:0008305(integrin complex);GO:0016020(membrane);GO:0016021(integral to membrane)	GO:0000287(magnesium ion binding);GO:0004872(receptor activity);GO:0005509(calcium ion binding);GO:0005515(protein binding)	Mm.1618	TC1629001///TC1581814	ENSMUST00000033117	227.176	35.0397	122.28	246.327	312.92	31.025	54.8663	19.2277
AF143955	0.00259799	0.230251	4.82804	up	AF143955	Coro1a	Clabp,Lmb3,TACO,p57	Mus musculus coronin-1 mRNA, complete cds.	12721	chr7	133843287	133847603			GO:0003779(actin binding)	Mm.290482	TC1695543///TC1573127	ENSMUST00000032949	452.715	91.3778	289.632	507.468	561.046	113.079	82.728	78.3265
AF334736	0.0395356	0.405848	2.21268	up	AF334736	Gfpt1	2810423A18Rik,AI324119,AI449986,GFA,GFAT,GFAT1,GFAT1m,Gfpt	Mus musculus glutamine: fructose-6-phosphate amidotransferase 1 muscle isoform GFAT1M mRNA, complete cds.	14583	chr6	86992843	87038365	GO:0005975(carbohydrate metabolic process);GO:0006541(glutamine metabolic process);GO:0006810(transport);GO:0008152(metabolic process);GO:0016051(carbohydrate biosynthetic process)	GO:0005737(cytoplasm)	GO:0004360(glutamine-fructose-6-phosphate transaminase (isomerizing) activity);GO:0005215(transporter activity);GO:0005529(sugar binding);GO:0008483(transaminase activity);GO:0016740(transferase activity)	Mm.391492	TC1581157	ENSMUST00000060927	459.116	197.482	359.698	322.261	695.391	213.061	222.247	157.136
AF408435	0.0154727	0.331342	3.34962	up	AF408435	Prc1	D7Ertd348e,MGC6745	Mus musculus protein regulator of cytokinesis 1-like protein mRNA, partial cds.	233406	chr7	87454278	87461086	GO:0000910(cytokinesis);GO:0007049(cell cycle);GO:0051301(cell division)	GO:0005634(nucleus);GO:0005819(spindle);GO:0005874(microtubule)		Mm.227274	TC1601601		101.156	28.5974	57.787	98.9175	146.763	21.9973	33.5389	30.2561
AK002615	0.00886604	0.280696	2.23197	up	AK002615	Wdr27	0610012K18Rik	Mus musculus adult male kidney cDNA, RIKEN full-length enriched library, clone:0610012K18 product:unclassifiable, full insert sequence.	71682	chr17	15074847	15080129				Mm.432548	TC1594257	ENSMUST00000060103	56.6296	25.1217	72.3362	52.053	45.4996	29.7967	21.3635	24.2049
AK002779	0.029765	0.378723	2.25926	up	AK002779	0610037M15Rik	-	Mus musculus adult male kidney cDNA, RIKEN full-length enriched library, clone:0610037M15 product:unclassifiable, full insert sequence.	68395	chr17	35378749	35566998							628.962	271.795	876.09	433.69	577.105	303.082	309.787	202.517
AK002830	0.0396205	0.406093	2.02513	up	AK002830	Irf7	-	Mus musculus adult male kidney cDNA, RIKEN full-length enriched library, clone:0610039E12 product:interferon regulatory factor 7, full insert sequence.	54123	chr7	148449087	148452300	GO:0006350(transcription);GO:0006355(regulation of transcription, DNA-dependent);GO:0006955(immune response);GO:0009615(response to virus);GO:0016064(immunoglobulin mediated immune response);GO:0045351(interferon type I biosynthetic process)	GO:0005622(intracellular);GO:0005634(nucleus)	GO:0003677(DNA binding);GO:0003700(transcription factor activity);GO:0005515(protein binding)	Mm.3233	TC1772855	ENSMUST00000026571	200.923	101.411	252.291	173.303	177.176	65.438	117.937	120.858
AK003081	0.0176243	0.342718	2.17072	up	AK003081	Lsp1	Lsp-1,WP34,p50,pp52	Mus musculus adult male spleen cDNA, RIKEN full-length enriched library, clone:0910001J21 product:LYMPHOCYTE-SPECIFIC PROTEINS LSP1 AND S37 (PP52 PROTEIN) (52 KDA PHOSPHOPROTEIN) (LYMPHOCYTE-SPECIFIC ANTIGEN WP34) (S37 PROTEIN) homolog [Mus musculus], full insert sequence.	16985	chr7	149646761	149680504	GO:0006915(apoptosis);GO:0006935(chemotaxis);GO:0006936(muscle contraction);GO:0006952(defense response);GO:0007010(cytoskeleton organization and biogenesis);GO:0007165(signal transduction)		GO:0003779(actin binding);GO:0004871(signal transducer activity);GO:0005516(calmodulin binding);GO:0017022(myosin binding)	Mm.234003	TC1594075	ENSMUST00000038946	577.542	263.317	592.082	721.018	419.526	204.061	296.326	289.566
AK004655	0.0132317	0.31641	4.06683	up	AK004655	Cep55	1200008O12Rik,2700032M20Rik	Mus musculus adult male lung cDNA, RIKEN full-length enriched library, clone:1200008O12 product:hypothetical protein, full insert sequence.	74107	chr19	38129578	38148911	GO:0007049(cell cycle);GO:0007067(mitosis);GO:0051301(cell division)			Mm.9916	TC1590265///TC1629103	ENSMUST00000096096	109.485	25.7936	59.0456	151.636	117.773	18.9056	24.1773	34.2978
AK004706	0.0136855	0.321019	4.32996	up	AK004706	Mdga1	1200011I03Rik,GPIM	Mus musculus adult male lung cDNA, RIKEN full-length enriched library, clone:1200011I03 product:hypothetical MAM domain containing protein, full insert sequence.	74762	chr17	29964902	29979366	GO:0008150(biological_process);GO:0009399(nitrogen fixation)	GO:0016020(membrane);GO:0045121(lipid raft)	GO:0003674(molecular_function);GO:0016163(nitrogenase activity)	Mm.40901	TC1601802		149.801	34.9886	213.061	96.853	139.488	40.9747	44.5805	19.4107
AK005539	0.0287873	0.376175	2.84431	up	AK005539	1600025M17Rik	Gm394	Mus musculus adult female placenta cDNA, RIKEN full-length enriched library, clone:1600025M17 product:unclassifiable, full insert sequence.	72030	chrX	53570830	53573841	GO:0006355(regulation of transcription, DNA-dependent)	GO:0005634(nucleus)	GO:0003700(transcription factor activity)	Mm.426148	TC1645678		122.705	40.2551	62.9473	142.644	162.522	44.4515	43.5665	32.7472
AK006160	0.0483876	0.427325	2.81587	up	AK006160	1700020G17Rik	4930480D05Rik	Mus musculus adult male testis cDNA, RIKEN full-length enriched library, clone:1700020G17 product:unclassifiable, full insert sequence.	75630	chr10	110249864	110333606				Mm.392786	TC1695497		125.437	43.5616	65.3809	151.807	159.124	40.9747	61.7563	27.9538
AK007638	0.0116245	0.302789	3.72804	up	AK007638	Cd209f	1810029C22Rik,AI647041,SIGNR8	Mus musculus 10 day old male pancreas cDNA, RIKEN full-length enriched library, clone:1810029C22 product:weakly similar to DC-SIGN [Mus musculus], full insert sequence.	69142	chr8	4102786	4105764	GO:0008150(biological_process)	GO:0016021(integral to membrane)	GO:0005529(sugar binding);GO:0005537(mannose binding)	Mm.171061	TC1625415///TC1672378	ENSMUST00000078702	141.573	38.8551	101.914	192.456	130.348	27.0524	31.3716	58.1414
AK007812	0.00565072	0.261601	2.14734	up	AK007812	Cinp	1810047K05Rik,2810452K22Rik	Mus musculus 10 day old male pancreas cDNA, RIKEN full-length enriched library, clone:1810047K05 product:similar to FROM HELA CYCLIN-DEPENDENT KINASE 2 INTERACTING PROTEIN (CDNA FLJ31550 FIS, CLONE NT2RI2001054, HIGHLY SIMILAR TO HOMO SAPIENS FROM HELA CYCLIN-DEPENDENT KINASE 2 INTERACTING PROTEIN (CINP) MRNA) [Homo sapiens], full insert sequence.	67236	chr12	112115804	112127324			GO:0016301(kinase activity)	Mm.287157	TC1595579///TC1779232///TC1593255	ENSMUST00000021705///ENSMUST00000043716	103.315	47.5412	91.1939	130.48	88.2705	42.4666	46.9244	53.2326
AK007826	0.0080889	0.279466	2.09091	up	AK007826	N/A	N/A	Mus musculus 10 day old male pancreas cDNA, RIKEN full-length enriched library, clone:1810048H17 product:similar to Ig heavy chain precursor [Mus musculus], full insert sequence.	N/A	chr12	114496926	114667344							98.2978	46.2159	89.2219	126.418	79.2533	51.3266	44.6608	42.6603
AK008273	0.0303471	0.382352	2.9543	up	AK008273	Arhgdib	D4,Gdid4,Ly-GDI	Mus musculus adult male small intestine cDNA, RIKEN full-length enriched library, clone:2010016E13 product:rho, GDP dissociation inhibitor (GDI) beta, full insert sequence.	11857	chr6	136872229	136889989		GO:0005737(cytoplasm)	GO:0005094(Rho GDP-dissociation inhibitor activity);GO:0005096(GTPase activator activity);GO:0005515(protein binding)	Mm.2241	TC1578001	ENSMUST00000032344	832.784	257.562	1329.35	446.854	722.15	282.755	210.754	279.178
AK008341	0.0118357	0.304469	2.18276	up	AK008341	2010107H07Rik	Snhg8	Mus musculus adult male small intestine cDNA, RIKEN full-length enriched library, clone:2010107H07 product:hypothetical Ribosomal protein S14 containing protein, full insert sequence.	66487	chr14	31937846	31942116	GO:0006412(translation)	GO:0005622(intracellular);GO:0005840(ribosome)	GO:0003735(structural constituent of ribosome)	Mm.379116	TC1725429	ENSMUST00000049732	1160.54	540.012	1106.79	1358.25	1016.59	589.705	387.872	642.46
AK008694	0.0128111	0.31288	2.2332	up	AK008694	2210012G02Rik	2210010B22Rik,6330404A07Rik,AU015593	Mus musculus adult male stomach cDNA, RIKEN full-length enriched library, clone:2210010B22 product:CDNA FLJ32112 FIS, CLONE OCBBF2001586, WEAKLY SIMILAR TO TRANSCRIPTION ELONGATION FACTOR S-II homolog [Homo sapiens], full insert sequence.	66526	chr4	106845615	106850813			GO:0003746(translation elongation factor activity)	Mm.347940	TC1587514///TC1580839	ENSMUST00000030362	207.682	95.0899	223.78	221.403	177.863	109.15	110.543	65.5769
AK008921	0.00486396	0.253472	2.22429	up	AK008921	2210414B05Rik	-	Mus musculus adult male stomach cDNA, RIKEN full-length enriched library, clone:2210414B05 product:unclassifiable, full insert sequence.	70143	chr4	3583659	3590255							68.9098	31.1825	80.0726	65.2578	61.3989	34.8784	24.3713	34.2978
AK010004	0.00600315	0.26248	3.74028	up	AK010004	2310061J03Rik	-	Mus musculus adult male tongue cDNA, RIKEN full-length enriched library, clone:2310061J03 product:unclassifiable, full insert sequence.	66391	chr16	55973389	55974663				Mm.347938	TC1648222		192.082	50.3498	150.289	274.098	151.858	37.9484	63.4464	49.6547
AK013491	0.0364065	0.397873	4.36569	up	AK013491	Macrod2	1110033L15Rik,2610107G07Rik,2900006F19Rik,MGC100276	Mus musculus adult male hippocampus cDNA, RIKEN full-length enriched library, clone:2900006F19 product:unclassifiable, full insert sequence.	72899	chr2	140221165	140651608				Mm.229466	TC1596067///TC1590422	ENSMUST00000043836	101.405	20.1588	35.6234	152.725	115.866	22.0381	24.2792	14.1591
AK013585	0.00162239	0.205813	2.67363	up	AK013585	Fmn2	AU024104	Mus musculus adult male hippocampus cDNA, RIKEN full-length enriched library, clone:2900024F01 product:formin 2, full insert sequence.	54418	chr1	176542637	176630539	GO:0007275(multicellular organismal development);GO:0016043(cellular component organization and biogenesis);GO:0030036(actin cytoskeleton organization and biogenesis)	GO:0015629(actin cytoskeleton)	GO:0003779(actin binding)	Mm.330620	NP378597	ENSMUST00000085858///ENSMUST00000030039	92.4475	34.4828	74.9302	101.108	101.304	32.1249	40.3232	31.0004
AK014783	0.0489813	0.427659	2.80361	up	AK014783	Irak3	4833428C18Rik,AI563835,IRAK-M	Mus musculus 0 day neonate head cDNA, RIKEN full-length enriched library, clone:4833428C18 product:similar to interleukin-1 receptor-associated kinase 1, full insert sequence.	73914	chr10	119602031	119638593	GO:0006468(protein amino acid phosphorylation);GO:0006915(apoptosis);GO:0007165(signal transduction);GO:0019221(cytokine and chemokine mediated signaling pathway);GO:0042981(regulation of apoptosis);GO:0043244(regulation of protein complex disassembly)	GO:0005615(extracellular space)	GO:0000166(nucleotide binding);GO:0000287(magnesium ion binding);GO:0004672(protein kinase activity);GO:0004674(protein serine/threonine kinase activity);GO:0004872(receptor activity);GO:0005515(protein binding);GO:0005524(ATP binding);GO:0016301(kinase activity);GO:0016740(transferase activity);GO:0042802(identical protein binding)	Mm.146194	TC1581461	ENSMUST00000020448	138.05	45.9505	192.795	65.5557	155.801	42.9105	60.5499	34.391
AK015337	0.0422065	0.413266	2.3869	up	AK015337	Tgfbr1	ALK5,AU017191,Alk-5,TbetaR-I,TbetaRI	Mus musculus adult male testis cDNA, RIKEN full-length enriched library, clone:4930438I19 product:transforming growth factor, beta receptor I, full insert sequence.	21812	chr4	47399087	47427796	GO:0001501(skeletal development);GO:0001701(in utero embryonic development);GO:0001822(kidney development);GO:0006468(protein amino acid phosphorylation);GO:0007178(transmembrane receptor protein serine/threonine kinase signaling pathway);GO:0007179(transforming growth factor beta receptor signaling pathway);GO:0007507(heart development);GO:0008354(germ cell migration);GO:0009790(embryonic develo…	GO:0005615(extracellular space);GO:0016020(membrane);GO:0016021(integral to membrane)	GO:0000166(nucleotide binding);GO:0000287(magnesium ion binding);GO:0004672(protein kinase activity);GO:0004674(protein serine/threonine kinase activity);GO:0004675(transmembrane receptor protein serine/threonine kinase activity);GO:0004702(receptor signaling protein serine/threonine kinase activity);GO:0004872(receptor activity);GO:0005024(transforming growth factor beta receptor activity);GO:00…	Mm.197552	TC1649968	ENSMUST00000007757	79.9651	32.7925	116.548	70.5134	52.8338	42.9522	32.676	22.7494
AK015817	0.0195153	0.34672	3.39433	up	AK015817	4930517N10Rik	-	Mus musculus adult male testis cDNA, RIKEN full-length enriched library, clone:4930517N10 product:hypothetical protein, full insert sequence.	75049	chr9	106405555	106447006							134.579	40.5661	190.493	101.949	111.295	56.763	41.4386	23.4966
AK018014	0.00825691	0.280696	7.67417	up	AK018014	N/A	N/A	Mus musculus adult male thymus cDNA, RIKEN full-length enriched library, clone:5830455I16 product:T-cell receptor beta, joining region, full insert sequence.	N/A	chr6	41493223	41494097							229.669	25.7541	89.05	237.068	362.89	25.5073	28.1371	23.618
AK019623	0.0228353	0.352844	2.7986	up	AK019623	4930451E10Rik	-	Mus musculus adult male testis cDNA, RIKEN full-length enriched library, clone:4930451E10 product:hypothetical Prenyl group binding site (CAAX box) containing protein, full insert sequence.	78111	chr13	55877307	55885840				Mm.243826	TC1596769		83.3485	28.0468	116.011	46.4063	87.6287	23.3328	29.004	31.8035
AK020764	0.00169931	0.209779	11.5664	up	AK020764	A430104N18Rik	AW909330	Mus musculus 0 day neonate thymus cDNA, RIKEN full-length enriched library, clone:A430104N18 product:unclassifiable, full insert sequence.	78591	chr11	87569078	87570769							510.479	48.2109	610.805	506.033	414.599	80.3381	33.7639	30.5308
AK021127	0.0344194	0.392226	2.00941	up	AK021127	C030037D09Rik	9330160M04	Mus musculus adult male corpus striatum cDNA, RIKEN full-length enriched library, clone:C030037D09 product:unclassifiable, full insert sequence.	193280	chr11	88579958	88589886							119.015	58.8285	94.3761	159.954	102.715	42.8408	68.8831	64.7615
AK028505	0.0392558	0.405105	2.2394	up	AK028505	Rad18	2810024C04Rik,Rad18sc	Mus musculus 0 day neonate skin cDNA, RIKEN full-length enriched library, clone:4632409J05 product:RAD18 homolog (S.cerevisiae), full insert sequence.	58186	chr6	112576409	112646642	GO:0006281(DNA repair);GO:0006512(ubiquitin cycle);GO:0006974(response to DNA damage stimulus)	GO:0000785(chromatin);GO:0005634(nucleus)	GO:0003676(nucleic acid binding);GO:0003677(DNA binding);GO:0005515(protein binding);GO:0008270(zinc ion binding);GO:0016874(ligase activity);GO:0046872(metal ion binding)	Mm.103812	NP374983///TC1603079	ENSMUST00000068487	218.589	99.1447	205.587	286.141	164.04	123.912	62.4097	111.112
AK032155	0.0433284	0.416553	2.1676	up	AK032155	Cinp	1810047K05Rik,2810452K22Rik	Mus musculus adult male olfactory brain cDNA, RIKEN full-length enriched library, clone:6430403F18 product:RIKEN cDNA 1810047K05 gene, full insert sequence.	67236	chr12	112116905	112127324			GO:0016301(kinase activity)	Mm.287157	TC1595579///TC1779232///TC1593255	ENSMUST00000021705///ENSMUST00000043716	138.894	68.1559	123.523	152.22	140.938	99.6567	64.039	40.7719
AK032947	0.0481029	0.427325	2.00861	up	AK032947	Meis1	C530044H18Rik,Evi8	Mus musculus 12 days embryo male wolffian duct includes surrounding region cDNA, RIKEN full-length enriched library, clone:6720477P20 product:myeloid ecotropic viral integration site 1, full insert sequence.	17268	chr11	18909786	18918683	GO:0006350(transcription);GO:0006355(regulation of transcription, DNA-dependent);GO:0006357(regulation of transcription from RNA polymerase II promoter);GO:0007275(multicellular organismal development);GO:0045449(regulation of transcription)	GO:0005634(nucleus);GO:0005667(transcription factor complex)	GO:0003677(DNA binding);GO:0003700(transcription factor activity);GO:0003705(RNA polymerase II transcription factor activity, enhancer binding);GO:0005515(protein binding)	Mm.356578	TC1603634///TC1583508	ENSMUST00000102878	172.121	89.7891	152.56	205.579	158.225	67.3861	134.334	67.6473
AK033321	8.71911e-05	0.146493	5.61157	up	AK033321	Top2a	Top-2	Mus musculus 15 days embryo male testis cDNA, RIKEN full-length enriched library, clone:8030493B08 product:topoisomerase (DNA) II alpha, full insert sequence.	21973	chr11	98854260	98871913	GO:0006259(DNA metabolic process);GO:0006265(DNA topological change);GO:0007059(chromosome segregation);GO:0030261(chromosome condensation);GO:0040016(embryonic cleavage);GO:0045944(positive regulation of transcription from RNA polymerase II promoter)	GO:0000793(condensed chromosome);GO:0005634(nucleus);GO:0005694(chromosome);GO:0005730(nucleolus)	GO:0000166(nucleotide binding);GO:0003677(DNA binding);GO:0003916(DNA topoisomerase activity);GO:0003918(DNA topoisomerase (ATP-hydrolyzing) activity);GO:0005524(ATP binding);GO:0016853(isomerase activity)	Mm.4237	TC1573332///TC1633184	ENSMUST00000103138	227.503	40.0833	274.084	218.275	190.15	39.566	40.9747	39.7092
AK033493	0.0207987	0.351353	2.90429	up	AK033493	Fryl	2010313D22Rik,2310004H21Rik,2510002A14Rik,9030227G01Rik,AI930088,mKIAA0826	Mus musculus adult male colon cDNA, RIKEN full-length enriched library, clone:9030227G01 product:similar to DM61H21.1 (NOVEL PROTEIN) (FRAGMENT) [Mus musculus], full insert sequence.	72313	chr5	73510495	73647857			GO:0004872(receptor activity);GO:0005515(protein binding)	Mm.260594	TC1577746///TC1661330///TC1589574///TC1612797	ENSMUST00000094700///ENSMUST00000042514	85.9708	29.7446	98.9175	55.0855	103.909	24.9111	42.4844	21.8384
AK033503	0.0415409	0.412286	2.09387	up	AK033503	Ncoa7	9030406N13Rik	Mus musculus adult male colon cDNA, RIKEN full-length enriched library, clone:9030406N13 product:DJ187J11.3 (NOVEL PROTEIN SIMILAR TO DROSOPHILA L82 AND PREDICTED WORM PROTEINS) (FRAGMENT) homolog [Homo sapiens], full insert sequence.	211329	chr10	30366132	30375642	GO:0006350(transcription);GO:0006355(regulation of transcription, DNA-dependent);GO:0016998(cell wall catabolic process)	GO:0005634(nucleus)		Mm.297903	TC1619463///TC1605084///TC1583115	ENSMUST00000099982///ENSMUST00000068567	163.896	81.1268	187.288	172.606	131.795	98.5379	49.2922	95.5503
AK033962	0.0212864	0.351353	3.2365	up	AK033962	Kcnd3	AW045978,Kncd3,Kv4.3	Mus musculus adult male diencephalon cDNA, RIKEN full-length enriched library, clone:9330129C02 product:potassium voltage-gated channel, Shal-related family, member 3, full insert sequence.	56543	chr3	105255247	105470507	GO:0006810(transport);GO:0006811(ion transport);GO:0006813(potassium ion transport)	GO:0008076(voltage-gated potassium channel complex);GO:0016020(membrane);GO:0016021(integral to membrane)	GO:0005216(ion channel activity);GO:0005244(voltage-gated ion channel activity);GO:0005249(voltage-gated potassium channel activity);GO:0005267(potassium channel activity);GO:0005515(protein binding);GO:0008270(zinc ion binding);GO:0030955(potassium ion binding);GO:0046872(metal ion binding)	Mm.44530	NP377911	ENSMUST00000079169	95.5726	31.0358	68.5705	100.964	117.183	29.6313	45.8697	17.6063
AK036190	0.0313111	0.384575	2.4446	up	AK036190	Slain1	9630044O09Rik,AA675320,AW742596	Mus musculus 16 days neonate cerebellum cDNA, RIKEN full-length enriched library, clone:9630044O09 product:unclassifiable, full insert sequence.	105439	chr14	104049459	104104016				Mm.27548	TC1749183///TC1675644	ENSMUST00000069443	436.579	175.476	273.226	563.609	472.902	218.668	183.596	124.166
AK040073	0.00691675	0.269179	3.25012	up	AK040073	Il21r	NILR	Mus musculus 0 day neonate thymus cDNA, RIKEN full-length enriched library, clone:A430056E07 product:interleukin 21 receptor, full insert sequence.	60504	chr7	132746990	132775020		GO:0016020(membrane);GO:0016021(integral to membrane)	GO:0003998(acylphosphatase activity);GO:0004872(receptor activity);GO:0004888(transmembrane receptor activity);GO:0004896(hematopoietin/interferon-class (D200-domain) cytokine receptor activity);GO:0004907(interleukin receptor activity)	Mm.155643	NP853981	ENSMUST00000033000	123.492	38.7676	96.2853	122.846	151.343	53.5774	28.1358	34.5897
AK040441	0.00106422	0.1969	2.01569	up	AK040441	Fcgbp	A430096B05Rik	Mus musculus 0 day neonate thymus cDNA, RIKEN full-length enriched library, clone:A430096B05 product:similar to IGG FC BINDING PROTEIN (FRAGMENT) [Homo sapiens], full insert sequence.	215384	chr7	28885827	28905882	GO:0007155(cell adhesion);GO:0007339(binding of sperm to zona pellucida)	GO:0016020(membrane)		Mm.292276	TC1597964	ENSMUST00000076648	1471.19	730.138	1388.82	1642.54	1382.21	659.544	719.104	811.765
AK040867	0.0359966	0.396348	2.00114	up	AK040867	Pik3cd	2410099E07Rik,2610208K16Rik,AW545373,p110delta	Mus musculus adult male aorta and vein cDNA, RIKEN full-length enriched library, clone:A530031P09 product:phosphatidylinositol 3-kinase catalytic delta polypeptide, full insert sequence.	18707	chr4	149023276	149075706	GO:0001782(B cell homeostasis);GO:0007165(signal transduction);GO:0007166(cell surface receptor linked signal transduction);GO:0042113(B cell activation)	GO:0005942(phosphoinositide 3-kinase complex)	GO:0004428(inositol or phosphatidylinositol kinase activity);GO:0016301(kinase activity);GO:0016303(1-phosphatidylinositol-3-kinase activity);GO:0016740(transferase activity);GO:0016773(phosphotransferase activity, alcohol group as acceptor);GO:0046934(phosphatidylinositol-4,5-bisphosphate 3-kinase activity)	Mm.229108	TC1606478	ENSMUST00000038859	198.938	102.27	184.36	173.756	238.698	130.645	109.415	66.7506
AK041614	0.00419422	0.253022	4.7809	up	AK041614	N/A	N/A	Mus musculus 3 days neonate thymus cDNA, RIKEN full-length enriched library, clone:A630024N11 product:unclassifiable, full insert sequence.	N/A	chr15	59975824	60018963							592.361	126.072	437.769	564.551	774.762	111.824	178.711	87.6795
AK042724	0.042442	0.413902	3.59273	up	AK042724	9630013A20Rik	-	Mus musculus 7 days neonate cerebellum cDNA, RIKEN full-length enriched library, clone:A730018P19 product:unclassifiable, full insert sequence.	319903	chr14	84858530	84876231							147.155	39.0349	246.535	119.666	75.2648	32.7318	59.9869	24.386
AK042822	0.00887242	0.280696	2.27782	up	AK042822	Bend7	1110017O21Rik,E130319B15Rik	Mus musculus 7 days neonate cerebellum cDNA, RIKEN full-length enriched library, clone:A730027E01 product:hypothetical protein, full insert sequence.	209645	chr2	4639190	4709979				Mm.149539	TC1590686///TC1596374	ENSMUST00000056914	134.575	58.4254	174.258	110.357	119.109	64.1805	63.6588	47.4369
AK043372	0.0333347	0.391341	2.02101	up	AK043372	Brpf1	4833438B11Rik,4930540D11Rik,Brpf2	Mus musculus 7 days neonate cerebellum cDNA, RIKEN full-length enriched library, clone:A730089G18 product:weakly similar to zinc-finger protein, BR140 [Homo sapiens], full insert sequence.	78783	chr6	113257130	113269355	GO:0006118(electron transport);GO:0006355(regulation of transcription, DNA-dependent)	GO:0005622(intracellular);GO:0005634(nucleus)	GO:0003676(nucleic acid binding);GO:0003677(DNA binding);GO:0005515(protein binding);GO:0008270(zinc ion binding);GO:0009055(electron carrier activity);GO:0020037(heme binding);GO:0046872(metal ion binding)	Mm.356059	TC1577446	ENSMUST00000001677	251.652	121.278	173.265	242.667	339.025	97.2367	136.365	130.232
AK043598	0.00360378	0.253022	2.66516	up	AK043598	Heg1	4632417D23Rik,5530401I02Rik,9530025L16Rik,BC038614,Gm629,OTTMUSG00000027315	Mus musculus 10 days neonate cortex cDNA, RIKEN full-length enriched library, clone:A830011I05 product:hypothetical protein, full insert sequence.	77446	chr16	33755635	33768281			GO:0005509(calcium ion binding)	Mm.245741	TC1582379///TC1587452	ENSMUST00000038392	177.706	65.1459	186.306	128.278	218.534	62.8141	68.5846	64.039
AK043624	0.0483308	0.427325	2.96707	up	AK043624	Atg9a	AU019532,Apg9l1,Atg9,Atg9l1,MGC105176	Mus musculus 10 days neonate cortex cDNA, RIKEN full-length enriched library, clone:A830013B02 product:hypothetical protein, full insert sequence.	245860	chr1	75184130	75186201							104.313	31.5762	111.434	45.3855	156.12	32.5318	37.2563	24.9406
AK047459	0.000472088	0.172877	12.8583	up	AK047459	Slc38a1	AA408026,AA409865,AL022800,AU015942,NAT2	Mus musculus 10 days neonate cerebellum cDNA, RIKEN full-length enriched library, clone:B930066N23 product:AMINO ACID TRANSPORTER NAT-2 homolog [Mus musculus], full insert sequence.	105727	chr15	96405105	96471959	GO:0006865(amino acid transport);GO:0006868(glutamine transport)	GO:0005624(membrane fraction);GO:0005886(plasma membrane);GO:0016020(membrane);GO:0016021(integral to membrane);GO:0030424(axon)	GO:0005279(amino acid-polyamine transporter activity);GO:0015186(L-glutamine transporter activity)	Mm.430778///Mm.103568	TC1628022///TC1574138///TC1628778///TC1682433///TC1692929	ENSMUST00000088454	402.675	32.7522	396.2	345.81	466.015	46.8463	30.139	21.2713
AK048143	0.0214559	0.351353	2.67784	up	AK048143	Sox6	AI987981	Mus musculus 16 days embryo head cDNA, RIKEN full-length enriched library, clone:C130037G05 product:SRY-box containing gene 6, full insert sequence.	20679	chr7	122682973	123182258	GO:0006350(transcription);GO:0006355(regulation of transcription, DNA-dependent);GO:0035051(cardiac cell differentiation);GO:0042692(muscle cell differentiation);GO:0045165(cell fate commitment);GO:0051216(cartilage development)	GO:0005634(nucleus);GO:0005667(transcription factor complex)	GO:0003677(DNA binding);GO:0003700(transcription factor activity);GO:0005515(protein binding)	Mm.323365	TC1606265///TC1596307///TC1581580///TC1600084///TC1615683	ENSMUST00000072804	185.802	71.7784	145.092	227.164	185.151	88.4673	84.2076	42.6603
AK049852	0.0319769	0.387866	2.09051	up	AK049852	A030001D20Rik	1110025D03Rik	Mus musculus adult male hippocampus cDNA, RIKEN full-length enriched library, clone:C630003L02 product:unclassifiable, full insert sequence.	100126243	chr7	52891049	52894128							129.802	59.7756	154.565	80.564	154.278	68.5705	55.7097	55.0465
AK050670	0.0355843	0.395472	5.84583	up	AK050670	Numa1	6720401E04Rik,AA764025,AL022610,AU014979	Mus musculus 9 days embryo whole body cDNA, RIKEN full-length enriched library, clone:D030001E06 product:similar to NUMA PROTEIN [Homo sapiens], full insert sequence.	101706	chr7	109082624	109150173		GO:0005634(nucleus)	GO:0015631(tubulin binding)	Mm.27259	TC1572764	ENSMUST00000073022	648.06	115.834	1138.42	336.958	468.804	206.973	94.5113	46.0185
AK053296	0.0435054	0.41712	2.66192	up	AK053296	E130008D07Rik	-	Mus musculus 0 day neonate eyeball cDNA, RIKEN full-length enriched library, clone:E130008D07 product:unclassifiable, full insert sequence.	545207	chr17	43282989	43295240							68.2444	23.7403	61.7742	106.564	36.3954	20.8135	30.1974	20.2099
AK053364	0.0184354	0.345236	2.62218	up	AK053364	Lrrtm1	4632401D06Rik,AW125451	Mus musculus 0 day neonate eyeball cDNA, RIKEN full-length enriched library, clone:E130012A05 product:hypothetical Leucine-rich repeat, typical subtype containing protein, full insert sequence.	74342	chr6	77192711	77195511	GO:0008150(biological_process)	GO:0016020(membrane);GO:0016021(integral to membrane)	GO:0003674(molecular_function);GO:0005515(protein binding)	Mm.292568		ENSMUST00000020400	581.67	216.197	363.172	695.932	685.906	259.894	166.512	222.187
AK075939	0.00144871	0.198715	6.68059	up	AK075939	Card11	0610008L17Rik,2410011D02Rik,BIMP3,CARMA1	Mus musculus ES cells cDNA, RIKEN full-length enriched library, clone:2410011D02 product:CASPASE RECRUITMENT DOMAIN PROTEIN 11 (CARD-CONTAINING MAGUK PROTEIN 3) (CARMA 1) homolog [Homo sapiens], full insert sequence.	108723	chr5	141348952	141358159	GO:0006897(endocytosis);GO:0007165(signal transduction);GO:0030890(positive regulation of B cell proliferation);GO:0042102(positive regulation of T cell proliferation);GO:0042981(regulation of apoptosis);GO:0043123(positive regulation of I-kappaB kinase/NF-kappaB cascade);GO:0045061(thymic T cell selection);GO:0045086(positive regulation of interleukin-2 biosynthetic process);GO:0045577(regulatio…	GO:0005622(intracellular);GO:0005886(plasma membrane);GO:0005905(coated pit)	GO:0005515(protein binding)	Mm.46187	NP599261///TC1681645		181.947	27.2087	235.794	181.685	128.362	21.913	22.8039	36.9092
AK076905	0.0325787	0.389896	2.43727	up	AK076905	1700040F15Rik	-	Mus musculus adult male testis cDNA, RIKEN full-length enriched library, clone:4930546G02 product:weakly similar to X-LINKED LYMPHOCYTE-REGULATED PROTEIN PM1 [Mus musculus], full insert sequence.	73329	chrY_random	12235132	12267271				Mm.293024	TC1640812		113.531	44.9776	68.9517	157.31	114.33	38.4951	58.2179	38.2198
AK078282	0.0280918	0.374223	2.01612	up	AK078282	Gm3435	FLJ11152	Mus musculus adult male olfactory brain cDNA, RIKEN full-length enriched library, clone:6430567E09 product:similar to CDNA FLJ11152 FIS, CLONE PLACE1006901 (FRAGMENT) [Homo sapiens], full insert sequence.	100041621	chr17	15115831	15126375							557	273.905	393.716	604.14	673.145	343.255	221.591	256.869
AK078287	0.00655552	0.264874	2.41014	up	AK078287	Ddx58	6430573D20Rik,C330021E21,RIG-I	Mus musculus adult male olfactory brain cDNA, RIKEN full-length enriched library, clone:6430573D20 product:hypothetical DEAD/DEAH box helicase containing protein, full insert sequence.	230073	chr4	40170463	40186858	GO:0006955(immune response);GO:0009615(response to virus);GO:0042981(regulation of apoptosis);GO:0045087(innate immune response)	GO:0005622(intracellular)	GO:0000166(nucleotide binding);GO:0003676(nucleic acid binding);GO:0003723(RNA binding);GO:0004386(helicase activity);GO:0005515(protein binding);GO:0005524(ATP binding);GO:0008026(ATP-dependent helicase activity);GO:0016787(hydrolase activity)	Mm.86382	NP1220299///TC1581908	ENSMUST00000037907	135.585	54.8864	158.992	94.9022	152.86	55.1449	58.0455	51.4689
AK080004	0.0283011	0.374766	3.27112	up	AK080004	Sp100	A430075G10Rik	Mus musculus adult male aorta and vein cDNA, RIKEN full-length enriched library, clone:A530045M17 product:nuclear antigen Sp100, full insert sequence.	20684	chr1	87546624	87590884		GO:0005634(nucleus);GO:0005694(chromosome)	GO:0003677(DNA binding)	Mm.290906	TC1712709///TC1619557///TC1712402	ENSMUST00000073378///ENSMUST00000097667	172.474	51.6697	255.907	161.212	100.302	33.7226	47.5337	73.7527
AK083328	0.021038	0.351353	4.28367	up	AK083328	Lef1	3000002B05,AI451430,Lef-1	Mus musculus 2 days neonate thymus thymic cells cDNA, RIKEN full-length enriched library, clone:C920006H21 product:lymphoid enhancer binding factor 1, full insert sequence.	16842	chr3	130815714	130926249	GO:0001756(somitogenesis);GO:0001890(placenta development);GO:0006350(transcription);GO:0006355(regulation of transcription, DNA-dependent);GO:0006357(regulation of transcription from RNA polymerase II promoter);GO:0016055(Wnt receptor signaling pathway);GO:0030111(regulation of Wnt receptor signaling pathway);GO:0030326(embryonic limb morphogenesis);GO:0030879(mammary gland development);GO:00424…	GO:0005634(nucleus);GO:0005667(transcription factor complex);GO:0005737(cytoplasm)	GO:0003677(DNA binding);GO:0003682(chromatin binding);GO:0003700(transcription factor activity);GO:0003705(RNA polymerase II transcription factor activity, enhancer binding);GO:0005515(protein binding);GO:0008301(DNA bending activity);GO:0016563(transcriptional activator activity)	Mm.255219	TC1586991///TC1631022///TC1578581	ENSMUST00000029611///ENSMUST00000066849	145.036	29.5532	67.3738	251.401	116.333	25.1184	28.3943	35.1469
AK085022	0.0419312	0.412286	2.04777	up	AK085022	Lrrc49	AI430817,AW050057,D430025H09Rik	Mus musculus 13 days embryo lung cDNA, RIKEN full-length enriched library, clone:D430025H09 product:hypothetical protein, full insert sequence.	102747	chr9	60416665	60535718		GO:0005856(cytoskeleton);GO:0005874(microtubule)	GO:0005515(protein binding)	Mm.269413	TC1577426	ENSMUST00000065603	234.756	111.709	157.029	321.985	225.253	141.318	94.6131	99.1962
AK085854	0.0475881	0.426099	3.27063	up	AK085854	Crhr2	CRF-R2,CRFR2alpha,CRFR2beta,Crfr2	Mus musculus 16 days neonate heart cDNA, RIKEN full-length enriched library, clone:D830017O21 product:corticotropin releasing hormone receptor 2, full insert sequence.	12922	chr6	55048620	55082966	GO:0007165(signal transduction);GO:0007186(G-protein coupled receptor protein signaling pathway);GO:0016525(negative regulation of angiogenesis)	GO:0005615(extracellular space);GO:0016020(membrane);GO:0016021(integral to membrane)	GO:0004871(signal transducer activity);GO:0004872(receptor activity);GO:0004930(G-protein coupled receptor activity);GO:0005179(hormone activity);GO:0005515(protein binding);GO:0015056(corticotrophin-releasing factor receptor activity)	Mm.236081	TC1588074	ENSMUST00000003568	133.835	38.8869	106.042	222.963	72.5006	49.8418	44.9491	21.8698
AK086602	0.0474356	0.425671	2.06607	up	AK086602	E130114P18Rik	-	Mus musculus 15 days embryo head cDNA, RIKEN full-length enriched library, clone:D930040E13 product:unclassifiable, full insert sequence.	319865	chr4	97234565	97251320				Mm.373807	TC1607046///TC1676183	ENSMUST00000084404	118.488	58.3488	150.887	116.55	88.0272	39.3819	55.8256	79.8389
AK087950	0.0256674	0.363012	26.8714	up	AK087950	N/A	N/A	Mus musculus 2 days neonate thymus thymic cells cDNA, RIKEN full-length enriched library, clone:E430001G10 product:T-cell receptor beta, variable 13, full insert sequence.	N/A	chr6	41493458	41498351							1287.07	28.3302	115.459	2151.59	1594.17	35.7633	18.6869	30.5404
AK088576	0.0344499	0.392226	2.38022	up	AK088576	Prc1	D7Ertd348e,MGC6745	Mus musculus 2 days neonate thymus thymic cells cDNA, RIKEN full-length enriched library, clone:E430020K16 product:protein regulator of cytokinesis 1, full insert sequence.	233406	chr7	87439402	87461086	GO:0000910(cytokinesis);GO:0007049(cell cycle);GO:0051301(cell division)	GO:0005634(nucleus);GO:0005819(spindle);GO:0005874(microtubule)		Mm.227274	TC1601601		208.003	91.1246	162.042	252.868	209.097	131.019	85.9036	56.4508
AK089065	0.0374307	0.402104	3.69117	up	AK089065	Gfi1	AW495828,Gfi-1,Pal-1,Pal1	Mus musculus 2 days neonate thymus thymic cells cDNA, RIKEN full-length enriched library, clone:E430038C21 product:growth factor independent 1, full insert sequence.	14581	chr5	108145673	108154825	GO:0006350(transcription);GO:0006355(regulation of transcription, DNA-dependent);GO:0007638(mechanosensory behavior);GO:0009996(negative regulation of cell fate specification);GO:0042472(inner ear morphogenesis);GO:0042491(auditory receptor cell differentiation);GO:0042660(positive regulation of cell fate specification);GO:0045165(cell fate commitment)	GO:0005622(intracellular);GO:0005634(nucleus)	GO:0003676(nucleic acid binding);GO:0003677(DNA binding);GO:0008270(zinc ion binding);GO:0046872(metal ion binding)	Mm.2078	TC1587097	ENSMUST00000065478	166.482	45.0448	91.4587	144.359	263.627	33.3177	73.5889	28.2279
AK089214	0.0252588	0.362655	2.49069	up	AK089214	Selplg	CD162,Psgl-1,Psgl1,Selp1,Selpl	Mus musculus NOD-derived CD11c +ve dendritic cells cDNA, RIKEN full-length enriched library, clone:F630040D17 product:selectin, platelet (p-selectin) ligand, full insert sequence.	20345	chr5	114268544	114280442	GO:0007155(cell adhesion)	GO:0016020(membrane);GO:0016021(integral to membrane)	GO:0005515(protein binding);GO:0005529(sugar binding)	Mm.332590	TC1710127///TC1572763	ENSMUST00000072194///ENSMUST00000063167	378.072	154.403	277.906	480.393	375.918	158.45	100.221	204.539
AK090372	0.0116804	0.302867	2.1429	up	AK090372	Gk5	AV095337,C330018K18Rik,G630067D24Rik	Mus musculus 0 day neonate cortex cDNA, RIKEN full-length enriched library, clone:G630067D24 product:baculoviral IAP repeat-containing 1c, pseudogene 2, full insert sequence.	235533	chr9	96071334	96073882	GO:0005975(carbohydrate metabolic process);GO:0006072(glycerol-3-phosphate metabolic process)		GO:0004370(glycerol kinase activity);GO:0016301(kinase activity);GO:0016740(transferase activity)	Mm.213651	TC1597657///TC1585013	ENSMUST00000085217	229.39	109.162	243.949	199.351	244.869	118.74	130.866	77.8797
AK122347	0.0126878	0.311524	2.94513	up	AK122347	Dock10	9330153B10Rik,A630054M16Rik,Jr4,Jr5,MGC183664,R75174,ZIZ3,Zizimin3,mKIAA0694	Mus musculus mRNA for mKIAA0694 protein.	210293	chr1	80520290	80589431			GO:0005085(guanyl-nucleotide exchange factor activity);GO:0005089(Rho guanyl-nucleotide exchange factor activity);GO:0005525(GTP binding);GO:0017048(Rho GTPase binding);GO:0051020(GTPase binding)	Mm.133473	TC1609450///TC1608906///TC1585008	ENSMUST00000077946	109.129	36.2665	118.982	138.706	69.6986	27.3737	44.26	37.1659
AK122370	0.040614	0.409906	2.17592	up	AK122370	Camkk2	6330570N16Rik,AW061083,mKIAA0787	Mus musculus mRNA for mKIAA0787 protein.	207565	chr5	123183212	123203841	GO:0006468(protein amino acid phosphorylation);GO:0046777(protein amino acid autophosphorylation)		GO:0000166(nucleotide binding);GO:0004672(protein kinase activity);GO:0004674(protein serine/threonine kinase activity);GO:0005509(calcium ion binding);GO:0005516(calmodulin binding);GO:0005524(ATP binding);GO:0016301(kinase activity);GO:0016740(transferase activity)	Mm.394637///Mm.289237	TC1601159///NP1298587	ENSMUST00000047365	132.555	60.3095	85.2557	156.246	156.164	55.9774	45.272	79.6792
AK131134	0.000214173	0.150986	7.09712	up	AK131134	Card11	0610008L17Rik,2410011D02Rik,BIMP3,CARMA1	Mus musculus mRNA for mFLJ00120 protein.	108723	chr5	141348952	141476446	GO:0006897(endocytosis);GO:0007165(signal transduction);GO:0030890(positive regulation of B cell proliferation);GO:0042102(positive regulation of T cell proliferation);GO:0042981(regulation of apoptosis);GO:0043123(positive regulation of I-kappaB kinase/NF-kappaB cascade);GO:0045061(thymic T cell selection);GO:0045086(positive regulation of interleukin-2 biosynthetic process);GO:0045577(regulatio…	GO:0005622(intracellular);GO:0005886(plasma membrane);GO:0005905(coated pit)	GO:0005515(protein binding)	Mm.46187	NP599261///TC1681645		188.45	26.7032	224.927	167.327	173.095	32.4549	21.3327	26.322
AK133964	0.0107731	0.296619	2.36808	up	AK133964	Mki67	D630048A14Rik,Ki-67,Ki67	Mus musculus 8 days embryo whole body cDNA, RIKEN full-length enriched library, clone:5730578O05 product:antigen identified by monoclonal antibody Ki 67, full insert sequence.	17345	chr7	142881466	142890771	GO:0007126(meiosis);GO:0008283(cell proliferation)	GO:0000775(chromosome, pericentric region);GO:0000793(condensed chromosome);GO:0005634(nucleus);GO:0005730(nucleolus);GO:0005737(cytoplasm)		Mm.4078	TC1572202	ENSMUST00000033310	381.979	162.607	303.359	460.047	382.532	152.756	125.701	209.363
AK134717	0.0221974	0.352386	6.04599	up	AK134717	N/A	N/A	Mus musculus adult male medulla oblongata cDNA, RIKEN full-length enriched library, clone:6330535C15 product:unclassifiable, full insert sequence.	N/A	chr7	135121654	135123168							173.572	22.9084	126.23	61.7742	332.712	19.5915	22.4851	26.6485
AK135348	0.0015137	0.198715	2.52592	up	AK135348	Elovl1	AA407424,BB151133,Ssc1	Mus musculus 12 days embryo female mullerian duct includes surrounding region cDNA, RIKEN full-length enriched library, clone:6820403H06 product:elongation of very long chain fatty acids (FEN1/Elo2, SUR4/Elo3, yeast)-like 1, full insert sequence.	54325	chr4	118100697	118105218	GO:0006633(fatty acid biosynthetic process);GO:0008610(lipid biosynthetic process)	GO:0005783(endoplasmic reticulum);GO:0016020(membrane);GO:0016021(integral to membrane)		Mm.282096	TC1590108	ENSMUST00000102673	8636.02	3452	8878.01	9165.19	7864.84	3733.61	3884.32	2738.07
AK135817	0.00928398	0.28744	2.80103	up	AK135817	N/A	N/A	Mus musculus in vitro fertilized eggs cDNA, RIKEN full-length enriched library, clone:7420422A16 product:synaptotagmin-like 2, full insert sequence.	N/A	chr7	97523898	97529601							111.032	38.1792	71.997	147.117	113.982	43.2152	36.3645	34.9579
AK137210	0.0150636	0.329091	4.29026	up	AK137210	Calcrl	AV071593,CRLR	Mus musculus adult male urinary bladder cDNA, RIKEN full-length enriched library, clone:9530048D22 product:calcitonin receptor-like, full insert sequence.	54598	chr2	84172889	84265424	GO:0007165(signal transduction);GO:0007186(G-protein coupled receptor protein signaling pathway);GO:0007189(G-protein signaling, adenylate cyclase activating pathway);GO:0007507(heart development);GO:0008284(positive regulation of cell proliferation)	GO:0005615(extracellular space);GO:0016020(membrane);GO:0016021(integral to membrane)	GO:0001635(calcitonin gene-related polypeptide receptor activity);GO:0004871(signal transducer activity);GO:0004872(receptor activity);GO:0004930(G-protein coupled receptor activity);GO:0004948(calcitonin receptor activity)	Mm.75467	TC1583851///TC1594954	ENSMUST00000099944///ENSMUST00000074262	92.2712	18.8562	49.18	66.7101	160.924	18.057	19.9823	18.5292
AK137907	0.0201877	0.349552	7.16237	up	AK137907	Fyb	ADAP,B630013F22Rik	Mus musculus 16 days neonate thymus cDNA, RIKEN full-length enriched library, clone:A130038E08 product:FYN binding protein, full insert sequence.	23880	chr15	6529870	6613312	GO:0045576(mast cell activation)	GO:0005634(nucleus)		Mm.170905	TC1617202///TC1690648///TC1613159	ENSMUST00000090461	392.75	59.4238	214.352	588.557	375.343	67.9447	89.0192	21.3076
AK139759	0.049813	0.428121	2.53213	up	AK139759	LOC100041034	-	Mus musculus 2 cells egg cDNA, RIKEN full-length enriched library, clone:B020015I04 product:hypothetical Sp100 containing protein, full insert sequence.	100041034	chr1_random	585650	591090							171.239	70.752	117.75	212.084	183.884	38.4717	72.8151	100.969
AK143215	0.00672998	0.265901	3.63671	up	AK143215	Map4k1	Hpk1,mHPK1	Mus musculus 0 day neonate eyeball cDNA, RIKEN full-length enriched library, clone:E130311C23 product:mitogen activated protein kinase kinase kinase kinase 1, full insert sequence.	26411	chr7	29767068	29788297	GO:0006468(protein amino acid phosphorylation);GO:0006950(response to stress);GO:0007243(protein kinase cascade);GO:0018105(peptidyl-serine phosphorylation);GO:0045610(regulation of hemocyte differentiation)		GO:0000166(nucleotide binding);GO:0004672(protein kinase activity);GO:0004674(protein serine/threonine kinase activity);GO:0005083(small GTPase regulator activity);GO:0005515(protein binding);GO:0005524(ATP binding);GO:0008349(MAP kinase kinase kinase kinase activity);GO:0016301(kinase activity);GO:0016740(transferase activity)	Mm.148278	TC1642169	ENSMUST00000085835	296.179	83.9442	359.698	299.564	229.275	58.403	120.358	73.0714
AK143677	0.0242337	0.356508	7.30328	up	AK143677	Mki67	D630048A14Rik,Ki-67,Ki67	Mus musculus 6 days neonate spleen cDNA, RIKEN full-length enriched library, clone:F430008O15 product:antigen identified by monoclonal antibody Ki 67, full insert sequence.	17345	chr7	142891753	142908042	GO:0007126(meiosis);GO:0008283(cell proliferation)	GO:0000775(chromosome, pericentric region);GO:0000793(condensed chromosome);GO:0005634(nucleus);GO:0005730(nucleolus);GO:0005737(cytoplasm)		Mm.4078	TC1572202	ENSMUST00000033310	352.096	36.6548	280.542	677.005	98.7428	37.616	30.817	41.5314
AK144695	0.0307644	0.383329	3.08914	up	AK144695	N/A	N/A	Mus musculus lung RCB-0558 LLC cDNA, RIKEN full-length enriched library, clone:G730023M12 product:unclassifiable, full insert sequence.	N/A	chr11	31445796	31449654							146.056	48.2679	152.035	195.276	90.8563	29.4954	72.544	42.7643
AK146054	0.0340249	0.391473	2.57136	up	AK146054	Sp100	A430075G10Rik	Mus musculus 14 days pregnant adult female placenta cDNA, RIKEN full-length enriched library, clone:I530027C13 product:nuclear antigen Sp100, full insert sequence.	20684	chr1	87546624	87579693		GO:0005634(nucleus);GO:0005694(chromosome)	GO:0003677(DNA binding)	Mm.290906	TC1712709///TC1619557///TC1712402	ENSMUST00000073378///ENSMUST00000097667	89.8388	34.1937	54.7133	124.379	90.4246	29.6269	46.9139	26.0404
AK147757	0.0140616	0.323467	4.35891	up	AK147757	Arhgap30	6030405P05Rik,FLJ00267,Gm102,MGC99989,mFLJ00267	Mus musculus melanocyte cDNA, RIKEN full-length enriched library, clone:G270026A07 product:similar to Cdc42 GTPase-activating protein (Fragment) [Homo sapiens], full insert sequence.	226652	chr1	173319142	173340429	GO:0007165(signal transduction);GO:0008150(biological_process)	GO:0005575(cellular_component);GO:0005622(intracellular)	GO:0003674(molecular_function);GO:0005096(GTPase activator activity)	Mm.251048	TC1580098	ENSMUST00000056449	321.147	73.7125	218.854	486.001	258.587	103.517	74.638	42.9829
AK149935	0.0321859	0.388014	2.50537	up	AK149935	Pik3cd	2410099E07Rik,2610208K16Rik,AW545373,p110delta	Mus musculus bone marrow macrophage cDNA, RIKEN full-length enriched library, clone:G530106J11 product:phosphatidylinositol 3-kinase catalytic delta polypeptide, full insert sequence.	18707	chr4	149023276	149072798	GO:0001782(B cell homeostasis);GO:0007165(signal transduction);GO:0007166(cell surface receptor linked signal transduction);GO:0042113(B cell activation)	GO:0005942(phosphoinositide 3-kinase complex)	GO:0004428(inositol or phosphatidylinositol kinase activity);GO:0016301(kinase activity);GO:0016303(1-phosphatidylinositol-3-kinase activity);GO:0016740(transferase activity);GO:0016773(phosphotransferase activity, alcohol group as acceptor);GO:0046934(phosphatidylinositol-4,5-bisphosphate 3-kinase activity)	Mm.229108	TC1606478	ENSMUST00000038859	220.296	87.7733	147.723	211.099	302.068	66.1124	124.342	72.8655
AK149943	0.033604	0.391435	2.19113	up	AK149943	2310014H01Rik	AA407849,AI450394	Mus musculus bone marrow macrophage cDNA, RIKEN full-length enriched library, clone:G530108E03 product:hypothetical Proline-rich region profile/Glutamine-rich region profile containing protein, full insert sequence.	76448	chr17	36003000	36012539				Mm.359982	TC1577553		200.737	89.278	289.808	153.552	158.852	77.3248	114.828	75.6817
AK151423	0.00119181	0.1969	9.00286	up	AK151423	Hmha1	6330406L22Rik,AW539505,Ha-1,KIAA0223	Mus musculus bone marrow macrophage cDNA, RIKEN full-length enriched library, clone:I830030A01 product:Similar to MYELOBLAST KIAA0223 (Hypothetical protein) homolog [Mus musculus], full insert sequence.	70719	chr10	79479660	79494213	GO:0006118(electron transport);GO:0007242(intracellular signaling cascade)	GO:0005622(intracellular)	GO:0009055(electron carrier activity);GO:0020037(heme binding)	Mm.243954	TC1577344///TC1624005	ENSMUST00000099501///ENSMUST00000043311	645.785	74.7938	657.95	512.594	766.809	45.5535	74.763	104.065
AK153812	0.00421378	0.253022	4.83629	up	AK153812	Ptpn22	70zpep,PEP,Ptpn8	Mus musculus 2 days neonate thymus thymic cells cDNA, RIKEN full-length enriched library, clone:C920004C21 product:protein tyrosine phosphatase, non-receptor type 8, full insert sequence.	19260	chr3	103663717	103716170	GO:0006470(protein amino acid dephosphorylation);GO:0016311(dephosphorylation);GO:0030217(T cell differentiation);GO:0050852(T cell receptor signaling pathway)		GO:0004721(phosphoprotein phosphatase activity);GO:0004725(protein tyrosine phosphatase activity);GO:0004872(receptor activity);GO:0016787(hydrolase activity);GO:0016791(phosphoric monoester hydrolase activity)	Mm.395	TC1579598	ENSMUST00000029433	119.142	23.2465	178.677	104.004	74.7459	19.7611	23.2357	26.7426
AK153838	0.0243007	0.356715	2.66069	up	AK153838	Timeless	C77407,Debt69,tim	Mus musculus 2 days neonate thymus thymic cells cDNA, RIKEN full-length enriched library, clone:C920017H14 product:timeless homolog (Drosophila), full insert sequence.	21853	chr10	127669144	127689908	GO:0002009(morphogenesis of an epithelium);GO:0006350(transcription);GO:0006355(regulation of transcription, DNA-dependent);GO:0007275(multicellular organismal development);GO:0007623(circadian rhythm);GO:0016481(negative regulation of transcription);GO:0030324(lung development);GO:0048511(rhythmic process)	GO:0005634(nucleus)	GO:0003677(DNA binding);GO:0005515(protein binding);GO:0042803(protein homodimerization activity);GO:0046982(protein heterodimerization activity)	Mm.6458	NP859432	ENSMUST00000055539	262.71	96.5855	387.904	201.595	198.63	76.371	130.889	82.4965
AK154127	0.0348958	0.393837	3.12886	up	AK154127	Pim1	Pim-1	Mus musculus NOD-derived CD11c +ve dendritic cells cDNA, RIKEN full-length enriched library, clone:F630003I04 product:proviral integration site 1, full insert sequence.	18712	chr17	29630031	29632404	GO:0006468(protein amino acid phosphorylation);GO:0008283(cell proliferation);GO:0043066(negative regulation of apoptosis)	GO:0005634(nucleus);GO:0005737(cytoplasm)	GO:0000166(nucleotide binding);GO:0004672(protein kinase activity);GO:0004674(protein serine/threonine kinase activity);GO:0005515(protein binding);GO:0005524(ATP binding);GO:0016301(kinase activity);GO:0016740(transferase activity);GO:0030145(manganese ion binding);GO:0046872(metal ion binding)	Mm.405293///Mm.328931	TC1621945	ENSMUST00000024811	1530.53	437.239	2676.48	934.697	980.408	434.299	528.676	348.743
AK154137	0.0447199	0.419466	2.77534	up	AK154137	Arl5c	Arl12,BC065791,MGC73657	Mus musculus NOD-derived CD11c +ve dendritic cells cDNA, RIKEN full-length enriched library, clone:F630004B03 product:similar to ADP-ribosylation factor-like protein 8 [Homo sapiens], full insert sequence.	217151	chr11	97850893	97857487	GO:0007264(small GTPase mediated signal transduction)	GO:0005622(intracellular)	GO:0000166(nucleotide binding);GO:0005525(GTP binding)	Mm.277896	TC1585014///TC1634411	ENSMUST00000042971	91.9135	29.3285	49.9937	66.9644	158.782	27.6536	33.4485	26.8835
AK154184	0.0493619	0.427694	3.98222	up	AK154184	Cyba	b558,nmf333,p22phox	Mus musculus NOD-derived CD11c +ve dendritic cells cDNA, RIKEN full-length enriched library, clone:F630007H21 product:unclassifiable, full insert sequence.	13057	chr8	124952798	124956807	GO:0006118(electron transport);GO:0006801(superoxide metabolic process);GO:0006810(transport)	GO:0005737(cytoplasm);GO:0005739(mitochondrion);GO:0016020(membrane);GO:0016021(integral to membrane)	GO:0005506(iron ion binding);GO:0005515(protein binding);GO:0016491(oxidoreductase activity);GO:0020037(heme binding);GO:0046872(metal ion binding)	Mm.271671	TC1681486	ENSMUST00000017604	145.243	31.0844	222.998	47.9362	164.794	29.3423	23.5609	40.35
AK155835	0.00600853	0.26248	3.05682	up	AK155835	Pik3cd	2410099E07Rik,2610208K16Rik,AW545373,p110delta	Mus musculus B6-derived CD11 +ve dendritic cells cDNA, RIKEN full-length enriched library, clone:F730228K20 product:phosphatidylinositol 3-kinase catalytic delta polypeptide, full insert sequence.	18707	chr4	149027915	149075699	GO:0001782(B cell homeostasis);GO:0007165(signal transduction);GO:0007166(cell surface receptor linked signal transduction);GO:0042113(B cell activation)	GO:0005942(phosphoinositide 3-kinase complex)	GO:0004428(inositol or phosphatidylinositol kinase activity);GO:0016301(kinase activity);GO:0016303(1-phosphatidylinositol-3-kinase activity);GO:0016740(transferase activity);GO:0016773(phosphotransferase activity, alcohol group as acceptor);GO:0046934(phosphatidylinositol-4,5-bisphosphate 3-kinase activity)	Mm.229108	TC1606478	ENSMUST00000038859	81.876	25.6177	65.3446	118.392	61.8913	25.0033	27.2176	24.6323
AK155863	0.0405651	0.409813	4.81617	up	AK155863	Gpsm3	AA960287,AGS4	Mus musculus B6-derived CD11 +ve dendritic cells cDNA, RIKEN full-length enriched library, clone:F730311C03 product:G-protein signalling modulator 3 (AGS3-like, C. elegans), full insert sequence.	106512	chr17	34727101	34728697	GO:0007165(signal transduction)		GO:0005096(GTPase activator activity)	Mm.26584	TC1581158	ENSMUST00000038325	266.307	52.1604	98.8302	373.719	326.372	53.5951	26.2827	76.6034
AK156764	0.0446406	0.41933	2.68572	up	AK156764	Tmc8	EVIN2,Ever2,FLJ00400,mFLJ00400	Mus musculus activated spleen cDNA, RIKEN full-length enriched library, clone:F830048H14 product:epidermodysplasia verruciformis 2, full insert sequence.	217356	chr11	117643628	117654342		GO:0005783(endoplasmic reticulum);GO:0016020(membrane);GO:0016021(integral to membrane)		Mm.116675	TC1584292	ENSMUST00000050874	160.472	64.9912	128.178	166.666	186.574	31.9759	67.0852	95.9126
AK157955	0.00129774	0.1969	2.79075	up	AK157955	Whrn	1110035G07Rik,AW122018,AW742671,C430046P22Rik,MGC183668,bM340H1.8,mKIAA1526,wi	Mus musculus adult inner ear cDNA, RIKEN full-length enriched library, clone:F930011M09 product:whirlin, full insert sequence.	73750	chr4	63092467	63156985	GO:0007605(sensory perception of sound)	GO:0005884(actin filament);GO:0005929(cilium)	GO:0005515(protein binding)	Mm.300397	NP1398818///TC1635500	ENSMUST00000084510	220.455	80.0606	221.238	206.839	233.288	62.3121	94.1474	83.7222
AK158151	0.00452629	0.253022	3.38996	up	AK158151	Gm1604b	ENSMUSG00000073470,Gm1604	Mus musculus adult inner ear cDNA, RIKEN full-length enriched library, clone:F930035N09 product:hypothetical protein, full insert sequence.	381059	chr17	7283606	7286452							143.287	41.5897	98.3369	175.443	156.082	47.9453	44.2226	32.6012
AK158671	0.0039863	0.253022	2.52165	up	AK158671	Cep164	AI450905,BC027092,D030051D21,KIAA1052,MGC38792,mKIAA1052	Mus musculus visual cortex cDNA, RIKEN full-length enriched library, clone:K230049M01 product:hypothetical protein, full insert sequence.	214552	chr9	45617786	45636722				Mm.260103	TC1581546///TC1593974///TC1616013	ENSMUST00000084234	144.318	56.8678	157.141	164.979	110.833	67.7005	52.016	50.8869
AK158820	0.0195902	0.34672	2.72581	up	AK158820	Fmnl1	8030453N10Rik,AI553564,Fmnl,Fnrl,Frls	Mus musculus visual cortex cDNA, RIKEN full-length enriched library, clone:K430335F13 product:formin-like 1, full insert sequence.	57778	chr11	103053625	103060214	GO:0006929(substrate-bound cell migration);GO:0009987(cellular process);GO:0016043(cellular component organization and biogenesis);GO:0030036(actin cytoskeleton organization and biogenesis)	GO:0005829(cytosol)	GO:0003779(actin binding);GO:0005522(profilin binding);GO:0017048(Rho GTPase binding)	Mm.138913	NP377746	ENSMUST00000021322	458.954	158.659	294.969	695.024	386.868	171.005	133.735	171.236
AK159369	0.0179414	0.343393	3.14485	up	AK159369	Mical1	MGC27831,MGC38321,MICAL,Nical	Mus musculus osteoclast-like cell cDNA, RIKEN full-length enriched library, clone:I420018J08 product:NEDD9 interacting protein with calponin homology and LIM domains, full insert sequence.	171580	chr10	41196182	41206836	GO:0006118(electron transport);GO:0006725(aromatic compound metabolic process);GO:0007010(cytoskeleton organization and biogenesis);GO:0007165(signal transduction)	GO:0005737(cytoplasm);GO:0005856(cytoskeleton);GO:0005882(intermediate filament)	GO:0004497(monooxygenase activity);GO:0005515(protein binding);GO:0008270(zinc ion binding);GO:0017124(SH3 domain binding);GO:0046872(metal ion binding)	Mm.290431	TC1573433	ENSMUST00000099934	366.061	115.634	470.66	227.528	399.995	111.527	156.439	78.9354
AK160255	0.00320648	0.24389	2.72498	up	AK160255	Chn2	1700026N20Rik,4930557O16Rik,ARHGAP3,Bch	Mus musculus adult male testis cDNA, RIKEN full-length enriched library, clone:4930557O16 product:chimerin (chimaerin) 2, full insert sequence.	69993	chr6	54217172	54251804	GO:0007165(signal transduction);GO:0007242(intracellular signaling cascade);GO:0008150(biological_process)	GO:0005622(intracellular);GO:0016020(membrane);GO:0019717(synaptosome)	GO:0005096(GTPase activator activity);GO:0008270(zinc ion binding);GO:0019992(diacylglycerol binding);GO:0046872(metal ion binding)	Mm.321147	TC1632473///TC1617451///TC1589556	ENSMUST00000067741	148.99	55.2094	142.38	129.918	174.671	43.3092	68.476	53.8431
AK160763	0.00861638	0.280696	2.26099	up	AK160763	Prpsap1	5730409F23Rik,PAP39	Mus musculus 13 days embryo head cDNA, RIKEN full-length enriched library, clone:3110057F06 product:Phosphoribosylpyrophosphate synthetase-associated protein homolog [Mus musculus], full insert sequence.	67763	chr11	116346844	116351651	GO:0009116(nucleoside metabolic process);GO:0009165(nucleotide biosynthetic process)	GO:0005615(extracellular space)	GO:0000287(magnesium ion binding);GO:0004749(ribose phosphate diphosphokinase activity)	Mm.25125	TC1766749///TC1595785	ENSMUST00000021153	337.668	150.938	320.244	293.068	399.69	167.674	173.723	111.418
AK161148	0.0386997	0.403509	3.03856	up	AK161148	Zc3h7a	A430104C18Rik,AI447294,AW556219,HSPC055,Zc3h7,Zc3hdc7	Mus musculus 10 days neonate skin cDNA, RIKEN full-length enriched library, clone:4732481K02 product:Hypothetical TPR repeat containing protein (Fragment) homolog [Mus musculus], full insert sequence.	106205	chr16	11155928	11162770		GO:0005622(intracellular)	GO:0003676(nucleic acid binding);GO:0008270(zinc ion binding)	Mm.226860	TC1574079///TC1611245	ENSMUST00000037633	154.98	47.527	100.834	260.711	103.396	53.4032	31.4015	57.7762
AK162812	0.033904	0.391473	2.07808	up	AK162812	Ktn1	-	Mus musculus 16 days neonate thymus cDNA, RIKEN full-length enriched library, clone:A130094E24 product:kinectin 1, full insert sequence.	16709	chr14	48324925	48335151	GO:0007018(microtubule-based movement)	GO:0005783(endoplasmic reticulum);GO:0016020(membrane);GO:0016021(integral to membrane)	GO:0019894(kinesin binding)	Mm.3110	NP586345///TC1574740	ENSMUST00000022391///ENSMUST00000070762	108.68	51.2371	120.222	71.2786	134.541	47.7615	42.1831	63.7668
AK163445	0.00275918	0.234804	3.13937	up	AK163445	Slc2a6	A330096C23,F630103L12Rik,Glut6,Glut9	Mus musculus adult male corpora quadrigemina cDNA, RIKEN full-length enriched library, clone:B230038A01 product:solute carrier family 2 (facilitated glucose transporter), member 6, full insert sequence.	227659	chr2	26878071	26883518	GO:0006810(transport);GO:0008643(carbohydrate transport)	GO:0016020(membrane);GO:0016021(integral to membrane)	GO:0005215(transporter activity);GO:0005351(sugar porter activity)	Mm.41203	NP968339	ENSMUST00000102890	134.404	43.1171	110.794	161.426	130.993	55.2498	38.5526	35.5488
AK164802	0.0489193	0.427659	2.3192	up	AK164802	Nup160	160kDa,2810011M03Rik,AA414952,AU020188,Gtl-13,Gtl1-13,Gtl13,KIAA0197,mKIAA0197	Mus musculus 16 days neonate heart cDNA, RIKEN full-length enriched library, clone:D830005I23 product:nucleoporin 160, full insert sequence.	59015	chr2	90519170	90549210	GO:0006406(mRNA export from nucleus);GO:0006810(transport)	GO:0005634(nucleus);GO:0005643(nuclear pore)	GO:0003993(acid phosphatase activity);GO:0005487(nucleocytoplasmic transporter activity);GO:0005515(protein binding)	Mm.24532	NP839840	ENSMUST00000057481	82.5438	37.913	97.7104	65.0309	84.8901	32.8228	58.331	22.5853
AK164938	0.0111679	0.300886	2.4217	up	AK164938	AI451617	-	Mus musculus 0 day neonate lung cDNA, RIKEN full-length enriched library, clone:E030033P18 product:similar to Tripartite motif protein 30 (Down regulatory protein of interleukin 2 receptor) [Mus musculus], full insert sequence.	209387	chr7	111620362	111656339		GO:0005622(intracellular)	GO:0004872(receptor activity);GO:0005515(protein binding);GO:0008270(zinc ion binding);GO:0046872(metal ion binding)	Mm.277377	TC1647943///TC1590898	ENSMUST00000033211	211.368	87.9931	261.424	169.725	202.955	82.5143	114.145	67.3198
AK165031	0.0420595	0.412816	2.09678	up	AK165031	Ccdc52	D16Ertd480e	Mus musculus 0 day neonate eyeball cDNA, RIKEN full-length enriched library, clone:E130309J01 product:hypothetical protein, full insert sequence.	212514	chr16	44347569	44370491				Mm.446962///Mm.24035	TC1622283///TC1580221///TC1591034	ENSMUST00000050897	120.58	54.4171	183.092	90.6409	88.0068	56.3969	46.7062	60.1481
AK165453	0.03858	0.403287	2.79424	up	AK165453	BC021785	Naglt1c	Mus musculus adult male kidney cDNA, RIKEN full-length enriched library, clone:F530005F10 product:Na+ dependent glucose transporter 1 homolog [Rattus norvegicus], full insert sequence.	215928	chr10	39677866	39706452	GO:0006810(transport)	GO:0016020(membrane);GO:0016021(integral to membrane)	GO:0005215(transporter activity);GO:0005351(sugar porter activity)	Mm.31744	TC1587512	ENSMUST00000045524	127.968	45.1551	164.441	71.3681	148.094	35.6889	65.909	33.8675
AK165897	0.0243994	0.356715	3.57494	up	AK165897	Racgap1	AI227039,AI327394,Band25,GTPase,MgcRacGAP,gtl11,mKIAA1478	Mus musculus lung RCB-0558 LLC cDNA, RIKEN full-length enriched library, clone:G730015N23 product:Rac GTPase-activating protein 1, full insert sequence.	26934	chr15	99450926	99482052	GO:0000910(cytokinesis);GO:0000915(cytokinesis, contractile ring formation);GO:0006118(electron transport);GO:0007049(cell cycle);GO:0007108(cytokinesis, initiation of separation);GO:0007165(signal transduction);GO:0007242(intracellular signaling cascade);GO:0007283(spermatogenesis);GO:0007405(neuroblast proliferation);GO:0009790(embryonic development);GO:0051301(cell division)	GO:0005622(intracellular);GO:0005634(nucleus)	GO:0005096(GTPase activator activity);GO:0005506(iron ion binding);GO:0005515(protein binding);GO:0008270(zinc ion binding);GO:0009055(electron carrier activity);GO:0019992(diacylglycerol binding);GO:0043014(alpha-tubulin binding);GO:0043015(gamma-tubulin binding);GO:0046872(metal ion binding);GO:0048487(beta-tubulin binding)	Mm.273804	TC1702403///TC1573455	ENSMUST00000023756	233.373	63.7766	124.241	315.609	260.268	59.7028	90.1042	41.5228
AK165971	0.00209125	0.222178	2.84193	up	AK165971	Pign	-	Mus musculus lung RCB-0558 LLC cDNA, RIKEN full-length enriched library, clone:G730025B18 product:phosphatidylinositol glycan, class N, full insert sequence.	27392	chr1	107543205	107560239	GO:0006506(GPI anchor biosynthetic process);GO:0008152(metabolic process);GO:0009117(nucleotide metabolic process)	GO:0005615(extracellular space);GO:0005783(endoplasmic reticulum);GO:0016020(membrane);GO:0016021(integral to membrane)	GO:0016740(transferase activity);GO:0016780(phosphotransferase activity, for other substituted phosphate groups);GO:0016787(hydrolase activity)	Mm.405610///Mm.268911	TC1582595///TC1596470	ENSMUST00000070699	93.3871	32.8373	102.673	74.6348	102.854	33.1066	27.0228	38.3824
AK166189	0.0289789	0.376289	2.32107	up	AK166189	Patz1	8430401L15Rik,AI447519,Mazr,Patz,Zfp278	Mus musculus mammary gland RCB-0526 Jyg-MC(A) cDNA, RIKEN full-length enriched library, clone:G830011F05 product:zinc finger protein 278, full insert sequence.	56218	chr11	3190459	3195427	GO:0006350(transcription);GO:0006355(regulation of transcription, DNA-dependent);GO:0016481(negative regulation of transcription)	GO:0005622(intracellular);GO:0005634(nucleus)	GO:0003676(nucleic acid binding);GO:0005515(protein binding);GO:0008270(zinc ion binding);GO:0016563(transcriptional activator activity);GO:0016564(transcriptional repressor activity);GO:0046872(metal ion binding)	Mm.275563	TC1595776	ENSMUST00000057089	146.683	62.4065	97.4408	189.181	153.426	69.7455	73.1285	44.3456
AK166242	0.0359874	0.396348	3.05166	up	AK166242	Zbtb37	D430004I08Rik	Mus musculus mammary gland RCB-0526 Jyg-MC(A) cDNA, RIKEN full-length enriched library, clone:G830022O15 product:Hypothetical BTB/POZ domain containing protein, full insert sequence.	240869	chr1	162938924	162964979	GO:0006350(transcription);GO:0006355(regulation of transcription, DNA-dependent)	GO:0005622(intracellular)	GO:0003676(nucleic acid binding);GO:0005515(protein binding);GO:0008270(zinc ion binding);GO:0046872(metal ion binding)	Mm.296127	TC1585551///TC1590707	ENSMUST00000053513///ENSMUST00000064713	143.698	50.8855	111.387	194.312	125.395	85.8483	35.2472	31.5611
AK166428	0.00489464	0.253472	2.55533	up	AK166428	Cdkl3	AI852479,B230379H01Rik,MGC28957	Mus musculus mammary gland RCB-0527 Jyg-MC(B) cDNA, RIKEN full-length enriched library, clone:G930017H24 product:cyclin-dependent kinase-like 3, full insert sequence.	213084	chr11	51817742	51851667	GO:0006468(protein amino acid phosphorylation)		GO:0000166(nucleotide binding);GO:0004672(protein kinase activity);GO:0004674(protein serine/threonine kinase activity);GO:0005524(ATP binding);GO:0016301(kinase activity);GO:0016740(transferase activity)	Mm.280557	TC1593941///NP522180	ENSMUST00000063303	84.5699	33.4759	76.7964	76.5992	100.314	25.7276	32.8342	41.8658
AK166716	0.00605	0.26248	2.53588	up	AK166716	Rgs11	C78048	Mus musculus blastocyst blastocyst cDNA, RIKEN full-length enriched library, clone:I1C0006J07 product:regulator of G-protein signaling 11, full insert sequence.	50782	chr17	26344786	26348269	GO:0007186(G-protein coupled receptor protein signaling pathway);GO:0007242(intracellular signaling cascade);GO:0009968(negative regulation of signal transduction)	GO:0005834(heterotrimeric G-protein complex)	GO:0004871(signal transducer activity);GO:0005096(GTPase activator activity);GO:0005515(protein binding)	Mm.109840	TC1613950	ENSMUST00000025020	116.598	45.576	86.181	136.047	127.568	38.8589	43.0761	54.7931
AK167468	0.0437279	0.41712	2.06968	up	AK167468	Hk1	BB404130,Hk-1,Hk1-s,dea,mHk1-s	Mus musculus 14 days pregnant adult female placenta cDNA, RIKEN full-length enriched library, clone:I530016C13 product:hexokinase 1, full insert sequence.	15275	chr10	61732609	61803106	GO:0006096(glycolysis)	GO:0005739(mitochondrion);GO:0005829(cytosol);GO:0016020(membrane)	GO:0000166(nucleotide binding);GO:0003824(catalytic activity);GO:0004396(hexokinase activity);GO:0005524(ATP binding);GO:0016301(kinase activity);GO:0016740(transferase activity)	Mm.196605	NP051575///TC1591776///TC1686155///TC1615139	ENSMUST00000072357///ENSMUST00000020274	806.095	411.643	777.117	885.588	755.58	577.455	409.347	248.128
AK169490	0.0294535	0.377618	5.94025	up	AK169490	Akr1b10	2310005E10Rik	Mus musculus 3 days neonate thymus cDNA, RIKEN full-length enriched library, clone:A630040N05 product:Aldose reductase homolog [Mus musculus], full insert sequence.	67861	chr6	34334246	34339555			GO:0016491(oxidoreductase activity)	Mm.70371	TC1654623///TC1590238	ENSMUST00000038383	420.943	53.2528	158.751	218.728	885.349	56.8885	43.2203	59.6497
AK169558	0.0245054	0.356879	4.19172	up	AK169558	Themis	A430108D01,BB160712,E430004N04Rik,Gasp,Tsepa,thylex	Mus musculus 2 days neonate thymus thymic cells cDNA, RIKEN full-length enriched library, clone:C920001C08 product:hypothetical protein, full insert sequence.	210757	chr10	28388200	28602555				Mm.123021	TC1593091///TC1583774///TC1596190	ENSMUST00000056097	181.847	37.9228	71.2296	215.928	258.383	33.5567	39.3863	40.8255
AK169825	0.0421137	0.412834	2.65081	up	AK169825	Skap1	1700091G21Rik,Scap1,Skap-55	Mus musculus 2 days neonate thymus thymic cells cDNA, RIKEN full-length enriched library, clone:E430029H02 product:SKAP55 adaptor protein homolog [Rattus norvegicus], full insert sequence.	78473	chr11	96325937	96620936	GO:0006955(immune response)	GO:0005634(nucleus);GO:0016020(membrane)	GO:0019904(protein domain specific binding)	Mm.440609	TC1637676	ENSMUST00000103154	143.943	58.2383	126.737	179.573	125.52	75.56	70.2715	28.8835
AK171589	0.00598112	0.26248	3.74556	up	AK171589	Cd22	A530093D23,Lyb-8,Lyb8	Mus musculus B6-derived CD11 +ve dendritic cells cDNA, RIKEN full-length enriched library, clone:F730314H24 product:CD22 antigen, full insert sequence.	12483	chr7	31650845	31663356	GO:0006952(defense response);GO:0007155(cell adhesion);GO:0007166(cell surface receptor linked signal transduction)	GO:0005615(extracellular space);GO:0005887(integral to plasma membrane);GO:0009897(external side of plasma membrane);GO:0016020(membrane);GO:0016021(integral to membrane)	GO:0005515(protein binding);GO:0005529(sugar binding);GO:0015026(coreceptor activity)	Mm.260994	TC1581015///NP207203	ENSMUST00000019248	83.7945	22.3679	97.2505	96.8409	57.2922	25.2273	15.3363	26.5402
AK171886	0.0187255	0.345236	2.15006	up	AK171886	Slfn5	AI956840	Mus musculus activated spleen cDNA, RIKEN full-length enriched library, clone:F830017B13 product:schlafen 5, full insert sequence.	327978	chr11	82765603	82772304	GO:0030154(cell differentiation)		GO:0000166(nucleotide binding);GO:0005524(ATP binding)	Mm.42147	TC1584337	ENSMUST00000067443	81.1372	37.2835	102.937	58.683	81.7911	33.7721	31.8173	46.261
AK172128	0.0196545	0.34672	8.49405	up	AK172128	Gm1966	-	Mus musculus activated spleen cDNA, RIKEN full-length enriched library, clone:F830043H18 product:hypothetical protein, full insert sequence.	434223	chr7	113744756	113788159	GO:0008152(metabolic process)		GO:0016740(transferase activity)	Mm.334112	TC1590001///TC1710885		239.154	23.3327	491.838	118.994	106.631	24.9552	12.5637	32.4791
AK172685	0.00710689	0.27207	3.77235	up	AK172685	Slc43a2	7630402D21Rik,BC042513,Lat4,MGC28931	Mus musculus activated spleen cDNA, RIKEN full-length enriched library, clone:F830228N11 product:weakly similar to PB39 (Prostate cancer OVEREXPRESSED gene 1) [Homo sapiens], full insert sequence.	215113	chr11	75345639	75382756	GO:0015807(L-amino acid transport)	GO:0005886(plasma membrane)	GO:0015179(L-amino acid transporter activity)	Mm.11186	TC1600749	ENSMUST00000042561	134.583	37.2133	146.701	104.05	152.997	55.6241	26.4751	29.5408
AK217856	0.0349629	0.394077	2.45359	up	AK217856	N/A	N/A	Mus musculus cDNA, clone:Y2G0143E03, strand:unspecified.	N/A	chr11	119330348	119334837							121.295	49.377	163.55	119.544	80.7897	66.5119	48.4009	33.2181
AY007702	0.0428125	0.415571	2.77168	up	AY007702	Pde7a	AU015378,AW047537	Mus musculus cAMP phosphodiesterase 7A1 mRNA, complete cds.	18583	chr3	19125917	19211322	GO:0007165(signal transduction)	GO:0005615(extracellular space)	GO:0003824(catalytic activity);GO:0004114(3',5'-cyclic-nucleotide phosphodiesterase activity);GO:0016787(hydrolase activity)	Mm.296814	TC1638538///TC1579101	ENSMUST00000099195	272.619	87.8553	165.119	180.842	471.896	88.9942	100.799	73.7726
AY029599	0.00408663	0.253022	2.01013	up	AY029599	Eri3	PINT1,Prnpip1	Mus musculus prion interactor PINT1 mRNA, partial cds.	140546	chr4	117255204	117288187	GO:0008150(biological_process)	GO:0005622(intracellular);GO:0005886(plasma membrane)	GO:0004527(exonuclease activity);GO:0005515(protein binding)	Mm.235891	TC1709801///TC1708130	ENSMUST00000037127	169.478	84.1547	159.153	149.292	199.988	97.5199	75.7994	79.1447
AY037785	0.00847063	0.280696	3.31214	up	AY037785	B3gnt3	2210008L19Rik	Mus musculus beta1,3 N-acetylglucosaminyltransferase-3 (B3gnt3) mRNA, complete cds.	72297	chr8	74215617	74227433	GO:0006486(protein amino acid glycosylation)	GO:0005615(extracellular space);GO:0016020(membrane);GO:0016021(integral to membrane)	GO:0008378(galactosyltransferase activity);GO:0016740(transferase activity);GO:0016757(transferase activity, transferring glycosyl groups)	Mm.290837	TC1583281	ENSMUST00000034260	155.299	46.0465	175.832	100.072	189.994	54.5411	49.56	34.0383
AY049076	0.00133843	0.1969	2.12225	up	AY049076	Slc26a6	B930010B04Rik,CFEX,Pat1	Mus musculus anion exchanger SLC26A6a mRNA, complete cds.	171429	chr9	108756367	108764474	GO:0006810(transport);GO:0006821(chloride transport);GO:0008272(sulfate transport);GO:0015701(bicarbonate transport);GO:0015724(formate transport)	GO:0005624(membrane fraction);GO:0005887(integral to plasma membrane);GO:0016020(membrane)	GO:0005215(transporter activity);GO:0008271(sulfate porter activity);GO:0015108(chloride transporter activity);GO:0015380(anion exchanger activity);GO:0015499(formate transporter activity)	Mm.45201	TC1604076	ENSMUST00000085007	448.215	210.932	389.94	457.6	497.106	228.193	186.195	218.408
AY183125	0.0123862	0.310081	2.12383	up	AY183125	Arhgap4	A130009C12Rik,A530015A20Rik,MGC124367,MGC124368,c1,mKIAA0131	Mus musculus Rho GTPase-activating protein p115 splice form 2 (Arhgap4) mRNA, complete sequence	171207	chrX	71139696	71156568	GO:0007165(signal transduction);GO:0008150(biological_process);GO:0051301(cell division)	GO:0005575(cellular_component);GO:0005622(intracellular)	GO:0003674(molecular_function);GO:0003743(translation initiation factor activity)	Mm.246654	NP1219643	ENSMUST00000064376	856.43	410.579	746.697	970.72	851.873	508.184	425.411	298.142
AY225160	0.0214337	0.351353	2.16218	up	AY225160	Irf1	AU020929,Irf-1	Mus musculus truncated interferon regulatory factor 1 splice variant (Irf1) mRNA, complete cds.	16362	chr11	53583579	53590825	GO:0006350(transcription);GO:0006355(regulation of transcription, DNA-dependent);GO:0006955(immune response);GO:0045084(positive regulation of interleukin-12 biosynthetic process);GO:0045893(positive regulation of transcription, DNA-dependent)	GO:0005634(nucleus)	GO:0003677(DNA binding);GO:0003700(transcription factor activity)	Mm.105218	NP921465///TC1572848	ENSMUST00000019043	426.985	202.933	376.646	503.388	400.922	137.495	264.613	206.692
AY324400	0.0369168	0.400071	5.82277	up	AY324400	N/A	N/A	Mus musculus clone TXA51 T-cell receptor alpha chain mRNA, complete cds.	N/A	chr14	54362786	54363381							187.031	25.5911	48.7329	219.039	293.32	23.3676	20.8434	32.5622
AY769436	0.0173891	0.341012	2.79317	up	AY769436	Mier1	4933425I22Rik,5830411K19Rik,MGC107532,mKIAA1610	Mus musculus mesoderm induction early response 1 N2 beta (Mier1) mRNA, complete cds.	71148	chr4	102788164	102838354	GO:0006350(transcription);GO:0006355(regulation of transcription, DNA-dependent)	GO:0005634(nucleus)	GO:0003677(DNA binding)	Mm.288721	TC1582274///TC1592459///TC1616943	ENSMUST00000030247	153.098	55.3108	156.719	194.388	108.186	59.4512	70.2884	36.1929
BC001986	0.0033322	0.246102	3.05253	up	BC001986	Ifi47	47kDa,IRG-47,Iigp4,Iipg4,Irgd,Olfr56	Mus musculus interferon gamma inducible protein 47, mRNA (cDNA clone MGC:5665 IMAGE:3589815), complete cds.	15953	chr11	48900551	48910473	GO:0006952(defense response)	GO:0005783(endoplasmic reticulum)		Mm.24769	TC1576386	ENSMUST00000046704	358.772	115.194	463.522	347.873	264.92	106.097	133.27	106.216
BC002035	0.0140477	0.323467	14.5328	up	BC002035	N/A	N/A	Mus musculus cDNA clone MGC:5947 IMAGE:3491358, complete cds.	N/A	chr6	68071047	68071818							1174.24	63.1711	2435.3	755.928	331.487	98.163	37.8744	53.4759
BC002074	0.0326337	0.389993	2.79791	up	BC002074	Ass1	AA408052,ASS,Ass-1,MGC103151	Mus musculus argininosuccinate synthetase 1, mRNA (cDNA clone MGC:6218 IMAGE:3491910), complete cds.	11898	chr2	31325789	31376190	GO:0000050(urea cycle);GO:0006526(arginine biosynthetic process);GO:0008652(amino acid biosynthetic process)	GO:0005739(mitochondrion)	GO:0000166(nucleotide binding);GO:0004055(argininosuccinate synthase activity);GO:0005524(ATP binding);GO:0016874(ligase activity)	Mm.3217	TC1781407	ENSMUST00000102840	289.583	94.6238	430.116	292.482	146.15	85.488	103.637	94.7467
BC002082	3.83158e-05	0.128519	6.42724	up	BC002082	Fabp3	Fabph-1,Fabph-4,Fabph1,Fabph4,H-FABP,Mdgi	Mus musculus fatty acid binding protein 3, muscle and heart, mRNA (cDNA clone MGC:6249 IMAGE:3485639), complete cds.	14077	chr4	129985991	129992703	GO:0006656(phosphatidylcholine biosynthetic process);GO:0006810(transport)		GO:0005488(binding);GO:0008289(lipid binding)	Mm.388886	TC1737364	ENSMUST00000070532	648.6	100.828	614.726	740.26	590.816	113.826	95.6436	93.0136
BC002136	0.028017	0.374223	6.13336	up	BC002136	Coro1a	Clabp,Lmb3,TACO,p57	Mus musculus coronin, actin binding protein 1A, mRNA (cDNA clone MGC:7245 IMAGE:3484185), complete cds.	12721	chr7	133843287	133848250			GO:0003779(actin binding)	Mm.290482	TC1695543///TC1573127	ENSMUST00000032949	979.823	131.502	279.698	1292.68	1367.09	118.036	169.208	107.262
BC003215	0.0107939	0.296619	5.35925	up	BC003215	Cdc20	2310042N09Rik,C87100,p55CDC	Mus musculus cell division cycle 20 homolog (S. cerevisiae), mRNA (cDNA clone MGC:7111 IMAGE:3157842), complete cds.	107995	chr4	118105505	118109885	GO:0006512(ubiquitin cycle);GO:0007049(cell cycle);GO:0007067(mitosis);GO:0051301(cell division)		GO:0005515(protein binding)	Mm.289747	TC1765009	ENSMUST00000006565	223.981	41.1489	144.995	356.282	170.667	62.6723	27.3115	33.4629
BC003261	0.0467702	0.423982	2.866	up	BC003261	Aurkb	AIM-1,AIRK2,AL022959,Aik2,Aim1,Ark2,AurB,IPL1,STK-1,Stk12,Stk5	Mus musculus aurora kinase B, mRNA (cDNA clone MGC:5803 IMAGE:3501444), complete cds.	20877	chr11	68859163	68865166	GO:0006306(DNA methylation);GO:0006468(protein amino acid phosphorylation);GO:0007049(cell cycle);GO:0007067(mitosis);GO:0051301(cell division)	GO:0000775(chromosome, pericentric region);GO:0005634(nucleus);GO:0005694(chromosome)	GO:0000166(nucleotide binding);GO:0003677(DNA binding);GO:0004672(protein kinase activity);GO:0004674(protein serine/threonine kinase activity);GO:0005515(protein binding);GO:0005524(ATP binding);GO:0008170(N-methyltransferase activity);GO:0016301(kinase activity);GO:0016740(transferase activity)	Mm.3488	TC1576436	ENSMUST00000021277	118.203	38.3436	68.2563	197.394	88.9577	49.3214	39.7221	25.9874
BC003780	0.00404707	0.253022	2.44315	up	BC003780	Chi3l1	AW208766,Brp39,Gp39	Mus musculus chitinase 3-like 1, mRNA (cDNA clone MGC:6002 IMAGE:3601796), complete cds.	12654	chr1	136079044	136086608	GO:0005975(carbohydrate metabolic process);GO:0006032(chitin catabolic process)	GO:0005615(extracellular space)	GO:0003824(catalytic activity);GO:0004553(hydrolase activity, hydrolyzing O-glycosyl compounds);GO:0004568(chitinase activity);GO:0043169(cation binding)	Mm.38274	TC1577153	ENSMUST00000082060	3468.96	1436.95	3225.43	3969.74	3211.71	1577.81	1649.65	1083.4
BC003796	0.000188426	0.147766	2.18159	up	BC003796	Lsp1	Lsp-1,WP34,p50,pp52	Mus musculus lymphocyte specific 1, mRNA (cDNA clone MGC:6047 IMAGE:3488528), complete cds.	16985	chr7	149657747	149680504	GO:0006915(apoptosis);GO:0006935(chemotaxis);GO:0006936(muscle contraction);GO:0006952(defense response);GO:0007010(cytoskeleton organization and biogenesis);GO:0007165(signal transduction)		GO:0003779(actin binding);GO:0004871(signal transducer activity);GO:0005516(calmodulin binding);GO:0017022(myosin binding)	Mm.234003	TC1594075	ENSMUST00000038946	768.628	352.722	761.21	817.964	726.711	343.445	385.95	328.772
BC005455	0.0019082	0.216668	9.7533	up	BC005455	Rac2	AI323801,AI452260	Mus musculus RAS-related C3 botulinum substrate 2, mRNA (cDNA clone MGC:6255 IMAGE:3495818), complete cds.	19354	chr15	78391273	78403129	GO:0006935(chemotaxis);GO:0007264(small GTPase mediated signal transduction);GO:0008284(positive regulation of cell proliferation);GO:0030031(cell projection biogenesis);GO:0030036(actin cytoskeleton organization and biogenesis)	GO:0005622(intracellular);GO:0005624(membrane fraction);GO:0005635(nuclear envelope);GO:0005737(cytoplasm)	GO:0000166(nucleotide binding);GO:0003924(GTPase activity);GO:0005515(protein binding);GO:0005525(GTP binding)	Mm.1972	TC1576323	ENSMUST00000043214	310.73	32.3754	201.106	322.919	408.165	48.2261	22.1255	26.7747
BC006643	0.0459816	0.422796	6.34115	up	BC006643	N/A	N/A	Mus musculus cDNA clone MGC:6582 IMAGE:3483797, complete cds.	N/A	chr6	70557908	70676960							904.139	98.6559	2031.56	260.573	420.283	69.262	129.192	97.5134
BC008989	0.00133236	0.1969	2.6212	up	BC008989	Nr1d1	A530070C09Rik,R75201	Mus musculus nuclear receptor subfamily 1, group D, member 1, mRNA (cDNA clone MGC:6402 IMAGE:3585478), complete cds.	217166	chr11	98629245	98636136	GO:0006350(transcription);GO:0006355(regulation of transcription, DNA-dependent);GO:0007623(circadian rhythm)	GO:0005634(nucleus)	GO:0003677(DNA binding);GO:0003700(transcription factor activity);GO:0004872(receptor activity);GO:0008270(zinc ion binding);GO:0046872(metal ion binding)	Mm.390397	TC1579611///TC1601718///TC1696370	ENSMUST00000064941	4168.88	1590.46	4161.99	4785.1	3559.54	1564	1838.21	1369.16
BC009090	0.0429237	0.415571	2.34226	up	BC009090	Tnfaip8	AA987150,E130304C20Rik,Gg2-1,Nded,Ssc-2	Mus musculus tumor necrosis factor, alpha-induced protein 8, mRNA (cDNA clone MGC:11714 IMAGE:3965693), complete cds.	106869	chr18	50213173	50251433	GO:0006915(apoptosis)			Mm.27740	TC1576267		272.135	122.688	331.916	272.935	211.553	95.6512	81.8026	190.609
BC010302	0.0345952	0.393005	3.94342	up	BC010302	Nek2	AA617254,C77054	Mus musculus NIMA (never in mitosis gene a)-related expressed kinase 2, mRNA (cDNA clone MGC:11846 IMAGE:3597227), complete cds.	18005	chr1	193645451	193656928	GO:0000070(mitotic sister chromatid segregation);GO:0006468(protein amino acid phosphorylation);GO:0007049(cell cycle);GO:0007067(mitosis);GO:0007126(meiosis);GO:0051301(cell division)	GO:0000794(condensed nuclear chromosome);GO:0000922(spindle pole);GO:0005634(nucleus);GO:0030496(midbody)	GO:0000166(nucleotide binding);GO:0000287(magnesium ion binding);GO:0004672(protein kinase activity);GO:0004674(protein serine/threonine kinase activity);GO:0005515(protein binding);GO:0005524(ATP binding);GO:0016301(kinase activity);GO:0016740(transferase activity);GO:0046872(metal ion binding)	Mm.33773	TC1586787	ENSMUST00000027931	181.457	47.0192	204.061	248.14	92.1716	34.6479	28.0232	78.3864
BC010489	0.0101207	0.292303	3.92735	up	BC010489	Sept6	2810035H17Rik,C920001C06Rik,KIAA0128,Sep6,mKIAA0128	Mus musculus septin 6, mRNA (cDNA clone MGC:19033 IMAGE:4168214), complete cds.	56526	chrX	34453440	34529452	GO:0007049(cell cycle);GO:0051301(cell division)		GO:0000166(nucleotide binding);GO:0005525(GTP binding)	Mm.260036	TC1575991///TC1720149///TC1582482	ENSMUST00000053456///ENSMUST00000060474	278.574	76.9226	307.312	267.624	260.786	72.1314	42.1336	116.503
BC010588	0.00136544	0.1969	2.42385	up	BC010588	Ets1	AI196000,AI448617,D230050P06,Ets-1,MGC130355,MGC18571,Tpl1	Mus musculus E26 avian leukemia oncogene 1, 5' domain, mRNA (cDNA clone MGC:18571 IMAGE:3676286), complete cds.	23871	chr9	32503631	32562627	GO:0000074(regulation of progression through cell cycle);GO:0006350(transcription);GO:0006355(regulation of transcription, DNA-dependent);GO:0006357(regulation of transcription from RNA polymerase II promoter);GO:0009987(cellular process);GO:0045648(positive regulation of erythrocyte differentiation);GO:0045941(positive regulation of transcription)	GO:0005634(nucleus)	GO:0003677(DNA binding);GO:0003700(transcription factor activity);GO:0008134(transcription factor binding)	Mm.292415	TC1720071///TC1579505///TC1618069	ENSMUST00000034534	144.067	58.9506	119.226	169.569	143.405	61.4041	53.679	61.7686
BC011200	0.025113	0.361457	3.20473	up	BC011200	Parvg	AI413459	Mus musculus parvin, gamma, mRNA (cDNA clone MGC:18790 IMAGE:4190510), complete cds.	64099	chr15	84155195	84173371	GO:0007155(cell adhesion)	GO:0005856(cytoskeleton)	GO:0003779(actin binding);GO:0005515(protein binding)	Mm.251356	TC1576950	ENSMUST00000023074	386.157	120.307	237.657	374.081	546.734	176.597	80.6983	103.626
BC011513	9.05708e-05	0.146493	5.27391	up	BC011513	Myb	AI550390,M16449,MGC18531,c-myb	Mus musculus myeloblastosis oncogene, mRNA (cDNA clone MGC:18531 IMAGE:3672769), complete cds.	17863	chr10	20845689	20880686	GO:0000074(regulation of progression through cell cycle);GO:0000082(G1/S transition of mitotic cell cycle);GO:0006350(transcription);GO:0006355(regulation of transcription, DNA-dependent);GO:0006397(mRNA processing);GO:0006816(calcium ion transport);GO:0007049(cell cycle);GO:0008380(RNA splicing);GO:0009987(cellular process);GO:0019068(virus assembly);GO:0045449(regulation of transcription)	GO:0005634(nucleus);GO:0005681(spliceosome)	GO:0003677(DNA binding);GO:0003700(transcription factor activity);GO:0005515(protein binding);GO:0030528(transcription regulator activity)	Mm.52109	TC1628109///TC1578598///TC1596978	ENSMUST00000020158	240.981	45.3666	217.407	217.15	288.385	49.3495	42.5482	44.2021
BC013273	0.040043	0.408064	2.09408	up	BC013273	Ptprcap	AI605264,CD-45-AP,LPAP,LSM-1	Mus musculus protein tyrosine phosphatase, receptor type, C polypeptide-associated protein, mRNA (cDNA clone MGC:13941 IMAGE:4208992), complete cds.	19265	chr19	4154657	4156707	GO:0007185(transmembrane receptor protein tyrosine phosphatase signaling pathway)	GO:0005886(plasma membrane);GO:0016020(membrane);GO:0016021(integral to membrane)	GO:0004725(protein tyrosine phosphatase activity);GO:0004872(receptor activity)	Mm.329686	TC1578498		331.525	149.885	494.833	276.721	223.021	133.205	149.897	166.553
BC013541	0.030608	0.383329	4.49245	up	BC013541	Calml4	2010002G05Rik	Mus musculus calmodulin-like 4, mRNA (cDNA clone MGC:19226 IMAGE:4241711), complete cds.	75600	chr9	62705932	62723724			GO:0005509(calcium ion binding)	Mm.440576	TC1652436	ENSMUST00000034777	184.357	33.3218	78.1906	118.443	356.437	28.9305	37.2563	33.7786
BC013785	0.020393	0.350799	2.52023	up	BC013785	Psmb8	Lmp-7,Lmp7	Mus musculus proteasome (prosome, macropain) subunit, beta type 8 (large multifunctional peptidase 7), mRNA (cDNA clone MGC:6535 IMAGE:2654130), complete cds.	16913	chr17	34335315	34338391	GO:0006511(ubiquitin-dependent protein catabolic process);GO:0006955(immune response);GO:0019882(antigen processing and presentation)	GO:0005634(nucleus);GO:0005829(cytosol);GO:0005839(proteasome core complex (sensu Eukaryota));GO:0043234(protein complex)	GO:0004175(endopeptidase activity);GO:0004298(threonine endopeptidase activity);GO:0008233(peptidase activity);GO:0016787(hydrolase activity)	Mm.180191	TC1574225	ENSMUST00000025196	441.024	179.008	563.935	374.357	384.778	202.269	113.278	221.477
BC013802	0.021008	0.351353	2.08654	up	BC013802	Tap1	ABC17,APT1,Abcb2,Ham-1,Ham1,MTP1,PSF1,RING4,TAP,Tap-1,Y3	Mus musculus transporter 1, ATP-binding cassette, sub-family B (MDR/TAP), mRNA (cDNA clone MGC:18542 IMAGE:3257566), complete cds.	21354	chr17	34325089	34334165	GO:0006810(transport);GO:0006857(oligopeptide transport);GO:0006952(defense response);GO:0006955(immune response);GO:0015031(protein transport)	GO:0005783(endoplasmic reticulum);GO:0005887(integral to plasma membrane);GO:0016020(membrane);GO:0016021(integral to membrane)	GO:0000166(nucleotide binding);GO:0005215(transporter activity);GO:0005515(protein binding);GO:0005524(ATP binding);GO:0015198(oligopeptide transporter activity);GO:0016887(ATPase activity);GO:0017111(nucleoside-triphosphatase activity);GO:0042626(ATPase activity, coupled to transmembrane movement of substances)	Mm.207996	TC1763756	ENSMUST00000041633	312.996	153.782	366.564	270.475	301.949	136.143	209.851	115.351
BC013898	0.0127735	0.31274	2.08491	up	BC013898	Cdkn2d	INK4d,p19,p19INK4d	Mus musculus cyclin-dependent kinase inhibitor 2D (p19, inhibits CDK4), mRNA (cDNA clone MGC:14043 IMAGE:4020283), complete cds.	12581	chr9	21092907	21095463	GO:0006355(regulation of transcription, DNA-dependent);GO:0007049(cell cycle);GO:0007605(sensory perception of sound);GO:0045786(negative regulation of progression through cell cycle)		GO:0003677(DNA binding);GO:0003700(transcription factor activity);GO:0004861(cyclin-dependent protein kinase inhibitor activity);GO:0005515(protein binding);GO:0016301(kinase activity)	Mm.29020	TC1576924	ENSMUST00000086374	207.17	100.916	177.486	206.348	237.676	77.8834	94.8618	130.002
BC014720	0.010299	0.29345	2.08711	up	BC014720	Il2rg	CD132,[g]c,gamma(c),gc	Mus musculus interleukin 2 receptor, gamma chain, mRNA (cDNA clone MGC:25334 IMAGE:4924951), complete cds.	16186	chrX	98459728	98463522		GO:0009897(external side of plasma membrane);GO:0016020(membrane);GO:0016021(integral to membrane)	GO:0004872(receptor activity);GO:0004896(hematopoietin/interferon-class (D200-domain) cytokine receptor activity);GO:0005515(protein binding);GO:0019976(interleukin-2 binding)	Mm.2923	TC1574674	ENSMUST00000033664	470.334	220.837	343.928	488.232	578.842	235.832	226.799	199.882
BC014734	0.0225044	0.352844	3.32282	up	BC014734	Eps8l3	AI504489,Eps8r3	Mus musculus ESP8-like 3, mRNA (cDNA clone MGC:25893 IMAGE:4218079), complete cds.	99662	chr3	107680159	107695813			GO:0005515(protein binding)	Mm.108491	TC1581308		122.361	34.6941	68.355	110.021	188.707	28.4902	46.2107	29.3814
BC015292	0.0286815	0.375632	17.8077	up	BC015292	N/A	N/A	Mus musculus cDNA clone MGC:19136 IMAGE:4216659, complete cds.	N/A	chr6	70673541	70676955							1241.05	38.0154	3138.06	368.705	216.373	56.4065	35.5015	22.1383
BC016636	0.0157852	0.332379	2.3818	up	BC016636	Prr3	4930540G07Rik,Cat56	Mus musculus proline-rich polypeptide 3, mRNA (cDNA clone MGC:6855 IMAGE:2650633), complete cds.	75210	chr17	36109485	36115916			GO:0003676(nucleic acid binding);GO:0008270(zinc ion binding);GO:0046872(metal ion binding)	Mm.40036	TC1577901	ENSMUST00000055454	300.696	126.163	214.493	344.512	343.084	165.484	108.643	104.362
BC017639	0.00487854	0.253472	2.18615	up	BC017639	Atp2a3	SERCA3b,Serca3	Mus musculus ATPase, Ca++ transporting, ubiquitous, mRNA (cDNA clone MGC:28920 IMAGE:4924519), complete cds.	53313	chr11	72774756	72806541	GO:0006810(transport);GO:0006811(ion transport);GO:0006812(cation transport);GO:0006816(calcium ion transport);GO:0008152(metabolic process);GO:0015992(proton transport)	GO:0005783(endoplasmic reticulum);GO:0016020(membrane);GO:0016021(integral to membrane)	GO:0000166(nucleotide binding);GO:0000287(magnesium ion binding);GO:0003824(catalytic activity);GO:0005388(calcium-transporting ATPase activity);GO:0005509(calcium ion binding);GO:0005524(ATP binding);GO:0015662(ATPase activity, coupled to transmembrane movement of ions, phosphorylative mechanism);GO:0016787(hydrolase activity);GO:0016820(hydrolase activity, acting on acid anhydrides, catalyzing …	Mm.6306	TC1577006	ENSMUST00000021142	367.426	167.668	312.564	346.705	443.009	167.949	194.12	140.937
BC018216	0.00230292	0.227726	2.18087	up	BC018216	Slc16a8	Mct3	Mus musculus solute carrier family 16 (monocarboxylic acid transporters), member 8, mRNA (cDNA clone MGC:25469 IMAGE:4481698), complete cds.	57274	chr15	79081445	79085178	GO:0006810(transport);GO:0015711(organic anion transport)	GO:0016020(membrane);GO:0016021(integral to membrane)	GO:0005215(transporter activity);GO:0015293(symporter activity);GO:0015355(monocarboxylate porter activity)	Mm.441697	TC1588143	ENSMUST00000039752	238.233	108.531	275.408	242.761	196.528	119.148	108.037	98.4089
BC018315	0.0294606	0.377618	14.0399	up	BC018315	Igh-6	AI326478,IGHM,Igh-M,Igh6,Igm,MGC107036,MGC107507,muH	Mus musculus immunoglobulin heavy chain 6 (heavy chain of IgM), mRNA (cDNA clone MGC:18788 IMAGE:4189350), complete cds.	16019	chr12	114656768	116323817	GO:0000187(activation of MAPK activity);GO:0016064(immunoglobulin mediated immune response);GO:0019882(antigen processing and presentation);GO:0030890(positive regulation of B cell proliferation);GO:0045022(early endosome to late endosome transport);GO:0045807(positive regulation of endocytosis);GO:0050731(positive regulation of peptidyl-tyrosine phosphorylation);GO:0050853(B cell receptor signal…	GO:0009897(external side of plasma membrane);GO:0016020(membrane);GO:0016021(integral to membrane);GO:0019815(B cell receptor complex);GO:0042571(immunoglobulin complex, circulating);GO:0048471(perinuclear region of cytoplasm)	GO:0003823(antigen binding);GO:0004888(transmembrane receptor activity);GO:0005515(protein binding)	Mm.436922///Mm.342177	NP052075///TC1702511///NP062352	ENSMUST00000103426///ENSMUST00000103389	1419.93	66.6653	3437.22	476.801	345.772	50.6716	35.5015	113.823
BC018356	0.00400131	0.253022	2.75027	up	BC018356	Cyp2a12	-	Mus musculus cytochrome P450, family 2, subfamily a, polypeptide 12, mRNA (cDNA clone MGC:25859 IMAGE:4195640), complete cds.	13085	chr7	27814108	27821834	GO:0006118(electron transport)	GO:0005615(extracellular space);GO:0005783(endoplasmic reticulum);GO:0005792(microsome);GO:0016020(membrane)	GO:0004497(monooxygenase activity);GO:0005506(iron ion binding);GO:0016491(oxidoreductase activity);GO:0016712(oxidoreductase activity, acting on paired donors, with incorporation or reduction of molecular oxygen, reduced flavin or flavoprotein as one donor, and incorporation of one atom of oxygen);GO:0020037(heme binding);GO:0046872(metal ion binding);GO:0050381(unspecific monooxygenase activity)	Mm.20770	TC1580820	ENSMUST00000075552	121.477	43.3222	106.025	160.672	97.7333	49.4293	41.8319	38.7054
BC018455	0.00855661	0.280696	4.17458	up	BC018455	Igh	MGC102661,MGC102662,MGC103226,MGC118125,MGC28019,MGC36307,MGC6486,MGC6522,MGC6529,MGC6628,MGC6740,MGC68276,MGC68378	Mus musculus immunoglobulin heavy chain complex, mRNA (cDNA clone MGC:28036 IMAGE:3666682), complete cds.	111507	chr12	114496930	116048097				Mm.390473///Mm.342177///Mm.430747	TC1707890///NP1489570///TC1586115///NP1216021///NP048004///NP590647	ENSMUST00000103412///ENSMUST00000103505///ENSMUST00000103452///ENSMUST00000103504///ENSMUST00000103501	178.325	42.9574	173.708	240.757	120.509	26.7797	46.7062	55.3862
BC019402	0.0335291	0.391435	5.73762	up	BC019402	Cd37	Tspan26	Mus musculus CD37 antigen, mRNA (cDNA clone MGC:25436 IMAGE:4013070), complete cds.	12493	chr7	52489001	52494210		GO:0005886(plasma membrane);GO:0016020(membrane);GO:0016021(integral to membrane)		Mm.3689	TC1580002	ENSMUST00000098461	531.227	107.99	736.518	567.288	289.876	40.7393	75.9232	207.308
BC019492	0.0180912	0.34373	2.16971	up	BC019492	Tesc	1010001A17Rik,2410011K10Rik,MGC117906,TE-1	Mus musculus tescalcin, mRNA (cDNA clone MGC:28673 IMAGE:4237590), complete cds.	57816	chr5	118477832	118511879	GO:0006883(sodium ion homeostasis)	GO:0001726(ruffle);GO:0005634(nucleus);GO:0005737(cytoplasm);GO:0030027(lamellipodium)	GO:0000287(magnesium ion binding);GO:0005509(calcium ion binding);GO:0005515(protein binding);GO:0019212(phosphatase inhibitor activity)	Mm.273285	TC1633822	ENSMUST00000031304	1703.49	812.621	1728.98	1812.59	1568.89	1029.27	872.692	535.904
BC019793	0.00179318	0.213729	2.14609	up	BC019793	Plbd1	1100001H23Rik	Mus musculus RIKEN cDNA 1100001H23 gene, mRNA (cDNA clone MGC:30303 IMAGE:5133074), complete cds.	66857	chr6	136560590	136610366		GO:0005615(extracellular space)		Mm.3311	TC1579332	ENSMUST00000032336	2581.75	1215.34	2531.71	2633.98	2579.57	1253.84	1402.54	989.631
BC020131	0.000359448	0.157288	4.00112	up	BC020131	Ndc80	2610020P18Rik,AV139730,HEC,HEC1,Kntc2	Mus musculus NDC80 homolog, kinetochore complex component (S. cerevisiae), mRNA (cDNA clone MGC:28069 IMAGE:3709641), complete cds.	67052	chr17	71845441	71876084	GO:0000089(mitotic metaphase);GO:0007049(cell cycle);GO:0007067(mitosis);GO:0051301(cell division)	GO:0000775(chromosome, pericentric region);GO:0005634(nucleus)	GO:0005515(protein binding)	Mm.225956	TC1578485	ENSMUST00000024851	123.545	30.8301	119.479	105.984	145.172	29.7457	26.9669	35.7777
BC021319	0.00736819	0.274018	3.62484	up	BC021319	6720457D02Rik	-	Mus musculus cDNA clone IMAGE:5035411.	77117	chr13	62619424	62659959	GO:0006355(regulation of transcription, DNA-dependent)	GO:0005622(intracellular);GO:0005634(nucleus)	GO:0003676(nucleic acid binding);GO:0008270(zinc ion binding);GO:0046872(metal ion binding)	Mm.445930///Mm.247448	TC1624430///TC1590893		190.936	55.5647	208.149	206.372	158.286	40.9747	41.243	84.4764
BC021750	0.00069836	0.190215	2.84586	up	BC021750	Nrm	2610307M02Rik,AI429796	Mus musculus nurim (nuclear envelope membrane protein), mRNA (cDNA clone MGC:30515 IMAGE:4503599), complete cds.	106582	chr17	35998262	36002345		GO:0005637(nuclear inner membrane);GO:0005652(nuclear lamina)		Mm.390992	TC1580886	ENSMUST00000074259	203.005	71.8373	195.825	223.173	190.017	58.5827	81.0059	75.9232
BC023110	0.0189719	0.345803	2.19344	up	BC023110	Apbb1ip	9930118P07Rik,Prp48	Mus musculus amyloid beta (A4) precursor protein-binding, family B, member 1 interacting protein, mRNA (cDNA clone MGC:28054 IMAGE:3707478), complete cds.	54519	chr2	22629951	22730890	GO:0007165(signal transduction);GO:0007218(neuropeptide signaling pathway)	GO:0005856(cytoskeleton)		Mm.14255	TC1599321///TC1599514	ENSMUST00000014290	275.698	127.235	214.484	288.897	323.712	161.575	91.3439	128.785
BC023187	0.0480902	0.427325	2.99759	up	BC023187	Cdc27	AI452358,APC3,BC023187	Mus musculus cell division cycle 27 homolog (S. cerevisiae), mRNA (cDNA clone IMAGE:4954387), complete cds.	217232	chr11	104381580	104411934	GO:0007091(mitotic metaphase/anaphase transition);GO:0051301(cell division)	GO:0005813(centrosome);GO:0005876(spindle microtubule)	GO:0003674(molecular_function)	Mm.89845	TC1580545///TC1669012		154.834	47.8429	106.15	265.466	92.8844	30.3386	56.6107	56.5795
BC023318	0.0247679	0.358083	2.62188	up	BC023318	Chrnb1	Achr-2,Acrb	Mus musculus cholinergic receptor, nicotinic, beta polypeptide 1 (muscle), mRNA (cDNA clone MGC:28277 IMAGE:4009493), complete cds.	11443	chr11	69597537	69609445	GO:0006810(transport);GO:0006811(ion transport)	GO:0005615(extracellular space);GO:0005794(Golgi apparatus);GO:0005886(plasma membrane);GO:0016020(membrane);GO:0016021(integral to membrane);GO:0045211(postsynaptic membrane)	GO:0004872(receptor activity);GO:0004889(nicotinic acetylcholine-activated cation-selective channel activity);GO:0005216(ion channel activity);GO:0005230(extracellular ligand-gated ion channel activity);GO:0030594(neurotransmitter receptor activity)	Mm.86425	TC1668336	ENSMUST00000045971	76.5775	28.9013	109.32	55.6978	64.7153	37.8354	20.0531	28.8153
BC023359	0.0180373	0.343393	2.15371	up	BC023359	3632451O06Rik	AU067705	Mus musculus RIKEN cDNA 3632451O06 gene, mRNA (cDNA clone MGC:32460 IMAGE:5043946), complete cds.	67419	chr14	50301932	50403027		GO:0016020(membrane);GO:0016021(integral to membrane)		Mm.318710	TC1579768		109.075	49.0658	107.427	144.662	75.135	47.9823	54.6041	44.611
BC024402	0.000544595	0.17617	3.35005	up	BC024402	Ms4a7	9130422I10Rik,A430103C15Rik,CD20l4,CFFMA	Mus musculus membrane-spanning 4-domains, subfamily A, member 7, mRNA (cDNA clone MGC:36243 IMAGE:5035752), complete cds.	109225	chr19	11395883	11410584	GO:0007165(signal transduction)	GO:0016021(integral to membrane)	GO:0004872(receptor activity)	Mm.193094	TC1590323	ENSMUST00000056035	132.573	39.9839	125.989	144.578	127.151	32.4503	47.7206	39.7809
BC024578	0.0434653	0.41712	2.96696	up	BC024578	Ttll13	1700111A04Rik,4921538O11,BC024578	Mus musculus tubulin tyrosine ligase-like family, member 13, mRNA (cDNA clone IMAGE:5059754), with apparent retained intron.	269954	chr7	87391879	87397754	GO:0006464(protein modification process)		GO:0004835(tubulin-tyrosine ligase activity);GO:0016874(ligase activity)	Mm.276780	TC1587023///TC1690996	ENSMUST00000058266	85.0771	30.5722	67.744	116.427	71.0603	14.3703	37.1563	40.1901
BC024812	0.0173018	0.341012	2.08587	up	BC024812	Mbd4	Med1	Mus musculus methyl-CpG binding domain protein 4, mRNA (cDNA clone MGC:36060 IMAGE:5356016), complete cds.	17193	chr6	115792359	115803341	GO:0006281(DNA repair);GO:0006284(base-excision repair);GO:0006306(DNA methylation);GO:0006974(response to DNA damage stimulus);GO:0008630(DNA damage response, signal transduction resulting in induction of apoptosis);GO:0009314(response to radiation)	GO:0000785(chromatin);GO:0005634(nucleus)	GO:0003677(DNA binding);GO:0005515(protein binding);GO:0008170(N-methyltransferase activity);GO:0016787(hydrolase activity)	Mm.259308	TC1581818	ENSMUST00000032469	116.515	55.528	109.518	91.1296	148.899	68.3091	53.3024	44.9726
BC025119	0.0437195	0.41712	4.89611	up	BC025119	Fermt3	C79673,Kindlin-3,MGC36836,MGC38286	Mus musculus cDNA sequence BC032204, mRNA (cDNA clone MGC:36836 IMAGE:4190760), complete cds.	108101	chr19	7073467	7093891	GO:0007155(cell adhesion)	GO:0005856(cytoskeleton)	GO:0005515(protein binding)	Mm.157591	TC1572387	ENSMUST00000040772	474.3	84.0188	154.403	812.03	456.468	61.5703	129.176	61.3097
BC025872	0.0110273	0.299135	3.38063	up	BC025872	Rcsd1	A430105K13Rik,BC025872,MGC32399	Mus musculus RCSD domain containing 1, mRNA (cDNA clone MGC:32399 IMAGE:5037953), complete cds.	226594	chr1	167579075	167638145				Mm.265552	TC1578523///TC1597576		372.181	110.471	467.002	402.884	246.659	82.9686	155.107	93.3378
BC027495	0.0401049	0.408114	4.09383	up	BC027495	Cd52	AI463198,B7,B7-Ag,CAMPATH-1,CLS1,MB7	Mus musculus CD52 antigen, mRNA (cDNA clone MGC:40993 IMAGE:1396480), complete cds.	23833	chr4	133649452	133650938		GO:0005615(extracellular space);GO:0016020(membrane);GO:0016021(integral to membrane)	GO:0048503(GPI anchor binding)	Mm.24130	TC1580218	ENSMUST00000000696	358.639	102.663	464.461	371.07	240.385	195.409	47.4369	65.1421
BC027528	0.0289599	0.376231	13.5819	up	BC027528	Cd3g	Ctg-3,Ctg3,T3g	Mus musculus CD3 antigen, gamma polypeptide, mRNA (cDNA clone MGC:41180 IMAGE:1494674), complete cds.	12502	chr9	44777828	44788445	GO:0006461(protein complex assembly);GO:0007163(establishment and/or maintenance of cell polarity);GO:0007166(cell surface receptor linked signal transduction);GO:0015031(protein transport);GO:0042110(T cell activation);GO:0042981(regulation of apoptosis)	GO:0005887(integral to plasma membrane);GO:0016020(membrane);GO:0016021(integral to membrane);GO:0042105(alpha-beta T cell receptor complex)	GO:0004872(receptor activity);GO:0004888(transmembrane receptor activity);GO:0005515(protein binding);GO:0030159(receptor signaling complex scaffold activity);GO:0042608(T cell receptor binding);GO:0046982(protein heterodimerization activity)	Mm.335106	TC1584247	ENSMUST00000002101	672.863	32.771	95.3493	1161.89	761.351	40.1639	26.4046	31.7446
BC029073	0.00957491	0.289742	2.13124	up	BC029073	Scarb2	9330185J12Rik,Cd36l2,LGP85,LIMP-2,MLGP85	Mus musculus scavenger receptor class B, member 2, mRNA (cDNA clone MGC:11451 IMAGE:3962669), complete cds.	12492	chr5	92873018	92934542	GO:0007155(cell adhesion)	GO:0005764(lysosome);GO:0005886(plasma membrane);GO:0016020(membrane);GO:0016021(integral to membrane)	GO:0004872(receptor activity)	Mm.297964	TC1577821	ENSMUST00000031377	207.543	99.4158	227.403	199.422	195.803	118.793	107.878	71.5763
BC029727	0.0450047	0.42006	3.47874	up	BC029727	Zap70	70kDa,AI327364,Srk,TZK,ZAP-70,mrtle,mur	Mus musculus zeta-chain (TCR) associated protein kinase, mRNA (cDNA clone MGC:36162 IMAGE:4925739), complete cds.	22637	chr1	36818694	36839663	GO:0006468(protein amino acid phosphorylation);GO:0007165(signal transduction);GO:0007242(intracellular signaling cascade);GO:0018108(peptidyl-tyrosine phosphorylation);GO:0043366(beta selection);GO:0045059(positive thymic T cell selection);GO:0045060(negative thymic T cell selection);GO:0045061(thymic T cell selection);GO:0045582(positive regulation of T cell differentiation);GO:0046638(positive…	GO:0005737(cytoplasm);GO:0005829(cytosol);GO:0016020(membrane);GO:0016021(integral to membrane);GO:0042101(T cell receptor complex)	GO:0000166(nucleotide binding);GO:0001784(phosphotyrosine binding);GO:0004672(protein kinase activity);GO:0004713(protein-tyrosine kinase activity);GO:0004715(non-membrane spanning protein tyrosine kinase activity);GO:0004872(receptor activity);GO:0005515(protein binding);GO:0005524(ATP binding);GO:0016301(kinase activity);GO:0016740(transferase activity)	Mm.8038	NP661073	ENSMUST00000027291	165.846	51.7652	130.331	122.094	245.113	23.9845	44.4955	86.8157
BC029813	0.028324	0.374766	2.65305	up	BC029813	Gsdmd	1810036L03Rik,AW558049,DF5L,Dfna5l,Gsdmdc1,M2-4	Mus musculus gasdermin D, mRNA (cDNA clone MGC:36840 IMAGE:4194837), complete cds.	69146	chr15	75692815	75697838				Mm.27385	TC1574219	ENSMUST00000023238	238.174	82.9406	380.606	150.47	183.446	84.6135	72.5108	91.6973
BC031438	0.0430037	0.415687	2.49687	up	BC031438	Extl2	3000001D04Rik,AW146439	Mus musculus exotoses (multiple)-like 2, mRNA (cDNA clone MGC:28403 IMAGE:4024555), complete cds.	58193	chr3	115710402	115731255	GO:0006044(N-acetylglucosamine metabolic process);GO:0019276(UDP-N-acetylgalactosamine metabolic process)	GO:0005615(extracellular space);GO:0005783(endoplasmic reticulum);GO:0016020(membrane);GO:0016021(integral to membrane)	GO:0001888(glucuronyl-galactosyl-proteoglycan 4-alpha-N-acetylglucosaminyltransferase activity);GO:0016740(transferase activity);GO:0016757(transferase activity, transferring glycosyl groups);GO:0030145(manganese ion binding);GO:0035248(alpha-1,4-N-acetylgalactosaminyltransferase activity);GO:0046872(metal ion binding)	Mm.41739	TC1577118	ENSMUST00000029575	177.565	67.7909	97.624	246.779	188.292	87.0705	52.2632	64.039
BC031462	0.0408854	0.410204	2.95526	up	BC031462	Centb1	MGC25782,MGC47358	Mus musculus centaurin, beta 1, mRNA (cDNA clone MGC:25782 IMAGE:4017986), complete cds.	216859	chr11	69695068	69709041	GO:0007242(intracellular signaling cascade);GO:0008150(biological_process);GO:0043087(regulation of GTPase activity)	GO:0005575(cellular_component)	GO:0003674(molecular_function);GO:0004629(phospholipase C activity);GO:0004872(receptor activity);GO:0008270(zinc ion binding);GO:0016301(kinase activity);GO:0046872(metal ion binding)	Mm.288671	TC1605564///TC1577969	ENSMUST00000001631	250.245	74.7697	118.324	413.193	219.218	68.0747	79.6309	76.6034
BC031498	0.0128667	0.312948	27.9436	up	BC031498	N/A	N/A	Mus musculus cDNA clone MGC:27817 IMAGE:3482714, complete cds.	N/A	chr6	70672910	70676960							1742.59	44.951	4095.25	443.39	689.126	23.6144	81.4064	29.8321
BC031763	0.0199726	0.348572	2.80947	up	BC031763	Arhgdib	D4,Gdid4,Ly-GDI	Mus musculus Rho, GDP dissociation inhibitor (GDI) beta, mRNA (cDNA clone MGC:25396 IMAGE:4923219), complete cds.	11857	chr6	136872181	136890190		GO:0005737(cytoplasm)	GO:0005094(Rho GDP-dissociation inhibitor activity);GO:0005096(GTPase activator activity);GO:0005515(protein binding)	Mm.2241	TC1578001	ENSMUST00000032344	838.993	291.448	1218.76	572.824	725.4	264.424	386.416	223.504
BC032149	0.0292078	0.376506	2.05537	up	BC032149	Fyn	AI448320,AW552119,MGC115870	Mus musculus Fyn proto-oncogene, mRNA (cDNA clone MGC:29134 IMAGE:3602546), complete cds.	14360	chr10	39174720	39284151	GO:0001764(neuron migration);GO:0007242(intracellular signaling cascade);GO:0007275(multicellular organismal development);GO:0008360(regulation of cell shape);GO:0018108(peptidyl-tyrosine phosphorylation);GO:0030900(forebrain development);GO:0042552(myelination)		GO:0000166(nucleotide binding);GO:0004672(protein kinase activity);GO:0004713(protein-tyrosine kinase activity);GO:0005515(protein binding);GO:0005524(ATP binding);GO:0015631(tubulin binding);GO:0016301(kinase activity);GO:0016740(transferase activity);GO:0030145(manganese ion binding);GO:0046872(metal ion binding)	Mm.4848			1092.68	511.631	707.843	1127.74	1442.45	552.438	455.774	526.68
BC032922	0.00712853	0.27213	8.4499	up	BC032922	Sla	Slap,Slap-1	Mus musculus src-like adaptor, mRNA (cDNA clone MGC:41214 IMAGE:1430090), complete cds.	20491	chr15	66612425	66644155	GO:0007242(intracellular signaling cascade)			Mm.7601	TC1743862///TC1575593	ENSMUST00000066840	231.948	24.1369	321.802	284.393	89.6486	25.4748	27.5837	19.3523
BC034099	0.0484655	0.427325	3.81381	up	BC034099	Hpdl	A830048M07Rik,BC034099,Gloxd1,MGC31514	Mus musculus 4-hydroxyphenylpyruvate dioxygenase-like, mRNA (cDNA clone MGC:31514 IMAGE:4489103), complete cds.	242642	chr4	116492508	116493928	GO:0009072(aromatic amino acid family metabolic process)		GO:0003868(4-hydroxyphenylpyruvate dioxygenase activity)	Mm.279897	TC1584446		245.794	55.3743	83.83	360.233	293.32	44.8853	71.4429	49.7948
BC034523	0.0158093	0.332379	3.18735	up	BC034523	Relb	MGC143683,MGC143684	Mus musculus avian reticuloendotheliosis viral (v-rel) oncogene related B, mRNA (cDNA clone MGC:25383 IMAGE:4485540), complete cds.	19698	chr7	20191570	20214600	GO:0000074(regulation of progression through cell cycle);GO:0006350(transcription);GO:0006355(regulation of transcription, DNA-dependent);GO:0009987(cellular process);GO:0019882(antigen processing and presentation);GO:0042088(T-helper 1 type immune response);GO:0043011(myeloid dendritic cell differentiation);GO:0045063(T-helper 1 cell differentiation);GO:0045449(regulation of transcription)	GO:0005622(intracellular);GO:0005634(nucleus)	GO:0003677(DNA binding);GO:0003700(transcription factor activity)	Mm.1741	TC1581637	ENSMUST00000049912	140.274	43.2421	159.328	176.604	84.8901	41.1781	57.266	31.2823
BC034847	0.0440347	0.417235	3.09106	up	BC034847	Sh2d2a	Lad,Ribp,TSAd	Mus musculus SH2 domain protein 2A, mRNA (cDNA clone MGC:41076 IMAGE:3327113), complete cds.	27371	chr3	87650944	87656686	GO:0007242(intracellular signaling cascade);GO:0008283(cell proliferation)		GO:0005070(SH3/SH2 adaptor activity);GO:0005515(protein binding)	Mm.86361	TC1595068		263.009	92.8328	180.812	309.05	299.166	86.2525	44.3824	147.864
BC037481	0.0392911	0.405105	3.74045	up	BC037481	Centb1	MGC25782,MGC47358	Mus musculus centaurin, beta 1, mRNA (cDNA clone MGC:47358 IMAGE:4460639), complete cds.	216859	chr11	69695068	69703833	GO:0007242(intracellular signaling cascade);GO:0008150(biological_process);GO:0043087(regulation of GTPase activity)	GO:0005575(cellular_component)	GO:0003674(molecular_function);GO:0004629(phospholipase C activity);GO:0004872(receptor activity);GO:0008270(zinc ion binding);GO:0016301(kinase activity);GO:0046872(metal ion binding)	Mm.288671	TC1605564///TC1577969	ENSMUST00000001631	264.048	63.2327	114.771	229.364	448.009	53.1522	47.7466	88.7992
BC038329	0.0337836	0.391435	2.55942	up	BC038329	S100pbp	4930429A08Rik,AI851343,S100pbpr	Mus musculus S100P binding protein, mRNA (cDNA clone MGC:48235 IMAGE:1548746), complete cds.	74648	chr4	128827977	128866903				Mm.172064	TC1581504	ENSMUST00000049081	94.9786	34.7196	140.272	91.3972	53.2669	28.5461	39.3708	36.242
BC040065	0.000152626	0.147766	2.01474	up	BC040065	Gng11	0610037B21Rik	Mus musculus guanine nucleotide binding protein (G protein), gamma 11, mRNA (cDNA clone MGC:46797 IMAGE:4486523), complete cds.	66066	chr6	3954308	3958445	GO:0007165(signal transduction);GO:0007186(G-protein coupled receptor protein signaling pathway)	GO:0005834(heterotrimeric G-protein complex);GO:0016020(membrane)	GO:0003924(GTPase activity);GO:0004871(signal transducer activity)	Mm.25547	TC1579680	ENSMUST00000031670	7239.17	3585.5	6556.95	7591.79	7568.76	3592.51	3664.83	3499.16
BC042497	0.0463064	0.422796	2.35638	up	BC042497	Dll4	Delta4	Mus musculus delta-like 4 (Drosophila), mRNA (cDNA clone MGC:28345 IMAGE:4017786), complete cds.	54485	chr2	119151564	119161400	GO:0001525(angiogenesis);GO:0007154(cell communication);GO:0007219(Notch signaling pathway);GO:0007275(multicellular organismal development);GO:0030154(cell differentiation)	GO:0005887(integral to plasma membrane);GO:0016020(membrane);GO:0016021(integral to membrane)	GO:0005112(Notch binding);GO:0005509(calcium ion binding);GO:0005515(protein binding);GO:0020037(heme binding)	Mm.143719	TC1655770	ENSMUST00000102517	199.168	91.6271	194.208	186.982	216.312	48.3382	133.53	93.0136
BC042789	0.0323748	0.388783	3.02204	up	BC042789	BC049987	-	Mus musculus cDNA sequence BC049987, mRNA (cDNA clone IMAGE:4220695).	407815	chr9	44478535	44480321							122.647	45.6433	110.233	124.379	133.329	25.1184	78.0096	33.8018
BC046285	0.0381691	0.402746	2.97265	up	BC046285	Trak1	2310001H13Rik,AI413908,AI467545,hyrt,mKIAA1042	Mus musculus trafficking protein, kinesin binding 1, mRNA (cDNA clone IMAGE:6439375), complete cds.	67095	chr9	121276075	121354226	GO:0006357(regulation of transcription from RNA polymerase II promoter);GO:0006493(protein amino acid O-linked glycosylation);GO:0006605(protein targeting)	GO:0005634(nucleus);GO:0005886(plasma membrane)	GO:0050811(GABA receptor binding)	Mm.305318	NP600699///TC1585045///TC1574644	ENSMUST00000045903///ENSMUST00000098282	78.5105	24.2099	37.2376	83.2254	115.069	27.3737	26.6389	18.6171
BC046624	0.00017269	0.147766	7.90893	up	BC046624	Mns1	AW546487	Mus musculus meiosis-specific nuclear structural protein 1, mRNA (cDNA clone MGC:54738 IMAGE:6314904), complete cds.	17427	chr9	72286422	72306383		GO:0005635(nuclear envelope);GO:0005882(intermediate filament)		Mm.387671	TC1689685		190.479	24.0341	184.621	156.082	230.734	29.0781	22.2671	20.757
BC048394	0.0209089	0.351353	2.28107	up	BC048394	Prr5l	2600010E01Rik,4833411O04Rik,Protor-2,Protor2	Mus musculus RIKEN cDNA 2600010E01 gene, mRNA (cDNA clone MGC:56968 IMAGE:6391924), complete cds.	72446	chr2	101556404	101637774				Mm.24138	TC1582083	ENSMUST00000043845	104.343	47.3223	114.344	85.3912	113.294	67.8109	37.6804	36.4756
BC048608	0.0412794	0.411031	2.7983	up	BC048608	Spaca4	1700008E09Rik,AV043694,Samp14	Mus musculus sperm acrosome associated 4, mRNA (cDNA clone MGC:58677 IMAGE:6742046), complete cds.	69363	chr7	52980476	52981183	GO:0007155(cell adhesion)	GO:0016020(membrane)	GO:0005515(protein binding);GO:0048503(GPI anchor binding)	Mm.45607	TC1587789		98.8777	34.1914	120.241	52.0279	124.364	47.1864	23.8877	31.5
BC049278	0.0225088	0.352844	2.07097	up	BC049278	Isoc2b	0610042E07Rik,AI553388,Isoc2	Mus musculus isochorismatase domain containing 2b, mRNA (cDNA clone MGC:54471 IMAGE:4485022), complete cds.	67441	chr7	4796560	4817768	GO:0008152(metabolic process)	GO:0005739(mitochondrion)	GO:0003824(catalytic activity)	Mm.441996	TC1582355	ENSMUST00000064547	128.646	64.7044	123.671	132.835	129.433	90.7297	57.4823	45.9012
BC049774	0.021831	0.352113	3.31692	up	BC049774	Fzd2	AL033370,AW456835,Fz10,Fzd10,Mfz10,Mfz10a	Mus musculus frizzled homolog 2 (Drosophila), mRNA (cDNA clone MGC:59284 IMAGE:6517721), complete cds.	57265	chr11	102465846	102469368	GO:0007165(signal transduction);GO:0007166(cell surface receptor linked signal transduction);GO:0007186(G-protein coupled receptor protein signaling pathway);GO:0007267(cell-cell signaling);GO:0007275(multicellular organismal development);GO:0016055(Wnt receptor signaling pathway);GO:0030855(epithelial cell differentiation)	GO:0005615(extracellular space);GO:0016020(membrane);GO:0016021(integral to membrane)	GO:0004871(signal transducer activity);GO:0004872(receptor activity);GO:0004926(non-G-protein coupled 7TM receptor activity);GO:0004930(G-protein coupled receptor activity);GO:0005515(protein binding)	Mm.36416	TC1638294///TC1582930	ENSMUST00000057893	109.321	32.2073	62.6892	153.056	112.216	23.8306	45.6979	27.0935
BC049928	0.0465465	0.423792	3.05399	up	BC049928	Ddx23	3110082M05Rik,4921506D17Rik	Mus musculus DEAD (Asp-Glu-Ala-Asp) box polypeptide 23, mRNA (cDNA clone IMAGE:5321607), complete cds.	74351	chr15	98478427	98493320		GO:0046540(U4/U6 x U5 tri-snRNP complex)	GO:0003676(nucleic acid binding);GO:0005524(ATP binding);GO:0008026(ATP-dependent helicase activity)	Mm.45725	TC1600510///TC1649679	ENSMUST00000003450	213.965	77.6662	200.639	173.627	267.63	110.487	89.359	33.1523
BC050828	0.0309681	0.383329	2.94133	up	BC050828	Ugcg	AU043821,C80537,Epcs21,GlcT-1,Ugcgl	Mus musculus UDP-glucose ceramide glucosyltransferase, mRNA (cDNA clone MGC:59317 IMAGE:6512920), complete cds.	22234	chr4	59202421	59235705	GO:0006679(glucosylceramide biosynthetic process);GO:0006688(glycosphingolipid biosynthetic process);GO:0008544(epidermis development)	GO:0005615(extracellular space);GO:0005624(membrane fraction);GO:0005737(cytoplasm);GO:0005783(endoplasmic reticulum);GO:0016020(membrane);GO:0016021(integral to membrane)	GO:0003674(molecular_function);GO:0008120(ceramide glucosyltransferase activity);GO:0016740(transferase activity);GO:0016757(transferase activity, transferring glycosyl groups)	Mm.198803	TC1574414///TC1780483	ENSMUST00000030074	278.409	97.2777	267.445	191.78	376.003	127.403	110.687	53.7429
BC051092	0.016441	0.335284	5.0055	up	BC051092	Prap1	Upa	Mus musculus proline-rich acidic protein 1, mRNA (cDNA clone MGC:58955 IMAGE:6529097), complete cds.	22264	chr7	147279306	147283102		GO:0005615(extracellular space)		Mm.439707	TC1583825	ENSMUST00000026540	142.876	25.6035	247.174	111.539	69.9155	20.3545	34.6874	21.7685
BC051199	0.0432842	0.416553	2.00771	up	BC051199	Slc15a2	8430408C16Rik,C78862,Pept2	Mus musculus solute carrier family 15 (H+/peptide transporter), member 2, mRNA (cDNA clone IMAGE:1511439), complete cds.	57738	chr16	36771959	36785048	GO:0006810(transport);GO:0006857(oligopeptide transport);GO:0015031(protein transport)	GO:0005624(membrane fraction);GO:0005887(integral to plasma membrane);GO:0016020(membrane);GO:0016021(integral to membrane)	GO:0005215(transporter activity);GO:0015198(oligopeptide transporter activity);GO:0015293(symporter activity);GO:0015334(high affinity oligopeptide transporter activity)	Mm.281804	TC1586368///TC1580860	ENSMUST00000023616	169.248	81.2292	114.034	153.552	240.157	77.3248	97.2949	69.0678
BC051450	0.000796365	0.19433	2.54917	up	BC051450	Psmb8	Lmp-7,Lmp7	Mus musculus proteasome (prosome, macropain) subunit, beta type 8 (large multifunctional peptidase 7), mRNA (cDNA clone MGC:60583 IMAGE:30076739), complete cds.	16913	chr17	34335320	34338393	GO:0006511(ubiquitin-dependent protein catabolic process);GO:0006955(immune response);GO:0019882(antigen processing and presentation)	GO:0005634(nucleus);GO:0005829(cytosol);GO:0005839(proteasome core complex (sensu Eukaryota));GO:0043234(protein complex)	GO:0004175(endopeptidase activity);GO:0004298(threonine endopeptidase activity);GO:0008233(peptidase activity);GO:0016787(hydrolase activity)	Mm.180191	TC1574225	ENSMUST00000025196	413.48	163.45	443.809	396.209	400.423	168.636	134.983	186.731
BC052061	3.19728e-05	0.128519	10.1992	up	BC052061	Aff3	3222402O04Rik,A730046J16,LAF-4,Laf4	Mus musculus AF4/FMR2 family, member 3, mRNA (cDNA clone MGC:62452 IMAGE:5702935), complete cds.	16764	chr1	38236087	38685144							225.058	22.1737	223.068	250.362	201.745	26.1413	21.3702	19.0097
BC052363	0.00490106	0.253472	2.45544	up	BC052363	H1fnt	1700026P10Rik,H1t2,Hanp1,mH1t2	Mus musculus H1 histone family, member N, testis-specific, mRNA (cDNA clone MGC:58824 IMAGE:6773647), complete cds.	70069	chr15	98086416	98087724	GO:0007290(spermatid nuclear elongation);GO:0035092(sperm chromatin condensation)	GO:0000790(nuclear chromatin)	GO:0003677(DNA binding)	Mm.107718	TC1583992		155.883	62.8644	128.35	141.298	198.002	65.8434	52.2632	70.4867
BC052557	0.0435906	0.41712	2.57824	up	BC052557	Arid1b	8030481M12,9330189K18Rik,AI836955,Ardi1b,B230217J03Rik,mKIAA1235	Mus musculus AT rich interactive domain 1B (Swi1 like), mRNA (cDNA clone IMAGE:5257371).	239985	chr17	4995073	5098186	GO:0006306(DNA methylation);GO:0008150(biological_process)	GO:0005575(cellular_component);GO:0005622(intracellular)	GO:0003674(molecular_function);GO:0003677(DNA binding)	Mm.133401	TC1667771///TC1675544		121.63	45.4137	113.53	71.1505	180.211	46.6291	58.4447	31.1672
BC052736	0.0241153	0.356007	3.09446	up	BC052736	Sox4	AA682046,Sox-4	Mus musculus SRY-box containing gene 4, mRNA (cDNA clone MGC:64652 IMAGE:6822618), complete cds.	20677	chr13	29042598	29045551	GO:0006350(transcription);GO:0006355(regulation of transcription, DNA-dependent);GO:0008152(metabolic process);GO:0031017(exocrine pancreas development)	GO:0000785(chromatin);GO:0005634(nucleus);GO:0005667(transcription factor complex)	GO:0003677(DNA binding);GO:0003700(transcription factor activity);GO:0008483(transaminase activity);GO:0016740(transferase activity)	Mm.439761	TC1574054	ENSMUST00000067230	252.747	82.1504	169.148	234.586	354.506	48.8527	105.427	92.1716
BC052854	0.0081748	0.279466	2.66691	up	BC052854	Mmp11	ST3,Stmy3	Mus musculus matrix metallopeptidase 11, mRNA (cDNA clone MGC:60677 IMAGE:30058638), complete cds.	17385	chr10	75385966	75395210	GO:0006508(proteolysis);GO:0030574(collagen catabolic process)	GO:0005578(proteinaceous extracellular matrix);GO:0005615(extracellular space)	GO:0004222(metalloendopeptidase activity);GO:0005509(calcium ion binding);GO:0008233(peptidase activity);GO:0008237(metallopeptidase activity);GO:0008270(zinc ion binding);GO:0016787(hydrolase activity);GO:0046872(metal ion binding)	Mm.4561	TC1659807	ENSMUST00000000924	93.3497	33.8982	130.992	75.1113	73.9464	32.9633	30.1974	38.5338
BC053031	0.0456213	0.422409	2.66669	up	BC053031	Itga3	AA407068,CD49C	Mus musculus integrin alpha 3, mRNA (cDNA clone MGC:62260 IMAGE:6401146), complete cds.	16400	chr11	94905795	94938028	GO:0001764(neuron migration);GO:0007155(cell adhesion);GO:0007229(integrin-mediated signaling pathway);GO:0007342(fusion of sperm to egg plasma membrane);GO:0007613(memory)	GO:0008305(integrin complex);GO:0016020(membrane);GO:0016021(integral to membrane);GO:0016323(basolateral plasma membrane);GO:0019717(synaptosome)	GO:0004872(receptor activity);GO:0005515(protein binding)	Mm.57035	TC1578585	ENSMUST00000001548	272.534	109.951	206.929	291.98	318.692	154.879	54.3523	120.62
BC053409	0.0219727	0.352113	10.9674	up	BC053409	Igh-6	AI326478,IGHM,Igh-M,Igh6,Igm,MGC107036,MGC107507,muH	Mus musculus immunoglobulin heavy chain 6 (heavy chain of IgM), mRNA (cDNA clone MGC:60843 IMAGE:30076516), complete cds.	16019	chr12	114656768	116831787	GO:0000187(activation of MAPK activity);GO:0016064(immunoglobulin mediated immune response);GO:0019882(antigen processing and presentation);GO:0030890(positive regulation of B cell proliferation);GO:0045022(early endosome to late endosome transport);GO:0045807(positive regulation of endocytosis);GO:0050731(positive regulation of peptidyl-tyrosine phosphorylation);GO:0050853(B cell receptor signal…	GO:0009897(external side of plasma membrane);GO:0016020(membrane);GO:0016021(integral to membrane);GO:0019815(B cell receptor complex);GO:0042571(immunoglobulin complex, circulating);GO:0048471(perinuclear region of cytoplasm)	GO:0003823(antigen binding);GO:0004888(transmembrane receptor activity);GO:0005515(protein binding)	Mm.436922///Mm.342177	NP052075///TC1702511///NP062352	ENSMUST00000103426///ENSMUST00000103389	1444.36	98.1462	3221.42	606.467	505.2	136.506	106.44	51.493
BC053731	0.00927223	0.28744	19.7324	up	BC053731	Cd2	LFA-2,Ly-37,Ly37	Mus musculus CD2 antigen, mRNA (cDNA clone MGC:60541 IMAGE:30077134), complete cds.	12481	chr3	101079821	101091833	GO:0001766(lipid raft polarization);GO:0006468(protein amino acid phosphorylation);GO:0006917(induction of apoptosis);GO:0006952(defense response);GO:0007155(cell adhesion);GO:0007166(cell surface receptor linked signal transduction);GO:0016337(cell-cell adhesion);GO:0030101(natural killer cell activation);GO:0042110(T cell activation);GO:0045580(regulation of T cell differentiation)	GO:0005615(extracellular space);GO:0005886(plasma membrane);GO:0005887(integral to plasma membrane);GO:0016020(membrane);GO:0016021(integral to membrane)	GO:0004672(protein kinase activity);GO:0004872(receptor activity);GO:0005515(protein binding);GO:0005524(ATP binding)	Mm.22842	TC1584332	ENSMUST00000029456	833.089	32.4956	1830.18	318.105	350.981	23.2755	52.4089	21.8025
BC055377	0.0138533	0.321766	5.54086	up	BC055377	Ptpn22	70zpep,PEP,Ptpn8	Mus musculus protein tyrosine phosphatase, non-receptor type 22 (lymphoid), mRNA (cDNA clone MGC:60662 IMAGE:30077916), complete cds.	19260	chr3	103664288	103716170	GO:0006470(protein amino acid dephosphorylation);GO:0016311(dephosphorylation);GO:0030217(T cell differentiation);GO:0050852(T cell receptor signaling pathway)		GO:0004721(phosphoprotein phosphatase activity);GO:0004725(protein tyrosine phosphatase activity);GO:0004872(receptor activity);GO:0016787(hydrolase activity);GO:0016791(phosphoric monoester hydrolase activity)	Mm.395	TC1579598	ENSMUST00000029433	185.476	32.5615	196.936	268.529	90.9632	49.7165	26.5236	21.4445
BC055906	0.0061142	0.26248	3.52966	up	BC055906	N/A	N/A	Mus musculus cDNA clone MGC:68296 IMAGE:3491798, complete cds.	N/A	chr6	67846165	67846633							100.327	28.8877	117.913	73.4145	109.654	40.4387	23.7328	22.4917
BC056974	0.0172793	0.340832	4.04614	up	BC056974	Cyfip2	1500004I01Rik,6430511D02Rik,AA930218,AU022376,Pir121,mKIAA1168	Mus musculus cytoplasmic FMR1 interacting protein 2, mRNA (cDNA clone MGC:66804 IMAGE:6831770), complete cds.	76884	chr11	46050401	46125808	GO:0006915(apoptosis);GO:0007155(cell adhesion);GO:0008150(biological_process);GO:0016337(cell-cell adhesion)	GO:0005737(cytoplasm);GO:0019717(synaptosome);GO:0045202(synapse);GO:0048471(perinuclear region of cytoplasm)	GO:0003674(molecular_function);GO:0005515(protein binding)	Mm.154358	TC1588786///TC1769247///TC1644473	ENSMUST00000102791	113.615	29.6603	76.0129	151.412	113.42	48.7813	20.2437	19.956
BC057887	0.000315053	0.150986	2.26366	up	BC057887	B3galt5	1190002B21Rik,AU045265,b3Galt-V	Mus musculus UDP-Gal:betaGlcNAc beta 1,3-galactosyltransferase, polypeptide 5, mRNA (cDNA clone MGC:67946 IMAGE:4983830), complete cds.	93961	chr16	96502638	96541464	GO:0006486(protein amino acid glycosylation)	GO:0005615(extracellular space);GO:0016020(membrane);GO:0016021(integral to membrane)	GO:0008378(galactosyltransferase activity);GO:0016740(transferase activity);GO:0016757(transferase activity, transferring glycosyl groups)	Mm.154783	TC1599247		228.886	101.07	243.759	205.984	236.914	108.785	102.008	92.4171
BC059026	0.0408981	0.410204	2.28072	up	BC059026	Ppp2r5a	MGC38798,PR61alpha	Mus musculus protein phosphatase 2, regulatory subunit B (B56), alpha isoform, mRNA (cDNA clone MGC:69757 IMAGE:6810754), complete cds.	226849	chr1	193175859	193220920	GO:0007165(signal transduction)	GO:0000159(protein phosphatase type 2A complex)	GO:0008601(protein phosphatase type 2A regulator activity)	Mm.205569	TC1682579///TC1673075///TC1685028	ENSMUST00000067976	1087.62	464.962	902.343	767.244	1593.28	543.838	526.038	325.009
BC059857	0.00806862	0.279264	6.43839	up	BC059857	Bai1	B830018M07Rik,KIAA4089,R75078,mKIAA4089	Mus musculus brain-specific angiogenesis inhibitor 1, mRNA (cDNA clone IMAGE:6414704), partial cds.	107831	chr15	74404531	74419894	GO:0007186(G-protein coupled receptor protein signaling pathway);GO:0007218(neuropeptide signaling pathway);GO:0016525(negative regulation of angiogenesis)	GO:0016020(membrane);GO:0016021(integral to membrane)	GO:0004930(G-protein coupled receptor activity);GO:0005515(protein binding);GO:0016527(brain-specific angiogenesis inhibitor activity)	Mm.43133	TC1586610///TC1617539	ENSMUST00000042035	191.943	34.1439	161.352	227.09	187.388	20.2814	61.5369	20.6133
BC060291	0.0320078	0.387866	2.6121	up	BC060291	Ripply3	Dscr6	Mus musculus ripply3 homolog (zebrafish), mRNA (cDNA clone MGC:70097 IMAGE:30135244), complete cds.	170765	chr16	94550070	94558239	GO:0008150(biological_process)	GO:0005575(cellular_component)	GO:0003674(molecular_function)	Mm.42604	TC1584917	ENSMUST00000023660	288.849	106.466	348.061	355.587	162.899	113.405	128.157	77.8345
BC060619	0.0468502	0.423982	4.67505	up	BC060619	Tpx2	2610005B21Rik,DIL2,REPP86,p100	Mus musculus TPX2, microtubule-associated protein homolog (Xenopus laevis), mRNA (cDNA clone MGC:79188 IMAGE:6812536), complete cds.	72119	chr2	152673798	152719754	GO:0051225(spindle assembly)	GO:0005634(nucleus);GO:0005818(aster);GO:0005876(spindle microtubule)	GO:0019901(protein kinase binding)	Mm.407737	TC1572503	ENSMUST00000028969	231.472	53.8383	206.542	118.619	369.257	22.554	39.4486	99.5122
BC060977	0.0406514	0.409906	3.0509	up	BC060977	Cd48	AI449234,AW610730,BCM1,BLAST,BLAST-1,BLAST1,Bcm-1,MEM-102,SLAMF2,Sgp-60	Mus musculus CD48 antigen, mRNA (cDNA clone MGC:74071 IMAGE:30296173), complete cds.	12506	chr1	173612157	173635385		GO:0005615(extracellular space);GO:0005886(plasma membrane);GO:0016020(membrane);GO:0016021(integral to membrane)	GO:0048503(GPI anchor binding)	Mm.1738	TC1577876///TC1639894	ENSMUST00000068584	127.494	37.0875	225.284	73.21	83.9891	34.4111	30.7464	46.1049
BC061067	0.00130466	0.1969	4.28855	up	BC061067	Lipf	2310051B21Rik,AV082900	Mus musculus lipase, gastric, mRNA (cDNA clone MGC:74179 IMAGE:30301084), complete cds.	67717	chr19	34035737	34051299	GO:0006629(lipid metabolic process);GO:0006641(triacylglycerol metabolic process);GO:0016042(lipid catabolic process)	GO:0005575(cellular_component);GO:0005615(extracellular space)	GO:0003824(catalytic activity);GO:0004806(triacylglycerol lipase activity);GO:0008289(lipid binding);GO:0016787(hydrolase activity);GO:0016789(carboxylic ester hydrolase activity)	Mm.329816	TC1735601	ENSMUST00000025680	293.724	69.3935	350.676	280.616	249.88	66.1124	89.2073	52.8608
BC061237	0.0273595	0.371869	6.64587	up	BC061237	BC061237	MGC74390	Mus musculus cDNA sequence BC061237, mRNA (cDNA clone MGC:74390 IMAGE:6705671), complete cds.	385138	chr14	45119792	45126016				Mm.293026	TC1614033	ENSMUST00000096899	315.129	41.6622	128.763	207.727	608.897	55.8418	20.3722	48.7726
BC062940	0.00128536	0.1969	2.08581	up	BC062940	D930015E06Rik	mKIAA0922	Mus musculus RIKEN cDNA D930015E06 gene, mRNA (cDNA clone MGC:86126 IMAGE:6842400), complete cds.	229473	chr3	83702130	83844059				Mm.28838	TC1609430///TC1573046	ENSMUST00000052342	229.976	110.821	231	245.764	213.165	101.887	101.066	129.51
BC063772	0.0274205	0.371916	2.32811	up	BC063772	Pole2	-	Mus musculus polymerase (DNA directed), epsilon 2 (p59 subunit), mRNA (cDNA clone MGC:70176 IMAGE:30147626), complete cds.	18974	chr12	70302761	70329166	GO:0006260(DNA replication)	GO:0005634(nucleus)	GO:0003677(DNA binding);GO:0003887(DNA-directed DNA polymerase activity);GO:0016740(transferase activity);GO:0016779(nucleotidyltransferase activity)	Mm.9199	NP1220738	ENSMUST00000021359	112.194	47.7835	122.797	139.039	74.7459	34.5109	59.9869	48.8527
BC064058	0.00866174	0.280696	2.68729	up	BC064058	Cd28	-	Mus musculus CD28 antigen, mRNA (cDNA clone MGC:73611 IMAGE:3418931), complete cds.	12487	chr1	60803317	60827403	GO:0006955(immune response);GO:0006959(humoral immune response);GO:0008624(induction of apoptosis by extracellular signals);GO:0031295(T cell costimulation);GO:0042089(cytokine biosynthetic process);GO:0042102(positive regulation of T cell proliferation);GO:0045060(negative thymic T cell selection);GO:0045070(positive regulation of viral genome replication);GO:0045086(positive regulation of inter…	GO:0005886(plasma membrane);GO:0005887(integral to plasma membrane);GO:0009897(external side of plasma membrane);GO:0016020(membrane);GO:0016021(integral to membrane)	GO:0015026(coreceptor activity);GO:0042802(identical protein binding)	Mm.255003	TC1622405	ENSMUST00000027165	162.639	59.3107	110.087	185.908	191.921	70.8508	56.6841	50.3973
BC064101	0.0175933	0.342718	2.25493	up	BC064101	AI467606	-	Mus musculus expressed sequence AI467606, mRNA (cDNA clone MGC:73788 IMAGE:1366571), complete cds.	101602	chr7	134234963	134237500		GO:0016020(membrane);GO:0016021(integral to membrane)		Mm.284102	TC1574814	ENSMUST00000056288	240.971	111.051	244.958	251.401	226.553	126.699	135.655	70.7981
BC064116	0.00444483	0.253022	2.52512	up	BC064116	Centb1	MGC25782,MGC47358	Mus musculus centaurin, beta 1, mRNA (cDNA clone IMAGE:3418753).	216859	chr11	69695068	69698192	GO:0007242(intracellular signaling cascade);GO:0008150(biological_process);GO:0043087(regulation of GTPase activity)	GO:0005575(cellular_component)	GO:0003674(molecular_function);GO:0004629(phospholipase C activity);GO:0004872(receptor activity);GO:0008270(zinc ion binding);GO:0016301(kinase activity);GO:0046872(metal ion binding)	Mm.288671	TC1605564///TC1577969	ENSMUST00000001631	113.11	45.8675	109.413	107.87	122.046	38.2491	38.3279	61.0255
BC065791	0.00482723	0.253472	3.72226	up	BC065791	Arl5c	Arl12,BC065791,MGC73657	Mus musculus ADP-ribosylation factor-like 5C, mRNA (cDNA clone MGC:73657 IMAGE:3824354), complete cds.	217151	chr11	97850893	97857487	GO:0007264(small GTPase mediated signal transduction)	GO:0005622(intracellular)	GO:0000166(nucleotide binding);GO:0005525(GTP binding)	Mm.277896	TC1585014///TC1634411	ENSMUST00000042971	187.076	49.0663	140.522	264.682	156.023	43.9556	41.3804	61.8629
BC068313	0.0226582	0.352844	2.44688	up	BC068313	Itga4	CD49D	Mus musculus integrin alpha 4, mRNA (cDNA clone MGC:76683 IMAGE:30093248), complete cds.	16401	chr2	79095801	79170923	GO:0007155(cell adhesion);GO:0007229(integrin-mediated signaling pathway);GO:0007507(heart development);GO:0016477(cell migration)	GO:0008305(integrin complex);GO:0016020(membrane);GO:0016021(integral to membrane)	GO:0004872(receptor activity);GO:0005509(calcium ion binding);GO:0005515(protein binding)	Mm.31903	TC1599227///TC1603835///TC1606677///TC1581627///TC1608639	ENSMUST00000099972	86.2927	35.693	83.2591	111.115	64.5039	24.7251	34.2428	48.111
BC069921	0.00122429	0.1969	2.02424	up	BC069921	Gch1	GTP-CH,GTPCH,Gch	Mus musculus GTP cyclohydrolase 1, mRNA (cDNA clone MGC:78193 IMAGE:6529016), complete cds.	14528	chr14	47775301	47809081	GO:0006729(tetrahydrobiopterin biosynthetic process);GO:0019438(aromatic compound biosynthetic process)	GO:0005737(cytoplasm)	GO:0003824(catalytic activity);GO:0003934(GTP cyclohydrolase I activity);GO:0005515(protein binding);GO:0016787(hydrolase activity)	Mm.10651	TC1579071	ENSMUST00000089959	1496.46	741.182	1490.7	1628.38	1370.29	846.927	704.499	672.122
BC070438	0.0323958	0.388855	2.42171	up	BC070438	Neu4	9330166I04	Mus musculus sialidase 4, mRNA (cDNA clone MGC:91319 IMAGE:6842155), complete cds.	241159	chr1	95917069	95924907	GO:0008150(biological_process);GO:0008152(metabolic process)	GO:0005575(cellular_component);GO:0005764(lysosome);GO:0016020(membrane);GO:0019866(organelle inner membrane)	GO:0004308(exo-alpha-sialidase activity);GO:0016787(hydrolase activity);GO:0016798(hydrolase activity, acting on glycosyl bonds)	Mm.214565	TC1587344	ENSMUST00000050890	118.763	47.4091	88.0508	90.1142	178.123	43.2643	37.3039	61.659
BC072634	0.00883144	0.280696	2.27964	up	BC072634	Tmem151a	AW125688,Gm961,Tmem151	Mus musculus transmembrane protein 151A, mRNA (cDNA clone MGC:99916 IMAGE:6850125), complete cds.	381199	chr19	5079336	5085477		GO:0016020(membrane);GO:0016021(integral to membrane)		Mm.329663	TC1578760	ENSMUST00000077066	95.689	41.7746	113.947	72.9406	100.179	49.8865	41.4386	33.9988
BC080288	0.0452407	0.420883	2.44713	up	BC080288	Scarf1	AA986099,KIAA0149,MGC90792,SREC,SREC-I,mKIAA0149	Mus musculus scavenger receptor class F, member 1, mRNA (cDNA clone MGC:90792 IMAGE:6411836), complete cds.	380713	chr11	75327042	75340066	GO:0016358(dendrite development)		GO:0004872(receptor activity);GO:0005515(protein binding)	Mm.10486	TC1602808	ENSMUST00000042808	85.4158	37.2486	93.8775	67.0693	95.3006	19.8843	53.0322	38.8292
BC080697	0.0236977	0.355999	6.81531	up	BC080697	Cyp27b1	Cp2b,Cyp1,Cyp27b,Cyp40,MGC91184,P450c1,Pddr,Vdd1,Vddr,VddrI,Vdr	Mus musculus cytochrome P450, family 27, subfamily b, polypeptide 1, mRNA (cDNA clone MGC:91184 IMAGE:30470456), complete cds.	13115	chr10	126485305	126490062	GO:0006118(electron transport);GO:0006816(calcium ion transport)	GO:0005739(mitochondrion);GO:0016020(membrane)	GO:0004497(monooxygenase activity);GO:0004498(calcidiol 1-monooxygenase activity);GO:0005506(iron ion binding);GO:0016491(oxidoreductase activity);GO:0020037(heme binding);GO:0046872(metal ion binding)	Mm.6216	TC1598646///TC1590627	ENSMUST00000006907	158.99	18.6106	43.2507	229.246	204.472	20.0477	18.7135	17.0707
BC085186	0.0328843	0.390257	3.68071	up	BC085186	Gpsm3	AA960287,AGS4	Mus musculus G-protein signalling modulator 3 (AGS3-like, C. elegans), mRNA (cDNA clone MGC:109663 IMAGE:30680693), complete cds.	106512	chr17	34726768	34728697	GO:0007165(signal transduction)		GO:0005096(GTPase activator activity)	Mm.26584	TC1581158	ENSMUST00000038325	149.831	38.5885	218.195	161.575	69.7226	32.6782	26.7991	56.2882
BC087556	0.0355924	0.395472	3.14038	up	BC087556	Ass1	AA408052,ASS,Ass-1,MGC103151	Mus musculus argininosuccinate synthetase 1, mRNA (cDNA clone MGC:103151 IMAGE:6478590), complete cds.	11898	chr2	31330227	31376187	GO:0000050(urea cycle);GO:0006526(arginine biosynthetic process);GO:0008652(amino acid biosynthetic process)	GO:0005739(mitochondrion)	GO:0000166(nucleotide binding);GO:0004055(argininosuccinate synthase activity);GO:0005524(ATP binding);GO:0016874(ligase activity)	Mm.3217	TC1781407	ENSMUST00000102840	370.678	105.312	644.128	204.897	263.008	127.422	103.652	84.861
BC089553	0.0413652	0.411411	5.71878	up	BC089553	N/A	N/A	Mus musculus T-cell receptor beta, variable 13, mRNA (cDNA clone MGC:107311 IMAGE:30296425), complete cds.	N/A	chr6	41066005	41498347							280.06	44.3305	92.2734	484.699	263.208	39.8141	22.3066	70.8709
BC090991	0.0346643	0.393245	3.01856	up	BC090991	Gm5797	EG545013	Mus musculus predicted gene, EG545013, mRNA (cDNA clone MGC:107316 IMAGE:6742820), complete cds.	545013	chr14	8156501	8164909							106.476	36.0799	81.6839	82.4023	155.343	19.366	47.8447	41.0291
BC091750	0.0375774	0.402511	15.655	up	BC091750	N/A	N/A	Mus musculus immunoglobulin kappa chain complex, mRNA (cDNA clone MGC:102658 IMAGE:4012790), complete cds.	N/A	chr6	70538594	70676960							1529.42	93.531	3515.05	670.899	402.313	210.888	41.3434	28.3616
BC091754	0.00739868	0.274018	3.31702	up	BC091754	Gm7202	19-23,EG637227,IgK,Igkv6-23	Mus musculus immunoglobulin kappa chain, constant region, mRNA (cDNA clone MGC:103317 IMAGE:4219018), complete cds.	637227	chr6	70165411	70676960							115.464	36.6648	102.506	124.864	119.023	54.0236	24.7417	31.2291
BC092065	0.0286212	0.37554	2.25549	up	BC092065	Igh	MGC102661,MGC102662,MGC103226,MGC118125,MGC28019,MGC36307,MGC6486,MGC6522,MGC6529,MGC6628,MGC6740,MGC68276,MGC68378	Mus musculus immunoglobulin heavy chain complex, mRNA (cDNA clone MGC:102667 IMAGE:4207793), complete cds.	111507	chr12	114496926	114667344				Mm.390473///Mm.342177///Mm.430747	TC1707890///NP1489570///TC1586115///NP1216021///NP048004///NP590647	ENSMUST00000103412///ENSMUST00000103505///ENSMUST00000103452///ENSMUST00000103504///ENSMUST00000103501	64.5238	27.6271	40.4463	84.5957	68.5294	30.3557	30.3289	22.1966
BC096667	0.0110178	0.299135	8.79255	up	BC096667	Igh-6	AI326478,IGHM,Igh-M,Igh6,Igm,MGC107036,MGC107507,muH	Mus musculus immunoglobulin heavy chain 6 (heavy chain of IgM), mRNA (cDNA clone MGC:107036 IMAGE:1515459), complete cds.	16019	chr12	114658951	115974904	GO:0000187(activation of MAPK activity);GO:0016064(immunoglobulin mediated immune response);GO:0019882(antigen processing and presentation);GO:0030890(positive regulation of B cell proliferation);GO:0045022(early endosome to late endosome transport);GO:0045807(positive regulation of endocytosis);GO:0050731(positive regulation of peptidyl-tyrosine phosphorylation);GO:0050853(B cell receptor signal…	GO:0009897(external side of plasma membrane);GO:0016020(membrane);GO:0016021(integral to membrane);GO:0019815(B cell receptor complex);GO:0042571(immunoglobulin complex, circulating);GO:0048471(perinuclear region of cytoplasm)	GO:0003823(antigen binding);GO:0004888(transmembrane receptor activity);GO:0005515(protein binding)	Mm.436922///Mm.342177	NP052075///TC1702511///NP062352	ENSMUST00000103426///ENSMUST00000103389	286.569	28.0588	464.039	295.016	100.652	30.8467	34.0038	19.326
BC096673	6.64836e-05	0.13787	2.62398	up	BC096673	Elovl1	AA407424,BB151133,Ssc1	Mus musculus elongation of very long chain fatty acids (FEN1/Elo2, SUR4/Elo3, yeast)-like 1, mRNA (cDNA clone MGC:106993 IMAGE:5143739), complete cds.	54325	chr4	118100726	118105219	GO:0006633(fatty acid biosynthetic process);GO:0008610(lipid biosynthetic process)	GO:0005783(endoplasmic reticulum);GO:0016020(membrane);GO:0016021(integral to membrane)		Mm.282096	TC1590108	ENSMUST00000102673	14361.4	5488.42	14441.4	13996.5	14646.5	5411.76	6042.67	5010.81
BC099613	0.00824233	0.280696	2.18349	up	BC099613	2610019F03Rik	-	Mus musculus RIKEN cDNA 2610019F03 gene, mRNA (cDNA clone MGC:118662 IMAGE:30031671), complete cds.	72148	chr8	13952009	13974680				Mm.5727	TC1577182	ENSMUST00000062613	577.119	262.931	450.903	589.673	690.779	296.743	278.753	213.296
BC100560	0.00845309	0.280696	8.17257	up	BC100560	Ptprcap	AI605264,CD-45-AP,LPAP,LSM-1	Mus musculus protein tyrosine phosphatase, receptor type, C polypeptide-associated protein, mRNA (cDNA clone MGC:118627 IMAGE:832557), complete cds.	19265	chr19	4154664	4156707	GO:0007185(transmembrane receptor protein tyrosine phosphatase signaling pathway)	GO:0005886(plasma membrane);GO:0016020(membrane);GO:0016021(integral to membrane)	GO:0004725(protein tyrosine phosphatase activity);GO:0004872(receptor activity)	Mm.329686	TC1578498		608.824	84.8267	450.245	810.409	565.816	149.979	66.6814	37.8197
BC104408	0.0141706	0.323687	2.54665	up	BC104408	Fitm1	1110028A07Rik,AV010547,Cg10671,Fit1,MGC129516,MGC129517	Mus musculus RIKEN cDNA 1110028A07 gene, mRNA (cDNA clone MGC:129516 IMAGE:40050546), complete cds.	68680	chr14	56194510	56195789		GO:0005615(extracellular space);GO:0016021(integral to membrane)		Mm.36758	TC1583201	ENSMUST00000022826	141.803	57.1842	127.052	124.667	173.689	77.3322	55.1976	39.0229
BC107006	0.0273469	0.371869	3.79716	up	BC107006	Bco2	B-diox-II,Bcdo2,CMO2,MGC129322,MGC129323	Mus musculus beta-carotene 9', 10'-dioxygenase 2, mRNA (cDNA clone MGC:129322 IMAGE:40046913), complete cds.	170752	chr9	50341451	50358807	GO:0016119(carotene metabolic process);GO:0042573(retinoic acid metabolic process);GO:0042574(retinal metabolic process)	GO:0005622(intracellular)	GO:0005506(iron ion binding);GO:0016491(oxidoreductase activity);GO:0016702(oxidoreductase activity, acting on single donors with incorporation of molecular oxygen, incorporation of two atoms of oxygen)	Mm.390149	TC1641178	ENSMUST00000034569	159.305	44.1068	95.9645	196.29	185.662	40.4862	68.9517	22.8824
BC107386	0.0152365	0.330793	3.65247	up	BC107386	Colq	MGC130387	Mus musculus collagen-like tail subunit (single strand of homotrimer) of asymmetric acetylcholinesterase, mRNA (cDNA clone MGC:130386 IMAGE:40057706), complete cds.	382864	chr14	32337595	32390503							155.139	43.3297	109.607	213.986	141.824	47.4215	57.5554	25.0123
BC107679	0.00862546	0.280696	2.07045	up	BC107679	Tesc	1010001A17Rik,2410011K10Rik,MGC117906,TE-1	Mus musculus tescalcin, mRNA (cDNA clone MGC:117906 IMAGE:5290163), complete cds.	57816	chr5	118477857	118511887	GO:0006883(sodium ion homeostasis)	GO:0001726(ruffle);GO:0005634(nucleus);GO:0005737(cytoplasm);GO:0030027(lamellipodium)	GO:0000287(magnesium ion binding);GO:0005509(calcium ion binding);GO:0005515(protein binding);GO:0019212(phosphatase inhibitor activity)	Mm.273285	TC1633822	ENSMUST00000031304	1413.33	671.769	1614.94	1045.34	1579.71	660.326	740.44	614.542
BC109158	0.0240868	0.355999	2.24959	up	BC109158	Selp	CD62P,Grmp,MGC129336,MGC129337,P-selectin,PADGEM	Mus musculus selectin, platelet, mRNA (cDNA clone MGC:129336 IMAGE:40047544), complete cds.	20344	chr1	166053832	166079199	GO:0006954(inflammatory response);GO:0007155(cell adhesion);GO:0050901(leukocyte tethering or rolling)	GO:0005624(membrane fraction);GO:0016020(membrane);GO:0016021(integral to membrane);GO:0031092(platelet alpha granule membrane)	GO:0005515(protein binding);GO:0005529(sugar binding)	Mm.3337	TC1587977	ENSMUST00000086043	80.6589	36.5617	65.9985	100.208	75.7701	41.2733	44.3824	24.0295
BC109178	0.0105517	0.295789	2.87999	up	BC109178	Rgs10	2310010N19Rik,MGC129414	Mus musculus regulator of G-protein signalling 10, mRNA (cDNA clone MGC:129414 IMAGE:40049527), complete cds.	67865	chr7	135517332	135561671	GO:0009968(negative regulation of signal transduction)		GO:0004871(signal transducer activity);GO:0005515(protein binding)	Mm.18635	TC1578141	ENSMUST00000033133	222.605	79.4816	172.687	243.416	251.712	58.9716	113.01	66.4634
BC115608	0.00587827	0.26248	2.22161	up	BC115608	Ucma	1110017I16Rik,AW121955,Grp	Mus musculus RIKEN cDNA 1110017I16 gene, mRNA (cDNA clone MGC:144507 IMAGE:40102702), complete cds.	68527	chr2	4897264	4906535				Mm.27791	TC1586458	ENSMUST00000027978	140.858	64.2011	127.334	160.16	135.081	64.1754	49.7741	78.6537
BC117091	0.0383303	0.402746	3.09385	up	BC117091	Treml4	5031403H21Rik,BB137214,IDCP1,TLT4,Treml3	Mus musculus triggering receptor expressed on myeloid cells-like 4, mRNA (cDNA clone MGC:151468 IMAGE:40126410), complete cds.	224840	chr17	48403685	48413945		GO:0016021(integral to membrane)	GO:0004872(receptor activity)	Mm.131234	TC1585638	ENSMUST00000059873	119.173	36.0667	107.667	62.0933	187.758	45.2781	24.1359	38.7861
BC117797	0.0165775	0.336067	3.21495	up	BC117797	Il1rl2	AI481289,AW551444,IL-1Rrp2	Mus musculus interleukin 1 receptor-like 2, mRNA (cDNA clone MGC:143689 IMAGE:40092208), complete cds.	107527	chr1	40381474	40422313		GO:0016020(membrane);GO:0016021(integral to membrane)	GO:0004872(receptor activity);GO:0004888(transmembrane receptor activity);GO:0004907(interleukin receptor activity);GO:0004908(interleukin-1 receptor activity);GO:0004909(interleukin-1, Type I, activating receptor activity)	Mm.155583	TC1604310///TC1590842	ENSMUST00000095020	111.828	35.7893	134.818	76.2851	124.381	53.8551	25.7107	27.8022
BC118929	0.0186335	0.345236	4.91066	up	BC118929	Als2cr11	1700052H20Rik	Mus musculus amyotrophic lateral sclerosis 2 (juvenile) chromosome region, candidate 11 (human), mRNA (cDNA clone MGC:143518 IMAGE:40090362), complete cds.	73463	chr1	59107631	59151710				Mm.307436	TC1585163	ENSMUST00000097080	167.847	29.748	67.3833	168.731	267.428	33.0245	31.6687	24.5509
BC120500	0.0144013	0.323955	3.32881	up	BC120500	Def6	2410003F05Rik,6430538D02Rik,AV094905,Ibp,Slat,Slat2,Slat6	Mus musculus differentially expressed in FDCP 6, mRNA (cDNA clone MGC:155737 IMAGE:40129423), complete cds.	23853	chr17	28344722	28365257			GO:0005509(calcium ion binding)	Mm.204731	TC1578800	ENSMUST00000002327	200.366	58.1315	114.683	240.867	245.548	74.8649	45.2583	54.2712
BC127083	0.00285812	0.234804	9.25657	up	BC127083	Prkcb	A130082F03Rik,PKC-Beta,Pkcb,Prkcb1,Prkcb2	Mus musculus protein kinase C, beta 1, mRNA (cDNA clone MGC:150300 IMAGE:40111744), complete cds.	18751	chr7	129432819	129771780	GO:0006468(protein amino acid phosphorylation);GO:0006816(calcium ion transport);GO:0006874(calcium ion homeostasis);GO:0007242(intracellular signaling cascade)	GO:0005634(nucleus);GO:0005737(cytoplasm);GO:0016020(membrane)	GO:0000166(nucleotide binding);GO:0004672(protein kinase activity);GO:0004674(protein serine/threonine kinase activity);GO:0004697(protein kinase C activity);GO:0005246(calcium channel regulator activity);GO:0005509(calcium ion binding);GO:0005515(protein binding);GO:0005524(ATP binding);GO:0008270(zinc ion binding);GO:0016301(kinase activity);GO:0016740(transferase activity);GO:0019992(diacylgly…	Mm.207496	TC1579462///TC1625960	ENSMUST00000064989	363.328	39.0129	329.39	531.155	229.438	42.4196	51.4125	23.2067
BC132049	0.0228708	0.352844	4.36151	up	BC132049	Olfr509	MOR267-14	Mus musculus olfactory receptor 509, mRNA (cDNA clone MGC:163680 IMAGE:40130326), complete cds.	258369	chr7	115789098	115790172	GO:0007165(signal transduction);GO:0007186(G-protein coupled receptor protein signaling pathway);GO:0007608(sensory perception of smell);GO:0050896(response to stimulus)	GO:0016020(membrane);GO:0016021(integral to membrane)	GO:0004871(signal transducer activity);GO:0004872(receptor activity);GO:0004930(G-protein coupled receptor activity);GO:0004984(olfactory receptor activity)	Mm.377461	NP646944	ENSMUST00000061690	142.014	37.1635	102.912	151.991	171.139	20.2165	67.7005	23.5735
BC132328	0.025618	0.363012	2.49194	up	BC132328	Lgals3	GBP,L-34,Mac-2,gal3	Mus musculus lectin, galactose binding, soluble 3, mRNA (cDNA clone MGC:163959 IMAGE:40130605), complete cds.	16854	chr14	47993608	48005763	GO:0001501(skeletal development);GO:0030198(extracellular matrix organization and biogenesis)	GO:0005578(proteinaceous extracellular matrix);GO:0005634(nucleus);GO:0005737(cytoplasm)	GO:0005515(protein binding);GO:0005529(sugar binding);GO:0019863(IgE binding)	Mm.248615	TC1679933	ENSMUST00000022388	91.9999	38.651	72.2735	101.553	102.174	32.3248	57.6009	26.0273
BC132341	0.0263336	0.365904	3.71965	up	BC132341	A430107D22Rik	-	Mus musculus RIKEN cDNA A430107D22 gene, mRNA (cDNA clone MGC:163972 IMAGE:40130618), complete cds.	320484	chr17	32527917	32540481	GO:0051056(regulation of small GTPase mediated signal transduction)	GO:0005622(intracellular)	GO:0005096(GTPase activator activity)	Mm.122284	TC1741917	ENSMUST00000063824	158.669	43.9884	104.53	234.018	137.46	67.8109	23.9887	40.1655
BC132349	0.03559	0.395472	4.87825	up	BC132349	Kcna3	Kca1-3,Kv1.3,Mk-3	Mus musculus potassium voltage-gated channel, shaker-related subfamily, member 3, mRNA (cDNA clone MGC:163980 IMAGE:40130626), complete cds.	16491	chr3	106839242	106840988	GO:0006810(transport);GO:0006811(ion transport);GO:0006813(potassium ion transport)	GO:0005887(integral to plasma membrane);GO:0008076(voltage-gated potassium channel complex);GO:0016020(membrane);GO:0016021(integral to membrane)	GO:0005216(ion channel activity);GO:0005244(voltage-gated ion channel activity);GO:0005249(voltage-gated potassium channel activity);GO:0005267(potassium channel activity);GO:0005515(protein binding);GO:0030955(potassium ion binding)	Mm.30640	TC1651806	ENSMUST00000052718	143.755	24.7967	63.029	283.006	85.229	19.3061	36.4995	18.5844
BC132601	0.0369575	0.400344	2.39081	up	BC132601	Gimap1	IAP38,Imap38,imap	Mus musculus GTPase, IMAP family member 1, mRNA (cDNA clone MGC:164232 IMAGE:40130878), complete cds.	16205	chr6	48689085	48693654		GO:0005783(endoplasmic reticulum);GO:0016020(membrane);GO:0016021(integral to membrane)	GO:0000166(nucleotide binding);GO:0005525(GTP binding)	Mm.252599	TC1595354	ENSMUST00000054368	207.194	92.9834	209.951	221.347	190.283	130.195	98.0837	50.6716
BC134362	0.044478	0.418562	2.43475	up	BC134362	Abpg	C2d,MGC130243,MGC130244,Scgb2b4	Mus musculus androgen binding protein gamma, mRNA (cDNA clone MGC:157491 IMAGE:40134659), complete cds.	110187	chr7	34728118	34730002	GO:0008150(biological_process)	GO:0005576(extracellular region)	GO:0003674(molecular_function)	Mm.155750	TC1587969	ENSMUST00000085623	127.287	54.3258	107.648	104.114	170.099	30.6909	57.707	74.5794
BC140355	0.0405145	0.409732	3.5861	up	BC140355	Il10ra	AW553859,CDw210,Il10r,mIL-10R	Synthetic construct Mus musculus clone IMAGE:100014371, MGC:173378 interleukin 10 receptor, alpha (Il10ra) mRNA, encodes complete protein.	16154	chr9	45063614	45077162	GO:0007166(cell surface receptor linked signal transduction)	GO:0005887(integral to plasma membrane);GO:0016020(membrane);GO:0016021(integral to membrane)	GO:0004872(receptor activity);GO:0004907(interleukin receptor activity);GO:0005515(protein binding)	Mm.379327	TC1578204	ENSMUST00000034594	74.8118	18.0298	84.929	28.0957	111.411	20.6713	17.2858	16.1324
BC145673	0.0147421	0.326636	2.23441	up	BC145673	D14Ertd668e	MGC29273	Mus musculus DNA segment, Chr 14, ERATO Doi 668, expressed, mRNA (cDNA clone MGC:175560 IMAGE:40130976), complete cds.	219132	chr14	59967568	59984280			GO:0005515(protein binding);GO:0008270(zinc ion binding)	Mm.205022	TC1651122		235.517	102.338	167.738	316.877	221.935	116.3	94.655	96.0578
BC146009	0.0360107	0.396348	2.36694	up	BC146009	Hsn2	EG406236	Mus musculus hereditary sensory neuropathy, type II, mRNA (cDNA clone MGC:175896 IMAGE:40131312), complete cds.	406236	chr6	119912325	119913751							80.786	32.368	69.3355	51.2341	121.788	30.0471	39.7207	27.3362
BC146438	0.0134946	0.318434	3.55024	up	BC146438	Tacc1	4833447E04Rik,AA960202,B230378H13Rik	Synthetic construct Mus musculus clone IMAGE:100015105, MGC:180374 transforming, acidic coiled-coil containing protein 1 (Tacc1) mRNA, encodes complete protein.	320165	chr8	26270225	26311758	GO:0007049(cell cycle);GO:0051301(cell division)	GO:0005634(nucleus)	GO:0005515(protein binding)	Mm.308452	TC1620441///TC1599581///TC1608830	ENSMUST00000084030	93.7871	24.4066	81.309	146.317	53.7353	23.5359	28.0232	21.6607
BC150476	0.0441353	0.417463	2.51685	up	BC150476	Olfr905	MOR167-1	Mus musculus olfactory receptor 905, mRNA (cDNA clone MGC:157497 IMAGE:40134740), complete cds.	258800	chr9	38280332	38281266	GO:0007165(signal transduction);GO:0007186(G-protein coupled receptor protein signaling pathway);GO:0007608(sensory perception of smell);GO:0050896(response to stimulus)	GO:0016020(membrane);GO:0016021(integral to membrane)	GO:0004871(signal transducer activity);GO:0004872(receptor activity);GO:0004930(G-protein coupled receptor activity);GO:0004984(olfactory receptor activity)	Mm.377697	NP646788	ENSMUST00000051111	164.622	64.1038	100.964	153.811	239.091	90.7413	47.2309	54.3392
BC152827	0.039284	0.405105	2.53438	up	BC152827	AY761184	CRS1C-3,CRS1C-6	Synthetic construct Mus musculus clone IMAGE:100016071, MGC:184377 cDNA sequence AY761184 (AY761184) mRNA, encodes complete protein.	382000	chr8	22813101	22814075							621.673	236.417	803.903	713.291	347.825	257.143	284.813	167.294
BC156164	0.0293213	0.376953	5.61972	up	BC156164	Enpp7	Alk-SMase,Gm254	Synthetic construct Mus musculus clone IMAGE:100062418, MGC:190874 ectonucleotide pyrophosphatase/phosphodiesterase 7 (Enpp7) mRNA, encodes complete protein.	238011	chr11	118849529	118854153	GO:0006685(sphingomyelin catabolic process);GO:0008152(metabolic process);GO:0009117(nucleotide metabolic process)		GO:0004767(sphingomyelin phosphodiesterase activity);GO:0008252(nucleotidase activity);GO:0016787(hydrolase activity)	Mm.244114		ENSMUST00000092373	230.633	34.157	98.1927	136.017	457.69	34.5815	21.4445	46.4449
BC156697	0.0117669	0.303605	4.2767	up	BC156697	Arhgef6	1600028C08Rik,1700038J06Rik,4930592P22Rik,alpha-PIX	Synthetic construct Mus musculus clone IMAGE:100062134, MGC:190377 Rac/Cdc42 guanine nucleotide exchange factor (GEF) 6 (Arhgef6) mRNA, encodes complete protein.	73341	chrX	54486687	54591680	GO:0007242(intracellular signaling cascade);GO:0008150(biological_process);GO:0035023(regulation of Rho protein signal transduction)	GO:0005575(cellular_component);GO:0005622(intracellular)	GO:0003674(molecular_function);GO:0005085(guanyl-nucleotide exchange factor activity);GO:0005089(Rho guanyl-nucleotide exchange factor activity)	Mm.261443	NP741729///TC1580901///TC1617839///TC1599616	ENSMUST00000033468	163.153	36.8703	141.281	99.5122	248.666	25.4662	50.1471	34.9977
BC156772	0.0305691	0.383329	3.03619	up	BC156772	Sash3	1200013B08Rik,AW413946,SLY1	Synthetic construct Mus musculus clone IMAGE:100062277, MGC:190446 RIKEN cDNA 1200013B08 gene (1200013B08Rik) mRNA, encodes complete protein.	74131	chrX	45499834	45513431				Mm.276131	TC1579818	ENSMUST00000033427	199.647	69.342	253.096	202.806	143.04	73.9657	97.7949	36.2653
CT010321	0.0359832	0.396348	3.24658	up	CT010321	Vav1	Vav,vav-T	Mus musculus full open reading frame cDNA clone RZPDo836D0652D for gene Vav1, Vav 1 oncogene; complete cds, incl. stopcodon.	22324	chr17	57418537	57467376	GO:0000074(regulation of progression through cell cycle);GO:0006909(phagocytosis);GO:0006955(immune response);GO:0007229(integrin-mediated signaling pathway);GO:0007242(intracellular signaling cascade);GO:0030217(T cell differentiation);GO:0035023(regulation of Rho protein signal transduction);GO:0042110(T cell activation);GO:0043087(regulation of GTPase activity);GO:0045785(positive regulation o…	GO:0005622(intracellular)	GO:0005085(guanyl-nucleotide exchange factor activity);GO:0005089(Rho guanyl-nucleotide exchange factor activity);GO:0008270(zinc ion binding);GO:0019992(diacylglycerol binding);GO:0030676(Rac guanyl-nucleotide exchange factor activity);GO:0046872(metal ion binding)	Mm.248172	TC1575273	ENSMUST00000005889	123.947	38.0861	144.255	161.575	66.0116	27.9208	59.0804	27.257
CT010326	0.0130143	0.314469	3.13354	up	CT010326	Cd97	AA409984,TM7LN1	Mus musculus full open reading frame cDNA clone RZPDo836E0352D for gene Cd97, CD97 antigen; complete cds, incl. stopcodon.	26364	chr8	86247263	86265068	GO:0007155(cell adhesion);GO:0007165(signal transduction);GO:0007186(G-protein coupled receptor protein signaling pathway);GO:0007218(neuropeptide signaling pathway)	GO:0005615(extracellular space);GO:0016020(membrane);GO:0016021(integral to membrane)	GO:0004871(signal transducer activity);GO:0004872(receptor activity);GO:0004888(transmembrane receptor activity);GO:0004930(G-protein coupled receptor activity);GO:0005509(calcium ion binding);GO:0005515(protein binding)	Mm.334648	TC1588051	ENSMUST00000075843	401.13	135.311	448.832	344.075	410.482	141.594	186.189	78.1495
DQ133464	0.0342918	0.392226	2.11526	up	DQ133464	Metrn	1810034B16Rik,Hyrac	Mus musculus hypoxia/reoxygenation regulatory factor in astrocytes short transcript variant (Hyrac) mRNA, complete cds.	70083	chr17	25931515	25933990	GO:0007275(multicellular organismal development);GO:0007399(nervous system development);GO:0010001(glial cell differentiation);GO:0030154(cell differentiation);GO:0050772(positive regulation of axonogenesis)	GO:0005615(extracellular space)	GO:0003674(molecular_function)	Mm.41925	TC1623080///NP1479938	ENSMUST00000002344	100.373	48.1702	131.254	86.0822	83.781	38.4378	38.5179	67.555
DQ519369	0.0272927	0.371869	3.10516	up	DQ519369	Art3	4930569O04Rik	alt '4930569O04Rik'	109979	chr5	92760866	92822203	GO:0006471(protein amino acid ADP-ribosylation)	GO:0005615(extracellular space);GO:0016020(membrane)	GO:0003956(NAD(P)+-protein-arginine ADP-ribosyltransferase activity);GO:0016740(transferase activity);GO:0016757(transferase activity, transferring glycosyl groups);GO:0048503(GPI anchor binding)	Mm.263514	NP514132	ENSMUST00000058129	101.753	31.8941	139.918	56.8634	108.478	22.0577	29.8643	43.7603
EF152502	0.0128211	0.31288	3.43557	up	EF152502	Zscan10	BC068284,Zfp206,Zkscan10,Znf206	alt 'BC068284#Zfp206#Zkscan10#Znf206'	332221	chr17	23742471	23747986	GO:0006355(regulation of transcription, DNA-dependent);GO:0008150(biological_process)	GO:0005575(cellular_component);GO:0005622(intracellular);GO:0005634(nucleus)	GO:0003674(molecular_function);GO:0003676(nucleic acid binding);GO:0003700(transcription factor activity);GO:0008270(zinc ion binding);GO:0046872(metal ion binding)	Mm.270315	TC1583438	ENSMUST00000095595	145.018	43.1784	170.459	164.954	99.6417	43.1035	59.4849	26.9468
L29480	0.000720768	0.190215	2.13797	up	L29480	Plk4	1700028H20,AI385771,Sak,Stk18	Mus musculus serine/threonine kinase (sak-b) mRNA, complete cds.	20873	chr3	40603872	40609987	GO:0006468(protein amino acid phosphorylation)		GO:0000166(nucleotide binding);GO:0004672(protein kinase activity);GO:0004674(protein serine/threonine kinase activity);GO:0004713(protein-tyrosine kinase activity);GO:0005515(protein binding);GO:0005524(ATP binding);GO:0016301(kinase activity);GO:0016740(transferase activity)	Mm.3794	NP590451///NP854312///TC1616941	ENSMUST00000026858	98.6413	46.1932	105.927	89.0854	100.911	49.18	40.6122	48.7874
M32380	0.0135427	0.318901	2.7389	up	M32380	N/A	N/A	Mus musculus (clone 3-24) anti-fluorescein antibody (IgH) mRNA, V-region.	N/A	chr12	115693838	115694294							91.7907	33.8095	109.444	100.581	65.3474	46.3694	29.2095	25.8495
M55635	0.0122204	0.309236	4.50263	up	M55635	N/A	N/A	Mus musculus V-alpha 11 and J-alpha TA80 genes, partial cds.	N/A	chr14	53610540	53611063							175.651	39.1911	140.422	121.473	265.059	59.4387	25.6556	32.4791
M89956	0.000167939	0.147766	2.81551	up	M89956	Lsp1	Lsp-1,WP34,p50,pp52	Mus musculus calcium-binding protein (pp52) mRNA, complete cds.	16985	chr7	149646761	149680504	GO:0006915(apoptosis);GO:0006935(chemotaxis);GO:0006936(muscle contraction);GO:0006952(defense response);GO:0007010(cytoskeleton organization and biogenesis);GO:0007165(signal transduction)		GO:0003779(actin binding);GO:0004871(signal transducer activity);GO:0005516(calmodulin binding);GO:0017022(myosin binding)	Mm.234003	TC1594075	ENSMUST00000038946	623.974	220.627	537.496	666.716	667.71	210.171	225.332	226.379
NM_001085518	0.0357846	0.395756	3.36657	up	NM_001085518	Gm14085	OTTMUSG00000015615,Rp23-357i14.1	Mus musculus novel protein similar to solute carrier family 28 (sodium-coupled nucleoside transporter) member 2 (Slc28a2) (Rp23-357i14.1), mRNA.	381417	chr2	122310676	122353776							133.986	40.2932	203.664	113.86	84.4329	59.4512	39.6718	21.7567
NM_001099917	0.0377128	0.402746	2.48231	up	NM_001099917	2210404O07Rik	-	Mus musculus RIKEN cDNA 2210404O07 gene (2210404O07Rik), mRNA.	72273	chr10	80855808	80857824				Mm.253147	TC1648876		113.025	47.4685	143.31	82.5798	113.184	33.047	36.243	73.1155
NM_001105151	0.035423	0.395305	2.19069	up	NM_001105151	Vmn2r47	-	Mus musculus vomeronasal 2, receptor 47 (Vmn2r47), mRNA.	100042891	chr7	8246254	8270798							162.44	72.8003	214.142	106.564	166.614	92.9839	69.2666	56.1503
NM_001109661	0.0118162	0.30427	2.48757	up	NM_001109661	Bach2	E030004N02Rik,MGC117590	Mus musculus BTB and CNC homology 2 (Bach2), transcript variant 1, mRNA.	12014	chr4	32504409	32673083	GO:0006350(transcription);GO:0006355(regulation of transcription, DNA-dependent)	GO:0005634(nucleus)	GO:0003677(DNA binding);GO:0003700(transcription factor activity);GO:0005515(protein binding);GO:0046983(protein dimerization activity)	Mm.441809///Mm.270304	TC1594511///TC1586015	ENSMUST00000037416	294.044	122.791	317.247	297.068	267.817	167.889	117.031	83.4531
NM_001111075	0.0347241	0.393574	3.06057	up	NM_001111075	Cdc25b	AI604853	Mus musculus cell division cycle 25 homolog B (S. pombe) (Cdc25b), transcript variant 2, mRNA.	12531	chr2	131012686	131024233	GO:0000087(M phase of mitotic cell cycle);GO:0001556(oocyte maturation);GO:0006470(protein amino acid dephosphorylation);GO:0007049(cell cycle);GO:0007067(mitosis);GO:0007144(female meiosis I);GO:0045860(positive regulation of protein kinase activity);GO:0051301(cell division)	GO:0005622(intracellular)	GO:0004721(phosphoprotein phosphatase activity);GO:0004725(protein tyrosine phosphatase activity);GO:0016787(hydrolase activity)	Mm.38444	TC1658725///TC1590426	ENSMUST00000028804	226.402	70.7757	256.053	307.062	116.091	47.3715	73.4448	91.5107
U07659	0.0426776	0.415364	2.93458	up	U07659	N/A	N/A	Mus musculus SJL-4E3 T cell receptor alpha chain mRNA, complete cds.	N/A	chr14	54824097	54843439							146.805	51.7833	91.4587	145.519	203.436	83.7892	34.5173	37.0433
U19607	0.00717344	0.273252	6.73761	up	U19607	Txk	A130089B16Rik,Btkl,PTK4,Rlk	Mus musculus tyrosine kinase TXK (txk) mRNA, complete cds.	22165	chr5	73087220	73144012	GO:0006468(protein amino acid phosphorylation);GO:0007242(intracellular signaling cascade)		GO:0000166(nucleotide binding);GO:0004672(protein kinase activity);GO:0004713(protein-tyrosine kinase activity);GO:0005524(ATP binding);GO:0016301(kinase activity);GO:0016740(transferase activity)	Mm.3264	TC1582563///TC1716694	ENSMUST00000006344	240.868	33.431	115.884	255.72	351	37.1252	40.6124	22.5553
U83636	0.025773	0.363081	2.4656	up	U83636	Sp100	A430075G10Rik	alt 'A430075G10Rik'	20684	chr1	87546624	87598145		GO:0005634(nucleus);GO:0005694(chromosome)	GO:0003677(DNA binding)	Mm.290906	TC1712709///TC1619557///TC1712402	ENSMUST00000073378///ENSMUST00000097667	90.3852	38.0351	112.216	83.8958	75.0434	23.6463	52.4669	37.992
V00821	0.024101	0.355999	4.51095	up	V00821	Igh-6	AI326478,IGHM,Igh-M,Igh6,Igm,MGC107036,MGC107507,muH	Mouse mRNA fragment for immunoglobulin mu encoding the C-terminus of the membrane-bound form.	16019	chr12	114656769	114659220	GO:0000187(activation of MAPK activity);GO:0016064(immunoglobulin mediated immune response);GO:0019882(antigen processing and presentation);GO:0030890(positive regulation of B cell proliferation);GO:0045022(early endosome to late endosome transport);GO:0045807(positive regulation of endocytosis);GO:0050731(positive regulation of peptidyl-tyrosine phosphorylation);GO:0050853(B cell receptor signal…	GO:0009897(external side of plasma membrane);GO:0016020(membrane);GO:0016021(integral to membrane);GO:0019815(B cell receptor complex);GO:0042571(immunoglobulin complex, circulating);GO:0048471(perinuclear region of cytoplasm)	GO:0003823(antigen binding);GO:0004888(transmembrane receptor activity);GO:0005515(protein binding)	Mm.436922///Mm.342177	NP052075///TC1702511///NP062352	ENSMUST00000103426///ENSMUST00000103389	209.117	51.5036	291.788	191.891	143.672	92.5513	34.5616	27.3978
X01133	0.0236126	0.355895	6.20344	up	X01133	N/A	N/A	Murine mRNA for T-cell receptor alpha-chain.	N/A	chr14	54805776	54843439							887.056	115.885	261.86	1372.1	1027.21	111.527	109.298	126.83
XM_001000082	0.0054835	0.257652	7.19399	up	XM_001000082	Bin2	-	PREDICTED: Mus musculus bridging integrator 2 (Bin2), mRNA.	668218	chr15	100470387	100499933							263.971	35.2381	405.965	147.264	238.683	23.1536	48.2627	34.2981
XM_001472499	0.0347702	0.393574	3.85819	up	XM_001472499	Gm6121	-	PREDICTED: Mus musculus novel protein similar to Xlr-related, meiosis regulated (Xmr) (LOC619991), mRNA.	619991	chrX	26339873	26362792							181.226	53.6793	179.491	233.196	130.992	25.0672	39.4628	96.5078
XM_001472662	0.0297861	0.378789	2.52041	up	XM_001472662	4933431K14Rik	-	PREDICTED: Mus musculus RIKEN cDNA 4933431K14 gene (4933431K14Rik), mRNA.	71295	chr9	85642684	85644036							188.483	79.9835	156.769	200.182	208.499	58.0661	55.8364	126.048
XM_001473790	0.0203075	0.350592	2.25889	up	XM_001473790	Gm2538	-	PREDICTED: Mus musculus similar to gag polyprotein (LOC100039989), mRNA.	100039989	chr9	11945965	11947920							172.226	79.5237	162.173	169.221	185.285	83.7892	104.305	50.4772
XM_001473934	0.0308449	0.383329	2.41489	up	XM_001473934	Gm2550	-	PREDICTED: Mus musculus hypothetical protein LOC100040006 (LOC100040006), mRNA.	100040006	chr5	149992875	149995866							73.392	30.4792	58.0036	60.3501	101.822	33.278	19.8556	38.304
XM_001474127	0.0497593	0.427956	2.18106	up	XM_001474127	Pisd-ps2	D030013I16Rik	PREDICTED: Mus musculus hypothetical protein LOC100040128 (LOC100040128), mRNA.	328734	chr17	3082300	3084402							390.049	168.802	607.76	286.572	275.816	141.417	206.25	158.739
XM_001474228	0.0372541	0.401053	2.29079	up	XM_001474228	Gm2647	-	PREDICTED: Mus musculus similar to Ubtf protein (LOC100040180), mRNA.	100040180	chr5	151678988	151755230							127.332	56.7627	93.0664	164.676	124.254	82.4173	46.8157	41.055
XM_001474275	0.0165547	0.336067	2.20449	up	XM_001474275	N/A	N/A	PREDICTED: Mus musculus hypothetical protein LOC676764 (LOC676764), mRNA.	N/A	chr2	33321968	33400396							100.522	46.8601	87.0987	110.615	103.853	52.5316	31.3646	56.6841
XM_001474780	0.0307078	0.383329	2.97122	up	XM_001474780	Mbnl1	Mbnl,mKIAA0428	PREDICTED: Mus musculus hypothetical protein LOC100040485 (LOC100040485), mRNA.	56758	chr3	60221144	60333446	GO:0001701(in utero embryonic development);GO:0006376(mRNA splice site selection);GO:0007399(nervous system development);GO:0007517(muscle development);GO:0030326(embryonic limb morphogenesis);GO:0045445(myoblast differentiation)	GO:0005634(nucleus);GO:0005737(cytoplasm)	GO:0003676(nucleic acid binding);GO:0003723(RNA binding);GO:0003725(double-stranded RNA binding);GO:0008270(zinc ion binding);GO:0046872(metal ion binding)	Mm.255723	TC1574313///TC1619330///TC1763144	ENSMUST00000029327	115.945	36.9792	175.308	107.993	64.5352	35.6889	48.1338	27.1149
XM_001475808	0.0187275	0.345236	2.0558	up	XM_001475808	Gm3141	-	PREDICTED: Mus musculus similar to CDNA sequence BC061237 (LOC100041106), mRNA.	100041106	chr14	43824563	43829548							96.5953	45.8762	69.46	126.448	93.8775	42.7338	41.9228	52.972
XM_001476020	0.0393847	0.405543	2.54251	up	XM_001476020	Gm3222	ENSMUSG00000079311	PREDICTED: Mus musculus similar to Glyceraldehyde-3-phosphate dehydrogenase (GAPDH) (LOC100041236), mRNA.	100041236	chr17	14838016	14847271							333.565	129.115	194.662	384.69	421.342	181.159	97.511	108.675
XM_001478378	0.00500409	0.253472	4.28176	up	XM_001478378	Gm3793	-	PREDICTED: Mus musculus hypothetical protein LOC100042327 (LOC100042327), mRNA.	100042327	chr6	56856264	56857045							138.146	31.6492	121.082	196.178	97.177	24.4291	41.5449	28.9736
XM_001478653	0.039917	0.407356	3.70402	up	XM_001478653	Gm3980	-	PREDICTED: Mus musculus similar to OBOX4 (LOC100042707), mRNA.	100042707	chr7	15736262	15738201							109.644	24.8691	96.194	42.4185	190.319	27.1966	23.9396	23.4712
XM_001479222	0.000822052	0.194879	3.15542	up	XM_001479222	Gm4139	-	PREDICTED: Mus musculus hypothetical protein LOC100042974 (LOC100042974), mRNA.	100042974	chr12	26349172	26351671							118.715	37.2622	109.026	100.964	146.156	34.1947	41.5449	36.047
XM_001479735	0.00284064	0.234804	2.93421	up	XM_001479735	Gm4361	-	PREDICTED: Mus musculus hypothetical protein LOC100043325 (LOC100043325), mRNA.	100043325	chr14	54349539	54356015							262.354	87.7624	209.022	343.395	234.644	76.6302	90.1455	96.5115
XM_001479743	0.0357496	0.395591	2.46603	up	XM_001479743	Ccdc88a	A430106J12Rik,AI848406,Ape,C130096N06Rik,C330012F17Rik,D130005J21Rik,Girdin,Giv,Hkrp1	PREDICTED: Mus musculus hypothetical protein LOC100042985 (LOC100042985), mRNA.	108686	chr11	29272329	29274414	GO:0001932(regulation of protein amino acid phosphorylation);GO:0006275(regulation of DNA replication);GO:0016044(membrane organization and biogenesis);GO:0016477(cell migration);GO:0030032(lamellipodium biogenesis);GO:0042127(regulation of cell proliferation)	GO:0005783(endoplasmic reticulum);GO:0005794(Golgi apparatus);GO:0005829(cytosol);GO:0005886(plasma membrane);GO:0030027(lamellipodium);GO:0031410(cytoplasmic vesicle)	GO:0003779(actin binding);GO:0008017(microtubule binding);GO:0035091(phosphoinositide binding);GO:0042803(protein homodimerization activity);GO:0043422(protein kinase B binding)	Mm.441367///Mm.338284	TC1636815///TC1613744///TC1776619///TC1580928///TC1591173///TC1597025	ENSMUST00000040182	204.819	89.174	176.497	202.007	235.953	137.679	76.7691	53.074
XM_001479849	0.0170188	0.337494	2.39751	up	XM_001479849	Mki67	D630048A14Rik,Ki-67,Ki67	PREDICTED: Mus musculus antigen identified by monoclonal antibody Ki 67 (Mki67), mRNA.	17345	chr7	142881466	142908100	GO:0007126(meiosis);GO:0008283(cell proliferation)	GO:0000775(chromosome, pericentric region);GO:0000793(condensed chromosome);GO:0005634(nucleus);GO:0005730(nucleolus);GO:0005737(cytoplasm)		Mm.4078	TC1572202	ENSMUST00000033310	592.402	249.497	628.736	704.357	444.112	286.129	290.906	171.458
XM_001479893	0.00969671	0.28977	2.17128	up	XM_001479893	N/A	N/A	PREDICTED: Mus musculus hypothetical protein LOC100042910 (LOC100042910), mRNA.	N/A	chr2	57088637	57090708							104.192	46.8548	138.795	82.4602	91.3217	47.2308	50.6624	42.6713
XM_001480779	0.0351395	0.394433	2.00044	up	XM_001480779	Gm4552	-	PREDICTED: Mus musculus similar to keratin associated protein 5-5 (LOC100043616), mRNA.	100043616	chr7	149329658	149330508							395.833	196.914	282.838	411.239	493.423	225.839	221.741	143.162
XM_001480815	0.00392389	0.253022	5.18503	up	XM_001480815	Gm4606	-	PREDICTED: Mus musculus hypothetical protein LOC100043721 (LOC100043721), mRNA.	100043721	chr14	73240447	73263362							113.008	21.4303	94.4541	163.779	80.7897	18.1577	16.8779	29.2552
XM_140607	0.0221126	0.352113	2.59295	up	XM_140607	Gm336	-	PREDICTED: Mus musculus gene model 336, (NCBI) (Gm336), mRNA.	240539	chr19	11165058	11166664							109.379	45.2336	100.964	114.344	112.827	30.9515	70.5169	34.2324
XM_147017	0.0490801	0.427659	2.87827	up	XM_147017	Mrap2	BB633055	PREDICTED: Mus musculus similar to Chromosome 6 open reading frame 117 (LOC244958), mRNA.	244958	chr9	87039140	87077666							121.207	41.2594	63.029	153.52	147.074	46.0808	24.2181	53.4794
XM_193558	0.0214162	0.351353	2.25896	up	XM_193558	Rnf217	AU016819,Ibrdc1	PREDICTED: Mus musculus IBR domain containing 1 (Ibrdc1), mRNA.	268291	chr10	31221690	31330718			GO:0005515(protein binding);GO:0008270(zinc ion binding)	Mm.295212	NP1284982///TC1652627	ENSMUST00000081989	104.563	48.6524	103.155	103.292	107.244	69.7787	32.5968	43.5817
XM_357688	0.0196437	0.34672	3.53583	up	XM_357688	V1rd5	Gm1422,Gm403	PREDICTED: Mus musculus vomeronasal 1 receptor, D5 (V1rd5), mRNA.	384522	chr7	5098091	5101145							255.524	66.5523	137.2	224.408	404.964	54.5307	62.9207	82.2054
XM_485921	0.0196991	0.347271	6.05312	up	XM_485921	Gm5593	EG434175	PREDICTED: Mus musculus predicted gene, EG434175, transcript variant 1 (EG434175), mRNA.	434175	chr7	49361142	49362686							244.697	45.2494	157.029	207.15	369.911	25.3871	85.3113	25.0498
XM_980102	0.0327837	0.389993	2.11425	up	XM_980102	Thap6	4930534K21Rik,AI448650	PREDICTED: Mus musculus THAP domain containing 6 (Thap6), mRNA.	381650	chr5	92391907	92401163				Mm.392636///Mm.159453	TC1598599	ENSMUST00000094611	160.727	72.698	216.761	100.359	165.061	75.3962	64.1781	78.5196
XM_981618	0.0333647	0.391341	2.33906	up	XM_981618	Gm7929	EG666099	PREDICTED: Mus musculus predicted gene, EG666099 (EG666099), mRNA.	666099	chr14	42042755	42078395							667.855	270.436	379.132	865.975	758.458	284.291	295.008	232.009
XM_982666	0.0245449	0.357054	6.21923	up	XM_982666	Gm8013	EG666266	PREDICTED: Mus musculus predicted gene, EG666266 (EG666266), mRNA.	666266	chr5	97350290	97363886							237.489	38.6264	115.187	193.706	403.573	27.9208	68.3405	19.618
AB001926	0.00437382	0.253022	2.26789	down	AB001926	Hspa4l	94kDa,AI461691,APG-1,MGC117843,Osp94	Mus musculus mRNA for APG-1B, complete cds.	18415	chr3	40564696	40594287	GO:0006457(protein folding);GO:0006986(response to unfolded protein)	GO:0005634(nucleus);GO:0005737(cytoplasm)	GO:0000166(nucleotide binding);GO:0005524(ATP binding)	Mm.39330	TC1588057///TC1576803///TC1721663	ENSMUST00000077083	364.608	820.459	327.15	453.416	313.258	813.12	936.353	711.902
AB012601	0.0163076	0.334675	2.95162	down	AB012601	Arntl	Arnt3,BMAL1b,Bmal1,MOP3,bHLHe5,bmal1b	Mus musculus mRNA for BMAL1b', complete cds.	11865	chr7	120424163	120457636	GO:0000060(protein import into nucleus, translocation);GO:0000160(two-component signal transduction system (phosphorelay));GO:0006350(transcription);GO:0006355(regulation of transcription, DNA-dependent);GO:0007165(signal transduction);GO:0007623(circadian rhythm);GO:0042176(regulation of protein catabolic process);GO:0045449(regulation of transcription)	GO:0005634(nucleus)	GO:0000155(two-component sensor activity);GO:0003677(DNA binding);GO:0003700(transcription factor activity);GO:0004871(signal transducer activity);GO:0004872(receptor activity);GO:0005515(protein binding);GO:0030528(transcription regulator activity)	Mm.440371	TC1577063	ENSMUST00000084703	242.826	681.161	365.821	158.495	204.16	564.393	826.705	652.386
AB014889	0.0010286	0.196803	2.61597	down	AB014889	Nr4a2	HZF-3,NOT,Nurr1,RNR-1,TINOR,TINUR	Mus musculus mRNA for Nurr2, complete cds.	18227	chr2	56960566	56976413	GO:0006350(transcription);GO:0006355(regulation of transcription, DNA-dependent);GO:0007399(nervous system development);GO:0030182(neuron differentiation);GO:0042053(regulation of dopamine metabolic process);GO:0045944(positive regulation of transcription from RNA polymerase II promoter)	GO:0005634(nucleus)	GO:0003677(DNA binding);GO:0003700(transcription factor activity);GO:0003707(steroid hormone receptor activity);GO:0004872(receptor activity);GO:0004879(ligand-dependent nuclear receptor activity);GO:0005515(protein binding);GO:0008270(zinc ion binding);GO:0046872(metal ion binding)	Mm.3507	TC1598298	ENSMUST00000028166	899.714	2347.22	1047.43	775.467	876.247	2424.45	2036.02	2581.19
AB030442	0.034428	0.392226	2.07225	down	AB030442	Sh2d3c	Chat,MGC130521,Nsp3,Shep1	Mus musculus chat cDNA for Cas and HEF1 associated signal transducer, complete cds.	27387	chr2	32583225	32610514	GO:0007165(signal transduction);GO:0007242(intracellular signaling cascade);GO:0007264(small GTPase mediated signal transduction)	GO:0005622(intracellular)	GO:0005068(transmembrane receptor protein tyrosine kinase adaptor protein activity);GO:0005085(guanyl-nucleotide exchange factor activity)	Mm.9593	TC1575605	ENSMUST00000074248	80.8825	166.794	107.28	59.7153	75.6525	124.585	161.651	214.145
AB221584	0.0495828	0.427694	2.25972	down	AB221584	Gmeb2	AI839884	Mus musculus cDNA pooled tissues:(tissue_type=brain,dev_stage=8-12 days neonate,strain=BALB/c),(tissue_type=testis,dev_stage=adult, strain=C57BL/6J), clone:V01X010G17.	229004	chr2	180986155	181012826	GO:0006350(transcription);GO:0006355(regulation of transcription, DNA-dependent)	GO:0005634(nucleus)	GO:0003677(DNA binding)	Mm.220423	TC1577695	ENSMUST00000049032	70.5605	154.924	92.4771	41.6183	77.5861	178.663	177.393	108.717
AB253944	0.0379607	0.402746	2.21774	down	AB253944	Mettl7a2	Gm921,UbiE2,Ubie	Mus musculus UbiE2 mRNA for UbiE2, complete cds.	393082	chr15	100183630	100192271	GO:0008152(metabolic process)		GO:0008168(methyltransferase activity)	Mm.440573			528.639	1102.96	815.615	380.061	390.24	992.21	1267.51	1049.16
AB258534	0.00399984	0.253022	3.56602	down	AB258534	Piwil4	9230101H05Rik,Miwi2	Mus musculus piwiL4 mRNA for PiwiL4, complete cds.	330890	chr9	14506801	14545177	GO:0007275(multicellular organismal development)			Mm.334969	TC1595803		111.353	379.402	97.0965	77.7245	159.239	372.195	399.634	366.378
AB264774	0.00131278	0.1969	4.00759	down	AB264774	Chn1	0610007I19Rik,0710001E19Rik,1700112L09Rik,2900046J01Rik,AI413815,ARHGAP2	Mus musculus Chn1 mRNA for alpha3-chimerin, complete cds, wild type.	108699	chr2	73448801	73463726	GO:0007165(signal transduction);GO:0007242(intracellular signaling cascade)	GO:0005622(intracellular)	GO:0005096(GTPase activator activity);GO:0008270(zinc ion binding);GO:0019992(diacylglycerol binding);GO:0046872(metal ion binding)	Mm.257073	TC1590484///TC1572031	ENSMUST00000102677	39.2722	157.64	48.9882	34.8579	33.9706	124.644	193.344	154.933
AF016695	0.0404036	0.409549	2.3847	down	AF016695	Muc2	2010015E03Rik,MCM,wnn	Mus musculus colonic mucin (MUC2) mRNA, partial cds.	17831	chr7	148876262	148879261	GO:0006118(electron transport);GO:0006915(apoptosis);GO:0006917(induction of apoptosis);GO:0008285(negative regulation of cell proliferation);GO:0030336(negative regulation of cell migration)	GO:0005578(proteinaceous extracellular matrix)	GO:0005507(copper ion binding);GO:0005515(protein binding);GO:0009055(electron carrier activity)	Mm.2041	TC1600324///TC1728047	ENSMUST00000084427///ENSMUST00000042368///ENSMUST00000026590	33.3974	84.1477	35.6234	26.7991	37.7697	106.52	100.032	45.8913
AF038896	0.00104346	0.196803	2.8779	down	AF038896	Pde4d	9630011N22Rik,Dpde3	Mus musculus cyclic AMP specific phosphodiesterase PDE4D5A mRNA, partial cds.	238871	chr13	110051005	110724169	GO:0006198(cAMP catabolic process);GO:0006939(smooth muscle contraction);GO:0007165(signal transduction)		GO:0003824(catalytic activity);GO:0004114(3',5'-cyclic-nucleotide phosphodiesterase activity);GO:0016787(hydrolase activity);GO:0046872(metal ion binding)	Mm.434429	TC1594887///NP049127///TC1585860///TC1593636	ENSMUST00000079975	50.7385	144.338	59.9646	52.0279	40.2231	136.188	140.458	156.368
AF041861	0.0302639	0.381676	3.14572	down	AF041861	Synj2	AI481647,SJ2,mKIAA0348	Mus musculus synaptojanin 2 isoform zeta mRNA, partial cds.	20975	chr17	6024983	6038555		GO:0005575(cellular_component)	GO:0001668(phosphatidylinositol-4,5-bisphosphate 5-phosphatase activity);GO:0003676(nucleic acid binding);GO:0003723(RNA binding);GO:0004437(inositol or phosphatidylinositol phosphatase activity);GO:0004439(phosphoinositide 5-phosphatase activity);GO:0004445(inositol-polyphosphate 5-phosphatase activity);GO:0005515(protein binding);GO:0016787(hydrolase activity)	Mm.444395///Mm.236068	TC1715609///TC1589150///TC1579476	ENSMUST00000080283///ENSMUST00000061091	79.8346	228.892	132.34	43.725	63.4392	191.341	287.889	207.445
AF075435	0.0255189	0.362944	3.43858	down	AF075435	Trp63	AI462811,Ket,MGC115972,TAp63,Tp63,Trp53rp1,deltaNp63,p51/p63,p63,p73L	Mus musculus TA*p63 beta mRNA, complete cds.	22061	chr16	25684277	25892166	GO:0001501(skeletal development);GO:0001736(establishment of planar polarity);GO:0001738(morphogenesis of a polarized epithelium);GO:0001942(hair follicle development);GO:0006350(transcription);GO:0006355(regulation of transcription, DNA-dependent);GO:0006915(apoptosis);GO:0006917(induction of apoptosis);GO:0007219(Notch signaling pathway);GO:0007275(multicellular organismal development);GO:00073…	GO:0005634(nucleus)	GO:0003677(DNA binding);GO:0003682(chromatin binding);GO:0003700(transcription factor activity);GO:0008270(zinc ion binding);GO:0046872(metal ion binding)	Mm.20894	NP832205///TC1596989	ENSMUST00000040231	49.6262	176.303	61.3035	31.079	56.496	250.234	183.226	95.4491
AF082803	0.0377582	0.402746	2.50826	down	AF082803	Cd244	2B4,C9.1,F730046O15Rik,Ly90,NAIL,NKR2B4,Nmrk,SLAMF4	Mus musculus NK cell receptor 2B4 splice variant mRNA, complete cds.	18106	chr1	173489323	173508381		GO:0009897(external side of plasma membrane);GO:0016020(membrane);GO:0016021(integral to membrane)	GO:0004872(receptor activity)	Mm.2299	TC1590708///NP714008	ENSMUST00000004829	61.0594	167.202	61.659	54.321	67.1983	272.024	125.763	103.82
AF163668	0.00637412	0.264874	2.26337	down	AF163668	Rorc	Nr1f3,RORgamma,TOR,Thor	Mus musculus RORgamma t mRNA, complete cds.	19885	chr3	94181381	94202510	GO:0006350(transcription);GO:0006355(regulation of transcription, DNA-dependent);GO:0006468(protein amino acid phosphorylation);GO:0030154(cell differentiation);GO:0048535(lymph node development)	GO:0005634(nucleus)	GO:0003677(DNA binding);GO:0003700(transcription factor activity);GO:0003707(steroid hormone receptor activity);GO:0004872(receptor activity);GO:0004879(ligand-dependent nuclear receptor activity);GO:0008270(zinc ion binding);GO:0046872(metal ion binding)	Mm.4372	TC1582154	ENSMUST00000029795	485.334	1093.2	415.254	606.193	434.555	1145.69	1243.96	889.942
AF201287	0.00269689	0.234804	3.69878	down	AF201287	Tsc22d3	DIP,Dsip1,Gilz,TSC-22R,Tilz3	Mus musculus TSC22-related inducible leucine zipper 3a (Tilz3a) mRNA, complete cds.	14605	chrX	137074067	137077134	GO:0006355(regulation of transcription, DNA-dependent);GO:0006916(anti-apoptosis)		GO:0003700(transcription factor activity)	Mm.22216	TC1589724///TC1780107	ENSMUST00000055738	619.759	2219.58	805.569	634.046	419.661	2308.99	2355.08	1994.66
AF345952	0.0010787	0.1969	2.13031	down	AF345952	Dusp16	3830417M17Rik,AW558566,D6Ertd213e,MKP-7,MKP7,Mkpm	Mus musculus map kinase phosphatase-M A2 isoform mRNA, complete cds.	70686	chr6	134665490	134742646	GO:0000188(inactivation of MAPK activity);GO:0006470(protein amino acid dephosphorylation)	GO:0005634(nucleus);GO:0005737(cytoplasm)	GO:0005515(protein binding);GO:0016301(kinase activity);GO:0016787(hydrolase activity);GO:0016791(phosphoric monoester hydrolase activity);GO:0017017(MAP kinase phosphatase activity)	Mm.3994	NP395659	ENSMUST00000065273	600.154	1268.87	707.324	530.085	563.054	1231.74	1265.72	1309.14
AF353669	0.019832	0.348426	2.08644	down	AF353669	Flnb	AL024016	alt 'AL024016'	286940	chr14	8751623	8756071	GO:0007519(striated muscle development)	GO:0001725(stress fiber);GO:0005737(cytoplasm);GO:0005856(cytoskeleton);GO:0005925(focal adhesion)	GO:0003779(actin binding);GO:0005515(protein binding)	Mm.28095	TC1592853///TC1694591///TC1773904///NP429108///TC1641814	ENSMUST00000052678	318.869	642.874	384.907	362.476	209.224	670.408	646.317	611.898
AF396877	0.0279571	0.374223	2.05321	down	AF396877	Dst	2310001O04Rik,A830042E19Rik,AW554249,BP230,BPAG1-n,Bpag,Bpag1,Macf2,ah,athetoid,dt,mKIAA0728,nmf203,nmf339	alt '2310001O04Rik#A830042E19Rik#AW554249#BP230#BPAG1-n#Bpag#Bpag1#Macf2#ah#athetoid#dt#mKIAA0728#nmf203#nmf339'	13518	chr1	34217176	34240121	GO:0007050(cell cycle arrest);GO:0007155(cell adhesion);GO:0008090(retrograde axon cargo transport);GO:0031110(regulation of microtubule polymerization or depolymerization);GO:0031122(cytoplasmic microtubule organization and biogenesis);GO:0045104(intermediate filament cytoskeleton organization and biogenesis)	GO:0005737(cytoplasm);GO:0005856(cytoskeleton);GO:0015629(actin cytoskeleton);GO:0015630(microtubule cytoskeleton);GO:0016023(cytoplasmic membrane-bound vesicle);GO:0030056(hemidesmosome)	GO:0003779(actin binding);GO:0005198(structural molecule activity);GO:0005200(structural constituent of cytoskeleton);GO:0005509(calcium ion binding);GO:0005515(protein binding);GO:0008017(microtubule binding)	Mm.336625	TC1623274///TC1595050///TC1661495///TC1598453///TC1598767	ENSMUST00000088270///ENSMUST00000088216///ENSMUST00000097785	62.6804	133.011	63.9533	69.8449	54.2429	174.488	136.481	88.0648
AF499446	0.01275	0.312505	2.10364	down	AF499446	Dmbx1	Atx,Cdmx,Mbx,Otx3	Mus musculus PRD class homeobox protein (Dmbx1) mRNA, complete cds.	140477	chr4	115587723	115598243	GO:0006350(transcription);GO:0006355(regulation of transcription, DNA-dependent);GO:0007275(multicellular organismal development);GO:0007420(brain development);GO:0016481(negative regulation of transcription);GO:0045449(regulation of transcription);GO:0048589(developmental growth)	GO:0005634(nucleus)	GO:0003677(DNA binding);GO:0003700(transcription factor activity);GO:0016564(transcriptional repressor activity)	Mm.213206	TC1591156///TC1632820	ENSMUST00000064806	45.6737	95.7016	55.0221	46.7911	35.2078	99.6567	111.525	75.9232
AF502565	0.0026675	0.234008	2.05749	down	AF502565	Trip10	AI646975,Cip4	Mus musculus Cdc42-interacting protein 4-2 (Cip4) mRNA, complete cds	106628	chr17	57388873	57402846	GO:0006897(endocytosis);GO:0007015(actin filament organization);GO:0007165(signal transduction)	GO:0005764(lysosome);GO:0005856(cytoskeleton);GO:0005874(microtubule);GO:0016020(membrane)	GO:0005515(protein binding);GO:0008289(lipid binding)	Mm.37368	TC1578096	ENSMUST00000019631	398.097	815.174	466.187	386.978	341.126	842.675	880.112	722.734
AJ278430	0.00946153	0.289427	2.43448	down	AJ278430	Acox3	BI685180,EST-s59,PCOX	Mus musculus mRNA for pristanoyl-CoA oxidase (Acox3 gene).	80911	chr5	35925861	35956450	GO:0006118(electron transport);GO:0006629(lipid metabolic process);GO:0006631(fatty acid metabolic process);GO:0006635(fatty acid beta-oxidation);GO:0008152(metabolic process)	GO:0005777(peroxisome);GO:0005782(peroxisomal matrix)	GO:0003995(acyl-CoA dehydrogenase activity);GO:0003997(acyl-CoA oxidase activity);GO:0016402(pristanoyl-CoA oxidase activity);GO:0016491(oxidoreductase activity);GO:0016627(oxidoreductase activity, acting on the CH-CH group of donors);GO:0050660(FAD binding)	Mm.291503	TC1581230	ENSMUST00000068947	416.814	1027.71	503.254	393.883	353.304	732.395	1132.83	1217.9
AJ278735	0.0214366	0.351353	2.7138	down	AJ278735	Cabc1	4632432J16Rik,AI462003,mKIAA0451	Mus musculus mRNA for hypothetical protein (ORF1), 1975 BP.	67426	chr1	182095270	182123597	GO:0006457(protein folding)	GO:0005739(mitochondrion)	GO:0000166(nucleotide binding);GO:0005524(ATP binding);GO:0016301(kinase activity);GO:0016740(transferase activity)	Mm.38330	TC1717711///TC1572809	ENSMUST00000027766	401.668	1031.44	582.816	240.58	381.607	1165.05	1077.01	852.268
AJ311774	0.0151962	0.330473	2.41926	down	AJ311774	Art3	4930569O04Rik	Mus musculus mRNA for ART3 mono(ADP-ribosyl)transferase (art3 gene), splice variant 6.	109979	chr5	92817159	92832682	GO:0006471(protein amino acid ADP-ribosylation)	GO:0005615(extracellular space);GO:0016020(membrane)	GO:0003956(NAD(P)+-protein-arginine ADP-ribosyltransferase activity);GO:0016740(transferase activity);GO:0016757(transferase activity, transferring glycosyl groups);GO:0048503(GPI anchor binding)	Mm.263514	NP514132	ENSMUST00000058129	151.091	353.189	176.072	180.854	96.3465	369.631	306.541	383.394
AK002513	0.0279603	0.374223	2.44158	down	AK002513	Nr1h4	AI957360,Fxr,HRR1,RIP14,Rxrip14	Mus musculus adult male kidney cDNA, RIKEN full-length enriched library, clone:0610010O18 product:nuclear receptor subfamily 1, group H, member 4, full insert sequence.	20186	chr10	88917122	88969372	GO:0006350(transcription);GO:0006355(regulation of transcription, DNA-dependent);GO:0008206(bile acid metabolic process)	GO:0005634(nucleus)	GO:0003677(DNA binding);GO:0003700(transcription factor activity);GO:0003707(steroid hormone receptor activity);GO:0004872(receptor activity);GO:0004879(ligand-dependent nuclear receptor activity);GO:0005515(protein binding);GO:0008270(zinc ion binding);GO:0046872(metal ion binding)	Mm.3095	TC1582434	ENSMUST00000058126	105	240.862	146.934	60.2895	107.776	222.106	257.601	242.88
AK002569	0.0168686	0.337099	2.28326	down	AK002569	2610110G12Rik	0610011P08Rik,2610008K08Rik,3110080J08Rik	Mus musculus adult male kidney cDNA, RIKEN full-length enriched library, clone:0610011P08 product:0610011P08RIK PROTEIN, full insert sequence.	73242	chr17	36040275	36046684			GO:0008415(acyltransferase activity);GO:0016740(transferase activity)	Mm.273155	NP744378///TC1581726///NP744175	ENSMUST00000056034///ENSMUST00000061052	174.015	383.073	117.39	235.498	169.156	398.764	409.95	340.507
AK003841	0.0186146	0.345236	2.51803	down	AK003841	1110020A21Rik	2600015P10Rik	Mus musculus 18-day embryo whole body cDNA, RIKEN full-length enriched library, clone:1110020A21 product:unclassifiable, full insert sequence.	68531	chr17	85316521	85356763							49.454	121.927	45.4566	34.4553	68.4502	106.097	102.898	156.785
AK004584	0.00239168	0.229119	3.64601	down	AK004584	N/A	N/A	Mus musculus adult male lung cDNA, RIKEN full-length enriched library, clone:1200003N03 product:glucocorticoid-induced leucine zipper, full insert sequence.	N/A	chrX	137074075	137077724							341.248	1247.69	402.809	358.253	262.683	1391.76	1424.77	926.538
AK004624	0.000778134	0.191784	3.95337	down	AK004624	Mbd1	Cxxc3,PCM1	Mus musculus adult male lung cDNA, RIKEN full-length enriched library, clone:1200007A08 product:methyl-CpG binding domain protein 1, full insert sequence.	17190	chr18	74427957	74442339	GO:0006306(DNA methylation);GO:0006350(transcription);GO:0006355(regulation of transcription, DNA-dependent)	GO:0000785(chromatin);GO:0000792(heterochromatin);GO:0005634(nucleus)	GO:0003677(DNA binding);GO:0008270(zinc ion binding);GO:0046872(metal ion binding)	Mm.22522	TC1699912///TC1727829///TC1588047	ENSMUST00000025446	1490.11	5839.48	1876.26	1329.12	1264.97	5528.07	5168.38	6821.98
AK006330	0.00175479	0.210713	3.79108	down	AK006330	Gpr160	1700025D19Rik,GPCR150	Mus musculus adult male testis cDNA, RIKEN full-length enriched library, clone:1700025D19 product:weakly similar to PUTATIVE G PROTEIN-COUPLED RECEPTOR [Homo sapiens], full insert sequence.	71862	chr3	30754871	30796087	GO:0007165(signal transduction);GO:0007186(G-protein coupled receptor protein signaling pathway)	GO:0016020(membrane);GO:0016021(integral to membrane)	GO:0001584(rhodopsin-like receptor activity);GO:0004871(signal transducer activity);GO:0004872(receptor activity);GO:0004930(G-protein coupled receptor activity)	Mm.272019	TC1583275	ENSMUST00000046748	116.79	439.8	146.437	113.86	90.0748	388.541	387.867	542.993
AK008130	0.0384762	0.403163	2.39582	down	AK008130	Fyttd1	2010005M05Rik,3830411L18Rik,3830421F13Rik,4933423A17Rik,AI098218,AW539567,C85190	Mus musculus adult male small intestine cDNA, RIKEN full-length enriched library, clone:2010005M05 product:hypothetical protein, full insert sequence.	69823	chr16	32877925	32897336				Mm.12831	TC1601616///TC1679147///TC1573561	ENSMUST00000023489	49.7582	126.26	59.5927	44.7121	44.9698	144.043	165.697	69.039
AK008437	0.0235709	0.35558	2.90885	down	AK008437	2010204K13Rik	0610010M13Rik,Cip7	Mus musculus adult male small intestine cDNA, RIKEN full-length enriched library, clone:2010204K13 product:unclassifiable, full insert sequence.	68355	chrX	6989224	7000114		GO:0016021(integral to membrane)		Mm.45111	TC1590916///TC1596292	ENSMUST00000081164	27.0422	77.3865	16.6444	27.619	36.8633	53.1211	102.245	76.7931
AK008826	0.0420485	0.412816	2.17706	down	AK008826	2210404E10Rik	-	Mus musculus adult male stomach cDNA, RIKEN full-length enriched library, clone:2210404E10 product:unclassifiable, full insert sequence.	72305	chr19	10759282	10759965							49.2569	114.635	44.7868	49.761	53.223	72.7257	96.1522	175.026
AK008995	0.00905332	0.284334	2.62729	down	AK008995	Dgat1	C75990,D15Ertd23e,Dgat	Mus musculus adult male tongue cDNA, RIKEN full-length enriched library, clone:2300001D04 product:diacylglycerol acyltransferase 1, full insert sequence.	13350	chr15	76332444	76333610		GO:0005624(membrane fraction);GO:0005783(endoplasmic reticulum);GO:0016020(membrane);GO:0016021(integral to membrane)	GO:0003846(2-acylglycerol O-acyltransferase activity);GO:0004144(diacylglycerol O-acyltransferase activity);GO:0008415(acyltransferase activity);GO:0016740(transferase activity)	Mm.22633	TC1716114///TC1579105	ENSMUST00000023214	6756.7	17411.3	9224.62	5679.49	5365.98	13835.4	18867.6	19530.8
AK009217	0.0252266	0.362655	2.04755	down	AK009217	Klk12	2310008B01Rik,AI324852,KLK-L5	Mus musculus adult male tongue cDNA, RIKEN full-length enriched library, clone:2310008B01 product:similar to KALLIKREIN 12 PRECURSOR (EC 3.4.21.-) (KALLIKREIN-LIKE PROTEIN 5) (KLK-L5) [Homo sapiens], full insert sequence.	69511	chr7	51025020	51028946	GO:0006508(proteolysis)	GO:0005625(soluble fraction)	GO:0004252(serine-type endopeptidase activity)	Mm.20163	TC1600997	ENSMUST00000014063	105.227	209.187	122.17	124.378	69.1345	229.802	216.528	181.233
AK010129	0.0113118	0.302106	2.81529	down	AK010129	2310069G16Rik	-	Mus musculus adult male tongue cDNA, RIKEN full-length enriched library, clone:2310069G16 product:unclassifiable, full insert sequence.	69659	chr15	44619329	44637373							50.1133	134.213	71.3696	32.3723	46.5979	129.959	146.526	126.154
AK010480	0.0154055	0.330854	2.19306	down	AK010480	Mospd2	2410013I23Rik	Mus musculus ES cells cDNA, RIKEN full-length enriched library, clone:2410013I23 product:RIKEN cDNA 2410013I23 gene, full insert sequence.	76763	chrX	161376140	161418257	GO:0006928(cell motility)	GO:0016020(membrane);GO:0016021(integral to membrane)	GO:0005198(structural molecule activity)	Mm.291758	TC1588072///TC1588889	ENSMUST00000004715	167.112	354.41	213.411	175.831	112.093	378.5	342.343	342.387
AK011280	0.0108001	0.296619	2.01549	down	AK011280	Rabl3	4930553C05Rik,AA958834	Mus musculus 10 days embryo whole body cDNA, RIKEN full-length enriched library, clone:2610002D21 product:hypothetical RAS small GTPases, Rab subfamily/ATP/GTP-binding site motif A (P-loop)/Sigma-54 factor interaction domain containing protein, full insert sequence.	67657	chr16	37539979	37572471	GO:0000160(two-component signal transduction system (phosphorelay));GO:0006355(regulation of transcription, DNA-dependent);GO:0007264(small GTPase mediated signal transduction)	GO:0005622(intracellular)	GO:0003677(DNA binding);GO:0005524(ATP binding);GO:0005525(GTP binding);GO:0008134(transcription factor binding)	Mm.28158	TC1580569	ENSMUST00000023524	149.141	302.483	169.444	154.617	123.362	310.966	360.328	236.153
AK013632	0.0239185	0.355999	2.57715	down	AK013632	Ccdc13	2900041A11Rik,Gm188	Mus musculus adult male hippocampus cDNA, RIKEN full-length enriched library, clone:2900041A11 product:hypothetical protein, full insert sequence.	434446	chr9	121706747	121719282				Mm.335550	TC1588124		65.57	161.453	94.0636	40.5078	62.1386	145.009	140.664	198.684
AK013649	0.016593	0.336067	2.19779	down	AK013649	Setd5	2900045N06Rik,C330007C20,C85544,FLJ10707,MGC90828,mKIAA1757	Mus musculus adult male hippocampus cDNA, RIKEN full-length enriched library, clone:2900045N06 product:hypothetical SET-domain of transcriptional regulators (TRX, EZ, ASH1 etc) containing protein, full insert sequence.	72895	chr6	113060410	113067611		GO:0005634(nucleus)		Mm.367159	TC1576457///TC1603722///TC1621897///TC1598196	ENSMUST00000042889	59.8184	129.61	77.7625	57.4603	44.2323	140.894	145.794	102.141
AK014960	0.0317612	0.387164	3.14415	down	AK014960	Setd2	4921524K10Rik,BC031601,KMT3A	Mus musculus adult male testis cDNA, RIKEN full-length enriched library, clone:4921524K10 product:hypothetical protein, full insert sequence.	235626	chr9	110463619	110473239		GO:0005634(nucleus)	GO:0016491(oxidoreductase activity);GO:0046914(transition metal ion binding)	Mm.288949	TC1698441	ENSMUST00000035068	58.179	185.412	63.257	77.0035	34.2764	151.798	284.106	120.33
AK015079	0.00933176	0.287839	2.53787	down	AK015079	4930404H11Rik	-	Mus musculus adult male testis cDNA, RIKEN full-length enriched library, clone:4930404H11 product:unclassifiable, full insert sequence.	73815	chr12	72641593	72657120					NP742601		36.7276	93.8124	45.5839	29.1571	35.4418	84.7475	122.555	74.1342
AK017403	0.00125214	0.1969	2.16156	down	AK017403	Aifm2	5430437E11Rik,Amid,D730001I10Rik,PRG3	Mus musculus 6 days neonate head cDNA, RIKEN full-length enriched library, clone:5430437E11 product:P53-RESPONSIVE GENE 3 homolog [Homo sapiens], full insert sequence.	71361	chr10	61178035	61201400	GO:0006118(electron transport);GO:0006917(induction of apoptosis);GO:0008152(metabolic process);GO:0008637(apoptotic mitochondrial changes);GO:0030261(chromosome condensation)	GO:0005737(cytoplasm);GO:0005739(mitochondrion);GO:0005741(mitochondrial outer membrane);GO:0005829(cytosol);GO:0016020(membrane);GO:0016021(integral to membrane);GO:0019867(outer membrane)	GO:0003674(molecular_function);GO:0003677(DNA binding);GO:0004174(electron-transferring-flavoprotein dehydrogenase activity);GO:0016491(oxidoreductase activity);GO:0050660(FAD binding)	Mm.286309	TC1640078///TC1593733	ENSMUST00000067857///ENSMUST00000080099	453.868	978.058	453.293	515.022	393.289	956.139	1080.26	897.771
AK017409	0.00335922	0.24627	2.63304	down	AK017409	N/A	N/A	Mus musculus 6 days neonate head cDNA, RIKEN full-length enriched library, clone:5430439A09 product:transcription factor AP-2, alpha, full insert sequence.	N/A	chr13	40823176	40830531							190.145	493.214	226.476	202.269	141.69	458.734	558.166	462.742
AK017854	0.012365	0.310081	2.64612	down	AK017854	Pqlc1	2310009N05Rik,4933425L21Rik,5730564E11Rik,C78974	Mus musculus 8 days embryo whole body cDNA, RIKEN full-length enriched library, clone:5730564E11 product:RIKEN cDNA 5730564E11 gene, full insert sequence.	66943	chr18	80453048	80471885		GO:0016020(membrane);GO:0016021(integral to membrane)		Mm.29247	TC1593398///TC1594089	ENSMUST00000070135///ENSMUST00000091798	56.3136	146.426	72.8616	38.4674	57.6118	119.42	182.828	137.029
AK018271	0.0155921	0.331575	2.43511	down	AK018271	N/A	N/A	Mus musculus adult male olfactory brain cDNA, RIKEN full-length enriched library, clone:6430400A21 product:requiem, full insert sequence.	N/A	chr19	5899323	5902491							58.6811	138.535	70.3877	68.018	37.6376	159.278	137.652	118.676
AK018658	0.0211507	0.351353	2.0978	down	AK018658	B4galt4	9130402O08Rik,B4galt-IV,beta4GalT-IV	Mus musculus adult male cecum cDNA, RIKEN full-length enriched library, clone:9130402O08 product:UDP-Gal:betaGlcNAc beta 1,4-galactosyltransferase, polypeptide 4, full insert sequence.	56375	chr16	38742394	38768957	GO:0005975(carbohydrate metabolic process)	GO:0005615(extracellular space);GO:0016020(membrane);GO:0016021(integral to membrane)	GO:0003945(N-acetyllactosamine synthase activity);GO:0016740(transferase activity);GO:0016757(transferase activity, transferring glycosyl groups);GO:0030145(manganese ion binding);GO:0046872(metal ion binding)	Mm.182377	NP740439	ENSMUST00000023482	92.1286	195.658	102.781	71.5868	102.019	192.655	251.03	143.288
AK020080	0.0484665	0.427325	2.17752	down	AK020080	9030624G23Rik	-	Mus musculus 13 days embryo male testis cDNA, RIKEN full-length enriched library, clone:6030462H23 product:hypothetical protein, full insert sequence.	66808	chr12	24728066	24782134	GO:0006355(regulation of transcription, DNA-dependent)	GO:0005622(intracellular)	GO:0003676(nucleic acid binding);GO:0005509(calcium ion binding)	Mm.379124	TC1586734		116.304	241.807	175.34	96.3435	77.227	280.339	184.113	260.97
AK030003	0.021387	0.351353	2.51558	down	AK030003	Pacs2	6720425G15Rik,AW208651,AW489976,E230011J22,Pacs1l,mKIAA0602	Mus musculus adult male testis cDNA, RIKEN full-length enriched library, clone:4932414L12 product:hypothetical Serine-rich region profile containing protein, full insert sequence.	217893	chr12	114288718	114310655	GO:0006915(apoptosis)	GO:0005739(mitochondrion);GO:0005783(endoplasmic reticulum)		Mm.35754	TC1638446///TC1647717///TC1600590	ENSMUST00000019147///ENSMUST00000101006	161.373	382.979	233.449	151.543	99.1277	365.245	418.263	365.43
AK030165	0.0437857	0.41712	2.28005	down	AK030165	Spag9	3110018C07Rik,4733401I23Rik,4831406C20Rik,AW552012,JLP,JSAP2,JSAP2a,Jip4,Mapk8ip4,syd1	Mus musculus adult male testis cDNA, RIKEN full-length enriched library, clone:4933407L23 product:SPERM SPECIFIC PROTEIN homolog [Homo sapiens], full insert sequence.	70834	chr11	93857404	93911963	GO:0000187(activation of MAPK activity);GO:0051260(protein homooligomerization)	GO:0005737(cytoplasm)	GO:0008432(JUN kinase binding);GO:0019894(kinesin binding)	Mm.260737	TC1719317///TC1640868///TC1604731///TC1681194///TC1624336	ENSMUST00000103169	65.164	141.621	46.3093	100.359	48.8233	136.777	111.112	176.975
AK030594	0.0267441	0.368843	2.16552	down	AK030594	Ube2f	2510010F15Rik,AI851109	Mus musculus adult male pituitary gland cDNA, RIKEN full-length enriched library, clone:5330436B09 product:NEDD8-conjugating enzyme NCE2 (EC 6.3.2.19) (Ubiquitin-conjugating enzyme E2) (Ubiquitin-protein ligase) (Ubiquitin carrier protein) homolog [Homo sapiens], full insert sequence.	67921	chr1	93146895	93182602	GO:0006464(protein modification process);GO:0006512(ubiquitin cycle)		GO:0004842(ubiquitin-protein ligase activity);GO:0016874(ligase activity);GO:0019787(small conjugating protein ligase activity)	Mm.378049///Mm.337238	TC1595799///TC1706753///TC1615900	ENSMUST00000071825	96.5042	210.981	116.957	71.3681	101.187	158.279	191.114	283.55
AK031405	0.00440083	0.253022	2.04592	down	AK031405	Mospd2	2410013I23Rik	Mus musculus 13 days embryo male testis cDNA, RIKEN full-length enriched library, clone:6030424E15 product:hypothetical Major sperm protein (MSP) domain/Cellular retinaldehyde-binding protein (CRAL)/Triple function domain (TRIO) containing protein, full insert sequence.	76763	chrX	161374249	161418257	GO:0006928(cell motility)	GO:0016020(membrane);GO:0016021(integral to membrane)	GO:0005198(structural molecule activity)	Mm.291758	TC1588072///TC1588889	ENSMUST00000004715	403.334	819.903	380.484	342.898	486.621	780.847	930.831	748.031
AK031658	0.0162096	0.333339	2.05415	down	AK031658	Prei4	2310004G06Rik,2310032D16Rik,AU015213,mKIAA1434	Mus musculus 13 days embryo male testis cDNA, RIKEN full-length enriched library, clone:6030473O12 product:hypothetical Glycerophosphoryl diester phosphodiesterase/Glycosyl hydrolase, starch-binding domain containing protein, full insert sequence.	74182	chr2	132354818	132403984	GO:0005975(carbohydrate metabolic process);GO:0006071(glycerol metabolic process)		GO:0003824(catalytic activity);GO:0008889(glycerophosphodiester phosphodiesterase activity);GO:0016787(hydrolase activity);GO:0030246(carbohydrate binding)	Mm.211211	TC1586411///TC1625029	ENSMUST00000028822	536.374	1101.75	636.253	413.808	559.062	1155.83	848.415	1301.02
AK031797	0.028008	0.374223	2.79829	down	AK031797	2810474O19Rik	6720435I21Rik,AA536804,AU020969,GET,KIAA1551,mKIAA1551	Mus musculus 11 days embryo head cDNA, RIKEN full-length enriched library, clone:6230430P05 product:RIKEN cDNA 2810474O19 gene, full insert sequence.	67246	chr6	149257952	149278306				Mm.333515	TC1597288///TC1599490///TC1598359	ENSMUST00000046689	307.491	795.489	500.194	206.372	215.907	812.816	922.011	651.639
AK032486	0.00119041	0.1969	3.49765	down	AK032486	Mapk8	AI849689,JNK,JNK1,Prkm8,SAPK1	Mus musculus adult male olfactory brain cDNA, RIKEN full-length enriched library, clone:6430564C21 product:mitogen activated protein kinase 8, full insert sequence.	26419	chr14	34204123	34260343	GO:0001503(ossification);GO:0006468(protein amino acid phosphorylation);GO:0007258(JUN phosphorylation);GO:0009411(response to UV);GO:0018107(peptidyl-threonine phosphorylation);GO:0043066(negative regulation of apoptosis)		GO:0000166(nucleotide binding);GO:0004672(protein kinase activity);GO:0004674(protein serine/threonine kinase activity);GO:0004705(JUN kinase activity);GO:0004707(MAP kinase activity);GO:0005515(protein binding);GO:0005524(ATP binding);GO:0016301(kinase activity);GO:0016740(transferase activity)	Mm.21495///Mm.441782	TC1616561///TC1634600///TC1577892///TC1598120///TC1597850	ENSMUST00000022504	43.122	149.033	53.1743	33.6083	42.5834	160.231	159.278	127.59
AK032535	0.00943669	0.289427	2.27669	down	AK032535	Mbd1	Cxxc3,PCM1	Mus musculus adult male olfactory brain cDNA, RIKEN full-length enriched library, clone:6430584N06 product:methyl-CpG binding domain protein 1, full insert sequence.	17190	chr18	74433066	74440888	GO:0006306(DNA methylation);GO:0006350(transcription);GO:0006355(regulation of transcription, DNA-dependent)	GO:0000785(chromatin);GO:0000792(heterochromatin);GO:0005634(nucleus)	GO:0003677(DNA binding);GO:0008270(zinc ion binding);GO:0046872(metal ion binding)	Mm.22522	TC1699912///TC1727829///TC1588047	ENSMUST00000025446	399.093	909.73	489.843	383.357	324.08	1004.11	1032.09	692.986
AK033005	0.0199301	0.348572	2.21498	down	AK033005	Rbms3	6720477E09Rik,MGC118437	Mus musculus 12 days embryo male wolffian duct includes surrounding region cDNA, RIKEN full-length enriched library, clone:6720490M18 product:hypothetical RNA-binding region RNP-1 (RNA recognition motif) containing protein, full insert sequence.	207181	chr9	116487226	117161597			GO:0000166(nucleotide binding);GO:0003676(nucleic acid binding);GO:0003723(RNA binding)	Mm.326411	TC1577818///TC1591909	ENSMUST00000044901	130.255	282.839	179.856	104.785	106.125	232.327	271.068	345.122
AK033541	0.00145619	0.198715	4.48053	down	AK033541	Ell2	-	Mus musculus adult male colon cDNA, RIKEN full-length enriched library, clone:9030614H07 product:hypothetical protein, full insert sequence.	192657	chr13	75899325	75905486	GO:0006368(RNA elongation from RNA polymerase II promoter)	GO:0005575(cellular_component)	GO:0003746(translation elongation factor activity);GO:0008159(positive transcription elongation factor activity)	Mm.21288	TC1689546///TC1582167	ENSMUST00000001583	49.3308	222.282	40.8273	61.9678	45.1974	178.789	288.992	199.064
AK033745	0.0429399	0.415573	2.37957	down	AK033745	N/A	N/A	Mus musculus adult male epididymis cDNA, RIKEN full-length enriched library, clone:9230101G17 product:unclassifiable, full insert sequence.	N/A	chr9	35493009	35494975							79.3201	202.788	80.3255	70.8186	86.8161	265.495	237.206	105.661
AK035652	0.0299994	0.380236	2.58358	down	AK035652	Dusp16	3830417M17Rik,AW558566,D6Ertd213e,MKP-7,MKP7,Mkpm	Mus musculus adult male urinary bladder cDNA, RIKEN full-length enriched library, clone:9530081F05 product:dual specificity phosphatase 16, full insert sequence.	70686	chr6	134687494	134741352	GO:0000188(inactivation of MAPK activity);GO:0006470(protein amino acid dephosphorylation)	GO:0005634(nucleus);GO:0005737(cytoplasm)	GO:0005515(protein binding);GO:0016301(kinase activity);GO:0016787(hydrolase activity);GO:0016791(phosphoric monoester hydrolase activity);GO:0017017(MAP kinase phosphatase activity)	Mm.3994	NP395659	ENSMUST00000065273	84.3794	205.064	89.5808	46.6002	116.957	171.34	211.372	232.482
AK038916	0.0305144	0.383329	2.82809	down	AK038916	Cep120	A230075C01,AU016693,Ccdc100	Mus musculus adult male hypothalamus cDNA, RIKEN full-length enriched library, clone:A230075C01 product:hypothetical C2 domain (Calcium/lipid-binding domain, CaLB) structure containing protein, full insert sequence.	225523	chr18	53845148	53904201				Mm.193678	TC1596287///TC1617576///TC1596918///TC1592139///TC1776578	ENSMUST00000091898///ENSMUST00000049811	61.4843	167.844	85.8122	63.6706	34.9701	117.954	169.814	215.763
AK040384	0.020525	0.350982	2.15299	down	AK040384	Ep300	A430090G16,A730011L11,KAT3B,p300	Mus musculus 0 day neonate thymus cDNA, RIKEN full-length enriched library, clone:A430090G16 product:inferred: p300 protein {Homo sapiens}, full insert sequence.	328572	chr15	81466577	81475033	GO:0001756(somitogenesis);GO:0006355(regulation of transcription, DNA-dependent);GO:0007507(heart development);GO:0007519(striated muscle development);GO:0009887(organ morphogenesis);GO:0030324(lung development);GO:0045449(regulation of transcription);GO:0045893(positive regulation of transcription, DNA-dependent);GO:0045944(positive regulation of transcription from RNA polymerase II promoter)	GO:0000123(histone acetyltransferase complex);GO:0005634(nucleus);GO:0005667(transcription factor complex)	GO:0003677(DNA binding);GO:0003713(transcription coactivator activity);GO:0004402(histone acetyltransferase activity);GO:0005515(protein binding);GO:0008270(zinc ion binding);GO:0016563(transcriptional activator activity)	Mm.258397	TC1642113///TC1590000///TC1626151	ENSMUST00000068387	63.2885	141.605	61.4331	62.2168	66.2155	159.225	174.884	90.7058
AK040948	0.0107784	0.296619	2.33126	down	AK040948	Fam82b	2410005O16Rik,5033415E11Rik,5730501K14Rik,6430576D04Rik,AI449062,mRMD-1	Mus musculus adult male aorta and vein cDNA, RIKEN full-length enriched library, clone:A530050C20 product:unclassifiable, full insert sequence.	66302	chr4	19529539	19532517			GO:0005488(binding)	Mm.440686	TC1750433///TC1581668///TC1619328	ENSMUST00000029888	33.9159	80.7157	29.4234	32.5776	39.7468	70.5239	108.594	63.0291
AK041098	0.0398936	0.407356	2.10132	down	AK041098	Rbms3	6720477E09Rik,MGC118437	Mus musculus adult male aorta and vein cDNA, RIKEN full-length enriched library, clone:A530082O13 product:RNA-BINDING PROTEIN homolog [Homo sapiens], full insert sequence.	207181	chr9	116487226	117161597			GO:0000166(nucleotide binding);GO:0003676(nucleic acid binding);GO:0003723(RNA binding)	Mm.326411	TC1577818///TC1591909	ENSMUST00000044901	83.043	185.714	78.0458	87.3012	83.7819	127.294	147.226	282.621
AK041478	0.0135106	0.318434	2.18439	down	AK041478	Nelf	-	Mus musculus 3 days neonate thymus cDNA, RIKEN full-length enriched library, clone:A630014A09 product:nasal embryonic LHRH factor, full insert sequence.	56876	chr2	24909898	24912395				Mm.42956	TC1591425///TC1572320	ENSMUST00000006646	48.2799	104.671	58.1539	35.7564	50.9295	82.1491	117.799	114.064
AK041692	0.0141831	0.323687	2.51523	down	AK041692	B4galt4	9130402O08Rik,B4galt-IV,beta4GalT-IV	Mus musculus 3 days neonate thymus cDNA, RIKEN full-length enriched library, clone:A630030F08 product:UDP-Gal:betaGlcNAc beta 1,4-galactosyltransferase, polypeptide 4, full insert sequence.	56375	chr16	38742386	38768957	GO:0005975(carbohydrate metabolic process)	GO:0005615(extracellular space);GO:0016020(membrane);GO:0016021(integral to membrane)	GO:0003945(N-acetyllactosamine synthase activity);GO:0016740(transferase activity);GO:0016757(transferase activity, transferring glycosyl groups);GO:0030145(manganese ion binding);GO:0046872(metal ion binding)	Mm.182377	NP740439	ENSMUST00000023482	178.863	433.321	229.349	193.615	113.626	382.982	482.52	434.46
AK041716	0.0328225	0.389997	3.4401	down	AK041716	N/A	N/A	Mus musculus 3 days neonate thymus cDNA, RIKEN full-length enriched library, clone:A630031O13 product:unclassifiable, full insert sequence.	N/A	chr10	20906749	20908423							39.0689	117.804	19.6756	28.685	68.846	120.693	137.17	95.5503
AK041866	0.0441062	0.417463	3.40169	down	AK041866	Hmgxb3	2510002C16Rik,A630042L21Rik,AI413166,mKIAA0194	Mus musculus 3 days neonate thymus cDNA, RIKEN full-length enriched library, clone:A630042L21 product:hypothetical HMG1/2 (high mobility group) box containing protein, full insert sequence.	106894	chr18	61308946	61336704	GO:0006355(regulation of transcription, DNA-dependent)		GO:0003677(DNA binding)	Mm.27620	TC1575808	ENSMUST00000025524	68.0537	221.712	44.4789	116.31	43.372	215.328	322.704	127.104
AK042065	0.0115275	0.302789	2.12203	down	AK042065	Cpeb2	A630055H10Rik	Mus musculus 3 days neonate thymus cDNA, RIKEN full-length enriched library, clone:A630055H10 product:similar to KIAA0940 PROTEIN [Homo sapiens], full insert sequence.	231207	chr5	43626127	43677429	GO:0006417(regulation of translation);GO:0008150(biological_process)	GO:0005737(cytoplasm)	GO:0000166(nucleotide binding);GO:0003676(nucleic acid binding);GO:0003723(RNA binding);GO:0008187(poly-pyrimidine tract binding)	Mm.7233	TC1712714///TC1598317///TC1586697	ENSMUST00000051378	203.916	436.462	245.57	184.559	181.619	474.178	509.884	325.323
AK043043	0.00428075	0.253022	3.72805	down	AK043043	Ccl25	AI852536,CKb15,Scya25,TECK	Mus musculus 7 days neonate cerebellum cDNA, RIKEN full-length enriched library, clone:A730050C11 product:hypothetical protein, full insert sequence.	20300	chr8	4325209	4348788	GO:0006935(chemotaxis);GO:0006954(inflammatory response);GO:0006955(immune response);GO:0007165(signal transduction);GO:0050900(leukocyte migration)	GO:0005576(extracellular region);GO:0005615(extracellular space)	GO:0005125(cytokine activity);GO:0005515(protein binding);GO:0008009(chemokine activity)	Mm.7275	TC1698005///TC1584341	ENSMUST00000024004	37.5369	146.663	37.4075	36.3736	38.8296	156.275	90.8059	192.906
AK043092	0.0147572	0.326691	2.03024	down	AK043092	2810429I04Rik	AI256682	Mus musculus 7 days neonate cerebellum cDNA, RIKEN full-length enriched library, clone:A730055B01 product:unclassifiable, full insert sequence.	76937	chr13	3477505	3484466				Mm.296923	TC1619175///TC1676101///TC1606861///TC1618341		76.9546	155.148	66.5313	98.815	65.5176	147.529	130.069	187.846
AK043137	0.026992	0.369787	3.84499	down	AK043137	Depdc5	AV016528,D5Ertd477e,KIAA0645,mKIAA0645	Mus musculus 7 days neonate cerebellum cDNA, RIKEN full-length enriched library, clone:A730059B08 product:KIAA0645 PROTEIN (WUGSC:H_DJ403E2.1 PROTEIN) homolog [Homo sapiens], full insert sequence.	277854	chr5	33206369	33230316	GO:0007242(intracellular signaling cascade);GO:0008150(biological_process)	GO:0005575(cellular_component)	GO:0003674(molecular_function)	Mm.101524///Mm.439888	TC1602000///TC1687582///TC1601901	ENSMUST00000046788///ENSMUST00000049780	47.0072	156.509	24.1123	31.9138	84.9955	134.939	146.444	188.144
AK043826	0.035237	0.394433	3.3449	down	AK043826	Tulp4	1110057P05Rik,2210038L17Rik,Tusp	Mus musculus 10 days neonate cortex cDNA, RIKEN full-length enriched library, clone:A830037L14 product:unclassifiable, full insert sequence.	68842	chr17	6106829	6138792	GO:0007242(intracellular signaling cascade);GO:0008150(biological_process)	GO:0005737(cytoplasm)	GO:0003674(molecular_function)	Mm.28251	TC1698161///TC1573015	ENSMUST00000039655	55.6309	166.497	96.9601	40.4135	29.519	121.774	177.93	199.788
AK044521	0.000862668	0.194879	2.67416	down	AK044521	Tbc1d30	4930505D03Rik	Mus musculus adult retina cDNA, RIKEN full-length enriched library, clone:A930018M07 product:hypothetical RabGAP/TBC domain containing protein, full insert sequence.	74694	chr10	120701208	120748072		GO:0005622(intracellular)	GO:0005097(Rab GTPase activator activity)	Mm.233833	TC1633741///TC1584938	ENSMUST00000064107	613.747	1621.05	754.386	551.72	535.134	1631.58	1600	1631.58
AK044623	0.0204585	0.350863	2.05996	down	AK044623	Tob2	2900090N22Rik,4930545K18Rik,AV071822,mKIAA1663	Mus musculus adult retina cDNA, RIKEN full-length enriched library, clone:A930027O20 product:unclassifiable, full insert sequence.	57259	chr15	81686163	81688753				Mm.323595	TC1574552///TC1586872	ENSMUST00000039199///ENSMUST00000050467	99.6529	199.31	69.7789	97.1963	131.983	188.344	184.914	224.672
AK044872	0.00520088	0.256741	3.07678	down	AK044872	Camk2d	2810011D23Rik,8030469K03Rik,KIAA4163,MGC60852,[d]-CaMKII,mKIAA4163	Mus musculus 9.5 days embryo parthenogenote cDNA, RIKEN full-length enriched library, clone:B130009G18 product:calcium/calmodulin-dependent protein kinase II, delta, full insert sequence.	108058	chr3	126299890	126514795	GO:0000082(G1/S transition of mitotic cell cycle);GO:0006468(protein amino acid phosphorylation);GO:0006816(calcium ion transport);GO:0046777(protein amino acid autophosphorylation)	GO:0005954(calcium- and calmodulin-dependent protein kinase complex)	GO:0000166(nucleotide binding);GO:0004672(protein kinase activity);GO:0004674(protein serine/threonine kinase activity);GO:0005516(calmodulin binding);GO:0005524(ATP binding);GO:0016301(kinase activity);GO:0016740(transferase activity)	Mm.255822	TC1585875///NP805339///TC1574289	ENSMUST00000066466	33.398	101.24	44.9209	29.384	25.8892	90.0603	87.8314	125.829
AK045201	0.0142078	0.323687	3.75874	down	AK045201	Cdh13	4932416G01Rik,Cdht,T-cadherin,Tcad	Mus musculus 9.5 days embryo parthenogenote cDNA, RIKEN full-length enriched library, clone:B130046G21 product:cadherin 13, full insert sequence.	12554	chr8	120807654	121376658	GO:0007155(cell adhesion);GO:0007156(homophilic cell adhesion)	GO:0005886(plasma membrane);GO:0009897(external side of plasma membrane);GO:0016020(membrane)	GO:0005509(calcium ion binding);GO:0005515(protein binding);GO:0042803(protein homodimerization activity);GO:0048503(GPI anchor binding)	Mm.334841	TC1688339///TC1578336	ENSMUST00000034302	25.2528	102.015	21.3702	24.4439	29.9443	119.049	135.502	51.493
AK045668	0.0336767	0.391435	2.14663	down	AK045668	Sdcbp	MDA-9,Sycl,syntenin-1	Mus musculus adult male corpora quadrigemina cDNA, RIKEN full-length enriched library, clone:B230219O13 product:unclassifiable, full insert sequence.	53378	chr4	6292826	6301275	GO:0006612(protein targeting to membrane);GO:0006930(substrate-bound cell migration, cell extension);GO:0007242(intracellular signaling cascade);GO:0007265(Ras protein signal transduction);GO:0007268(synaptic transmission);GO:0008152(metabolic process);GO:0030036(actin cytoskeleton organization and biogenesis)	GO:0005634(nucleus);GO:0005856(cytoskeleton);GO:0005895(interleukin-5 receptor complex);GO:0005912(adherens junction);GO:0016020(membrane)	GO:0005137(interleukin-5 receptor binding);GO:0005515(protein binding);GO:0008093(cytoskeletal adaptor activity);GO:0016491(oxidoreductase activity);GO:0042043(neurexin binding);GO:0045545(syndecan binding);GO:0046982(protein heterodimerization activity)	Mm.247473	TC1573740///TC1621300	ENSMUST00000103008	40.9567	91.5145	42.847	45.5608	34.4624	56.1941	117.941	100.408
AK048205	0.017709	0.343033	2.26227	down	AK048205	Mcf2l	C130040G20Rik,Dbs,Ost,mKIAA0362	Mus musculus 16 days embryo head cDNA, RIKEN full-length enriched library, clone:C130040G20 product:mcf.2 transforming sequence-like, full insert sequence.	17207	chr8	12947918	12988152	GO:0007242(intracellular signaling cascade);GO:0007266(Rho protein signal transduction);GO:0035023(regulation of Rho protein signal transduction)	GO:0005622(intracellular);GO:0016020(membrane);GO:0030027(lamellipodium)	GO:0005085(guanyl-nucleotide exchange factor activity);GO:0005089(Rho guanyl-nucleotide exchange factor activity);GO:0005515(protein binding);GO:0005545(phosphatidylinositol binding)	Mm.334413	TC1608260///TC1574408	ENSMUST00000095456///ENSMUST00000033819	73.5193	171.655	85.2046	63.8728	71.4804	145.433	241.056	128.475
AK049204	0.00995643	0.292303	2.29102	down	AK049204	Hps3	coa	Mus musculus ES cells cDNA, RIKEN full-length enriched library, clone:C330013C14 product:Hermansky-Pudlak syndrome 3 homolog (human), full insert sequence.	12807	chr3	19914949	19935280	GO:0006996(organelle organization and biogenesis)	GO:0005737(cytoplasm)		Mm.291533	NP720512///TC1576806	ENSMUST00000012580	121.882	272.415	94.1035	107.502	164.04	307.065	245.949	264.23
AK049376	0.00430597	0.253022	3.01909	down	AK049376	Crkrs	1810022J16Rik,AI646528,Crk7,D11Ertd752e,MGC141525,Pksc	Mus musculus ES cells cDNA, RIKEN full-length enriched library, clone:C330039P16 product:CELL DIVISION CYCLE 2-RELATED PROTEIN KINASE 7 (EC 2.7.1.-) (CDC2- RELATED PROTEIN KINASE 7) (CRKRS) homolog [Homo sapiens], full insert sequence.	69131	chr11	98064627	98112358	GO:0006468(protein amino acid phosphorylation)		GO:0000166(nucleotide binding);GO:0004672(protein kinase activity);GO:0004674(protein serine/threonine kinase activity);GO:0005524(ATP binding);GO:0016301(kinase activity);GO:0016740(transferase activity)	Mm.440470	TC1580366///TC1608254///TC1641906///TC1640090///TC1692470	ENSMUST00000003203///ENSMUST00000092733	94.2164	287.719	78.9864	115.289	88.374	249.709	380.159	233.289
AK049453	0.0154527	0.331317	2.14679	down	AK049453	Sash1	1100001C18Rik,2500002E12Rik,A330076K04Rik,mKIAA0790	Mus musculus 7 days embryo whole body cDNA, RIKEN full-length enriched library, clone:C430014G13 product:hypothetical protein, full insert sequence.	70097	chr10	8533519	8605868	GO:0007049(cell cycle);GO:0045786(negative regulation of progression through cell cycle)			Mm.338275	TC1601034///TC1597303///TC1589064	ENSMUST00000015449	54.415	118.104	44.2225	65.4312	53.5913	155.8	101.366	97.1474
AK049619	0.0263508	0.365904	2.01207	down	AK049619	ENSMUSG00000068790	-	Mus musculus 12 days embryo spinal cord cDNA, RIKEN full-length enriched library, clone:C530005E17 product:hypothetical protein, full insert sequence.	545007	chr14	5252108	5753550							51.9632	108.321	45.6745	55.8692	54.3458	153.071	88.5851	83.3081
AK049730	0.0388281	0.403709	2.49444	down	AK049730	Cobl	4732460E13,C530045F18Rik,mKIAA0633	Mus musculus 12 days embryo spinal cord cDNA, RIKEN full-length enriched library, clone:C530045F18 product:cordon-bleu, full insert sequence.	12808	chr11	12204869	12364803	GO:0001843(neural tube closure)			Mm.22847	TC1579932	ENSMUST00000093315	51.5144	130.843	71.4286	46.0445	37.07	194.342	90.0091	108.178
AK049738	0.0103961	0.294292	2.12995	down	AK049738	Arnt	D3Ertd557e,Drnt,ESTM42,Hif1b,KIAA4051,W08714,bHLHe2,mKIAA4051	Mus musculus 12 days embryo spinal cord cDNA, RIKEN full-length enriched library, clone:C530045P18 product:aryl hydrocarbon receptor nuclear translocator, full insert sequence.	11863	chr3	95293326	95296612	GO:0000160(two-component signal transduction system (phosphorelay));GO:0006350(transcription);GO:0006355(regulation of transcription, DNA-dependent);GO:0007165(signal transduction);GO:0009636(response to toxin);GO:0045449(regulation of transcription);GO:0045941(positive regulation of transcription);GO:0045944(positive regulation of transcription from RNA polymerase II promoter)	GO:0005634(nucleus);GO:0005667(transcription factor complex);GO:0005737(cytoplasm)	GO:0000155(two-component sensor activity);GO:0003677(DNA binding);GO:0003700(transcription factor activity);GO:0003713(transcription coactivator activity);GO:0004871(signal transducer activity);GO:0004872(receptor activity);GO:0005515(protein binding);GO:0016563(transcriptional activator activity);GO:0030528(transcription regulator activity)	Mm.250265	NP1489966///TC1629502///NP056617	ENSMUST00000102749	92.497	200.247	102.889	95.2101	79.3915	186.321	258.216	156.204
AK049951	0.00104338	0.196803	4.59263	down	AK049951	C630016N16Rik	ENSMUSG00000052691	Mus musculus adult male hippocampus cDNA, RIKEN full-length enriched library, clone:C630016N16 product:hypothetical protein, full insert sequence.	791088	chr7	31514597	31530948							54.0739	248.968	65.9985	52.8511	43.372	306.658	194.333	245.913
AK050653	0.0309269	0.383329	2.15444	down	AK050653	Wdr33	1110001N06Rik,2310011G05Rik,2810021O11Rik,8430413N20Rik,WDC146	Mus musculus 2 days neonate thymus thymic cells cDNA, RIKEN full-length enriched library, clone:C920029N20 product:WDC146 homolog [Homo sapiens], full insert sequence.	74320	chr18	31963743	32047503		GO:0005634(nucleus)		Mm.277705	NP713238///TC1590400///TC1576101///TC1609429	ENSMUST00000025264///ENSMUST00000082319	318.721	664.942	449.899	285.149	221.115	538.453	786.778	669.595
AK052275	0.0136476	0.320753	4.12644	down	AK052275	Ptprk	AI853699,PTPk	Mus musculus 13 days embryo heart cDNA, RIKEN full-length enriched library, clone:D330017N02 product:protein tyrosine phosphatase, receptor type, K, full insert sequence.	19272	chr10	27794625	28272004	GO:0006470(protein amino acid dephosphorylation);GO:0007185(transmembrane receptor protein tyrosine phosphatase signaling pathway);GO:0016311(dephosphorylation)	GO:0005615(extracellular space);GO:0005886(plasma membrane);GO:0016020(membrane);GO:0016021(integral to membrane)	GO:0004721(phosphoprotein phosphatase activity);GO:0004725(protein tyrosine phosphatase activity);GO:0004872(receptor activity);GO:0016787(hydrolase activity);GO:0016791(phosphoric monoester hydrolase activity)	Mm.443545///Mm.332303	TC1589963///TC1616782///TC1595045///TC1580264	ENSMUST00000020042	39.6219	150.688	63.2308	34.0988	21.5362	155.335	116.607	180.122
AK053039	0.00199862	0.2208	2.48789	down	AK053039	Chl1	A530023M13Rik,AI465420,CALL,LICAM2	Mus musculus 15 days embryo head cDNA, RIKEN full-length enriched library, clone:D930030E07 product:close homolog of L1, full insert sequence.	12661	chr6	103461323	103641671	GO:0001764(neuron migration);GO:0007155(cell adhesion);GO:0007156(homophilic cell adhesion);GO:0007275(multicellular organismal development);GO:0007399(nervous system development);GO:0007411(axon guidance);GO:0007610(behavior);GO:0030154(cell differentiation);GO:0031175(neurite development)	GO:0005578(proteinaceous extracellular matrix);GO:0016020(membrane);GO:0016021(integral to membrane);GO:0030425(dendrite);GO:0045177(apical part of cell)	GO:0005515(protein binding)	Mm.251288	TC1652011///TC1634954///TC1580155	ENSMUST00000066905	44.724	110.958	38.7407	53.4359	41.9955	125.947	94.7878	112.139
AK076460	0.000182239	0.147766	2.32736	down	AK076460	1110057K04Rik	-	Mus musculus 0 day neonate head cDNA, RIKEN full-length enriched library, clone:4833409B11 product:hypothetical alpha/beta-Hydrolases structure containing protein, full insert sequence.	68832	chr12	8214952	8292558	GO:0006629(lipid metabolic process)		GO:0003824(catalytic activity);GO:0016787(hydrolase activity)	Mm.25608	TC1580482	ENSMUST00000037383	8075.52	18835.6	8566.6	7758.26	7901.71	18344	20869.1	17293.7
AK076809	0.00873846	0.280696	2.34579	down	AK076809	4930474G06Rik	-	Mus musculus adult male testis cDNA, RIKEN full-length enriched library, clone:4930474G06 product:unclassifiable, full insert sequence.	320624	chr18	29030716	29096517				Mm.50107	TC1627003		42.3274	100.252	34.5141	43.372	49.0962	109.063	117.941	73.7527
AK076883	0.00807176	0.279264	2.27118	down	AK076883	1700023L04Rik	-	Mus musculus adult male testis cDNA, RIKEN full-length enriched library, clone:4930534K23 product:unclassifiable, full insert sequence.	76419	chr6	29935330	29943776				Mm.84522	TC1616408	ENSMUST00000052497	67.8992	157.47	60.7368	73.1285	69.8324	193.47	165.358	113.582
AK079405	0.000933635	0.194879	2.68578	down	AK079405	2810474O19Rik	6720435I21Rik,AA536804,AU020969,GET,KIAA1551,mKIAA1551	Mus musculus adult male bone cDNA, RIKEN full-length enriched library, clone:9830126O13 product:RIKEN cDNA 2810474O19 gene, full insert sequence.	67246	chr6	149257952	149278306				Mm.333515	TC1597288///TC1599490///TC1598359	ENSMUST00000046689	129.538	344.782	121.095	156.628	110.89	352.404	315.776	366.167
AK080160	0.0168218	0.337046	3.66866	down	AK080160	N/A	N/A	Mus musculus adult male aorta and vein cDNA, RIKEN full-length enriched library, clone:A530072M11 product:unclassifiable, full insert sequence.	N/A	chr4	16091231	16193372							36.1833	123.044	40.9118	49.6738	17.9644	144.245	124.541	100.345
AK080161	0.0288743	0.376175	2.17354	down	AK080161	Nrg4	AI552600	Mus musculus adult male aorta and vein cDNA, RIKEN full-length enriched library, clone:A530073A21 product:neuregulin 4, full insert sequence.	83961	chr9	55069107	55131402		GO:0016020(membrane);GO:0016021(integral to membrane)	GO:0008083(growth factor activity)	Mm.441133	TC1595873		61.3682	127.852	77.7646	37.6596	68.6803	127.703	114.058	141.796
AK082528	0.0155762	0.331575	2.32306	down	AK082528	Klhdc2	2310022K15Rik,D12Ertd522e,HCLP-1,LCP	Mus musculus 0 day neonate cerebellum cDNA, RIKEN full-length enriched library, clone:C230059G03 product:HOST CELL FACTOR HOMOLOG LCP (CDNA FLJ10909 FIS, CLONE OVARC1000091, WEAKLY SIMILAR TO HOST CELL FACTOR C1) (HEPATOCELLULAR CARCINOMA- ASSOCIATED ANTIGEN 33) homolog [Homo sapiens], full insert sequence.	69554	chr12	70397754	70402104			GO:0005515(protein binding)	Mm.234368	TC1574912///TC1637661	ENSMUST00000021362	81.7002	191.464	68.4239	73.3087	103.368	134.29	224.271	215.832
AK083150	0.0441284	0.417463	4.50291	down	AK083150	N/A	N/A	Mus musculus adult male hippocampus cDNA, RIKEN full-length enriched library, clone:C630018D16 product:unclassifiable, full insert sequence.	N/A	chr16	42884482	42912176							73.5434	275.085	111.926	22.3068	86.3972	328.917	289.526	206.811
AK083464	0.00506733	0.254055	3.08108	down	AK083464	Schip1	Nf2ip,SCHIP-1,Schip-1a,Schip-1b	Mus musculus 9 days embryo whole body cDNA, RIKEN full-length enriched library, clone:D030021M14 product:schwannomin interacting protein 1, full insert sequence.	30953	chr3	68272120	68430386		GO:0005737(cytoplasm)	GO:0005515(protein binding);GO:0042803(protein homodimerization activity)	Mm.331064	TC1762837	ENSMUST00000044717	40.6213	126.13	31.7729	49.7411	40.35	117.317	164.314	96.7591
AK085306	0.0311018	0.38346	4.63189	down	AK085306	Acer2	2410116I05Rik,Asah3l,CRG-L1,maCER2	Mus musculus 0 day neonate kidney cDNA, RIKEN full-length enriched library, clone:D630008P07 product:similar to CANCER RELATED GENE-LIVER 1 [Mus musculus], full insert sequence.	230379	chr4	86520367	86580726	GO:0006629(lipid metabolic process);GO:0006672(ceramide metabolic process)	GO:0000139(Golgi membrane);GO:0005789(endoplasmic reticulum membrane);GO:0016020(membrane);GO:0016021(integral to membrane)	GO:0016787(hydrolase activity);GO:0016811(hydrolase activity, acting on carbon-nitrogen (but not peptide) bonds, in linear amides);GO:0017040(ceramidase activity)	Mm.45019	TC1598986///TC1585840	ENSMUST00000045224///ENSMUST00000074334	62.4694	254.323	25.1758	53.6943	108.538	318.557	282.254	162.159
AK085438	0.0267931	0.368843	2.92165	down	AK085438	N/A	N/A	Mus musculus 0 day neonate kidney cDNA, RIKEN full-length enriched library, clone:D630025F22 product:unclassifiable, full insert sequence.	N/A	chr15	78404840	78412019							29.1919	86.2279	28.3748	19.1488	40.052	128.272	69.7581	60.6537
AK086281	0.00555297	0.258696	2.00744	down	AK086281	Agpat1	1-AGP,1-AGPAT,AW047140	Mus musculus 15 days embryo head cDNA, RIKEN full-length enriched library, clone:D930018E17 product:1-ACYL-SN-GLYCEROL-3-PHOSPHATE ACYLTRANSFERASE ALPHA (EC 2.3.1.51) (1- AGP ACYLTRANSFERASE 1) (1-AGPAT 1) (LYSOPHOSPHATIDIC ACID ACYLTRANSFERASE-ALPHA) (LPAAT-ALPHA) (1-ACYLGLYCEROL-3-PHOSPHATE O- ACYLTRANSFERASE 1) homolog [Mus musculus], full insert sequence.	55979	chr17	34742826	34750394	GO:0008152(metabolic process);GO:0008654(phospholipid biosynthetic process)	GO:0005615(extracellular space);GO:0016020(membrane);GO:0016021(integral to membrane)	GO:0003841(1-acylglycerol-3-phosphate O-acyltransferase activity);GO:0008415(acyltransferase activity);GO:0016740(transferase activity)	Mm.8684	TC1685118///TC1579254	ENSMUST00000037489	291.246	586.796	324.895	248.749	300.093	475.35	652.126	632.913
AK087634	0.00799304	0.278401	3.22241	down	AK087634	Stab1	FEEL-1,KIAA0246,MS-1,STAB-1,mKIAA0246	Mus musculus 2 days pregnant adult female oviduct cDNA, RIKEN full-length enriched library, clone:E230029F23 product:stabilin 1, full insert sequence.	192187	chr14	31969822	31975087	GO:0006898(receptor-mediated endocytosis);GO:0006954(inflammatory response);GO:0007155(cell adhesion);GO:0007267(cell-cell signaling);GO:0016525(negative regulation of angiogenesis);GO:0042742(defense response to bacterium)	GO:0005737(cytoplasm);GO:0005887(integral to plasma membrane);GO:0016020(membrane);GO:0016021(integral to membrane)	GO:0004872(receptor activity);GO:0005041(low-density lipoprotein receptor activity);GO:0005044(scavenger receptor activity);GO:0005515(protein binding);GO:0005540(hyaluronic acid binding);GO:0008367(bacterial binding);GO:0015035(protein disulfide oxidoreductase activity)	Mm.220821	TC1588424///TC1611017	ENSMUST00000036618	40.1725	123.047	40.4269	24.7384	55.3522	121.044	133.27	114.828
AK088914	0.0305394	0.383329	3.53462	down	AK088914	Zfp191	3526401F17Rik,5033419P20Rik,AI480505,AI642085,AL024422,KOX17,ZF-12,Znf191,Znp191	Mus musculus 2 days neonate thymus thymic cells cDNA, RIKEN full-length enriched library, clone:E430031C07 product:zinc finger protein 191, full insert sequence.	59057	chr18	24168359	24171896	GO:0006350(transcription);GO:0006355(regulation of transcription, DNA-dependent);GO:0016481(negative regulation of transcription)	GO:0005622(intracellular);GO:0005634(nucleus)	GO:0003676(nucleic acid binding);GO:0003677(DNA binding);GO:0003700(transcription factor activity);GO:0005515(protein binding);GO:0008270(zinc ion binding);GO:0016564(transcriptional repressor activity);GO:0046872(metal ion binding)	Mm.417427	TC1698412///TC1691629///TC1574637	ENSMUST00000066497	58.1668	185.783	102.085	33.9744	38.4415	149.699	156.766	250.882
AK089473	0.0284987	0.375518	2.02293	down	AK089473	Lpl	-	Mus musculus B6-derived CD11 +ve dendritic cells cDNA, RIKEN full-length enriched library, clone:F730037C07 product:lipoprotein lipase, full insert sequence.	16956	chr8	71404453	71413578	GO:0006629(lipid metabolic process);GO:0016042(lipid catabolic process)	GO:0005615(extracellular space);GO:0016020(membrane);GO:0042627(chylomicron)	GO:0003824(catalytic activity);GO:0004465(lipoprotein lipase activity);GO:0005319(lipid transporter activity);GO:0008201(heparin binding);GO:0016787(hydrolase activity);GO:0048503(GPI anchor binding)	Mm.1514	TC1573803///TC1777349	ENSMUST00000081237	582.319	1126.43	842.317	439.58	465.061	1061.26	1148.82	1169.22
AK089940	0.0233089	0.354968	2.06911	down	AK089940	Med25	2610034E13Rik,2610529E18Rik,ESTM2,X83308	Mus musculus RCB-0545 OHTA cDNA, RIKEN full-length enriched library, clone:G430009B04 product:hypothetical Integrin A (or I) domain structure containing protein, full insert sequence.	75613	chr7	52134760	52147736				Mm.157778	TC1598951///TC1703966///TC1775715	ENSMUST00000003049	54.4402	115.185	44.7005	59.9492	58.6709	144.696	78.9616	121.898
AK090037	0.0296738	0.378476	2.19103	down	AK090037	Fibp	2010004G08Rik,2010005N21Rik,3010027N18Rik	Mus musculus bladder RCB-0544 MBT-2 cDNA, RIKEN full-length enriched library, clone:G430069F17 product:fibroblast growth factor (acidic) intracellular binding protein, full insert sequence.	58249	chr19	5460693	5463074		GO:0005634(nucleus)	GO:0017134(fibroblast growth factor binding)	Mm.329656	TC1589240	ENSMUST00000025847	149.182	315.564	216.53	110.408	120.608	289.742	271.69	385.259
AK090194	0.0238019	0.355999	3.42789	down	AK090194	Fam19a5	AW049604,TAFA5,Tafa-5,Tara-5	Mus musculus 16 days neonate male medulla oblongata cDNA, RIKEN full-length enriched library, clone:G630016A22 product:hypothetical protein, full insert sequence.	106014	chr15	87374728	87589794		GO:0005615(extracellular space)		Mm.244319	TC1637340		75.3656	239.891	38.6049	114.44	73.0521	261.025	282.113	176.534
AK122210	0.0214874	0.351353	2.58159	down	AK122210	Ubap2l	3110083O19Rik,4932431F02Rik,A430103N23Rik,C77168,MGC25504,Nice-4,mKIAA0144	Mus musculus mRNA for mKIAA0144 protein.	74383	chr3	89810140	89825438				Mm.25610	TC1664695///TC1656826///TC1670189///TC1624269///TC1599402	ENSMUST00000080538///ENSMUST00000029553	59.4612	153.734	81.0447	53.7712	43.5677	214.175	125.365	121.662
AK132234	0.00646318	0.264874	4.36521	down	AK132234	Sgk1	Sgk	Mus musculus adult male brain cDNA, RIKEN full-length enriched library, clone:3632410E02 product:serum/glucocorticoid regulated kinase, full insert sequence.	20393	chr10	21713756	21719695	GO:0006468(protein amino acid phosphorylation);GO:0006915(apoptosis);GO:0006974(response to DNA damage stimulus)	GO:0005634(nucleus);GO:0005783(endoplasmic reticulum)	GO:0000166(nucleotide binding);GO:0004672(protein kinase activity);GO:0004674(protein serine/threonine kinase activity);GO:0005515(protein binding);GO:0005524(ATP binding);GO:0016301(kinase activity);GO:0016740(transferase activity)	Mm.28405	TC1609075///TC1585076	ENSMUST00000020145	278.58	1163.59	157.844	324.414	353.48	1026.46	1005.37	1458.96
AK133611	0.0108882	0.297232	4.21803	down	AK133611	Naalad2	2700022G20Rik,D9Ertd285e,GCPIII,MGC124348,MGC124349,NAADALASE2,NAALADASE2	Mus musculus adult male pituitary gland cDNA, RIKEN full-length enriched library, clone:5330415C22 product:N-acetylated alpha-linked acidic dipeptidase 2, full insert sequence.	72560	chr9	18127464	18190480	GO:0006508(proteolysis);GO:0042135(neurotransmitter catabolic process)	GO:0016020(membrane);GO:0016021(integral to membrane)	GO:0003824(catalytic activity);GO:0004180(carboxypeptidase activity);GO:0008233(peptidase activity);GO:0008237(metallopeptidase activity);GO:0008270(zinc ion binding);GO:0009980(glutamate carboxypeptidase activity);GO:0016787(hydrolase activity);GO:0016805(dipeptidase activity);GO:0017165(dipeptidase E activity);GO:0043275(glutamate carboxypeptidase II activity);GO:0046872(metal ion binding)	Mm.7060	TC1581289	ENSMUST00000001826	29.5575	131.076	32.2279	35.2031	21.2416	185.722	135.795	71.7107
AK135113	0.0269011	0.368856	2.21961	down	AK135113	2410089E03Rik	4732468D17Rik	Mus musculus adult male olfactory brain cDNA, RIKEN full-length enriched library, clone:6430599A19 product:hypothetical protein, full insert sequence.	73692	chr15	8144300	8152606				Mm.164436	TC1581936///TC1608418///TC1775543	ENSMUST00000044206	109.534	232.257	104.608	70.5084	153.487	245.697	247.474	203.6
AK136634	0.00309698	0.24139	12.3789	down	AK136634	Myh13	MyHC-eo	Mus musculus adult male epididymis cDNA, RIKEN full-length enriched library, clone:9230014G19 product:Extraocular myosin heavy chain (Fragment) homolog [Homo sapiens], full insert sequence.	544791	chr11	67178286	67185004	GO:0007010(cytoskeleton organization and biogenesis)	GO:0005856(cytoskeleton);GO:0016459(myosin complex)	GO:0003774(motor activity);GO:0005524(ATP binding)	Mm.340163	TC1621424	ENSMUST00000081911	35.1733	465.167	24.758	47.9362	32.8258	605.18	210.661	579.661
AK136939	0.00414487	0.253022	2.37384	down	AK136939	Palmd	4631423C22Rik,PALML	Mus musculus adult male diencephalon cDNA, RIKEN full-length enriched library, clone:9330200H01 product:palmdelphin, full insert sequence.	114301	chr3	116624775	116671870	GO:0008360(regulation of cell shape)	GO:0005737(cytoplasm);GO:0016020(membrane)		Mm.253736	TC1579161///TC1608271	ENSMUST00000040097	89.9762	209.928	113.878	85.4284	70.6219	215.03	223.639	191.114
AK137456	0.00368891	0.253022	5.19854	down	AK137456	Mb	AI325109	Mus musculus adult male bone cDNA, RIKEN full-length enriched library, clone:9830004A21 product:myoglobin, full insert sequence.	17189	chr15	76845916	76853070	GO:0001666(response to hypoxia);GO:0006810(transport);GO:0015671(oxygen transport);GO:0043353(enucleate erythrocyte differentiation)		GO:0005344(oxygen transporter activity);GO:0005506(iron ion binding);GO:0019825(oxygen binding);GO:0020037(heme binding);GO:0046872(metal ion binding)	Mm.404074	TC1575720	ENSMUST00000019037	49.1953	271.076	43.0936	51.2341	53.2581	319.604	150.749	342.876
AK137700	0.0220695	0.352113	2.48822	down	AK137700	Slc27a1	FATP1,Fatp	Mus musculus adult female vagina cDNA, RIKEN full-length enriched library, clone:9930101G10 product:solute carrier family 27 (fatty acid transporter), member 1, full insert sequence.	26457	chr8	74104414	74110607	GO:0001676(long-chain fatty acid metabolic process);GO:0006629(lipid metabolic process);GO:0006631(fatty acid metabolic process);GO:0006810(transport);GO:0006869(lipid transport);GO:0008152(metabolic process)	GO:0005886(plasma membrane);GO:0016020(membrane);GO:0016021(integral to membrane);GO:0031410(cytoplasmic vesicle)	GO:0000166(nucleotide binding);GO:0003824(catalytic activity);GO:0004467(long-chain-fatty-acid-CoA ligase activity);GO:0005215(transporter activity);GO:0016874(ligase activity)	Mm.38165	TC1582895	ENSMUST00000034267	79.8308	190.882	78.2174	50.4419	110.833	213.595	153.241	205.808
AK139799	0.00657089	0.264874	3.02753	down	AK139799	N/A	N/A	Mus musculus 2 cells egg cDNA, RIKEN full-length enriched library, clone:B020017P16 product:unclassifiable, full insert sequence.	N/A	chr5	30419493	30424222							38.0786	117.812	33.8675	46.7062	33.6621	112.79	83.2165	157.429
AK140325	0.0238452	0.355999	2.27628	down	AK140325	Sh2b2	Aps	Mus musculus 4 days neonate male adipose cDNA, RIKEN full-length enriched library, clone:B430112H10 product:adaptor protein with pleckstrin homology and src, full insert sequence.	23921	chr5	136694018	136720724	GO:0001922(B-1 B cell homeostasis);GO:0007242(intracellular signaling cascade);GO:0008286(insulin receptor signaling pathway);GO:0019221(cytokine and chemokine mediated signaling pathway);GO:0019222(regulation of metabolic process);GO:0030036(actin cytoskeleton organization and biogenesis);GO:0042593(glucose homeostasis);GO:0046325(negative regulation of glucose import);GO:0050776(regulation of i…	GO:0001725(stress fiber);GO:0001726(ruffle);GO:0005737(cytoplasm);GO:0005884(actin filament);GO:0005886(plasma membrane);GO:0016020(membrane)	GO:0005068(transmembrane receptor protein tyrosine kinase adaptor protein activity);GO:0005070(SH3/SH2 adaptor activity);GO:0005515(protein binding)	Mm.425294	TC1583710		174.645	386.095	227.853	182.662	113.419	403.542	444.023	310.721
AK140453	0.0400322	0.408064	2.86607	down	AK140453	Usp53	AA939927,Phxr3,Sp6,mKIAA1350	Mus musculus 10 days neonate medulla oblongata cDNA, RIKEN full-length enriched library, clone:B830035G11 product:weakly similar to Hypothetical ubiquitin carboxyl-terminal hydrolase family 2 containing protein [Mus musculus], full insert sequence.	99526	chr3	122655474	122687365	GO:0006511(ubiquitin-dependent protein catabolic process);GO:0008150(biological_process)	GO:0005575(cellular_component)	GO:0004221(ubiquitin thiolesterase activity);GO:0016787(hydrolase activity)	Mm.219684	NP577422///TC1630826///TC1588626///TC1598048	ENSMUST00000090379	59.372	162.666	94.9504	36.236	46.9297	227.69	114.521	145.786
AK141816	0.043301	0.416553	2.94615	down	AK141816	Tbc1d8	AD3,HBLP1,VRP	Mus musculus 12 days embryo spinal ganglion cDNA, RIKEN full-length enriched library, clone:D130009N18 product:TBC1 domain family, member 8, full insert sequence.	54610	chr1	39430160	39535580	GO:0006457(protein folding);GO:0008150(biological_process)	GO:0005575(cellular_component);GO:0005622(intracellular);GO:0016021(integral to membrane)	GO:0003674(molecular_function);GO:0005096(GTPase activator activity);GO:0005097(Rab GTPase activator activity)	Mm.387293	TC1576889	ENSMUST00000054462	30.6457	99.7798	26.1839	27.7666	37.9866	46.0774	153.241	100.021
AK141888	0.0491757	0.427659	2.48466	down	AK141888	Btaf1	AI414500,AI447930,E430027O22Rik,TAF170	Mus musculus 12 days embryo spinal ganglion cDNA, RIKEN full-length enriched library, clone:D130053C05 product:BTAF1 protein (Fragment) homolog [Homo sapiens], full insert sequence.	107182	chr19	37034674	37064443	GO:0042742(defense response to bacterium);GO:0050832(defense response to fungus)		GO:0003676(nucleic acid binding);GO:0003677(DNA binding);GO:0004386(helicase activity);GO:0005488(binding);GO:0005524(ATP binding);GO:0008026(ATP-dependent helicase activity);GO:0016491(oxidoreductase activity);GO:0046914(transition metal ion binding)	Mm.295062	TC1664924	ENSMUST00000099494	55.1408	149.806	59.1685	44.1092	62.1446	91.0017	248.321	110.094
AK143592	0.00662147	0.264874	2.03624	down	AK143592	Fgfr3	Fgfr-3,HBGFR	Mus musculus 6 days neonate spleen cDNA, RIKEN full-length enriched library, clone:F420011N06 product:fibroblast growth factor receptor 3, full insert sequence.	14184	chr5	34064372	34079712	GO:0000165(MAPKKK cascade);GO:0002009(morphogenesis of an epithelium);GO:0006468(protein amino acid phosphorylation);GO:0007155(cell adhesion);GO:0008285(negative regulation of cell proliferation);GO:0008543(fibroblast growth factor receptor signaling pathway);GO:0030900(forebrain development);GO:0031398(positive regulation of protein ubiquitination);GO:0035315(hair cell differentiation);GO:00430…	GO:0005764(lysosome);GO:0009898(internal side of plasma membrane);GO:0016020(membrane);GO:0016021(integral to membrane);GO:0048471(perinuclear region of cytoplasm)	GO:0000166(nucleotide binding);GO:0004672(protein kinase activity);GO:0004713(protein-tyrosine kinase activity);GO:0004872(receptor activity);GO:0004908(interleukin-1 receptor activity);GO:0005007(fibroblast growth factor receptor activity);GO:0005515(protein binding);GO:0005524(ATP binding);GO:0016301(kinase activity);GO:0016740(transferase activity)	Mm.6904	TC1740562///TC1576655///TC1634819	ENSMUST00000067150	187.127	382.411	211.966	156.878	192.537	465.978	335.485	345.77
AK143649	0.0053568	0.256741	2.4199	down	AK143649	Srgap2	9930124L22Rik,AI448945,FBP2,Fnbp2,srGAP3	Mus musculus 6 days neonate spleen cDNA, RIKEN full-length enriched library, clone:F430006B14 product:Hypothetical cell division control protein 15, full insert sequence.	14270	chr1	133258602	133423938	GO:0007165(signal transduction);GO:0051301(cell division)	GO:0005622(intracellular);GO:0005743(mitochondrial inner membrane)	GO:0005096(GTPase activator activity);GO:0005515(protein binding)	Mm.276259	TC1599176///TC1584565///TC1685352///TC1622918	ENSMUST00000027683///ENSMUST00000097585	32.5685	80.3322	29.3036	36.1357	32.2662	73.5586	63.0612	104.377
AK144241	0.00104946	0.196803	8.38144	down	AK144241	Aldh3a1	Ahd-4,Ahd4,Aldh,Aldh3	Mus musculus colon RCB-0549 Cle-H3 cDNA, RIKEN full-length enriched library, clone:G430146D23 product:aldehyde dehydrogenase family 3, subfamily A1, full insert sequence.	11670	chr11	61022243	61031916	GO:0006081(aldehyde metabolic process);GO:0006118(electron transport);GO:0008152(metabolic process)	GO:0005737(cytoplasm);GO:0005829(cytosol)	GO:0004028(3-chloroallyl aldehyde dehydrogenase activity);GO:0004029(aldehyde dehydrogenase (NAD) activity);GO:0004030(aldehyde dehydrogenase [NAD(P)+] activity);GO:0008106(alcohol dehydrogenase (NADP+) activity);GO:0016491(oxidoreductase activity)	Mm.4257	TC1580393	ENSMUST00000019246	30.7114	269.186	25.6096	32.6947	33.8299	275.282	164.92	367.355
AK144367	0.0247045	0.357566	2.91035	down	AK144367	G630016G05Rik	-	Mus musculus 0 day neonate cortex cDNA, RIKEN full-length enriched library, clone:G630041N23 product:unclassifiable, full insert sequence.	654793	chr2	115892960	115911647							41.2221	120.79	28.6812	57.2826	37.7025	72.9477	141.691	147.73
AK144727	0.00292808	0.237966	3.16665	down	AK144727	Ccdc109a	2010012O16Rik,AV064928,C10orf42,D130073L02Rik,Gm64	Mus musculus lung RCB-0558 LLC cDNA, RIKEN full-length enriched library, clone:G730027H15 product:hypothetical protein, full insert sequence.	215999	chr10	58917693	59079440		GO:0016020(membrane);GO:0016021(integral to membrane)		Mm.296470///Mm.69732	TC1586614///TC1740634	ENSMUST00000009791	75.4754	236.059	92.1199	55.5946	78.7118	256.289	259.197	192.691
AK145451	0.00529923	0.256741	4.24541	down	AK145451	Nfil3	AV225605,E4BP4	Mus musculus 1 cell embryo 1 cell cDNA, RIKEN full-length enriched library, clone:I0C0047D12 product:nuclear factor, interleukin 3, regulated, full insert sequence.	18030	chr13	53062577	53068434	GO:0006355(regulation of transcription, DNA-dependent)	GO:0005575(cellular_component);GO:0005634(nucleus)	GO:0003674(molecular_function);GO:0003677(DNA binding);GO:0003700(transcription factor activity);GO:0046983(protein dimerization activity)	Mm.136604	TC1582388	ENSMUST00000071065	1011.07	4506.13	803.978	1147.04	1082.2	3415.16	3274.41	6828.83
AK146851	0.0462706	0.422796	2.58845	down	AK146851	Cpt1b	Cpt1,M-CPTI	Mus musculus 16 days embryo heart cDNA, RIKEN full-length enriched library, clone:I920064J20 product:carnitine palmitoyltransferase 1b, muscle, full insert sequence.	12895	chr15	89246835	89256293	GO:0006629(lipid metabolic process);GO:0006631(fatty acid metabolic process);GO:0006810(transport);GO:0015909(long-chain fatty acid transport)	GO:0005739(mitochondrion);GO:0005741(mitochondrial outer membrane);GO:0016020(membrane);GO:0016021(integral to membrane);GO:0019867(outer membrane)	GO:0004095(carnitine O-palmitoyltransferase activity);GO:0008415(acyltransferase activity);GO:0016301(kinase activity);GO:0016740(transferase activity)	Mm.358582	TC1581482	ENSMUST00000052315	78.0185	192.992	124.875	53.2926	55.8882	168.018	143.586	267.371
AK147415	0.0458288	0.422796	3.06917	down	AK147415	Cacna1d	8430418G19Rik,C79217,Cacnl1a2,Cchl1a,Cchl1a2,D-LTCC	Mus musculus cDNA, RIKEN full-length enriched library, clone:M5C1037D15 product:calcium channel, voltage-dependent, L type, alpha 1D subunit, full insert sequence.	12289	chr14	30853124	31166672	GO:0006810(transport);GO:0006811(ion transport);GO:0006813(potassium ion transport);GO:0006816(calcium ion transport);GO:0007188(G-protein signaling, coupled to cAMP nucleotide second messenger);GO:0007605(sensory perception of sound)	GO:0005887(integral to plasma membrane);GO:0005891(voltage-gated calcium channel complex);GO:0008076(voltage-gated potassium channel complex);GO:0016020(membrane);GO:0016021(integral to membrane)	GO:0005216(ion channel activity);GO:0005244(voltage-gated ion channel activity);GO:0005245(voltage-gated calcium channel activity);GO:0005249(voltage-gated potassium channel activity);GO:0005262(calcium channel activity);GO:0005509(calcium ion binding);GO:0008331(high voltage-gated calcium channel activity)	Mm.9772	TC1600954///TC1690167///TC1580567	ENSMUST00000057695	65.0215	178.96	114.478	35.328	45.2591	145.723	239.586	151.572
AK147947	0.0152851	0.330854	2.11517	down	AK147947	Pprc1	A930018M19,BC013720,MGC12121,PRC,mKIAA0595	Mus musculus melanocyte cDNA, RIKEN full-length enriched library, clone:G270112B11 product:peroxisome proliferative activated receptor, gamma, coactivator-related 1, full insert sequence.	226169	chr19	46131028	46144258			GO:0000166(nucleotide binding);GO:0003676(nucleic acid binding);GO:0004872(receptor activity);GO:0005515(protein binding)	Mm.2415	TC1737917	ENSMUST00000062322	179.172	387.37	155.318	200.424	181.774	403.284	273.697	485.129
AK148259	0.000509963	0.174949	2.29241	down	AK148259	Ctps	-	Mus musculus B16 F10Y cells cDNA, RIKEN full-length enriched library, clone:G370067N16 product:cytidine 5'-triphosphate synthase, full insert sequence.	51797	chr4	120212470	120242868	GO:0006221(pyrimidine nucleotide biosynthetic process);GO:0006241(CTP biosynthetic process);GO:0006541(glutamine metabolic process)		GO:0003824(catalytic activity);GO:0003883(CTP synthase activity);GO:0016874(ligase activity)	Mm.1815	TC1576071	ENSMUST00000030381	564.111	1300.18	536.038	576.346	579.95	1172.5	1504.06	1223.97
AK148446	0.031191	0.383829	2.0293	down	AK148446	2810002N01Rik	1700081D05Rik,Apop-1,Apop1	Mus musculus adult pancreas islet cells cDNA, RIKEN full-length enriched library, clone:C820001G05 product:hypothetical protein, full insert sequence.	68020	chr12	112951481	112965327				Mm.425762	TC1614733///TC1624061	ENSMUST00000040519	40.4739	83.231	51.2199	33.4281	36.7736	110.014	60.1012	79.5774
AK154214	0.00131295	0.1969	2.38172	down	AK154214	Fam53c	2810012G03Rik	Mus musculus NOD-derived CD11c +ve dendritic cells cDNA, RIKEN full-length enriched library, clone:F630010A16 product:Putative nuclear protein homolog, full insert sequence.	66306	chr18	34919209	34933414				Mm.29424	TC1672896	ENSMUST00000049281	108.921	259.058	112.716	121.573	92.4721	249.544	295.327	232.304
AK154494	0.00466989	0.253022	2.40197	down	AK154494	Ablim2	AI606905,C230091L11	Mus musculus NOD-derived CD11c +ve dendritic cells cDNA, RIKEN full-length enriched library, clone:F630040F20 product:actin-binding LIM protein 2, full insert sequence.	231148	chr5	36100579	36200613	GO:0007010(cytoskeleton organization and biogenesis);GO:0008150(biological_process)	GO:0005575(cellular_component)	GO:0003674(molecular_function);GO:0003779(actin binding);GO:0008270(zinc ion binding);GO:0046872(metal ion binding)	Mm.254446	NP571381///TC1578202	ENSMUST00000054598	88.75	208.647	111.272	88.8656	66.1124	212.439	216.779	196.722
AK154620	0.000735017	0.190215	3.21902	down	AK154620	Gpr160	1700025D19Rik,GPCR150	Mus musculus NOD-derived CD11c +ve dendritic cells cDNA, RIKEN full-length enriched library, clone:F630101I02 product:G protein-coupled receptor 160, full insert sequence.	71862	chr3	30754871	30796087	GO:0007165(signal transduction);GO:0007186(G-protein coupled receptor protein signaling pathway)	GO:0016020(membrane);GO:0016021(integral to membrane)	GO:0001584(rhodopsin-like receptor activity);GO:0004871(signal transducer activity);GO:0004872(receptor activity);GO:0004930(G-protein coupled receptor activity)	Mm.272019	TC1583275	ENSMUST00000046748	135.899	437.608	113.607	142.721	151.37	475.793	362.909	474.12
AK155562	0.0221343	0.352113	2.38321	down	AK155562	P2ry2	P2Y2	Mus musculus NOD-derived CD11c +ve dendritic cells cDNA, RIKEN full-length enriched library, clone:F630324E02 product:purinergic receptor P2Y, G-protein coupled 2, full insert sequence.	18442	chr7	108145085	108152400	GO:0007165(signal transduction);GO:0007186(G-protein coupled receptor protein signaling pathway)	GO:0005887(integral to plasma membrane);GO:0016020(membrane);GO:0016021(integral to membrane)	GO:0001584(rhodopsin-like receptor activity);GO:0004871(signal transducer activity);GO:0004872(receptor activity);GO:0004930(G-protein coupled receptor activity);GO:0045028(purinergic nucleotide receptor activity, G-protein coupled)	Mm.3000	TC1583818///NP057546	ENSMUST00000037540	88.4151	200.448	123.26	86.8997	55.0855	203.949	216.609	180.787
AK155677	0.0224926	0.352844	2.25353	down	AK155677	Map3k9	E130314H24Rik,Mlk1,Prke1	Mus musculus B6-derived CD11 +ve dendritic cells cDNA, RIKEN full-length enriched library, clone:F730120L22 product:mitogen-activated protein kinase kinase kinase 9, full insert sequence.	338372	chr12	82822574	82881994	GO:0006468(protein amino acid phosphorylation)		GO:0000166(nucleotide binding);GO:0004672(protein kinase activity);GO:0004674(protein serine/threonine kinase activity);GO:0004713(protein-tyrosine kinase activity);GO:0005524(ATP binding);GO:0016301(kinase activity);GO:0016740(transferase activity)	Mm.436861	TC1609666///TC1589693		223.999	488.147	301.734	148.069	222.194	406.73	509.704	548.008
AK155717	0.0279357	0.374223	3.09865	down	AK155717	Itgam	CD11b/CD18,CR3,CR3A,Cd11b,F730045J24Rik,Ly-40,MAC1,Mac-1,Mac-1a	Mus musculus B6-derived CD11 +ve dendritic cells cDNA, RIKEN full-length enriched library, clone:F730209H22 product:integrin alpha M, full insert sequence.	16409	chr7	135206153	135271674	GO:0006412(translation);GO:0007155(cell adhesion);GO:0007229(integrin-mediated signaling pathway);GO:0030593(neutrophil chemotaxis);GO:0045123(cellular extravasation);GO:0050798(activated T cell proliferation)	GO:0005622(intracellular);GO:0005634(nucleus);GO:0005840(ribosome);GO:0008305(integrin complex);GO:0009897(external side of plasma membrane);GO:0016020(membrane);GO:0016021(integral to membrane)	GO:0001846(opsonin binding);GO:0001948(glycoprotein binding);GO:0003735(structural constituent of ribosome);GO:0004872(receptor activity);GO:0005509(calcium ion binding);GO:0005515(protein binding)	Mm.262106	TC1590713	ENSMUST00000064821	42.1008	118.541	31.0266	24.7294	70.5465	109.021	102.531	144.071
AK156806	0.0430767	0.415694	2.64689	down	AK156806	Bbs12	Gm1805,Gm407,Gm721,MGC102209	Mus musculus activated spleen cDNA, RIKEN full-length enriched library, clone:F830101H05 product:hypothetical GroEL-like chaperone, ATPase containing protein, full insert sequence.	241950	chr3	37211475	37220370	GO:0006457(protein folding)		GO:0000166(nucleotide binding);GO:0005524(ATP binding);GO:0051082(unfolded protein binding)	Mm.32171	TC1601390	ENSMUST00000057975	47.0155	128.12	47.369	62.1804	31.4971	71.9904	178.456	133.913
AK157456	0.049248	0.427659	2.5327	down	AK157456	Gm830	-	Mus musculus activated spleen cDNA, RIKEN full-length enriched library, clone:F830217E06 product:unclassifiable, full insert sequence.	329892	chr4	95133459	95154084							68.4557	166.542	46.7967	50.2498	108.32	213.261	176.299	110.065
AK158785	0.00260783	0.230334	2.24524	down	AK158785	Tle3	2610103N05Rik,ESG,Grg3a,Grg3b,mKIAA1547	Mus musculus visual cortex cDNA, RIKEN full-length enriched library, clone:K430310B18 product:transducin-like enhancer of split 3, homolog of Drosophila E(spl), full insert sequence.	21887	chr9	61221341	61266304	GO:0006350(transcription);GO:0006355(regulation of transcription, DNA-dependent);GO:0007275(multicellular organismal development);GO:0007283(spermatogenesis);GO:0016055(Wnt receptor signaling pathway);GO:0030154(cell differentiation);GO:0045449(regulation of transcription)	GO:0005634(nucleus)		Mm.24255	TC1578063///TC1587872	ENSMUST00000034820	3232	7185.42	3745	2576.5	3374.5	6550.47	7683.92	7321.85
AK159389	4.46952e-05	0.128519	7.97399	down	AK159389	Fkbp5	51kDa,D17Ertd592e,Dit1,FKBP51	Mus musculus osteoclast-like cell cDNA, RIKEN full-length enriched library, clone:I420019D10 product:FK506 binding protein 5, full insert sequence.	14229	chr17	28536041	28654469	GO:0006457(protein folding)	GO:0005634(nucleus)	GO:0003755(peptidyl-prolyl cis-trans isomerase activity);GO:0005488(binding);GO:0005515(protein binding);GO:0016853(isomerase activity)	Mm.276405	TC1644747///TC1572635	ENSMUST00000079413///ENSMUST00000062167	1193.87	9524.75	1282.6	1279.98	1019.04	8931.17	11041.9	8601.2
AK159662	0.0176995	0.343033	2.8827	down	AK159662	Srpx	drs,drs-1,drs-2,mDRS-1,mDRS-2	Mus musculus osteoclast-like cell cDNA, RIKEN full-length enriched library, clone:I420027J17 product:sushi-repeat-containing protein, full insert sequence.	51795	chrX	9615102	9694787	GO:0008150(biological_process)	GO:0005615(extracellular space)	GO:0003674(molecular_function)	Mm.1927	TC1770091	ENSMUST00000044789	169.632	512.404	166.016	135.109	207.771	364.69	780.119	392.402
AK160010	0.0145227	0.323955	2.5095	down	AK160010	Xdh	XO,Xor,Xox-1,Xox1	Mus musculus osteoclast-like cell cDNA, RIKEN full-length enriched library, clone:I420044B05 product:xanthine dehydrogenase, full insert sequence.	22436	chr17	74233247	74299522	GO:0006118(electron transport);GO:0007595(lactation);GO:0030856(regulation of epithelial cell differentiation)	GO:0005777(peroxisome)	GO:0004854(xanthine dehydrogenase activity);GO:0004855(xanthine oxidase activity);GO:0005506(iron ion binding);GO:0009055(electron carrier activity);GO:0016491(oxidoreductase activity);GO:0030151(molybdenum ion binding);GO:0046872(metal ion binding);GO:0050660(FAD binding)	Mm.11223	TC1581763	ENSMUST00000024866	320.836	792.087	398.99	347.062	216.457	997.56	670.676	708.026
AK160627	0.00779186	0.277759	3.39076	down	AK160627	Ddx26b	4930535D10Rik,6330505F04Rik,D130066O12	Mus musculus 11 days embryo whole body cDNA, RIKEN full-length enriched library, clone:2700071F03 product:Hypothetical von Willebrand factor type A domain containing protein homolog [Mus musculus], full insert sequence.	236790	chrX	53708053	53748897				Mm.434800///Mm.72753	TC1585721///NP921855///TC1666499	ENSMUST00000039374	104.506	346.41	142.512	100.985	70.0198	432.328	338.314	268.588
AK161049	0.0409257	0.410204	2.52393	down	AK161049	Pear1	3110045G13Rik,Megf12	Mus musculus 0 day neonate skin cDNA, RIKEN full-length enriched library, clone:4631431A02 product:MEGF12 homolog [Mus musculus], full insert sequence.	73182	chr3	87556629	87572875				Mm.158962	NP353202///TC1578271///TC1608393	ENSMUST00000090981///ENSMUST00000079083	57.3611	131.553	95.1125	35.6728	41.2979	143.924	133.352	117.383
AK161173	0.0207681	0.351353	2.72746	down	AK161173	Tmprss2	D16Ertd61e,MGC6821	Mus musculus 0 day neonate head cDNA, RIKEN full-length enriched library, clone:4831434G08 product:transmembrane protease, serine 2, full insert sequence.	50528	chr16	97787594	97832802	GO:0006508(proteolysis)	GO:0016020(membrane);GO:0016021(integral to membrane)	GO:0004252(serine-type endopeptidase activity);GO:0005044(scavenger receptor activity);GO:0008233(peptidase activity);GO:0016787(hydrolase activity)	Mm.276145	TC1575165		57.6862	153.416	63.029	35.4501	74.5794	188.025	159.45	112.774
AK161189	0.0197586	0.347795	2.30817	down	AK161189	Acsl1	Acas,Acas1,Acs,FACS,Facl2	Mus musculus 0 day neonate head cDNA, RIKEN full-length enriched library, clone:4832421C24 product:acyl-CoA synthetase long-chain family member 1, full insert sequence.	14081	chr8	47576487	47621404	GO:0006629(lipid metabolic process);GO:0006631(fatty acid metabolic process);GO:0008152(metabolic process)	GO:0005739(mitochondrion);GO:0005777(peroxisome);GO:0016020(membrane);GO:0016021(integral to membrane)	GO:0000287(magnesium ion binding);GO:0003824(catalytic activity);GO:0004467(long-chain-fatty-acid-CoA ligase activity);GO:0016874(ligase activity)	Mm.210323	TC1576448///TC1575271	ENSMUST00000034046	739.912	1637.27	1070.32	613.558	535.857	1855.31	1584.02	1472.47
AK161216	0.0100674	0.292303	2.39523	down	AK161216	Car6	DOC1	Mus musculus 0 day neonate head cDNA, RIKEN full-length enriched library, clone:4833416H22 product:carbonic anhydrase 6, full insert sequence.	12353	chr4	149561124	149575244	GO:0006730(one-carbon compound metabolic process)	GO:0005615(extracellular space)	GO:0004089(carbonate dehydratase activity);GO:0008270(zinc ion binding);GO:0016829(lyase activity);GO:0046872(metal ion binding)	Mm.232523	TC1573909	ENSMUST00000030817	232.764	553.537	289.632	234.136	174.524	595.909	634.734	429.968
AK161485	0.0360428	0.396348	2.28648	down	AK161485	Wdfy3	2610509D04Rik,ALFY,AW319683,B930017C24,BWF1,Bchs,D5Ertd66e,Ggtb3,ZFYVE25,mKIAA0993	Mus musculus adult male testis cDNA, RIKEN full-length enriched library, clone:4932438G11 product:WD repeat and FYVE domain containing 3, full insert sequence.	72145	chr5	102264603	102280532		GO:0005635(nuclear envelope);GO:0005737(cytoplasm);GO:0005776(autophagic vacuole);GO:0019898(extrinsic to membrane)	GO:0003831(beta-N-acetylglucosaminylglycopeptide beta-1,4-galactosyltransferase activity);GO:0005545(phosphatidylinositol binding);GO:0008270(zinc ion binding);GO:0046872(metal ion binding)	Mm.332522	TC1596122///TC1579690///TC1580697	ENSMUST00000053177	138.903	321.086	146.775	172.743	97.1897	206.853	403.417	352.987
AK161975	0.0308891	0.383329	2.13419	down	AK161975	Rab3a	-	Mus musculus 10 days neonate cerebellum cDNA, RIKEN full-length enriched library, clone:6530411A02 product:RAB3A, member RAS oncogene family, full insert sequence.	19339	chr8	73278609	73282506	GO:0006810(transport);GO:0006886(intracellular protein transport);GO:0006887(exocytosis);GO:0007264(small GTPase mediated signal transduction);GO:0015031(protein transport);GO:0017157(regulation of exocytosis)	GO:0008021(synaptic vesicle);GO:0016020(membrane)	GO:0000166(nucleotide binding);GO:0003924(GTPase activity);GO:0005515(protein binding);GO:0005525(GTP binding);GO:0008565(protein transporter activity)	Mm.5083	TC1624230		588.005	1209.06	747.639	649.261	367.114	1151.03	1071.11	1405.06
AK162063	0.0241446	0.356235	2.71756	down	AK162063	4833422C13Rik	C130047M12Rik	Mus musculus adult male adrenal gland cDNA, RIKEN full-length enriched library, clone:7330427B04 product:hypothetical protein, full insert sequence.	373852	chr13	91852867	91881433							86.3572	221.274	134.324	58.1594	66.5885	232.208	255.956	175.657
AK162795	0.00534149	0.256741	2.36186	down	AK162795	Sec24a	9430090N21Rik,AI504915	Mus musculus 16 days neonate thymus cDNA, RIKEN full-length enriched library, clone:A130074A21 product:SEC24 related gene family, member A (S. cerevisiae), full insert sequence.	77371	chr11	51535191	51570336	GO:0006810(transport);GO:0006886(intracellular protein transport);GO:0006888(ER to Golgi vesicle-mediated transport);GO:0015031(protein transport)	GO:0005783(endoplasmic reticulum);GO:0030127(COPII vesicle coat)	GO:0005515(protein binding);GO:0008270(zinc ion binding)	Mm.33878	TC1586961///TC1581548///TC1602419	ENSMUST00000038210///ENSMUST00000064297	246.128	567.762	316.313	237.068	185.004	552.668	559.305	591.312
AK162858	0.00635906	0.264874	3.34086	down	AK162858	Mbd1	Cxxc3,PCM1	Mus musculus adult male hypothalamus cDNA, RIKEN full-length enriched library, clone:A230058I09 product:methyl-CpG binding domain protein 1, full insert sequence.	17190	chr18	74427957	74434532	GO:0006306(DNA methylation);GO:0006350(transcription);GO:0006355(regulation of transcription, DNA-dependent)	GO:0000785(chromatin);GO:0000792(heterochromatin);GO:0005634(nucleus)	GO:0003677(DNA binding);GO:0008270(zinc ion binding);GO:0046872(metal ion binding)	Mm.22522	TC1699912///TC1727829///TC1588047	ENSMUST00000025446	259.901	851.169	170.372	291.439	317.892	722.312	762.379	1068.82
AK163212	0.0209011	0.351353	2.02694	down	AK163212	Gm2016	-	Mus musculus 2 cells egg cDNA, RIKEN full-length enriched library, clone:B020001K04 product:Eukaryotic translation initiation factor 1A, full insert sequence.	100039042	chr12	89112519	89116307							59.0925	121.298	47.369	69.3979	60.5107	95.5565	108.365	159.972
AK163419	0.00207848	0.222178	2.32077	down	AK163419	Prei4	2310004G06Rik,2310032D16Rik,AU015213,mKIAA1434	Mus musculus 2 cells egg cDNA, RIKEN full-length enriched library, clone:B020044L20 product:Hypothetical glycerophosphoryl diester phosphodiesterase/glycosyl hydrolase homolog [Mus musculus], full insert sequence.	74182	chr2	132354818	132403984	GO:0005975(carbohydrate metabolic process);GO:0006071(glycerol metabolic process)		GO:0003824(catalytic activity);GO:0008889(glycerophosphodiester phosphodiesterase activity);GO:0016787(hydrolase activity);GO:0030246(carbohydrate binding)	Mm.211211	TC1586411///TC1625029	ENSMUST00000028822	899.462	2078.67	945.639	738.929	1013.82	1799.95	2228.49	2207.57
AK163550	0.00191603	0.216668	2.95591	down	AK163550	Vgll4	BC048841,MGC54805,VGL-4	Mus musculus adult male corpora quadrigemina cDNA, RIKEN full-length enriched library, clone:B230366A08 product:hypothetical protein, full insert sequence.	232334	chr6	114812107	114919221	GO:0006350(transcription);GO:0006355(regulation of transcription, DNA-dependent)	GO:0005634(nucleus)		Mm.268357	TC1581356	ENSMUST00000032459	80.5312	235.964	63.029	81.4961	97.0686	207.943	226.318	273.632
AK163593	0.0014708	0.198715	2.19813	down	AK163593	Zbtb4	2310026P19Rik,9230111I22Rik,mKIAA1538	Mus musculus 4 days neonate male adipose cDNA, RIKEN full-length enriched library, clone:B430111I02 product:KAISO-like zinc finger protein 1 homolog [Homo sapiens], full insert sequence.	75580	chr11	69579413	69597525	GO:0006350(transcription);GO:0006355(regulation of transcription, DNA-dependent);GO:0008150(biological_process)	GO:0005575(cellular_component);GO:0005622(intracellular)	GO:0003674(molecular_function);GO:0003676(nucleic acid binding);GO:0005515(protein binding);GO:0008270(zinc ion binding);GO:0046872(metal ion binding)	Mm.426361	TC1582469///TC1774235	ENSMUST00000100979	146.064	321.755	133.869	139.652	164.672	276.801	324.945	363.518
AK164444	0.00126681	0.1969	3.60864	down	AK164444	Dnm3	9630020E24Rik,AW061159,B230343F03Rik,C530045C17,mKIAA0820	Mus musculus 12 days embryo eyeball cDNA, RIKEN full-length enriched library, clone:D230033P10 product:weakly similar to Dynamin (Fragment) [Anopheles gambiae], full insert sequence.	103967	chr1	163946583	164064883	GO:0006412(translation);GO:0008150(biological_process)	GO:0005622(intracellular);GO:0005739(mitochondrion);GO:0005840(ribosome)	GO:0003674(molecular_function);GO:0003735(structural constituent of ribosome);GO:0003924(GTPase activity);GO:0005525(GTP binding)	Mm.441620	TC1595511///NP627256	ENSMUST00000070330	45.2519	159.53	57.7924	33.6654	44.2978	157.104	168.385	153.1
AK165273	0.0307865	0.383329	2.4387	down	AK165273	Fam172a	1110033M05Rik,2610318O14Rik,53-E6,9430037D06Rik,AF064782,pEN87	Mus musculus 6 days neonate spleen cDNA, RIKEN full-length enriched library, clone:F430007J04 product:hypothetical Endoplasmic reticulum targeting sequence containing protein, full insert sequence.	68675	chr13	77847967	78305237		GO:0005783(endoplasmic reticulum)		Mm.343005	TC1638417///TC1598578///TC1620890///TC1599035	ENSMUST00000099358///ENSMUST00000070976	190.354	443.496	232.105	230.149	108.807	534.444	371.795	424.248
AK165965	0.0375322	0.402393	3.08755	down	AK165965	Spp1	AA960535,AI790405,Apl-1,BNSP,BSPI,Bsp,ETA-1,Eta,OP,Opn,Opnl,Ric,Spp-1	Mus musculus lung RCB-0558 LLC cDNA, RIKEN full-length enriched library, clone:G730024H15 product:secreted phosphoprotein 1, full insert sequence.	20750	chr5	104864139	104870062	GO:0001503(ossification);GO:0006916(anti-apoptosis);GO:0006954(inflammatory response);GO:0007155(cell adhesion);GO:0007160(cell-matrix adhesion);GO:0030502(negative regulation of bone mineralization);GO:0030595(leukocyte chemotaxis);GO:0042088(T-helper 1 type immune response);GO:0042102(positive regulation of T cell proliferation);GO:0045637(regulation of myeloid cell differentiation);GO:0050930(…	GO:0005576(extracellular region);GO:0005578(proteinaceous extracellular matrix);GO:0005615(extracellular space);GO:0005737(cytoplasm);GO:0045177(apical part of cell)	GO:0005125(cytokine activity);GO:0005178(integrin binding);GO:0005515(protein binding);GO:0008083(growth factor activity)	Mm.288474	TC1573661	ENSMUST00000031243	67.5459	204.734	106.579	44.3518	51.7073	120.516	211.663	282.024
AK166454	0.0238898	0.355999	2.2512	down	AK166454	Prei4	2310004G06Rik,2310032D16Rik,AU015213,mKIAA1434	Mus musculus mammary gland RCB-0527 Jyg-MC(B) cDNA, RIKEN full-length enriched library, clone:G930023O06 product:Hypothetical glycerophosphoryl diester phosphodiesterase/glycosyl hydrolase homolog [Mus musculus], full insert sequence.	74182	chr2	132354818	132403984	GO:0005975(carbohydrate metabolic process);GO:0006071(glycerol metabolic process)		GO:0003824(catalytic activity);GO:0008889(glycerophosphodiester phosphodiesterase activity);GO:0016787(hydrolase activity);GO:0030246(carbohydrate binding)	Mm.211211	TC1586411///TC1625029	ENSMUST00000028822	817.713	1792.03	1082.2	827.209	543.726	1428.39	1882.53	2065.17
AK167327	0.0137138	0.321019	2.50239	down	AK167327	Fam134b	1810015C04Rik,AU015349	Mus musculus 14 days embryo liver cDNA, RIKEN full-length enriched library, clone:I530005B22 product:hypothetical protein, full insert sequence.	66270	chr15	25870456	25903442		GO:0016021(integral to membrane)		Mm.25311	TC1591249///TC1575432	ENSMUST00000022881	207.073	506.769	140.334	266.824	214.061	528.852	586.565	404.89
AK167850	0.00572559	0.261884	2.15421	down	AK167850	Cdc45l	-	Mus musculus TIB-55 BB88 cDNA, RIKEN full-length enriched library, clone:I730032K04 product:cell division cycle 45 homolog (S. cerevisiae)-like, full insert sequence.	12544	chr16	18780544	18811802	GO:0000074(regulation of progression through cell cycle);GO:0006260(DNA replication);GO:0006270(DNA replication initiation);GO:0007049(cell cycle);GO:0051301(cell division)	GO:0005634(nucleus)		Mm.1248	TC1577345	ENSMUST00000000028	172.905	366.851	130.053	188.981	199.682	387.935	334.245	378.373
AK169960	0.0324117	0.388865	3.09787	down	AK169960	Ifitm1	1110036C17Rik,MGC107121,Mil2	Mus musculus NOD-derived CD11c +ve dendritic cells cDNA, RIKEN full-length enriched library, clone:F630005O04 product:interferon induced transmembrane protein 1, full insert sequence.	68713	chr7	148154046	148155717	GO:0001756(somitogenesis);GO:0009607(response to biotic stimulus);GO:0009952(anterior/posterior pattern formation)	GO:0016021(integral to membrane)		Mm.175661	TC1734172	ENSMUST00000026564	78.4462	243.036	79.6495	109.748	45.9413	162.576	200.787	365.745
AK170106	0.000635455	0.182722	2.10628	down	AK170106	Lpl	-	Mus musculus NOD-derived CD11c +ve dendritic cells cDNA, RIKEN full-length enriched library, clone:F630017G06 product:lipoprotein lipase, full insert sequence.	16956	chr8	71404456	71408402	GO:0006629(lipid metabolic process);GO:0016042(lipid catabolic process)	GO:0005615(extracellular space);GO:0016020(membrane);GO:0042627(chylomicron)	GO:0003824(catalytic activity);GO:0004465(lipoprotein lipase activity);GO:0005319(lipid transporter activity);GO:0008201(heparin binding);GO:0016787(hydrolase activity);GO:0048503(GPI anchor binding)	Mm.1514	TC1573803///TC1777349	ENSMUST00000081237	239.925	504.604	264.542	240.898	214.335	548.008	499.875	465.93
AK170198	0.0140577	0.323467	2.1986	down	AK170198	4931406P16Rik	AA553327,mKIAA0355	Mus musculus NOD-derived CD11c +ve dendritic cells cDNA, RIKEN full-length enriched library, clone:F630027I22 product:hypothetical Glutamine-rich region profile containing protein, full insert sequence.	233103	chr7	35021732	35098541				Mm.387835	TC1574353	ENSMUST00000085592	215.759	463.732	220.838	274.416	152.024	537.068	418.311	435.818
AK170243	0.00541993	0.257606	2.05119	down	AK170243	Zfp574	A630056B21Rik	Mus musculus NOD-derived CD11c +ve dendritic cells cDNA, RIKEN full-length enriched library, clone:F630036J15 product:Hypothetical zinc finger, full insert sequence.	232976	chr7	25862283	25867497	GO:0006350(transcription);GO:0006355(regulation of transcription, DNA-dependent)	GO:0005622(intracellular);GO:0005634(nucleus)	GO:0003676(nucleic acid binding);GO:0003677(DNA binding);GO:0008270(zinc ion binding);GO:0046872(metal ion binding)	Mm.41568	TC1576382	ENSMUST00000053410	371.152	768.076	328.594	372.447	412.415	722.515	941.121	640.593
AK171642	0.0233044	0.354968	2.77371	down	AK171642	Xdh	XO,Xor,Xox-1,Xox1	Mus musculus activated spleen cDNA, RIKEN full-length enriched library, clone:F830002A19 product:xanthine dehydrogenase, full insert sequence.	22436	chr17	74246346	74258698	GO:0006118(electron transport);GO:0007595(lactation);GO:0030856(regulation of epithelial cell differentiation)	GO:0005777(peroxisome)	GO:0004854(xanthine dehydrogenase activity);GO:0004855(xanthine oxidase activity);GO:0005506(iron ion binding);GO:0009055(electron carrier activity);GO:0016491(oxidoreductase activity);GO:0030151(molybdenum ion binding);GO:0046872(metal ion binding);GO:0050660(FAD binding)	Mm.11223	TC1581763	ENSMUST00000024866	194.865	504.422	267.302	212.134	105.159	484.045	558.718	470.502
AK172078	0.00664257	0.264874	2.34397	down	AK172078	Atp6v0a1	AA959968,ATP6a1,Atp6n1,Atp6n1a,Atpv0a1,Vpp-1,Vpp1	Mus musculus activated spleen cDNA, RIKEN full-length enriched library, clone:F830035E11 product:ATPase, H+ transporting, lysosomal V0 subunit a isoform 1, full insert sequence.	11975	chr11	100870768	100906138	GO:0001701(in utero embryonic development);GO:0006367(transcription initiation from RNA polymerase II promoter);GO:0006810(transport);GO:0006811(ion transport);GO:0007420(brain development);GO:0007507(heart development);GO:0015992(proton transport);GO:0030099(myeloid cell differentiation)	GO:0005634(nucleus);GO:0005667(transcription factor complex);GO:0005737(cytoplasm);GO:0016020(membrane);GO:0016021(integral to membrane)	GO:0003682(chromatin binding);GO:0003713(transcription coactivator activity);GO:0015078(hydrogen ion transporter activity);GO:0030331(estrogen receptor binding);GO:0046965(retinoid X receptor binding);GO:0046966(thyroid hormone receptor binding)	Mm.340818///Mm.417707	TC1701710///TC1669262///TC1572050	ENSMUST00000103110	212.632	510.233	212.55	194.69	230.655	424.351	680.982	425.367
AK172551	0.0178955	0.343305	3.57263	down	AK172551	Sh2b3	AI429800,Lnk	Mus musculus activated spleen cDNA, RIKEN full-length enriched library, clone:F830213H11 product:linker of T-cell receptor pathways, full insert sequence.	16923	chr5	122267223	122286810	GO:0007242(intracellular signaling cascade);GO:0030097(hemopoiesis);GO:0030154(cell differentiation);GO:0035162(embryonic hemopoiesis)		GO:0005515(protein binding)	Mm.65493	TC1731371///TC1630474	ENSMUST00000040308///ENSMUST00000086310	117.676	379.109	199.127	81.6472	72.2544	324.303	397.788	415.236
AK172958	0.00955912	0.289742	2.78308	down	AK172958	Per1	MGC102121,Per,m-rigui,mPer1	Mus musculus mRNA for mKIAA0482 protein.	18626	chr11	68913653	68923459	GO:0000160(two-component signal transduction system (phosphorelay));GO:0006350(transcription);GO:0006355(regulation of transcription, DNA-dependent);GO:0007165(signal transduction);GO:0007623(circadian rhythm);GO:0016481(negative regulation of transcription);GO:0048511(rhythmic process)	GO:0005634(nucleus)	GO:0000155(two-component sensor activity);GO:0004871(signal transducer activity);GO:0005515(protein binding)	Mm.7373	NP1487658	ENSMUST00000102605	402.92	1078.98	488.902	466.923	252.934	1194.34	990.942	1051.66
AK173315	0.0291752	0.376506	2.84325	down	AK173315	Ttc14	2700016E08Rik,4930434D01Rik,4931403I22Rik,4933402I15Rik,AI662468,AU014779,AW561908,KIAA1980,cI-44,mKIAA1980	Mus musculus mRNA for mKIAA1980 protein.	67120	chr3	33699116	33715556			GO:0003676(nucleic acid binding);GO:0003723(RNA binding)	Mm.275710	NP748322///TC1680524///NP741610	ENSMUST00000099153	90.237	253.324	107.527	109.926	53.2581	161.856	292.78	305.336
AK177703	0.0258776	0.364356	2.96166	down	AK177703	Efr3a	A130089M23Rik,BB071175,C76891,C920006C10Rik,D030063F01Rik,KIAA0143,mKIAA0143	Mus musculus cDNA, clone:Y0G0103N05, strand:plus, reference:ENSEMBL:Mouse-Transcript-ENST:ENSMUST00000067248, based on BLAT search.	76740	chr15	65646937	65650122	GO:0016337(cell-cell adhesion)	GO:0001533(cornified envelope);GO:0005622(intracellular);GO:0005886(plasma membrane);GO:0016020(membrane)	GO:0042803(protein homodimerization activity)	Mm.260647	TC1661388///TC1682392///TC1607495///TC1572324///TC1596861///TC1590042	ENSMUST00000015146	54.9034	158.847	81.7962	35.2031	47.711	142.858	220.263	113.42
AK179700	0.0328874	0.390257	5.95073	down	AK179700	N/A	N/A	Mus musculus cDNA, clone:Y0G0111G08, strand:minus, reference:ENSEMBL:Mouse-Transcript-ENST:ENSMUST00000067762, based on BLAT search.	N/A	chr11	32542874	32611997							44.2142	239.932	82.8627	31.1441	18.6357	316.262	108.675	294.861
AK179730	0.0210221	0.351353	2.21975	down	AK179730	Itgb3bp	4930471O16Rik,AU022583	Mus musculus cDNA, clone:Y0G0111I03, strand:plus, reference:ENSEMBL:Mouse-Transcript-ENST:ENSMUST00000030277, based on BLAT search.	67733	chr4	99432092	99495809	GO:0006350(transcription);GO:0006355(regulation of transcription, DNA-dependent);GO:0006915(apoptosis)	GO:0000775(chromosome, pericentric region);GO:0005634(nucleus);GO:0005694(chromosome)		Mm.257094	TC1600598///TC1582290///TC1665963	ENSMUST00000102786	53.6994	114.076	56.6107	70.4797	34.0078	112.482	116.347	113.4
AK181416	0.0243042	0.356715	2.4021	down	AK181416	Ogdh	2210403E04Rik,2210412K19Rik,AA409584,KIAA4192,d1401,mKIAA4192	Mus musculus cDNA, clone:Y0G0118A17, strand:minus, reference:ENSEMBL:Mouse-Transcript-ENST:ENSMUST00000064907, based on BLAT search.	18293	chr11	6213790	6217083	GO:0006096(glycolysis);GO:0008152(metabolic process)	GO:0005739(mitochondrion)	GO:0004591(oxoglutarate dehydrogenase (succinyl-transferring) activity);GO:0016491(oxidoreductase activity);GO:0016624(oxidoreductase activity, acting on the aldehyde or oxo group of donors, disulfide as acceptor);GO:0030976(thiamin pyrophosphate binding)	Mm.276348	TC1716291	ENSMUST00000081894	55.4941	129.376	42.8894	80.8386	42.7544	110.27	164.794	113.064
AK182466	0.0386473	0.403287	3.17823	down	AK182466	N/A	N/A	Mus musculus cDNA, clone:Y0G0122D05, strand:minus, reference:ENSEMBL:Mouse-Transcript-ENST:ENSMUST00000038667, based on BLAT search.	N/A	chr2	179997782	180008170							50.4054	178.441	60.1638	36.3342	54.7182	107.783	113.42	314.12
AK184851	0.0246188	0.357112	2.12634	down	AK184851	N/A	N/A	Mus musculus cDNA, clone:Y0G0131L21, strand:plus, reference:ENSEMBL:Mouse-Transcript-ENST:ENSMUST00000042726, based on BLAT search.	N/A	chr7	31429844	31434738							112.377	232.447	152.56	78.4464	106.125	215.341	278.126	203.875
AK186590	0.015618	0.331575	2.12655	down	AK186590	N/A	N/A	Mus musculus cDNA, clone:Y0G0137O20, strand:plus, reference:ENSEMBL:Mouse-Transcript-ENST:ENSMUST00000037210, based on BLAT search.	N/A	chr2	71291394	71344999							58.3608	127.817	55.6818	56.066	63.3346	86.6498	157.281	139.52
AY034611	0.00677209	0.265941	2.1286	down	AY034611	Trp53inp1	2700057G22Rik,SIP,SIP18,SIP27,Stinp,Teap	alt '2700057G22Rik#SIP#SIP18#SIP27#Stinp#Teap'	60599	chr4	11083587	11101524	GO:0006915(apoptosis);GO:0006917(induction of apoptosis);GO:0006950(response to stress)	GO:0005634(nucleus);GO:0005730(nucleolus)		Mm.393018	TC1686880///TC1660258	ENSMUST00000029865	363.511	782.765	397.824	377.227	315.483	950.303	608.991	789.001
AY052560	0.0125995	0.31095	3.38547	down	AY052560	N/A	N/A	Mus musculus RNA-binding motif protein 3 mRNA, complete cds.	N/A	chrX	7719489	7722823							80.4946	262.206	119.903	69.0916	52.4896	342.089	213.378	231.149
AY219716	0.000237783	0.150986	2.10122	down	AY219716	Il15ra	AA690181	Mus musculus interleukin 15 receptor alpha chain isoform 1B (IL15ra) mRNA, complete cds	16169	chr2	11627474	11655589	GO:0007166(cell surface receptor linked signal transduction)	GO:0005615(extracellular space);GO:0005634(nucleus);GO:0005783(endoplasmic reticulum);GO:0005887(integral to plasma membrane);GO:0016020(membrane);GO:0016021(integral to membrane)	GO:0004872(receptor activity);GO:0004907(interleukin receptor activity);GO:0005515(protein binding)	Mm.200196	NP646214	ENSMUST00000078834	1391.63	2926.4	1360.71	1494.06	1320.13	2729.34	2858	3191.87
AY651928	0.0137443	0.321019	2.21757	down	AY651928	Postn	AI747096,OSF-2,Osf2,PLF,PN,Periostin,peri	alt 'AI747096#OSF-2#Osf2#PLF#PN#Periostin#peri'	50706	chr3	54165046	54194954	GO:0007155(cell adhesion);GO:0009888(tissue development);GO:0030198(extracellular matrix organization and biogenesis)	GO:0005578(proteinaceous extracellular matrix);GO:0005615(extracellular space)	GO:0005515(protein binding);GO:0008201(heparin binding)	Mm.236067	TC1720599	ENSMUST00000073012	125.922	278.887	129.846	152.573	95.3458	349.016	264.56	223.085
AY707858	0.000844603	0.194879	4.74105	down	AY707858	N/A	N/A	Mus musculus KISS1 isoform d (Kiss1) mRNA, complete cds, alternatively spliced.	N/A	chr1	135206399	135226299							44.3538	210.944	44.3982	35.6728	52.9903	160.629	244.09	228.112
BC002030	0.038346	0.402746	2.13135	down	BC002030	Ica1	69kDa,ICA69	Mus musculus islet cell autoantigen 1, mRNA (cDNA clone MGC:5919 IMAGE:3487814), complete cds.	15893	chr6	8580526	8728095	GO:0006810(transport);GO:0006836(neurotransmitter transport);GO:0046928(regulation of neurotransmitter secretion)	GO:0000139(Golgi membrane);GO:0005737(cytoplasm);GO:0005829(cytosol);GO:0016020(membrane);GO:0030667(secretory granule membrane);GO:0030672(synaptic vesicle membrane)	GO:0003674(molecular_function)	Mm.275683	TC1578280///TC1595263///TC1594153	ENSMUST00000038403	140.693	286.165	168.926	82.9072	170.247	252.535	322.565	283.394
BC002043	0.00125329	0.1969	3.75553	down	BC002043	Cdkn1a	CAP20,CDKI,CIP1,Cdkn1,P21,SDI1,Waf1,mda6,p21Cip1,p21WAF	Mus musculus cyclin-dependent kinase inhibitor 1A (P21), mRNA (cDNA clone MGC:6025 IMAGE:3495942), complete cds.	12575	chr17	29230763	29236509	GO:0000074(regulation of progression through cell cycle);GO:0006974(response to DNA damage stimulus);GO:0007049(cell cycle);GO:0007050(cell cycle arrest);GO:0008285(negative regulation of cell proliferation);GO:0009411(response to UV);GO:0030890(positive regulation of B cell proliferation);GO:0043066(negative regulation of apoptosis);GO:0043071(positive regulation of non-apoptotic programmed cell…	GO:0000307(cyclin-dependent protein kinase holoenzyme complex);GO:0005634(nucleus);GO:0005829(cytosol)	GO:0004860(protein kinase inhibitor activity);GO:0004861(cyclin-dependent protein kinase inhibitor activity);GO:0005515(protein binding);GO:0008270(zinc ion binding);GO:0016301(kinase activity);GO:0030332(cyclin binding);GO:0046872(metal ion binding)	Mm.195663	TC1572105	ENSMUST00000023829	268.003	990.011	347.538	243.261	213.21	1136.81	898.954	934.268
BC002173	0.0112469	0.302031	2.06224	down	BC002173	Rassf1	123F2,AA536941,AU044980,NORE2A,RDA32,REH3P21,Rassf1A,Rassf1B,Rassf1C	Mus musculus Ras association (RalGDS/AF-6) domain family 1, mRNA (cDNA clone MGC:7339 IMAGE:3486727), complete cds.	56289	chr9	107456986	107464591	GO:0007218(neuropeptide signaling pathway)			Mm.12091	TC1608806	ENSMUST00000010211	143.067	290.939	124.322	185.548	119.331	288.366	333.161	251.29
BC003470	0.00688922	0.268908	2.06359	down	BC003470	Pla1a	AA986889,Ps-pla1,Pspla1	Mus musculus phospholipase A1 member A, mRNA (cDNA clone MGC:6511 IMAGE:2649848), complete cds.	85031	chr16	38396202	38432968	GO:0006629(lipid metabolic process);GO:0016042(lipid catabolic process)	GO:0005615(extracellular space)	GO:0003824(catalytic activity);GO:0016787(hydrolase activity)	Mm.279805	TC1578614	ENSMUST00000002926	104.493	216.382	89.0862	102.06	122.332	193.106	265.142	190.898
BC003479	0.0441789	0.417586	2.93283	down	BC003479	Dhrs7b	BC003479,C79874,C80074,MGC6908	Mus musculus dehydrogenase/reductase (SDR family) member 7B, mRNA (cDNA clone MGC:6908 IMAGE:2655855), complete cds.	216820	chr11	60644188	60671648	GO:0008152(metabolic process)		GO:0016491(oxidoreductase activity);GO:0016740(transferase activity)	Mm.390360	TC1580859	ENSMUST00000042281	101.091	288.341	163.809	66.9644	72.5006	206.082	223.647	435.294
BC003783	0.00173471	0.209779	2.29106	down	BC003783	Cish	AI385595,CIS1,Cis,F17,F23	Mus musculus cytokine inducible SH2-containing protein, mRNA (cDNA clone MGC:6010 IMAGE:3487580), complete cds.	12700	chr9	107199227	107204293	GO:0001558(regulation of cell growth);GO:0007205(protein kinase C activation);GO:0007242(intracellular signaling cascade);GO:0009968(negative regulation of signal transduction)	GO:0005886(plasma membrane)	GO:0005515(protein binding)	Mm.4592	TC1575404	ENSMUST00000098412	607.095	1375.71	691.846	644.993	484.445	1322.29	1375.52	1429.32
BC004770	0.0012825	0.1969	5.25679	down	BC004770	Nr4a1	GFRP1,Gfrp,Hbr-1,Hbr1,Hmr,N10,NGFI-B,NGFIB,NP10,TIS1,TR3,nur77	Mus musculus nuclear receptor subfamily 4, group A, member 1, mRNA (cDNA clone MGC:7048 IMAGE:3156434), complete cds.	15370	chr15	101097296	101105225	GO:0006350(transcription);GO:0006355(regulation of transcription, DNA-dependent);GO:0006917(induction of apoptosis);GO:0043154(negative regulation of caspase activity);GO:0045449(regulation of transcription);GO:0045944(positive regulation of transcription from RNA polymerase II promoter)	GO:0005634(nucleus)	GO:0003677(DNA binding);GO:0003700(transcription factor activity);GO:0003707(steroid hormone receptor activity);GO:0004872(receptor activity);GO:0004879(ligand-dependent nuclear receptor activity);GO:0005515(protein binding);GO:0008270(zinc ion binding);GO:0030528(transcription regulator activity);GO:0046872(metal ion binding)	Mm.119	TC1779970	ENSMUST00000023779	259.693	1406.55	278.367	281.831	218.881	1259.82	1021.51	1938.32
BC005413	0.0290117	0.376342	2.65065	down	BC005413	Sult1a1	AI266890,PST,Stp,Stp1	Mus musculus sulfotransferase family 1A, phenol-preferring, member 1, mRNA (cDNA clone MGC:5691 IMAGE:3488459), complete cds.	20887	chr7	133816383	133819871	GO:0006629(lipid metabolic process);GO:0008202(steroid metabolic process)		GO:0000166(nucleotide binding);GO:0004062(aryl sulfotransferase activity);GO:0008146(sulfotransferase activity);GO:0016740(transferase activity);GO:0017067(tyrosine-ester sulfotransferase activity)	Mm.368982	TC1582276		332.929	823.776	454.345	366.921	177.523	767.667	764.291	939.37
BC005421	0.000298978	0.150986	3.0016	down	BC005421	Tbc1d8	AD3,HBLP1,VRP	Mus musculus TBC1 domain family, member 8, mRNA (cDNA clone MGC:5724 IMAGE:3594100), complete cds.	54610	chr1	39428706	39462214	GO:0006457(protein folding);GO:0008150(biological_process)	GO:0005575(cellular_component);GO:0005622(intracellular);GO:0016021(integral to membrane)	GO:0003674(molecular_function);GO:0005096(GTPase activator activity);GO:0005097(Rab GTPase activator activity)	Mm.387293	TC1576889	ENSMUST00000054462	1029.82	3077.56	1200.2	962.776	926.477	2922.23	3374.59	2935.87
BC005516	0.0332414	0.391341	2.02178	down	BC005516	Ergic1	1200007D18Rik,MGC102406,maa-136	Mus musculus endoplasmic reticulum-golgi intermediate compartment (ERGIC) 1, mRNA (cDNA clone MGC:7601 IMAGE:3494155), complete cds.	67458	chr17	26698456	26793878	GO:0006810(transport);GO:0006888(ER to Golgi vesicle-mediated transport)	GO:0005783(endoplasmic reticulum);GO:0016020(membrane);GO:0016021(integral to membrane)		Mm.30496	TC1604499///TC1617571///TC1713668	ENSMUST00000001619	349.866	683.259	451.193	225.453	372.953	725.019	741.778	582.978
BC005520	1.16424e-05	0.085193	3.66537	down	BC005520	Ehf	9030625L19Rik,AU019492	Mus musculus ets homologous factor, mRNA (cDNA clone MGC:7616 IMAGE:3494644), complete cds.	13661	chr2	103103589	103143353	GO:0006350(transcription);GO:0006355(regulation of transcription, DNA-dependent);GO:0030855(epithelial cell differentiation);GO:0045893(positive regulation of transcription, DNA-dependent)	GO:0005634(nucleus)	GO:0003677(DNA binding);GO:0003700(transcription factor activity);GO:0005515(protein binding)	Mm.10724	TC1603302///TC1578507	ENSMUST00000090475	99.6786	365.948	98.0084	97.5107	103.517	391.138	370.87	335.837
BC005566	0.00429834	0.253022	2.30638	down	BC005566	Srm	AA407669,SpdST,SpdSy	Mus musculus spermidine synthase, mRNA (cDNA clone MGC:11495 IMAGE:3966710), complete cds.	20810	chr4	147965627	147968728	GO:0008295(spermidine biosynthetic process)		GO:0003824(catalytic activity);GO:0004766(spermidine synthase activity);GO:0016740(transferase activity)	Mm.10	TC1575862	ENSMUST00000006611	1534.51	3483.21	1269.88	1961.57	1372.08	3367.02	3245.93	3836.67
BC005608	0.0111468	0.300802	2.18244	down	BC005608	Cradd	RAIDD	Mus musculus CASP2 and RIPK1 domain containing adaptor with death domain, mRNA (cDNA clone MGC:5736 IMAGE:3498522), complete cds.	12905	chr10	94637373	94785599	GO:0006508(proteolysis);GO:0006915(apoptosis);GO:0007165(signal transduction);GO:0042981(regulation of apoptosis)	GO:0005622(intracellular)	GO:0005515(protein binding);GO:0030693(caspase activity)	Mm.440591	TC1582109	ENSMUST00000053594	120.123	267.954	111.709	137.248	111.411	356.985	237.044	209.833
BC005672	0.000767424	0.191784	2.23641	down	BC005672	Sesn2	HI95,MGC11758,SEST2,Ses2	Mus musculus sestrin 2, mRNA (cDNA clone MGC:11758 IMAGE:3153129), complete cds.	230784	chr4	132048721	132066371	GO:0007050(cell cycle arrest)	GO:0005634(nucleus);GO:0005737(cytoplasm)		Mm.23608	TC1577023	ENSMUST00000030724	171.435	381.487	199.426	158.495	156.385	389.224	400.917	354.319
BC005720	0.00860111	0.280696	2.64448	down	BC005720	Sgk1	Sgk	Mus musculus serum/glucocorticoid regulated kinase, mRNA (cDNA clone MGC:11778 IMAGE:3594892), complete cds.	20393	chr10	21714510	21719699	GO:0006468(protein amino acid phosphorylation);GO:0006915(apoptosis);GO:0006974(response to DNA damage stimulus)	GO:0005634(nucleus);GO:0005783(endoplasmic reticulum)	GO:0000166(nucleotide binding);GO:0004672(protein kinase activity);GO:0004674(protein serine/threonine kinase activity);GO:0005515(protein binding);GO:0005524(ATP binding);GO:0016301(kinase activity);GO:0016740(transferase activity)	Mm.28405	TC1609075///TC1585076	ENSMUST00000020145	411.588	1054.22	463.125	501.43	270.208	1159.32	952.943	1050.4
BC006698	0.0100932	0.292303	2.19301	down	BC006698	Ctps	-	Mus musculus cytidine 5'-triphosphate synthase, mRNA (cDNA clone MGC:5946 IMAGE:3498717), complete cds.	51797	chr4	120212472	120242856	GO:0006221(pyrimidine nucleotide biosynthetic process);GO:0006241(CTP biosynthetic process);GO:0006541(glutamine metabolic process)		GO:0003824(catalytic activity);GO:0003883(CTP synthase activity);GO:0016874(ligase activity)	Mm.1815	TC1576071	ENSMUST00000030381	281.974	609.343	291.333	346.282	208.305	685.801	516.43	625.799
BC006759	0.00130093	0.1969	2.9644	down	BC006759	Sh2b3	AI429800,Lnk	Mus musculus SH2B adaptor protein 3, mRNA (cDNA clone MGC:11404 IMAGE:3709861), complete cds.	16923	chr5	122267223	122286810	GO:0007242(intracellular signaling cascade);GO:0030097(hemopoiesis);GO:0030154(cell differentiation);GO:0035162(embryonic hemopoiesis)		GO:0005515(protein binding)	Mm.65493	TC1731371///TC1630474	ENSMUST00000040308///ENSMUST00000086310	63.7933	190.188	70.4113	66.8293	54.1394	181.7	230.208	158.657
BC006783	0.00146263	0.198715	5.1372	down	BC006783	Ctgf	Ccn2,Fisp12,Hcs24,fisp-12	Mus musculus connective tissue growth factor, mRNA (cDNA clone MGC:8122 IMAGE:3589136), complete cds.	14219	chr10	24315326	24318488	GO:0001502(cartilage condensation);GO:0001503(ossification);GO:0001525(angiogenesis);GO:0001558(regulation of cell growth);GO:0006260(DNA replication);GO:0007155(cell adhesion);GO:0007160(cell-matrix adhesion);GO:0007229(integrin-mediated signaling pathway);GO:0008543(fibroblast growth factor receptor signaling pathway);GO:0016477(cell migration);GO:0030154(cell differentiation)	GO:0005576(extracellular region);GO:0005578(proteinaceous extracellular matrix);GO:0005615(extracellular space)	GO:0005178(integrin binding);GO:0005515(protein binding);GO:0005520(insulin-like growth factor binding);GO:0008201(heparin binding)	Mm.393058	TC1694511	ENSMUST00000020171	263.662	1322.77	361.042	235.017	194.927	1370.33	1073.14	1524.85
BC006789	7.16182e-05	0.13787	4.05363	down	BC006789	Ehf	9030625L19Rik,AU019492	Mus musculus ets homologous factor, mRNA (cDNA clone MGC:8140 IMAGE:3589528), complete cds.	13661	chr2	103103589	103143333	GO:0006350(transcription);GO:0006355(regulation of transcription, DNA-dependent);GO:0030855(epithelial cell differentiation);GO:0045893(positive regulation of transcription, DNA-dependent)	GO:0005634(nucleus)	GO:0003677(DNA binding);GO:0003700(transcription factor activity);GO:0005515(protein binding)	Mm.10724	TC1603302///TC1578507	ENSMUST00000090475	405.043	1631.07	470.317	356.882	387.928	1639.69	1662.4	1591.11
BC006904	0.0131875	0.315706	2.16258	down	BC006904	Ltf	Csp82,Lf,MMS10R,Ms10r	Mus musculus lactotransferrin, mRNA (cDNA clone MGC:11944 IMAGE:3600033), complete cds.	17002	chr9	110921812	110944817	GO:0006810(transport);GO:0006811(ion transport);GO:0006826(iron ion transport);GO:0006879(iron ion homeostasis)	GO:0005576(extracellular region);GO:0005615(extracellular space)	GO:0004252(serine-type endopeptidase activity);GO:0005506(iron ion binding);GO:0008199(ferric iron binding);GO:0008233(peptidase activity);GO:0016787(hydrolase activity);GO:0046872(metal ion binding)	Mm.282359	TC1712837///TC1731671	ENSMUST00000035077	198.455	429.696	179.12	249.594	166.652	331.277	435.489	522.322
BC006950	0.00400923	0.253022	2.60948	down	BC006950	Ier3	AI663993,IEX-1,cI-3,gly96	Mus musculus immediate early response 3, mRNA (cDNA clone MGC:6933 IMAGE:2811734), complete cds.	15937	chr17	35958657	35959856		GO:0016020(membrane);GO:0016021(integral to membrane)		Mm.25613	TC1771440	ENSMUST00000003635	445.518	1153.88	336.91	498.006	501.639	1044.72	1038.61	1378.3
BC006967	0.0169077	0.337311	2.47095	down	BC006967	Dusp1	3CH134,Ptpn16,U19515,erp,mkp-1	Mus musculus dual specificity phosphatase 1, mRNA (cDNA clone MGC:6265 IMAGE:3589849), complete cds.	19252	chr17	26642535	26645404	GO:0006470(protein amino acid dephosphorylation);GO:0007049(cell cycle);GO:0016311(dephosphorylation)		GO:0004721(phosphoprotein phosphatase activity);GO:0004725(protein tyrosine phosphatase activity);GO:0005515(protein binding);GO:0008138(protein tyrosine/serine/threonine phosphatase activity);GO:0016787(hydrolase activity);GO:0016791(phosphoric monoester hydrolase activity);GO:0017017(MAP kinase phosphatase activity)	Mm.239041	TC1574874	ENSMUST00000025025	1199.84	2841.13	1358.41	1503.71	737.42	2946.18	3039.62	2537.6
BC008231	0.0340256	0.391473	2.39236	down	BC008231	Pqlc1	2310009N05Rik,4933425L21Rik,5730564E11Rik,C78974	Mus musculus PQ loop repeat containing 1, mRNA (cDNA clone MGC:6795 IMAGE:2647794), complete cds.	66943	chr18	80453022	80489455		GO:0016020(membrane);GO:0016021(integral to membrane)		Mm.29247	TC1593398///TC1594089	ENSMUST00000070135///ENSMUST00000091798	57.6496	129.98	63.501	77.2831	32.1647	136.469	141.71	111.761
BC008544	0.0229104	0.352844	2.23854	down	BC008544	Pus7	C330017I15Rik	Mus musculus pseudouridylate synthase 7 homolog (S. cerevisiae), mRNA (cDNA clone MGC:7703 IMAGE:3497634), complete cds.	78697	chr5	23246718	23289483	GO:0006260(DNA replication);GO:0006281(DNA repair);GO:0006310(DNA recombination);GO:0008033(tRNA processing)		GO:0003910(DNA ligase (ATP) activity);GO:0004730(pseudouridylate synthase activity);GO:0005524(ATP binding)	Mm.58660	TC1578310	ENSMUST00000072492	155.124	340.73	177.486	185.232	102.654	424.771	308.839	288.58
BC008980	0.00410594	0.253022	2.11508	down	BC008980	Dhrs3	Rsdr1,retSDR1	Mus musculus dehydrogenase/reductase (SDR family) member 3, mRNA (cDNA clone MGC:8049 IMAGE:3587135), complete cds.	20148	chr4	144482729	144517545	GO:0008152(metabolic process)	GO:0005615(extracellular space);GO:0016020(membrane);GO:0016021(integral to membrane)	GO:0016491(oxidoreductase activity)	Mm.14063	NP715297	ENSMUST00000084184	191.463	400.389	234.143	156.706	183.541	435.088	399.297	366.78
BC009002	0.0186858	0.345236	2.08999	down	BC009002	Rnd3	2610017M01Rik,AI661404,Arhe,Rhoe	Mus musculus Rho family GTPase 3, mRNA (cDNA clone MGC:6381 IMAGE:3500586), complete cds.	74194	chr2	50986899	51004605	GO:0007015(actin filament organization);GO:0007155(cell adhesion);GO:0007264(small GTPase mediated signal transduction)	GO:0005622(intracellular);GO:0016020(membrane)	GO:0000166(nucleotide binding);GO:0003924(GTPase activity);GO:0005525(GTP binding)	Mm.46497	TC1575622///TC1624021///TC1651925	ENSMUST00000017288	196.795	399.409	256.203	136.181	198.002	355.528	409.252	433.448
BC009805	0.00732423	0.274018	2.82914	down	BC009805	N/A	N/A	Mus musculus glutathione S-transferase, alpha 3, mRNA (cDNA clone MGC:13726 IMAGE:4210324), complete cds.	N/A	chr1	21239831	21255292							176.03	477.135	249.998	125.478	152.614	471.976	500.564	458.865
BC010675	0.0326878	0.389993	2.2204	down	BC010675	Serpine2	B230326M24Rik,PAI-1,PI7,PN-1,Spi4	Mus musculus serine (or cysteine) peptidase inhibitor, clade E, member 2, mRNA (cDNA clone MGC:11797 IMAGE:3595407), complete cds.	20720	chr1	79791110	79855196	GO:0007275(multicellular organismal development);GO:0007399(nervous system development);GO:0030154(cell differentiation)	GO:0005615(extracellular space)	GO:0004866(endopeptidase inhibitor activity);GO:0004867(serine-type endopeptidase inhibitor activity);GO:0008201(heparin binding)	Mm.3093	NP577421	ENSMUST00000027467	101.196	219.206	137.627	66.7101	99.2505	274.32	172.525	210.773
BC010750	0.0178871	0.343305	3.14289	down	BC010750	Pgam2	-	Mus musculus phosphoglycerate mutase 2, mRNA (cDNA clone MGC:18358 IMAGE:4235174), complete cds.	56012	chr11	5701642	5703704	GO:0006096(glycolysis);GO:0008152(metabolic process)		GO:0003824(catalytic activity);GO:0004082(bisphosphoglycerate mutase activity);GO:0004083(bisphosphoglycerate phosphatase activity);GO:0004619(phosphoglycerate mutase activity);GO:0016787(hydrolase activity);GO:0016853(isomerase activity);GO:0016868(intramolecular transferase activity, phosphotransferases)	Mm.219627	TC1578210	ENSMUST00000020768	55.7644	160.801	90.7913	39.9689	36.5331	179.146	155.801	147.457
BC010758	0.00964591	0.28977	2.80147	down	BC010758	Cbr2	MLCR	Mus musculus carbonyl reductase 2, mRNA (cDNA clone MGC:18465 IMAGE:4219349), complete cds.	12409	chr11	120590802	120593295	GO:0006116(NADH oxidation);GO:0008152(metabolic process)	GO:0005739(mitochondrion)	GO:0004090(carbonyl reductase (NADPH) activity);GO:0005515(protein binding);GO:0016491(oxidoreductase activity)	Mm.21454	TC1576455	ENSMUST00000026148	405.559	1124.84	547.719	309.261	359.698	1437.7	890.661	1046.16
BC010770	0.0453561	0.42141	2.26134	down	BC010770	Sst	SOM,SRIF,SS,Smst	Mus musculus somatostatin, mRNA (cDNA clone MGC:18606 IMAGE:4218815), complete cds.	20604	chr16	23889664	23890920	GO:0030334(regulation of cell migration)	GO:0005576(extracellular region);GO:0005615(extracellular space)	GO:0005179(hormone activity)	Mm.2453	TC1578163	ENSMUST00000004480	46.7554	97.6635	41.1173	72.0041	27.1447	100.049	92.2299	100.711
BC010771	0.00401284	0.253022	3.20941	down	BC010771	Bmp7	OP1	Mus musculus bone morphogenetic protein 7, mRNA (cDNA clone MGC:18610 IMAGE:4218495), complete cds.	12162	chr2	172695188	172765794	GO:0001503(ossification);GO:0001707(mesoderm formation);GO:0001822(kidney development);GO:0007275(multicellular organismal development);GO:0007389(pattern specification process);GO:0007411(axon guidance);GO:0007435(salivary gland morphogenesis);GO:0009887(organ morphogenesis);GO:0030154(cell differentiation);GO:0030509(BMP signaling pathway);GO:0035239(tube morphogenesis);GO:0040007(growth);GO:00…	GO:0005615(extracellular space)	GO:0005125(cytokine activity);GO:0005515(protein binding);GO:0008083(growth factor activity)	Mm.595	TC1581559	ENSMUST00000009143	95.4494	298.097	129.99	85.8483	70.5096	266.95	282.865	344.475
BC011110	0.00205532	0.221623	2.01831	down	BC011110	Amd1	AdoMetDC,Amd-1,MGC102468,MGC91044,SAMDC	Mus musculus S-adenosylmethionine decarboxylase 1, mRNA (cDNA clone MGC:18320 IMAGE:3672700), complete cds.	11702	chr10	40007263	40021978	GO:0001701(in utero embryonic development);GO:0006597(spermine biosynthetic process);GO:0008295(spermidine biosynthetic process)		GO:0004014(adenosylmethionine decarboxylase activity);GO:0005515(protein binding);GO:0016829(lyase activity);GO:0016831(carboxy-lyase activity)	Mm.253533	TC1572004		1774.14	3584.39	2008.2	1622.29	1691.92	3737.64	3931.32	3084.21
BC011298	0.0288245	0.376175	2.31328	down	BC011298	Loxl3	Lor2,Loxl2	Mus musculus lysyl oxidase-like 3, mRNA (cDNA clone MGC:19423 IMAGE:3488978), complete cds.	16950	chr6	82984223	83001318		GO:0005615(extracellular space);GO:0016020(membrane)	GO:0004720(protein-lysine 6-oxidase activity);GO:0005044(scavenger receptor activity);GO:0005507(copper ion binding);GO:0016491(oxidoreductase activity);GO:0046872(metal ion binding)	Mm.380433	TC1578178	ENSMUST00000000707	72.7524	161.512	102.314	69.6139	46.3295	176.722	129.967	177.848
BC011473	0.0027091	0.234804	4.78244	down	BC011473	Ren2	Ren,Ren-2,Ren-B,Rn-2,Rnr	Mus musculus renin 2 tandem duplication of Ren1, mRNA (cDNA clone MGC:18521 IMAGE:4165191), complete cds.	19702	chr1	135247268	135256896	GO:0006508(proteolysis)		GO:0004190(aspartic-type endopeptidase activity);GO:0004194(pepsin A activity);GO:0004195(renin activity);GO:0008233(peptidase activity);GO:0016787(hydrolase activity)	Mm.220955			131.117	596.473	176.144	79.8395	137.369	566.549	581.905	640.965
BC012310	0.00815694	0.279466	2.02735	down	BC012310	Ammecr1l	5430429D03Rik,AU022236,AU040755,AW111353,E230022H04Rik,MGC32132	Mus musculus AMME chromosomal region gene 1-like, mRNA (cDNA clone IMAGE:3500900), with apparent retained intron.	225339	chr18	31921433	31942383				Mm.392058///Mm.290804	TC1572113///TC1614729///TC1599217///TC1614980	ENSMUST00000048298	176.97	354.283	224.868	154.828	151.215	339.098	401.68	322.071
BC012705	0.000313272	0.150986	2.0574	down	BC012705	Btg3	ANA,tob5	Mus musculus B-cell translocation gene 3, mRNA (cDNA clone MGC:13981 IMAGE:3980599), complete cds.	12228	chr16	78360110	78376983	GO:0008285(negative regulation of cell proliferation);GO:0045930(negative regulation of progression through mitotic cell cycle)	GO:0005737(cytoplasm)	GO:0005515(protein binding)	Mm.2823	TC1641046	ENSMUST00000023570	497.568	1021.26	547.889	493.114	451.7	1069.34	973.243	1021.19
BC012712	0.00776877	0.277759	4.16417	down	BC012712	Hspa4l	94kDa,AI461691,APG-1,MGC117843,Osp94	Mus musculus heat shock protein 4 like, mRNA (cDNA clone MGC:14013 IMAGE:4190161), complete cds.	18415	chr3	40549475	40593399	GO:0006457(protein folding);GO:0006986(response to unfolded protein)	GO:0005634(nucleus);GO:0005737(cytoplasm)	GO:0000166(nucleotide binding);GO:0005524(ATP binding)	Mm.39330	TC1588057///TC1576803///TC1721663	ENSMUST00000077083	254.387	1005.4	387.07	214.969	161.122	1028.72	1209.37	778.121
BC013459	0.000959718	0.195563	2.16801	down	BC013459	Bmp4	Bmp-4,Bmp2b,Bmp2b-1,Bmp2b1	Mus musculus bone morphogenetic protein 4, mRNA (cDNA clone MGC:18646 IMAGE:4219098), complete cds.	12159	chr14	47003394	47010251	GO:0001501(skeletal development);GO:0001503(ossification);GO:0001525(angiogenesis);GO:0001649(osteoblast differentiation);GO:0001656(metanephros development);GO:0001657(ureteric bud development);GO:0001934(positive regulation of protein amino acid phosphorylation);GO:0007275(multicellular organismal development);GO:0007281(germ cell development);GO:0007500(mesodermal cell fate determination);GO:0…	GO:0005615(extracellular space)	GO:0005125(cytokine activity);GO:0005515(protein binding);GO:0008083(growth factor activity);GO:0008201(heparin binding)	Mm.6813	TC1596765	ENSMUST00000074077	134.2	288.784	158.264	119.743	124.591	297.342	289.396	279.614
BC013482	0.0358306	0.395758	2.24252	down	BC013482	Akr1c14	9030611N15Rik,AW557061	Mus musculus aldo-keto reductase family 1, member C14, mRNA (cDNA clone MGC:18906 IMAGE:4240772), complete cds.	105387	chr13	4058836	4089668			GO:0016491(oxidoreductase activity);GO:0047042(3-alpha-hydroxysteroid dehydrogenase (B-specific) activity)	Mm.26838	TC1580904	ENSMUST00000041768	126.999	294.8	98.5852	151.747	130.666	287.86	186.989	409.55
BC013673	0.000505384	0.174949	2.54344	down	BC013673	Pvr	3830421F03Rik,CD155,D7Ertd458e,HVED,PVS,Taa1,Tage4,mE4,necl-5	Mus musculus poliovirus receptor, mRNA (cDNA clone MGC:18785 IMAGE:4188634), complete cds.	52118	chr7	20488926	20506449	GO:0016337(cell-cell adhesion);GO:0016477(cell migration)	GO:0005575(cellular_component)	GO:0004872(receptor activity);GO:0005515(protein binding)	Mm.227506	TC1576466///TC1602216///TC1756958	ENSMUST00000043517	132.511	334.347	134.725	151.636	111.171	339.764	332.638	330.638
BC013751	0.032029	0.387866	2.79599	down	BC013751	Alox12e	8-LOX,AW259591,Alox12-ps1,Alox12-ps2,Aloxe,e-LOX1	Mus musculus arachidonate lipoxygenase, epidermal, mRNA (cDNA clone MGC:11467 IMAGE:3596809), complete cds.	11685	chr11	70129112	70136000	GO:0006118(electron transport);GO:0006691(leukotriene metabolic process);GO:0019370(leukotriene biosynthetic process)		GO:0004052(arachidonate 12-lipoxygenase activity);GO:0005506(iron ion binding);GO:0016165(lipoxygenase activity);GO:0016491(oxidoreductase activity);GO:0016702(oxidoreductase activity, acting on single donors with incorporation of molecular oxygen, incorporation of two atoms of oxygen);GO:0046872(metal ion binding)	Mm.274093	NP047869	ENSMUST00000019051	69.5078	200.529	55.9219	97.2063	55.3952	176.465	123.774	301.348
BC013783	0.0039034	0.253022	3.25702	down	BC013783	Slc28a3	Cnt3	Mus musculus solute carrier family 28 (sodium-coupled nucleoside transporter), member 3, mRNA (cDNA clone MGC:11959 IMAGE:3600786), complete cds.	114304	chr13	58654668	58712229	GO:0006605(protein targeting);GO:0006810(transport);GO:0015860(purine nucleoside transport);GO:0015864(pyrimidine nucleoside transport)	GO:0005887(integral to plasma membrane);GO:0016020(membrane)	GO:0001882(nucleoside binding);GO:0005415(nucleoside:sodium symporter activity);GO:0015389(pyrimidine- and adenine-specific:sodium symporter activity);GO:0015390(purine-specific nucleoside:sodium symporter activity)	Mm.18188	TC1579677	ENSMUST00000022036	241.738	758.603	341.41	196.046	187.758	823.507	720.195	732.106
BC014296	0.0380679	0.402746	2.52932	down	BC014296	Cdkn1b	AA408329,AI843786,Kip1,p27,p27Kip1	Mus musculus cyclin-dependent kinase inhibitor 1B, mRNA (cDNA clone MGC:14079 IMAGE:4193493), complete cds.	12576	chr6	134870447	134874327	GO:0007049(cell cycle);GO:0007050(cell cycle arrest);GO:0007605(sensory perception of sound);GO:0008284(positive regulation of cell proliferation);GO:0008285(negative regulation of cell proliferation);GO:0031116(positive regulation of microtubule polymerization);GO:0045736(negative regulation of cyclin-dependent protein kinase activity);GO:0050680(negative regulation of epithelial cell proliferat…	GO:0005634(nucleus);GO:0005737(cytoplasm);GO:0005829(cytosol)	GO:0004860(protein kinase inhibitor activity);GO:0004861(cyclin-dependent protein kinase inhibitor activity);GO:0005515(protein binding);GO:0016301(kinase activity)	Mm.2958	TC1583217	ENSMUST00000067327///ENSMUST00000003115	109.115	265.694	146.193	61.659	119.494	197.26	339.787	260.036
BC014688	0.0210978	0.351353	2.44723	down	BC014688	Ppan	A230087P06Rik,SSF1	Mus musculus peter pan homolog (Drosophila), mRNA (cDNA clone MGC:25669 IMAGE:4489442), complete cds.	235036	chr9	20692700	20696622	GO:0001560(regulation of cell growth by extracellular stimulus)	GO:0005634(nucleus)	GO:0003674(molecular_function)	Mm.2930	TC1607595	ENSMUST00000004203	126.155	300.007	154.898	144.359	79.2084	325.594	339.787	234.639
BC014728	0.00354712	0.252186	3.88503	down	BC014728	Tmem38a	1110001E17Rik,AI413399,TRIC-A,mg33a	Mus musculus transmembrane protein 38A, mRNA (cDNA clone MGC:25675 IMAGE:4504294), complete cds.	74166	chr8	75095988	75110189		GO:0016020(membrane);GO:0016021(integral to membrane)		Mm.212927	TC1575849	ENSMUST00000034244	33.3091	127.656	22.6672	37.294	39.966	132.945	151.962	98.0622
BC014749	0.0427694	0.415571	2.02432	down	BC014749	Fbxo25	9130015I06Rik,AI649137,Fbx25	Mus musculus F-box protein 25, mRNA (cDNA clone MGC:25973 IMAGE:4240953), complete cds.	66822	chr8	13907819	13940522	GO:0006512(ubiquitin cycle);GO:0008150(biological_process)	GO:0005575(cellular_component);GO:0005634(nucleus)	GO:0003674(molecular_function)	Mm.37950	TC1649065///TC1577388	ENSMUST00000043520	214.444	413.891	311.267	142.239	189.825	363.038	470.343	408.293
BC014804	0.000398397	0.159397	3.70063	down	BC014804	Rorc	Nr1f3,RORgamma,TOR,Thor	Mus musculus RAR-related orphan receptor gamma, mRNA (cDNA clone MGC:25220 IMAGE:4489193), complete cds.	19885	chr3	94176772	94201568	GO:0006350(transcription);GO:0006355(regulation of transcription, DNA-dependent);GO:0006468(protein amino acid phosphorylation);GO:0030154(cell differentiation);GO:0048535(lymph node development)	GO:0005634(nucleus)	GO:0003677(DNA binding);GO:0003700(transcription factor activity);GO:0003707(steroid hormone receptor activity);GO:0004872(receptor activity);GO:0004879(ligand-dependent nuclear receptor activity);GO:0008270(zinc ion binding);GO:0046872(metal ion binding)	Mm.4372	TC1582154	ENSMUST00000029795	285.847	1048.21	340.878	234.136	282.527	1023.16	1151.76	969.721
BC014877	0.048619	0.427659	2.83966	down	BC014877	Acta1	AA959943,Acta-2,Acts,Actsk-1	Mus musculus actin, alpha 1, skeletal muscle, mRNA (cDNA clone MGC:18923 IMAGE:3587657), complete cds.	11459	chr8	126415666	126418636	GO:0006936(muscle contraction);GO:0007010(cytoskeleton organization and biogenesis);GO:0007517(muscle development);GO:0030240(muscle thin filament assembly)	GO:0001725(stress fiber);GO:0005856(cytoskeleton);GO:0005865(striated muscle thin filament);GO:0005884(actin filament);GO:0015629(actin cytoskeleton)	GO:0000166(nucleotide binding);GO:0003774(motor activity);GO:0005198(structural molecule activity);GO:0005200(structural constituent of cytoskeleton);GO:0005515(protein binding);GO:0005524(ATP binding);GO:0017022(myosin binding)	Mm.214950	TC1692392	ENSMUST00000034453	96.8227	254.88	103.028	45.9819	141.458	273.912	310.03	180.698
BC015086	0.00214344	0.223266	3.01698	down	BC015086	Glul	GS,Glns	Mus musculus glutamate-ammonia ligase (glutamine synthetase), mRNA (cDNA clone MGC:14045 IMAGE:4224865), complete cds.	14645	chr1	155747085	155755414	GO:0006542(glutamine biosynthetic process);GO:0006807(nitrogen compound metabolic process)	GO:0005739(mitochondrion)	GO:0004356(glutamate-ammonia ligase activity);GO:0016874(ligase activity)	Mm.210745	TC1687691///TC1573428	ENSMUST00000102516	987.46	2951.98	1217.48	968.83	776.07	2923.27	3413.44	2519.23
BC015261	0.0468541	0.423982	2.73727	down	BC015261	Nr1h4	AI957360,Fxr,HRR1,RIP14,Rxrip14	Mus musculus nuclear receptor subfamily 1, group H, member 4, mRNA (cDNA clone MGC:18424 IMAGE:4241705), complete cds.	20186	chr10	88917220	88969374	GO:0006350(transcription);GO:0006355(regulation of transcription, DNA-dependent);GO:0008206(bile acid metabolic process)	GO:0005634(nucleus)	GO:0003677(DNA binding);GO:0003700(transcription factor activity);GO:0003707(steroid hormone receptor activity);GO:0004872(receptor activity);GO:0004879(ligand-dependent nuclear receptor activity);GO:0005515(protein binding);GO:0008270(zinc ion binding);GO:0046872(metal ion binding)	Mm.3095	TC1582434	ENSMUST00000058126	83.4205	212.819	55.5519	139.533	55.1768	157.911	286.986	193.558
BC016192	0.0468161	0.423982	3.33566	down	BC016192	Bicd1	B830009D06Rik,KIAA4125,mKIAA4125	Mus musculus bicaudal D homolog 1 (Drosophila), mRNA (cDNA clone MGC:27566 IMAGE:4483840), complete cds.	12121	chr6	149357802	149505423				Mm.177181	TC1582579	ENSMUST00000003544	72.3967	199.311	138.931	40.0625	38.1966	191.032	194.12	212.78
BC016562	0.0079584	0.278174	2.58727	down	BC016562	1810011O10Rik	1110065B09Rik,AW121743,AW321058	Mus musculus RIKEN cDNA 1810011O10 gene, mRNA (cDNA clone MGC:29008 IMAGE:3154083), complete cds.	69068	chr8	25548086	25549375				Mm.25775	TC1579520		224.365	565.664	260.406	261.098	151.591	491.691	614.519	590.78
BC016884	0.0469216	0.423982	5.26006	down	BC016884	Frzb	Frp,Sfrp3,frezzled,fritz,frzb-1	Mus musculus frizzled-related protein, mRNA (cDNA clone MGC:18388 IMAGE:4237554), complete cds.	20378	chr2	80252124	80287400	GO:0007275(multicellular organismal development);GO:0016055(Wnt receptor signaling pathway);GO:0030154(cell differentiation);GO:0030178(negative regulation of Wnt receptor signaling pathway)	GO:0005576(extracellular region);GO:0005615(extracellular space)	GO:0017147(Wnt-protein binding)	Mm.427436	TC1576425	ENSMUST00000028389	62.7186	247.232	135.883	25.42	26.8526	318.076	162.574	261.047
BC016899	0.00725823	0.274018	3.18819	down	BC016899	Ehhadh	1300002P22Rik,HD,L-PBE,LBFP,LBP,MFP,MFP1,PBFE	Mus musculus enoyl-Coenzyme A, hydratase/3-hydroxyacyl Coenzyme A dehydrogenase, mRNA (cDNA clone MGC:19225 IMAGE:4241677), complete cds.	74147	chr16	21761363	21787869	GO:0006629(lipid metabolic process);GO:0006631(fatty acid metabolic process);GO:0006635(fatty acid beta-oxidation);GO:0006637(acyl-CoA metabolic process);GO:0008152(metabolic process)	GO:0005739(mitochondrion);GO:0005777(peroxisome)	GO:0003824(catalytic activity);GO:0003857(3-hydroxyacyl-CoA dehydrogenase activity);GO:0004165(dodecenoyl-CoA delta-isomerase activity);GO:0004300(enoyl-CoA hydratase activity);GO:0016491(oxidoreductase activity);GO:0016829(lyase activity);GO:0016853(isomerase activity);GO:0050662(coenzyme binding)	Mm.28100	TC1576189	ENSMUST00000023559	70.9268	216.166	104.305	55.0938	53.3819	202.674	248.224	197.601
BC017517	0.00370111	0.253022	2.66429	down	BC017517	Usp2	B930035K21Rik,Ubp41	Mus musculus ubiquitin specific peptidase 2, mRNA (cDNA clone MGC:27630 IMAGE:4506362), complete cds.	53376	chr9	43877532	43902055	GO:0006511(ubiquitin-dependent protein catabolic process);GO:0006512(ubiquitin cycle)		GO:0004221(ubiquitin thiolesterase activity);GO:0008233(peptidase activity);GO:0008234(cysteine-type peptidase activity);GO:0016787(hydrolase activity)	Mm.272770	TC1596783///TC1598825	ENSMUST00000034508	1533.56	4073.81	1809.68	1591.76	1199.24	3443.75	3849.65	4928.02
BC017530	0.00119789	0.1969	2.01761	down	BC017530	Bysl	Bys,Enp1	Mus musculus bystin-like, mRNA (cDNA clone MGC:27710 IMAGE:4925307), complete cds.	53414	chr17	47738185	47748156	GO:0007155(cell adhesion)	GO:0005575(cellular_component)	GO:0003674(molecular_function);GO:0005515(protein binding)	Mm.27291	TC1574380	ENSMUST00000024783	466.015	935.19	474.268	524.689	399.088	882.172	978.172	945.226
BC017649	0.0295359	0.378208	2.11986	down	BC017649	E130308A19Rik	MGC47072	Mus musculus RIKEN cDNA E130308A19 gene, mRNA (cDNA clone MGC:28996 IMAGE:4924105), complete cds.	230259	chr4	59639315	59766175				Mm.45688	TC1580421///TC1585957	ENSMUST00000070150///ENSMUST00000052420	532.191	1090.01	682.558	338.965	575.048	1278.38	1011.56	980.091
BC018200	0.0469765	0.424148	2.13872	down	BC018200	Safb	3110021E02Rik,5330423C17Rik,AU018122,D18386,E130307D12,HAP,HET,SAFB1	Mus musculus scaffold attachment factor B, mRNA (cDNA clone IMAGE:4038886), with apparent retained intron.	224903	chr17	56724428	56735293	GO:0030520(estrogen receptor signaling pathway);GO:0040007(growth);GO:0042445(hormone metabolic process)	GO:0005575(cellular_component)	GO:0000166(nucleotide binding);GO:0003674(molecular_function);GO:0003676(nucleic acid binding)	Mm.255066	TC1773265	ENSMUST00000095224	42.824	95.5117	47.9027	47.9362	32.6331	79.728	142.104	64.7029
BC018387	0.0358303	0.395758	2.0116	down	BC018387	Ccdc77	2400002C23Rik,2700091N06Rik,AV168274	Mus musculus coiled-coil domain containing 77, mRNA (cDNA clone MGC:25734 IMAGE:3982552), complete cds.	67200	chr6	120274715	120307378				Mm.45767	NP355600///TC1583725	ENSMUST00000032283	97.865	186.874	144.543	70.5026	78.5495	194.303	179.517	186.803
BC019203	0.035701	0.395472	2.04782	down	BC019203	Vnn1	V-1	Mus musculus vanin 1, mRNA (cDNA clone MGC:29064 IMAGE:5041670), complete cds.	22361	chr10	23614678	23624635	GO:0006807(nitrogen compound metabolic process)	GO:0005615(extracellular space);GO:0016020(membrane)	GO:0016787(hydrolase activity);GO:0016810(hydrolase activity, acting on carbon-nitrogen (but not peptide) bonds);GO:0016811(hydrolase activity, acting on carbon-nitrogen (but not peptide) bonds, in linear amides);GO:0048503(GPI anchor binding)	Mm.27154	TC1581156	ENSMUST00000041416	1493.38	3055.52	1964.08	1384.72	1131.35	3344.55	3668.28	2153.74
BC019376	0.0235586	0.35558	3.1463	down	BC019376	Hgfac	HGFA	Mus musculus hepatocyte growth factor activator, mRNA (cDNA clone MGC:30305 IMAGE:5134851), complete cds.	54426	chr5	35384236	35391063	GO:0006508(proteolysis)	GO:0005576(extracellular region);GO:0005615(extracellular space)	GO:0004252(serine-type endopeptidase activity);GO:0005515(protein binding);GO:0008233(peptidase activity);GO:0016787(hydrolase activity)	Mm.27369	TC1580240	ENSMUST00000030985	40.0743	123.77	23.1783	43.5163	53.5284	169.029	84.3767	117.905
BC019483	0.0296725	0.378476	2.64728	down	BC019483	Cth	0610010I13Rik,AI314617,BC019483,Cys3,MGC28655	Mus musculus cystathionase (cystathionine gamma-lyase), mRNA (cDNA clone MGC:28655 IMAGE:4235178), complete cds.	107869	chr3	157557386	157588013	GO:0006520(amino acid metabolic process);GO:0008652(amino acid biosynthetic process);GO:0019344(cysteine biosynthetic process)	GO:0005575(cellular_component)	GO:0004123(cystathionine gamma-lyase activity);GO:0016829(lyase activity);GO:0030170(pyridoxal phosphate binding)	Mm.28301	TC1578221		84.4116	208.203	120.241	87.4213	45.5722	191.471	238.616	194.522
BC019745	0.000803481	0.19433	3.41162	down	BC019745	Tmem2	3110012M15Rik,MGC102198,mKIAA1412	Mus musculus transmembrane protein 2, mRNA (cDNA clone MGC:30634 IMAGE:3675225), complete cds.	83921	chr19	21886754	21930870	GO:0008150(biological_process)	GO:0005575(cellular_component);GO:0016021(integral to membrane)	GO:0003674(molecular_function)	Mm.329776	TC1720844	ENSMUST00000096194	36.2102	123.105	40.0793	39.4743	29.077	128.395	137.293	103.626
BC019852	0.00586544	0.26248	2.11967	down	BC019852	Serpinf1	AI195227,EPC-1,Pedf,Pedfl,Sdf3	Mus musculus serine (or cysteine) peptidase inhibitor, clade F, member 1, mRNA (cDNA clone MGC:29977 IMAGE:5123884), complete cds.	20317	chr11	75223530	75236035	GO:0016525(negative regulation of angiogenesis);GO:0050769(positive regulation of neurogenesis)	GO:0005576(extracellular region);GO:0005615(extracellular space)	GO:0004867(serine-type endopeptidase inhibitor activity)	Mm.2044	TC1572018///TC1628078	ENSMUST00000000769	744.158	1561.82	867.201	787.468	577.806	1663.86	1355.89	1665.71
BC021467	0.0199575	0.348572	2.09273	down	BC021467	Ldlrap1	AA691260,ARH2,Arh,Arh1,FHCB1,FHCB2	Mus musculus low density lipoprotein receptor adaptor protein 1, mRNA (cDNA clone MGC:29272 IMAGE:5067154), complete cds.	100017	chr4	134301336	134323858	GO:0006629(lipid metabolic process);GO:0006897(endocytosis);GO:0007242(intracellular signaling cascade);GO:0008202(steroid metabolic process);GO:0008203(cholesterol metabolic process);GO:0042632(cholesterol homeostasis);GO:0043393(regulation of protein binding);GO:0048260(positive regulation of receptor mediated endocytosis)	GO:0005769(early endosome);GO:0005829(cytosol);GO:0009925(basal plasma membrane);GO:0030121(AP-1 adaptor complex);GO:0030122(AP-2 adaptor complex)	GO:0001784(phosphotyrosine binding);GO:0004872(receptor activity);GO:0005102(receptor binding);GO:0005515(protein binding);GO:0008022(protein C-terminus binding);GO:0015460(transport accessory protein activity);GO:0030159(receptor signaling complex scaffold activity);GO:0030276(clathrin binding);GO:0030674(protein binding, bridging)	Mm.27486	NP495471	ENSMUST00000037828	170.273	346.947	234.534	144.614	131.67	295.837	392.617	352.387
BC021802	0.0395903	0.406087	3.11515	down	BC021802	Ankrd16	2810455F06Rik,AI646698,D430029B21Rik	Mus musculus cDNA clone IMAGE:3602055.	320816	chr2	11700203	11711947			GO:0003677(DNA binding)	Mm.260201	NP743519///TC1585386		49.7511	167.926	63.5073	49.1113	36.6346	77.9058	244.64	181.233
BC022174	0.00149499	0.198715	3.96322	down	BC022174	Cry1	AU020726,AU021000,Phll1	Mus musculus cryptochrome 1 (photolyase-like), mRNA (cDNA clone MGC:13933 IMAGE:4036758), complete cds.	12952	chr10	84594444	84647566	GO:0006281(DNA repair);GO:0006350(transcription);GO:0006355(regulation of transcription, DNA-dependent);GO:0007623(circadian rhythm);GO:0018298(protein-chromophore linkage);GO:0048511(rhythmic process);GO:0050896(response to stimulus)	GO:0005634(nucleus)	GO:0000166(nucleotide binding);GO:0003913(DNA photolyase activity);GO:0004872(receptor activity);GO:0005515(protein binding)	Mm.26237	TC1577572	ENSMUST00000020227	393.98	1515.09	275.305	505.374	401.26	1554.39	1471.99	1518.9
BC022176	0.0264147	0.365904	2.74379	down	BC022176	Ptx3	AI607804,TSG-14	Mus musculus pentraxin related gene, mRNA (cDNA clone MGC:13999 IMAGE:4012053), complete cds.	19288	chr3	66023831	66029727	GO:0001878(response to yeast);GO:0008228(opsonization);GO:0045429(positive regulation of nitric oxide biosynthetic process);GO:0050766(positive regulation of phagocytosis)	GO:0005615(extracellular space)	GO:0001872(zymosan binding)	Mm.442151///Mm.276776	TC1582385	ENSMUST00000029421	26.0444	73.6924	28.3748	18.5239	31.2344	93.5738	42.7709	84.7324
BC022952	0.000302367	0.150986	2.35671	down	BC022952	Maff	-	Mus musculus v-maf musculoaponeurotic fibrosarcoma oncogene family, protein F (avian), mRNA (cDNA clone MGC:30560 IMAGE:5132212), complete cds.	17133	chr15	79178107	79189506	GO:0000074(regulation of progression through cell cycle);GO:0001701(in utero embryonic development);GO:0006350(transcription);GO:0006355(regulation of transcription, DNA-dependent);GO:0045604(regulation of epidermal cell differentiation)	GO:0005622(intracellular);GO:0005634(nucleus)	GO:0003677(DNA binding);GO:0003700(transcription factor activity);GO:0046983(protein dimerization activity)	Mm.86646	TC1583975	ENSMUST00000096350	1033.52	2447.04	1067.33	998.423	1034.79	2181.02	2776.63	2383.48
BC023815	0.00200175	0.2208	3.35967	down	BC023815	Gadd45b	AI323528,Myd118	Mus musculus growth arrest and DNA-damage-inducible 45 beta, mRNA (cDNA clone MGC:36156 IMAGE:5355150), complete cds.	17873	chr10	80392834	80394949	GO:0000074(regulation of progression through cell cycle);GO:0000186(activation of MAPKK activity);GO:0006469(negative regulation of protein kinase activity);GO:0006915(apoptosis);GO:0007275(multicellular organismal development);GO:0030154(cell differentiation)	GO:0005634(nucleus)	GO:0005515(protein binding)	Mm.1360	TC1579606	ENSMUST00000015456	1599.07	5491.97	1460.35	1576.22	1760.65	5561.93	3991.79	6922.17
BC024448	0.00649657	0.264874	2.9966	down	BC024448	Golt1a	0610012C01Rik,Kiss1,metastatin	Mus musculus golgi transport 1 homolog A (S. cerevisiae), mRNA (cDNA clone MGC:37293 IMAGE:4974299), complete cds.	68338	chr1	135206376	135218520	GO:0006810(transport);GO:0015031(protein transport);GO:0016192(vesicle-mediated transport)	GO:0016020(membrane);GO:0016021(integral to membrane)		Mm.247935	TC1585362	ENSMUST00000007433	32.8742	96.8696	31.7889	43.2977	23.5359	120.516	85.1229	84.9699
BC024788	0.0268489	0.368843	2.77388	down	BC024788	Tmem38a	1110001E17Rik,AI413399,TRIC-A,mg33a	Mus musculus transmembrane protein 38A, mRNA (cDNA clone MGC:36643 IMAGE:5360106), complete cds.	74166	chr8	75096001	75111183		GO:0016020(membrane);GO:0016021(integral to membrane)		Mm.212927	TC1575849	ENSMUST00000034244	81.1388	234.458	86.4109	98.1097	58.8957	336.007	228.668	138.699
BC024871	0.0463166	0.422796	2.11585	down	BC024871	Ak3	AA407498,AI506714,AK-3,Ak3l,Ak3l1,Akl3l	Mus musculus adenylate kinase 3, mRNA (cDNA clone MGC:6970 IMAGE:3154594), complete cds.	56248	chr19	29095321	29122392	GO:0006139(nucleobase, nucleoside, nucleotide and nucleic acid metabolic process);GO:0008652(amino acid biosynthetic process)	GO:0005739(mitochondrion)	GO:0000166(nucleotide binding);GO:0004017(adenylate kinase activity);GO:0004765(shikimate kinase activity);GO:0005524(ATP binding);GO:0005525(GTP binding);GO:0016301(kinase activity);GO:0016740(transferase activity);GO:0016776(phosphotransferase activity, phosphate group as acceptor);GO:0019201(nucleotide kinase activity);GO:0046899(nucleoside triphosphate adenylate kinase activity)	Mm.394933///Mm.196067	TC1572497///TC1674400	ENSMUST00000025696	2290.94	4581.69	3494.53	1814.3	1564	4740.2	5178.38	3826.47
BC024988	0.0398687	0.407356	2.32535	down	BC024988	Galntl4	2900011G21Rik,BC024988,MGC32465	Mus musculus UDP-N-acetyl-alpha-D-galactosamine:polypeptide N-acetylgalactosaminyltransferase-like 4, mRNA (cDNA clone MGC:32465 IMAGE:5044626), complete cds.	233733	chr7	118615174	118923491		GO:0016020(membrane);GO:0016021(integral to membrane)	GO:0004653(polypeptide N-acetylgalactosaminyltransferase activity);GO:0005509(calcium ion binding);GO:0005529(sugar binding);GO:0016740(transferase activity);GO:0016757(transferase activity, transferring glycosyl groups);GO:0030145(manganese ion binding)	Mm.323322	TC1594474///TC1601543	ENSMUST00000049430	105.13	233.948	152.33	98.6733	64.3865	285.423	181.423	234.998
BC025034	0.00230665	0.227726	2.17809	down	BC025034	Immt	1700082C19Rik,D830041H16Rik,HMP,P87,P87/89,P89	Mus musculus cDNA clone IMAGE:4948845, containing frame-shift errors.	76614	chr6	71821126	71825260	GO:0008150(biological_process)	GO:0005739(mitochondrion);GO:0005743(mitochondrial inner membrane);GO:0016020(membrane);GO:0016021(integral to membrane)	GO:0003674(molecular_function)	Mm.235123	TC1591392///TC1588402	ENSMUST00000101301	87.6344	190.673	94.2735	73.6842	94.9455	213.101	194.478	164.441
BC025131	0.00101336	0.196803	2.23824	down	BC025131	Mfap5	MAGP-2	Mus musculus microfibrillar associated protein 5, mRNA (cDNA clone MGC:35969 IMAGE:3982519), complete cds.	50530	chr6	122463694	122478650	GO:0008150(biological_process)	GO:0001527(microfibril);GO:0005578(proteinaceous extracellular matrix);GO:0005615(extracellular space)	GO:0030023(extracellular matrix constituent conferring elasticity)	Mm.41931	TC1579014		277.878	626.813	269.594	275.408	288.632	658.131	702.742	519.567
BC025425	0.00284288	0.234804	2.02396	down	BC025425	Lpar1	5031439C20,AI326300,Edg2,Gpcr26,Kdt2,MGC29102,lpA1,vzg-1	Mus musculus endothelial differentiation, lysophosphatidic acid G-protein-coupled receptor, 2, mRNA (cDNA clone MGC:29102 IMAGE:5009055), complete cds.	14745	chr4	58448134	58566064	GO:0007165(signal transduction);GO:0007186(G-protein coupled receptor protein signaling pathway);GO:0043123(positive regulation of I-kappaB kinase/NF-kappaB cascade)	GO:0005887(integral to plasma membrane);GO:0016020(membrane);GO:0016021(integral to membrane)	GO:0001584(rhodopsin-like receptor activity);GO:0001619(lysosphingolipid and lysophosphatidic acid receptor activity);GO:0004871(signal transducer activity);GO:0004872(receptor activity);GO:0004930(G-protein coupled receptor activity)	Mm.4772	TC1613080///TC1592407	ENSMUST00000055018	921.476	1847.75	1062.74	749.69	951.994	1964.14	1818.67	1760.45
BC025942	0.000185169	0.147766	2.78534	down	BC025942	Mtrr	4732420G08	Mus musculus 5-methyltetrahydrofolate-homocysteine methyltransferase reductase, mRNA (cDNA clone MGC:37944 IMAGE:5132457), complete cds.	210009	chr13	68700231	68719593	GO:0006118(electron transport);GO:0050821(protein stabilization)		GO:0005506(iron ion binding);GO:0008168(methyltransferase activity);GO:0009055(electron carrier activity);GO:0010181(FMN binding);GO:0016740(transferase activity);GO:0030586([methionine synthase] reductase activity);GO:0047138(aquacobalamin reductase activity);GO:0050660(FAD binding)	Mm.205514	TC1579872///TC1693980	ENSMUST00000045827	211.308	589.44	231.215	198.662	204.046	603.144	642.699	522.476
BC026375	0.04368	0.41712	2.39532	down	BC026375	Gpnmb	DC-HIL,Dchil,ipd	Mus musculus glycoprotein (transmembrane) nmb, mRNA (cDNA clone MGC:31121 IMAGE:4164706), complete cds.	93695	chr6	48986642	49006781	GO:0007155(cell adhesion);GO:0008152(metabolic process)	GO:0005887(integral to plasma membrane);GO:0016020(membrane);GO:0016021(integral to membrane);GO:0016023(cytoplasmic membrane-bound vesicle)	GO:0005178(integrin binding);GO:0008201(heparin binding)	Mm.302602	TC1573833	ENSMUST00000031840	122.035	275.489	79.3611	95.0572	191.687	311.847	307.105	207.514
BC026425	0.0105142	0.295789	2.19482	down	BC026425	Mospd2	2410013I23Rik	Mus musculus motile sperm domain containing 2, mRNA (cDNA clone MGC:31317 IMAGE:4223175), complete cds.	76763	chrX	161374105	161418233	GO:0006928(cell motility)	GO:0016020(membrane);GO:0016021(integral to membrane)	GO:0005198(structural molecule activity)	Mm.291758	TC1588072///TC1588889	ENSMUST00000004715	123.844	267.451	153.999	126.398	91.1357	230.505	305.475	266.372
BC026738	0.0165603	0.336067	2.09007	down	BC026738	3110043O21Rik	AI840585	Mus musculus RIKEN cDNA 3110043O21 gene, mRNA (cDNA clone MGC:25598 IMAGE:4020832), complete cds.	73205	chr4	35138535	35164522				Mm.331544	TC1591228///TC1578391	ENSMUST00000084724	145.302	301.888	183.666	112.093	140.147	251.906	374.564	279.194
BC027132	0.0332612	0.391341	2.07152	down	BC027132	N/A	N/A	Mus musculus, clone IMAGE:5360728, mRNA.	N/A	chr8	42426281	42435391							312.313	619.316	457.667	240.268	239.006	684.149	641.379	532.419
BC027209	0.0409204	0.410204	2.31188	down	BC027209	Nudt4	4933436C10Rik,DIPP2,DIPP2alpha,DIPP2beta,HDCMB47P	Mus musculus nudix (nucleoside diphosphate linked moiety X)-type motif 4, mRNA (cDNA clone MGC:25580 IMAGE:3994391), complete cds.	71207	chr10	95009918	95026462			GO:0000287(magnesium ion binding);GO:0008486(diphosphoinositol-polyphosphate diphosphatase activity);GO:0016787(hydrolase activity);GO:0030145(manganese ion binding);GO:0046872(metal ion binding)	Mm.24397	TC1661010///TC1572794	ENSMUST00000020217	1205.94	2599.79	1897.89	932.075	787.867	2586.88	2973.99	2238.49
BC027211	0.0145335	0.323955	2.21877	down	BC027211	Fbxo32	4833442G10Rik,AI430017,ATROGIN1,MAFbx,atrogin-1	Mus musculus F-box protein 32, mRNA (cDNA clone MGC:25730 IMAGE:3981597), complete cds.	67731	chr15	58012362	58046381	GO:0006512(ubiquitin cycle);GO:0008150(biological_process)	GO:0005634(nucleus)	GO:0005515(protein binding)	Mm.292042	TC1579220	ENSMUST00000022986	188.41	407.941	257.771	148.717	158.743	424.106	456.046	343.671
BC027264	0.0107109	0.296619	2.06415	down	BC027264	Armcx6	AW060994,MGC27863	Mus musculus armadillo repeat containing, X-linked 6, mRNA (cDNA clone MGC:27863 IMAGE:3492516), complete cds.	278097	chrX	131282993	131285951		GO:0016020(membrane);GO:0016021(integral to membrane)		Mm.113272	TC1582163	ENSMUST00000052431	49.8576	103.178	41.3848	48.36	59.8279	105.824	81.2801	122.43
BC027373	0.0481202	0.427325	2.62869	down	BC027373	Klhl25	2810402K13Rik,BC027373,Enc-1,MGC36331	Mus musculus kelch-like 25 (Drosophila), mRNA (cDNA clone MGC:36331 IMAGE:4948451), complete cds.	207952	chr7	82993282	83012377			GO:0005515(protein binding)	Mm.206223	TC1578827///TC1582684	ENSMUST00000092073///ENSMUST00000069361	403.778	983.403	555.527	459.725	196.081	1148.82	761.149	1040.24
BC027745	0.034312	0.392226	2.51948	down	BC027745	Pdxk	2310036D04Rik,AA119688,C77999	Mus musculus pyridoxal (pyridoxine, vitamin B6) kinase, mRNA (cDNA clone MGC:29261 IMAGE:5064695), complete cds.	216134	chr10	77901714	77927720	GO:0008614(pyridoxine metabolic process);GO:0008615(pyridoxine biosynthetic process)		GO:0000166(nucleotide binding);GO:0005524(ATP binding);GO:0008270(zinc ion binding);GO:0008478(pyridoxal kinase activity);GO:0016301(kinase activity);GO:0016740(transferase activity);GO:0046872(metal ion binding)	Mm.206159	TC1576473///TC1615702	ENSMUST00000041616	287.583	732.348	299.474	369.939	193.336	812.566	932.269	452.209
BC027756	0.0480582	0.427325	2.78268	down	BC027756	Cdc73	8430414L16Rik,BC027756,C130030P16Rik,C81219,Hrpt2,MGC29274,MGC36559	Mus musculus Vcell division cycle 73, Paf1/RNA polymerase II complex component, homolog (S. cerevisiae), mRNA (cDNA clone MGC:29274 IMAGE:5067496), complete cds.	214498	chr1	145454883	145549904	GO:0006350(transcription);GO:0007049(cell cycle);GO:0045786(negative regulation of progression through cell cycle)	GO:0005634(nucleus)		Mm.389191	TC1598636///TC1724144	ENSMUST00000097551///ENSMUST00000018337	458.533	1128.67	802.082	319.891	253.626	935.891	1174.79	1275.33
BC028286	0.0379833	0.402746	2.36373	down	BC028286	Prom1	4932416E19Rik,AC133,CD133,Prom,Prom-1,Proml1	Mus musculus prominin 1, mRNA (cDNA clone MGC:25280 IMAGE:4502359), complete cds.	19126	chr5	44384860	44493271		GO:0005615(extracellular space);GO:0005887(integral to plasma membrane);GO:0005902(microvillus);GO:0005903(brush border);GO:0016020(membrane);GO:0016021(integral to membrane)		Mm.6250	TC1589026///NP674589	ENSMUST00000087441///ENSMUST00000030973	45.9208	110.911	57.8343	32.8343	47.0937	141.278	67.3751	124.079
BC028432	0.0334803	0.391435	3.27838	down	BC028432	Rbp7	1110002J23Rik,CRBP-III	Mus musculus retinol binding protein 7, cellular, mRNA (cDNA clone MGC:41075 IMAGE:1348253), complete cds.	63954	chr4	148823795	148829074	GO:0006810(transport)		GO:0005488(binding);GO:0005501(retinoid binding);GO:0008289(lipid binding);GO:0016918(retinal binding);GO:0019841(retinol binding)	Mm.46023	TC1585354	ENSMUST00000030848	181.149	682.515	167.865	190.165	185.417	525.855	333.897	1187.79
BC028490	0.0286599	0.37554	2.7608	down	BC028490	Nmb	3110023K12Rik	Mus musculus neuromedin B, mRNA (cDNA clone MGC:41013 IMAGE:1366735), complete cds.	68039	chr7	88047119	88049883	GO:0007218(neuropeptide signaling pathway)	GO:0005615(extracellular space)		Mm.22246	TC1586714	ENSMUST00000026817	40.5828	113.954	53.0809	41.6183	27.0492	75.2973	100.652	165.912
BC028515	0.0368441	0.400039	4.08345	down	BC028515	Tnni2	-	Mus musculus troponin I, skeletal, fast 2, mRNA (cDNA clone MGC:41207 IMAGE:1448494), complete cds.	21953	chr7	149627734	149630310	GO:0006818(hydrogen transport);GO:0006937(regulation of muscle contraction)	GO:0005861(troponin complex)	GO:0003779(actin binding);GO:0005200(structural constituent of cytoskeleton);GO:0005524(ATP binding);GO:0008553(hydrogen-exporting ATPase activity, phosphorylative mechanism)	Mm.39469	TC1574730	ENSMUST00000033422	32.7818	146.42	47.0794	21.8957	29.3703	225.986	59.211	154.063
BC028647	0.0405157	0.409732	2.0474	down	BC028647	Taf6l	2810417N14Rik,BB223262,C530024J06Rik,MGC41377,PAF65A	Mus musculus TAF6-like RNA polymerase II, p300/CBP-associated factor (PCAF)-associated factor, mRNA (cDNA clone MGC:41377 IMAGE:1244243), complete cds.	225895	chr19	8848981	8860753	GO:0006350(transcription);GO:0006352(transcription initiation);GO:0006355(regulation of transcription, DNA-dependent);GO:0051090(regulation of transcription factor activity)	GO:0005634(nucleus)	GO:0003702(RNA polymerase II transcription factor activity);GO:0016986(transcription initiation factor activity)	Mm.220886	TC1620944	ENSMUST00000003777	320.62	636.745	423.578	332.294	205.989	721.447	686.039	502.75
BC028902	0.00458032	0.253022	2.29757	down	BC028902	Plek2	-	Mus musculus pleckstrin 2, mRNA (cDNA clone MGC:18708 IMAGE:4208341), complete cds.	27260	chr12	79989683	80007925	GO:0006412(translation);GO:0007242(intracellular signaling cascade)	GO:0005622(intracellular);GO:0005840(ribosome);GO:0005856(cytoskeleton);GO:0016020(membrane)	GO:0003735(structural constituent of ribosome)	Mm.103380	TC1584871	ENSMUST00000021544	55.858	130.849	56.464	52.4392	58.6709	168.045	120.124	104.377
BC028921	0.0257183	0.363012	2.26888	down	BC028921	Fstl1	AI316791,AW107808,Fstl,TSC-36	Mus musculus follistatin-like 1, mRNA (cDNA clone MGC:25371 IMAGE:2647002), complete cds.	14314	chr16	37777156	37835834		GO:0005615(extracellular space)	GO:0005509(calcium ion binding);GO:0008201(heparin binding)	Mm.182434	TC1573093		185.223	429.765	235.216	169.2	151.251	339.211	339.405	610.678
BC028937	0.00349613	0.251628	2.27759	down	BC028937	Slc27a1	FATP1,Fatp	Mus musculus solute carrier family 27 (fatty acid transporter), member 1, mRNA (cDNA clone MGC:36042 IMAGE:5362790), complete cds.	26457	chr8	74092825	74110601	GO:0001676(long-chain fatty acid metabolic process);GO:0006629(lipid metabolic process);GO:0006631(fatty acid metabolic process);GO:0006810(transport);GO:0006869(lipid transport);GO:0008152(metabolic process)	GO:0005886(plasma membrane);GO:0016020(membrane);GO:0016021(integral to membrane);GO:0031410(cytoplasmic vesicle)	GO:0000166(nucleotide binding);GO:0003824(catalytic activity);GO:0004467(long-chain-fatty-acid-CoA ligase activity);GO:0005215(transporter activity);GO:0016874(ligase activity)	Mm.38165	TC1582895	ENSMUST00000034267	166.209	375.034	142.844	206.299	149.484	345.141	425.912	354.048
BC029182	0.0116571	0.302867	3.01225	down	BC029182	Ccdc44	2310066I18Rik	Mus musculus coiled-coil domain containing 44, mRNA (cDNA clone MGC:36842 IMAGE:4195338), complete cds.	70207	chr11	105927420	105934926	GO:0015074(DNA integration)	GO:0005739(mitochondrion)	GO:0003677(DNA binding);GO:0008270(zinc ion binding);GO:0008907(integrase activity)	Mm.343857	TC1582774	ENSMUST00000002048	87.518	256.631	116.241	90.354	55.9595	243.594	320.616	205.683
BC030069	0.0187084	0.345236	2.01689	down	BC030069	Bok	AI847676,AU021146,matador,mtd	Mus musculus Bcl-2-related ovarian killer protein, mRNA (cDNA clone MGC:41110 IMAGE:2936938), complete cds.	51800	chr1	95582332	95592341	GO:0006915(apoptosis);GO:0006917(induction of apoptosis);GO:0042981(regulation of apoptosis)	GO:0005575(cellular_component)		Mm.3295	TC1734121		92.9514	191.132	95.7769	104.21	78.8673	196.142	240.142	137.112
BC030403	0.011677	0.302867	2.43468	down	BC030403	Krt7	D15Wsu77e,K7,Krt2-7,MGC11625	Mus musculus keratin 7, mRNA (cDNA clone MGC:40614 IMAGE:5355662), complete cds.	110310	chr15	101242832	101258224	GO:0007010(cytoskeleton organization and biogenesis)	GO:0005882(intermediate filament)	GO:0005198(structural molecule activity);GO:0005200(structural constituent of cytoskeleton);GO:0005515(protein binding)	Mm.289377	TC1576676	ENSMUST00000068904	75.8913	182.251	77.8908	54.0432	95.74	156.933	164.455	225.364
BC030879	0.0361747	0.396848	2.14151	down	BC030879	Slc9a8	1200006P13Rik,6430709P13Rik,AI182282,NHE8	Mus musculus solute carrier family 9 (sodium/hydrogen exchanger), member 8, mRNA (cDNA clone MGC:31394 IMAGE:4241988), complete cds.	77031	chr2	167247216	167300140	GO:0006810(transport);GO:0006811(ion transport);GO:0006814(sodium ion transport);GO:0006885(regulation of pH)	GO:0016020(membrane);GO:0016021(integral to membrane)	GO:0015297(antiporter activity);GO:0015299(solute:hydrogen antiporter activity);GO:0015385(sodium:hydrogen antiporter activity);GO:0031402(sodium ion binding)	Mm.443194///Mm.278924	TC1643849///TC1632510///TC1592783///TC1603066	ENSMUST00000047815	80.4779	166.978	110.986	52.742	77.7055	131.413	196.708	172.813
BC031377	0.0004268	0.167351	5.04034	down	BC031377	Nfil3	AV225605,E4BP4	Mus musculus nuclear factor, interleukin 3, regulated, mRNA (cDNA clone MGC:31040 IMAGE:5253195), complete cds.	18030	chr13	53062577	53076252	GO:0006355(regulation of transcription, DNA-dependent)	GO:0005575(cellular_component);GO:0005634(nucleus)	GO:0003674(molecular_function);GO:0003677(DNA binding);GO:0003700(transcription factor activity);GO:0046983(protein dimerization activity)	Mm.136604	TC1582388	ENSMUST00000071065	1347.95	6750.66	1637.11	1330.67	1076.09	7963.46	6384.91	5903.63
BC031382	0.00122423	0.1969	3.11118	down	BC031382	Dpy19l1	1100001I19Rik,6030402K12,AI225861,AW558481	Mus musculus dpy-19-like 1 (C. elegans), mRNA (cDNA clone IMAGE:5012181).	244745	chr9	24217235	24258341	GO:0008150(biological_process)	GO:0005575(cellular_component)	GO:0003674(molecular_function)	Mm.38526	TC1749376///TC1596856	ENSMUST00000034446///ENSMUST00000086251	126.487	388.448	97.0275	148.492	133.942	415.898	400.861	348.584
BC031429	0.0127518	0.312505	2.21399	down	BC031429	Prss12	Bssp-3,motopsin	Mus musculus protease, serine, 12 neurotrypsin (motopsin), mRNA (cDNA clone MGC:18371 IMAGE:3665834), complete cds.	19142	chr3	123149928	123209514	GO:0006508(proteolysis)	GO:0005615(extracellular space);GO:0016020(membrane)	GO:0004252(serine-type endopeptidase activity);GO:0005044(scavenger receptor activity);GO:0008233(peptidase activity);GO:0016787(hydrolase activity)	Mm.9431	TC1583499	ENSMUST00000029603	116.399	250.582	139.318	79.0214	130.858	271.905	247.831	232.01
BC031665	0.00536717	0.256741	2.40658	down	BC031665	Cxcr4	CD184,Cmkar4,LESTR,PB-CKR,PBSF/SDF-1,Sdf1r	Mus musculus chemokine (C-X-C motif) receptor 4, mRNA (cDNA clone MGC:36266 IMAGE:3592479), complete cds.	12767	chr1	130484775	130488864	GO:0001569(patterning of blood vessels);GO:0001667(ameboidal cell migration);GO:0001764(neuron migration);GO:0006935(chemotaxis);GO:0006952(defense response);GO:0007165(signal transduction);GO:0007186(G-protein coupled receptor protein signaling pathway);GO:0007281(germ cell development);GO:0007399(nervous system development);GO:0007420(brain development);GO:0008045(motor axon guidance);GO:000835…	GO:0016020(membrane);GO:0016021(integral to membrane);GO:0030426(growth cone);GO:0031252(leading edge)	GO:0001584(rhodopsin-like receptor activity);GO:0003779(actin binding);GO:0004871(signal transducer activity);GO:0004872(receptor activity);GO:0004930(G-protein coupled receptor activity);GO:0004950(chemokine receptor activity);GO:0005515(protein binding);GO:0016493(C-C chemokine receptor activity);GO:0016494(C-X-C chemokine receptor activity);GO:0045028(purinergic nucleotide receptor activity, G…	Mm.1401	TC1598687	ENSMUST00000052172	674.181	1595.78	736.518	792.497	493.527	1801.27	1481.59	1504.47
BC031848	0.014948	0.328665	2.5578	down	BC031848	Nsmce1	2510027N19Rik	Mus musculus non-SMC element 1 homolog (S. cerevisiae), mRNA (cDNA clone MGC:25737 IMAGE:3984224), complete cds.	67711	chr7	132611181	132635035	GO:0006118(electron transport);GO:0006281(DNA repair);GO:0006310(DNA recombination);GO:0006974(response to DNA damage stimulus);GO:0007242(intracellular signaling cascade)	GO:0005634(nucleus)	GO:0008270(zinc ion binding);GO:0009055(electron carrier activity);GO:0020037(heme binding);GO:0046872(metal ion binding)	Mm.4467	TC1601972	ENSMUST00000033006	149.08	371.657	99.8637	198.328	149.049	379.164	439.098	296.709
BC031907	0.00859875	0.280696	2.19974	down	BC031907	Ccrk	4932702G04Rik,AU019450,AW558027,CDCH,MGC38901,PNQLARE,p42	Mus musculus cell cycle related kinase, mRNA (cDNA clone MGC:38901 IMAGE:5362198), complete cds.	105278	chr13	64533860	64541029	GO:0006468(protein amino acid phosphorylation);GO:0007049(cell cycle);GO:0051301(cell division)	GO:0005634(nucleus)	GO:0000166(nucleotide binding);GO:0004672(protein kinase activity);GO:0004674(protein serine/threonine kinase activity);GO:0005524(ATP binding);GO:0016301(kinase activity);GO:0016740(transferase activity)	Mm.74982	TC1772795///TC1642450	ENSMUST00000021939	97.05	209.517	70.1108	106.373	114.666	187.386	211.652	229.512
BC031930	0.042398	0.413902	2.42415	down	BC031930	Det1	2610034H20Rik	Mus musculus de-etiolated homolog 1 (Arabidopsis), mRNA (cDNA clone MGC:19287 IMAGE:4018106), complete cds.	76375	chr7	85972359	85992097	GO:0006512(ubiquitin cycle)	GO:0005634(nucleus)		Mm.250541	TC1579934	ENSMUST00000032839	114.889	270.888	170.407	98.9803	75.2795	339.919	287.938	184.808
BC033408	0.00113893	0.1969	2.10731	down	BC033408	Prei4	2310004G06Rik,2310032D16Rik,AU015213,mKIAA1434	Mus musculus preimplantation protein 4, mRNA (cDNA clone MGC:38711 IMAGE:5357683), complete cds.	74182	chr2	132354818	132403984	GO:0005975(carbohydrate metabolic process);GO:0006071(glycerol metabolic process)		GO:0003824(catalytic activity);GO:0008889(glycerophosphodiester phosphodiesterase activity);GO:0016787(hydrolase activity);GO:0030246(carbohydrate binding)	Mm.211211	TC1586411///TC1625029	ENSMUST00000028822	1070.06	2266.37	1138.83	1077.63	993.721	2060.56	2095.4	2643.14
BC034054	0.0175956	0.342718	2.81819	down	BC034054	Samd14	AI839049,AI854782,BC034054,MGC31049	Mus musculus sterile alpha motif domain containing 14, mRNA (cDNA clone MGC:31049 IMAGE:4505400), complete cds.	217125	chr11	94871672	94887398				Mm.297199	TC1574595	ENSMUST00000055947	99.816	264.305	152.33	82.7071	64.4104	248.292	240.683	303.94
BC034108	0.00767184	0.276517	2.02954	down	BC034108	Gng7	AI840417	Mus musculus guanine nucleotide binding protein (G protein), gamma 7 subunit, mRNA (cDNA clone MGC:31559 IMAGE:4503666), complete cds.	14708	chr10	80411373	80460786	GO:0001662(behavioral fear response);GO:0007165(signal transduction);GO:0007168(receptor guanylyl cyclase signaling pathway);GO:0007186(G-protein coupled receptor protein signaling pathway);GO:0007626(locomotory behavior)	GO:0005834(heterotrimeric G-protein complex);GO:0016020(membrane)	GO:0004871(signal transducer activity);GO:0005083(small GTPase regulator activity)	Mm.222496	TC1585194///TC1626539	ENSMUST00000092285	1737.39	3544.83	1590.72	2048.34	1573.11	2894.26	3454.54	4285.71
BC034166	0.0217392	0.352113	5.13015	down	BC034166	Rasd1	Dexras1	Mus musculus RAS, dexamethasone-induced 1, mRNA (cDNA clone MGC:36188 IMAGE:4989312), complete cds.	19416	chr11	59776685	59778418	GO:0006886(intracellular protein transport);GO:0007264(small GTPase mediated signal transduction);GO:0015031(protein transport)	GO:0005622(intracellular);GO:0016020(membrane)	GO:0000166(nucleotide binding);GO:0005525(GTP binding)	Mm.3903	TC1580646	ENSMUST00000062405	318.561	1417.15	402.075	438.816	114.791	1257.38	1239.56	1754.5
BC034839	0.0337226	0.391435	2.90528	down	BC034839	Nrg4	AI552600	Mus musculus neuregulin 4, mRNA (cDNA clone MGC:40998 IMAGE:3372942), complete cds.	83961	chr9	55069104	55131394		GO:0016020(membrane);GO:0016021(integral to membrane)	GO:0008083(growth factor activity)	Mm.441133	TC1595873		122.907	365.72	124.237	163.569	80.9153	415	479.55	202.611
BC037070	0.00543502	0.257606	2.05231	down	BC037070	E130308A19Rik	MGC47072	Mus musculus RIKEN cDNA E130308A19 gene, mRNA (cDNA clone MGC:47072 IMAGE:5004205), complete cds.	230259	chr4	59639269	59733841				Mm.45688	TC1580421///TC1585957	ENSMUST00000070150///ENSMUST00000052420	433.305	883.716	529.837	374.001	396.076	864.008	778.596	1008.54
BC038403	0.0438747	0.41712	2.49726	down	BC038403	Daam1	1700066F09Rik,2310028E21Rik,AI503486,E130308H01,mKIAA0666	Mus musculus dishevelled associated activator of morphogenesis 1, mRNA (cDNA clone IMAGE:4951186), **** WARNING: chimeric clone ****.	208846	chr12	72932064	73093354	GO:0016043(cellular component organization and biogenesis);GO:0030036(actin cytoskeleton organization and biogenesis)		GO:0003779(actin binding);GO:0017048(Rho GTPase binding)	Mm.87417	TC1576712	ENSMUST00000085299	182.305	412.553	301.046	138.927	106.944	415.764	447.521	374.375
BC040396	0.0202078	0.349552	2.04727	down	BC040396	Rgs12	1200016K18Rik,4632412M04Rik,AI481290,E130309H11	Mus musculus regulator of G-protein signaling 12, mRNA (cDNA clone MGC:27545 IMAGE:4461061), complete cds.	71729	chr5	35292099	35376242	GO:0007165(signal transduction)		GO:0004871(signal transducer activity);GO:0005057(receptor signaling protein activity);GO:0005096(GTPase activator activity);GO:0005515(protein binding)	Mm.196208	TC1575711	ENSMUST00000030984	85.6793	173.746	71.3241	72.5296	113.184	146.643	158.673	215.922
BC040749	0.000942957	0.194879	3.39827	down	BC040749	Acot1	ACH2,CTE-1,CTE-I,Cte1,D12Ucla1	Mus musculus acyl-CoA thioesterase 1, mRNA (cDNA clone IMAGE:4024543), with apparent retained intron.	26897	chr12	85353813	85358619	GO:0001676(long-chain fatty acid metabolic process);GO:0006629(lipid metabolic process);GO:0006637(acyl-CoA metabolic process)	GO:0005737(cytoplasm)	GO:0004759(serine esterase activity);GO:0016290(palmitoyl-CoA hydrolase activity);GO:0016291(acyl-CoA thioesterase activity);GO:0016292(acyl-CoA thioesterase I activity);GO:0016787(hydrolase activity)	Mm.1978	TC1608287	ENSMUST00000085210	46.1011	155.054	35.4844	51.4	51.4188	171.183	157.281	136.697
BC042430	0.0137414	0.321019	2.77338	down	BC042430	Lmnb2	-	Mus musculus lamin B2, mRNA (cDNA clone MGC:30628 IMAGE:3674002), complete cds.	16907	chr10	80364107	80380972		GO:0005634(nucleus);GO:0005638(lamin filament);GO:0005882(intermediate filament)	GO:0005198(structural molecule activity)	Mm.7362	TC1595730///TC1576846	ENSMUST00000057623	157.758	448.014	177.399	117.882	177.995	396.649	629.276	318.117
BC042511	0.00321646	0.24389	2.16454	down	BC042511	Mast4	4930420O11Rik,AI642422,mKIAA0303	Mus musculus microtubule associated serine/threonine kinase family member 4, mRNA (cDNA clone IMAGE:4018414), partial cds.	328329	chr13	103524477	103577529	GO:0006468(protein amino acid phosphorylation);GO:0006605(protein targeting);GO:0007242(intracellular signaling cascade)		GO:0000166(nucleotide binding);GO:0004672(protein kinase activity);GO:0004674(protein serine/threonine kinase activity);GO:0005515(protein binding);GO:0005524(ATP binding);GO:0016301(kinase activity);GO:0016740(transferase activity)	Mm.202606	TC1597032///TC1717352///TC1586904///TC1605684///TC1752743	ENSMUST00000046416///ENSMUST00000099202	270.706	586.224	312.334	267.624	232.161	546.312	521.232	691.128
BC042643	0.0174392	0.341468	2.16323	down	BC042643	Dnajc27	AI639580,C330021A05Rik,Rabj,Rbj	Mus musculus rab and DnaJ domain containing, mRNA (cDNA clone MGC:38706 IMAGE:5357595), complete cds.	217378	chr12	4082658	4110605	GO:0007264(small GTPase mediated signal transduction)		GO:0005525(GTP binding);GO:0031072(heat shock protein binding)	Mm.271656	TC1642667///TC1662044	ENSMUST00000020986	129.117	274.245	166.618	92.5523	128.18	268.739	229.349	324.646
BC043069	0.0275561	0.372583	2.23849	down	BC043069	Hnrnpab	3010025C11Rik,CBF-A,Cgbfa,Hnrpab	Mus musculus heterogeneous nuclear ribonucleoprotein A/B, mRNA (cDNA clone MGC:57973 IMAGE:6402930), complete cds.	15384	chr11	51414370	51420337	GO:0001837(epithelial to mesenchymal transition);GO:0006350(transcription);GO:0006355(regulation of transcription, DNA-dependent);GO:0006396(RNA processing);GO:0043193(positive regulation of gene-specific transcription)	GO:0005634(nucleus);GO:0005737(cytoplasm);GO:0030529(ribonucleoprotein complex)	GO:0000166(nucleotide binding);GO:0003676(nucleic acid binding);GO:0003677(DNA binding);GO:0003700(transcription factor activity);GO:0003723(RNA binding);GO:0005515(protein binding)	Mm.280842///Mm.439845	TC1613828///TC1587030///TC1573878	ENSMUST00000074669	193.098	446.018	217.267	154.88	207.147	494.105	562.772	281.177
BC043096	0.00296076	0.238501	2.13098	down	BC043096	Kdm5c	Jarid1c,Smcx,mKIAA0234	Mus musculus jumonji, AT rich interactive domain 1C (Rbp2 like), mRNA (cDNA clone MGC:58015 IMAGE:6405943), complete cds.	20591	chrX	148667814	148708313	GO:0008150(biological_process)	GO:0005575(cellular_component);GO:0005622(intracellular);GO:0005634(nucleus)	GO:0003674(molecular_function);GO:0003677(DNA binding);GO:0005515(protein binding);GO:0008270(zinc ion binding);GO:0046872(metal ion binding)	Mm.142655	TC1576232///TC1608719	ENSMUST00000082177	148.033	312.428	118.581	154.874	170.643	286.8	331.676	318.808
BC043115	0.0115561	0.302789	2.26295	down	BC043115	Ccdc88c	0610010D24Rik,AV000935,AW324073,Daple,mKIAA1509	Mus musculus coiled-coil domain containing 88C, mRNA (cDNA clone MGC:58041 IMAGE:6408630), complete cds.	68339	chr12	102149732	102267269	GO:0001932(regulation of protein amino acid phosphorylation);GO:0016055(Wnt receptor signaling pathway);GO:0045810(negative regulation of frizzled signaling pathway);GO:0051260(protein homooligomerization)	GO:0005626(insoluble fraction)	GO:0030165(PDZ domain binding)	Mm.156217	NP323817///TC1589075	ENSMUST00000085096///ENSMUST00000068411	45.8105	107.121	48.9656	43.5134	44.9526	79.7837	146.836	94.7433
BC043447	0.00996716	0.292303	2.50587	down	BC043447	Dgat2	0610010B06Rik,DGAT-2	Mus musculus diacylglycerol O-acyltransferase 2, mRNA (cDNA clone MGC:49088 IMAGE:5125951), complete cds.	67800	chr7	106302172	106331223	GO:0006071(glycerol metabolic process);GO:0006629(lipid metabolic process);GO:0008610(lipid biosynthetic process);GO:0019432(triacylglycerol biosynthetic process)	GO:0005624(membrane fraction);GO:0005783(endoplasmic reticulum);GO:0016020(membrane);GO:0016021(integral to membrane)	GO:0003846(2-acylglycerol O-acyltransferase activity);GO:0004144(diacylglycerol O-acyltransferase activity);GO:0008415(acyltransferase activity);GO:0016740(transferase activity)	Mm.180189	TC1757989///TC1574195	ENSMUST00000033001	658.403	1613.98	883.742	486.206	605.26	1704.96	1813.3	1323.66
BC044749	0.0352534	0.394433	2.3941	down	BC044749	2310057M21Rik	3110040E10Rik,AI429544	Mus musculus RIKEN cDNA 2310057M21 gene, mRNA (cDNA clone MGC:51643 IMAGE:5102741), complete cds.	68277	chr7	138486699	138506220			GO:0005524(ATP binding);GO:0016887(ATPase activity);GO:0042802(identical protein binding)	Mm.121122	TC1580608///TC1611825	ENSMUST00000059438	188.365	421.816	233.757	230.113	101.224	394.474	419.972	451.002
BC044762	0.0105953	0.295789	3.27664	down	BC044762	Arrdc3	AI450344,MGC107410,mKIAA1376	Mus musculus arrestin domain containing 3, mRNA (cDNA clone IMAGE:5359049).	105171	chr13	81022682	81035303	GO:0008150(biological_process)	GO:0005575(cellular_component)	GO:0003674(molecular_function)	Mm.423137	TC1597341	ENSMUST00000099356	118.54	365.13	183.092	88.8656	83.6615	417.877	326.075	351.439
BC046236	0.0238046	0.355999	3.15751	down	BC046236	Wdr37	3110035P10Rik,4933417A01Rik,6430603N07,AI481191,mKIAA0982	Mus musculus WD repeat domain 37, mRNA (cDNA clone MGC:58091 IMAGE:6817089), complete cds.	207615	chr13	8804131	8860513				Mm.284654	TC1580135///TC1615024///TC1601481	ENSMUST00000066405///ENSMUST00000054251	47.382	142.142	50.042	25.5154	66.5885	177.932	144.115	104.377
BC046288	0.0140392	0.323467	2.23026	down	BC046288	Rrh	-	Mus musculus retinal pigment epithelium derived rhodopsin homolog, mRNA (cDNA clone MGC:54766 IMAGE:6468540), complete cds.	20132	chr3	129511492	129525409	GO:0007165(signal transduction);GO:0007186(G-protein coupled receptor protein signaling pathway);GO:0007601(visual perception);GO:0018298(protein-chromophore linkage)	GO:0016020(membrane);GO:0016021(integral to membrane)	GO:0001584(rhodopsin-like receptor activity);GO:0004871(signal transducer activity);GO:0004872(receptor activity);GO:0004930(G-protein coupled receptor activity)	Mm.278758	TC1596930	ENSMUST00000090295	71.5289	156.028	86.7248	78.5802	49.2817	131.76	166.793	169.53
BC046304	0.0257498	0.363012	2.15859	down	BC046304	Dkk3	AW061014,C87148	Mus musculus dickkopf homolog 3 (Xenopus laevis), mRNA (cDNA clone MGC:54590 IMAGE:6493718), complete cds.	50781	chr7	119259535	119301933	GO:0007275(multicellular organismal development);GO:0016055(Wnt receptor signaling pathway);GO:0030178(negative regulation of Wnt receptor signaling pathway)	GO:0005576(extracellular region);GO:0005615(extracellular space)		Mm.55143	TC1572024	ENSMUST00000033036	40.7111	89.4336	50.2297	38.7139	33.1896	59.6588	105.741	102.901
BC046420	0.0094776	0.289576	2.68257	down	BC046420	Dpt	1810032B19Rik,5033416F05Rik,EQ-1,Eq1	Mus musculus dermatopontin, mRNA (cDNA clone MGC:51504 IMAGE:4165966), complete cds.	56429	chr1	166726848	166754404	GO:0007155(cell adhesion)	GO:0005578(proteinaceous extracellular matrix);GO:0005615(extracellular space)	GO:0005515(protein binding)	Mm.28935	TC1580976	ENSMUST00000027861	323.183	832.345	425.023	335.72	208.807	817.659	880.391	798.986
BC046464	0.00919468	0.286686	2.15092	down	BC046464	Wnk2	1810073P09Rik,AW122246,ESTM15,X83337,mKIAA1760	Mus musculus WNK lysine deficient protein kinase 2, mRNA (cDNA clone IMAGE:4193361), partial cds.	75607	chr13	49131670	49186405	GO:0006468(protein amino acid phosphorylation)		GO:0000166(nucleotide binding);GO:0004672(protein kinase activity);GO:0004674(protein serine/threonine kinase activity);GO:0005524(ATP binding);GO:0016301(kinase activity);GO:0016740(transferase activity)	Mm.342723	NP865090	ENSMUST00000035538	214.65	450.258	285.802	187.991	170.156	421.683	472.116	456.975
BC046622	0.046853	0.423982	3.07889	down	BC046622	Dbndd1	2810427I04Rik,D8Ertd590e	Mus musculus dysbindin (dystrobrevin binding protein 1) domain containing 1, mRNA (cDNA clone MGC:54448 IMAGE:6389902), complete cds.	72185	chr8	126029586	126039290		GO:0005737(cytoplasm)	GO:0005515(protein binding)	Mm.27925	TC1583552	ENSMUST00000066198	57.1082	153.847	94.4483	24.8282	52.0481	174.851	130.129	156.561
BC046777	0.00389908	0.253022	2.72999	down	BC046777	Bcl7a	4432415N06Rik,AI448316	Mus musculus B-cell CLL/lymphoma 7A, mRNA (cDNA clone MGC:61344 IMAGE:5709511), complete cds.	77045	chr5	123794626	123822943	GO:0008150(biological_process)	GO:0005575(cellular_component)	GO:0003674(molecular_function)	Mm.151960	TC1574928	ENSMUST00000031391	55.3385	147.384	59.0055	67.8032	39.2068	149.979	138.209	153.965
BC046793	0.0126045	0.31095	2.04125	down	BC046793	Mfsd2a	1700018O18Rik,Mfsd2	Mus musculus major facilitator superfamily domain containing 2, mRNA (cDNA clone MGC:61288 IMAGE:5717701), complete cds.	76574	chr4	122624093	122638413	GO:0006810(transport)	GO:0016020(membrane);GO:0016021(integral to membrane)	GO:0005215(transporter activity)	Mm.331842	TC1577655	ENSMUST00000030408	3155.51	6553.39	2845.96	3629.96	2990.61	5408.2	5645.37	8606.58
BC046826	0.0134117	0.317771	4.0515	down	BC046826	Reep1	AW558420,C87808,D6Ertd253e	Mus musculus receptor accessory protein 1, mRNA (cDNA clone MGC:61280 IMAGE:6417744), complete cds.	52250	chr6	71657903	71760699	GO:0051205(protein insertion into membrane)	GO:0005737(cytoplasm);GO:0016020(membrane);GO:0016021(integral to membrane)		Mm.146332	TC1607944		52.0044	188.932	28.7202	86.958	40.335	204.398	173.597	188.802
BC046986	0.00286711	0.234804	2.27417	down	BC046986	1110057K04Rik	-	Mus musculus RIKEN cDNA 1110057K04 gene, mRNA (cDNA clone MGC:54890 IMAGE:6476504), complete cds.	68832	chr12	8227403	8292561	GO:0006629(lipid metabolic process)		GO:0003824(catalytic activity);GO:0016787(hydrolase activity)	Mm.25608	TC1580482	ENSMUST00000037383	5811.42	13074.8	7145.67	5438.28	4850.3	12147.3	14428.6	12648.5
BC048548	0.0386189	0.403287	2.99347	down	BC048548	BC026590	-	Mus musculus cDNA sequence BC026590, mRNA (cDNA clone MGC:58524 IMAGE:6590165), complete cds.	230234	chr4	56815249	56819336				Mm.268148	TC1599319///TC1607131	ENSMUST00000045368	63.1728	186.9	95.9645	38.304	55.2498	164.403	276.424	119.874
BC048711	0.0112315	0.302031	2.21411	down	BC048711	4833442J19Rik	AI256744	Mus musculus RIKEN cDNA 4833442J19 gene, mRNA (cDNA clone MGC:59481 IMAGE:6328428), complete cds.	320204	chr6	149090142	149099692	GO:0006479(protein amino acid methylation)	GO:0005737(cytoplasm)	GO:0008276(protein methyltransferase activity)	Mm.274099	TC1632836///TC1583855	ENSMUST00000047531	552.596	1226.87	564.584	658.54	434.664	1200.52	1516.74	963.343
BC048778	0.0363466	0.397722	2.46116	down	BC048778	Peg3	AL022617,End4,Gcap4,Pw1,Zfp102,mKIAA0287	Mus musculus paternally expressed 3, mRNA (cDNA clone MGC:54729 IMAGE:6308481), complete cds.	18616	chr7	6659381	6668798	GO:0006915(apoptosis)	GO:0005622(intracellular);GO:0005634(nucleus)	GO:0003676(nucleic acid binding);GO:0008270(zinc ion binding);GO:0046872(metal ion binding)	Mm.389800	TC1721304///TC1673750	ENSMUST00000051209	82.2737	207.248	104.198	84.2752	58.3481	241.83	257.022	122.893
BC049186	0.00249113	0.229119	2.13276	down	BC049186	Enc1	Nrpb,PIG10	Mus musculus ectodermal-neural cortex 1, mRNA (cDNA clone MGC:54719 IMAGE:6485551), complete cds.	13803	chr13	98011428	98022989	GO:0006508(proteolysis);GO:0007275(multicellular organismal development)	GO:0005856(cytoskeleton)	GO:0003779(actin binding);GO:0004197(cysteine-type endopeptidase activity);GO:0005515(protein binding)	Mm.241073	TC1580229///TC1611452	ENSMUST00000041623	1690.52	3614.22	1880.72	1471.57	1719.27	3479.05	3145.79	4217.82
BC049654	0.0494893	0.427694	2.21831	down	BC049654	4930534B04Rik	5430424K18Rik,AI449708,AI480494,E230024F20	Mus musculus RIKEN cDNA 4930534B04 gene, mRNA (cDNA clone IMAGE:6771127).	75216	chr12	92236931	92268518				Mm.312204	TC1585866///TC1589707///TC1591636	ENSMUST00000042048///ENSMUST00000021341	51.5732	105.683	82.5506	38.5696	33.5995	111.068	93.3598	112.621
BC050107	0.00466099	0.253022	2.73766	down	BC050107	Hyou1	AI415631,CBP-140,Cab140,Grp170,Orp150	Mus musculus hypoxia up-regulated 1, mRNA (cDNA clone MGC:60469 IMAGE:30012694), complete cds.	12282	chr9	44187667	44200452	GO:0006457(protein folding);GO:0006950(response to stress)	GO:0005615(extracellular space);GO:0005783(endoplasmic reticulum)	GO:0000166(nucleotide binding);GO:0005524(ATP binding)	Mm.116721	TC1577113///TC1595940	ENSMUST00000066601	207.899	563.587	269.539	184.04	170.118	537.903	678.27	474.587
BC050899	0.0164233	0.335284	2.17232	down	BC050899	Emp1	TMP	Mus musculus epithelial membrane protein 1, mRNA (cDNA clone MGC:63263 IMAGE:6402273), complete cds.	13730	chr6	135317510	135333191	GO:0016049(cell growth)	GO:0016020(membrane);GO:0016021(integral to membrane)		Mm.182785	TC1682741	ENSMUST00000032330	209.915	451.451	274.846	163.481	191.417	543.384	358.987	451.981
BC050917	0.00381272	0.253022	2.95751	down	BC050917	Thbs1	TSP-1,TSP1,Thbs-1,tbsp1	Mus musculus thrombospondin 1, mRNA (cDNA clone MGC:63222 IMAGE:6405710), complete cds.	21825	chr2	117937657	117952869	GO:0006954(inflammatory response);GO:0007155(cell adhesion);GO:0016525(negative regulation of angiogenesis)	GO:0005576(extracellular region);GO:0005615(extracellular space)	GO:0005198(structural molecule activity);GO:0005509(calcium ion binding);GO:0005515(protein binding);GO:0008201(heparin binding)	Mm.4159	TC1742856///TC1573966	ENSMUST00000039559	41.7123	126.737	36.9843	44.0387	44.1138	172.761	103.782	103.667
BC051014	0.0217762	0.352113	2.05713	down	BC051014	Pfkfb2	4930568D07Rik	Mus musculus 6-phosphofructo-2-kinase/fructose-2,6-biphosphatase 2, mRNA (cDNA clone MGC:54728 IMAGE:6493944), complete cds.	18640	chr1	132585758	132612311	GO:0006003(fructose 2,6-bisphosphate metabolic process);GO:0008152(metabolic process)		GO:0000166(nucleotide binding);GO:0003824(catalytic activity);GO:0003873(6-phosphofructo-2-kinase activity);GO:0004331(fructose-2,6-bisphosphate 2-phosphatase activity);GO:0005524(ATP binding);GO:0016301(kinase activity);GO:0016740(transferase activity);GO:0016787(hydrolase activity)	Mm.249861	TC1664481///TC1591621///TC1585658///TC1599822	ENSMUST00000066863	140.987	285.244	183.352	136.667	102.942	297.113	229.979	328.638
BC051649	0.00778794	0.277759	2.74563	down	BC051649	Eln	AI385707,AI480567,E030024M20Rik	Mus musculus elastin, mRNA (cDNA clone MGC:51697 IMAGE:5346255), complete cds.	13717	chr5	135178707	135223193	GO:0007519(striated muscle development);GO:0030833(regulation of actin filament polymerization);GO:0043149(stress fiber formation)	GO:0005578(proteinaceous extracellular matrix)	GO:0005198(structural molecule activity);GO:0005201(extracellular matrix structural constituent);GO:0005515(protein binding)	Mm.275320	NP711454		386.225	1034.18	513.09	373.776	271.81	956.356	920.283	1225.9
BC052399	0.0282743	0.374766	2.85021	down	BC052399	Tsc1	hamartin,mKIAA0243	Mus musculus tuberous sclerosis 1, mRNA (cDNA clone MGC:63425 IMAGE:5720967), complete cds.	64930	chr2	28507688	28543891	GO:0001843(neural tube closure);GO:0008285(negative regulation of cell proliferation);GO:0009987(cellular process)	GO:0005737(cytoplasm)	GO:0005515(protein binding)	Mm.224354	TC1614588///TC1717809///NP627186	ENSMUST00000028155	107.154	337.179	104.019	100.671	116.772	206.741	244.364	560.431
BC053023	0.0118595	0.304778	2.26959	down	BC053023	Thbs3	TSP3,Thbs-3	Mus musculus thrombospondin 3, mRNA (cDNA clone MGC:62234 IMAGE:6401682), complete cds.	21827	chr3	89019154	89030759	GO:0007155(cell adhesion)	GO:0005576(extracellular region);GO:0005615(extracellular space)	GO:0005198(structural molecule activity);GO:0005509(calcium ion binding);GO:0005515(protein binding)	Mm.2114	TC1577900	ENSMUST00000029682	121.446	268.542	135.251	82.9324	146.156	238.185	289.396	278.045
BC053107	0.00525165	0.256741	2.37257	down	BC053107	Apex2	C430040P13Rik,ape2	Mus musculus apurinic/apyrimidinic endonuclease 2, mRNA (cDNA clone IMAGE:5686176), with apparent retained intron.	77622	chrX	147006049	147022628	GO:0006281(DNA repair);GO:0006974(response to DNA damage stimulus)	GO:0005634(nucleus);GO:0005743(mitochondrial inner membrane)	GO:0003906(DNA-(apurinic or apyrimidinic site) lyase activity);GO:0004518(nuclease activity);GO:0004519(endonuclease activity);GO:0008270(zinc ion binding);GO:0016829(lyase activity)	Mm.440275	TC1589299///TC1624822///NP514239	ENSMUST00000026303	88.6089	213.985	90.4758	96.3645	78.9864	164.403	271.49	206.062
BC054415	0.000175054	0.147766	2.14542	down	BC054415	Fam134b	1810015C04Rik,AU015349	Mus musculus RIKEN cDNA 1810015C04 gene, mRNA (cDNA clone MGC:62567 IMAGE:3487542), complete cds.	66270	chr15	25870641	25903442		GO:0016021(integral to membrane)		Mm.25311	TC1591249///TC1575432	ENSMUST00000022881	1013.32	2169.04	1090.68	1035.58	913.704	2259.64	2109.31	2138.17
BC054722	0.034336	0.392226	2.49234	down	BC054722	Fdft1	SQS,SS	Mus musculus farnesyl diphosphate farnesyl transferase 1, mRNA (cDNA clone MGC:64758 IMAGE:5694816), complete cds.	14137	chr14	63763987	63796630	GO:0006694(steroid biosynthetic process);GO:0006695(cholesterol biosynthetic process);GO:0008299(isoprenoid biosynthetic process);GO:0008610(lipid biosynthetic process);GO:0009058(biosynthetic process);GO:0016126(sterol biosynthetic process)	GO:0005783(endoplasmic reticulum);GO:0016020(membrane);GO:0016021(integral to membrane)	GO:0000287(magnesium ion binding);GO:0003824(catalytic activity);GO:0004310(farnesyl-diphosphate farnesyltransferase activity);GO:0016491(oxidoreductase activity);GO:0016740(transferase activity)	Mm.436620	TC1573443	ENSMUST00000054963	41.0284	108.901	45.2123	44.6881	33.1847	163.348	99.4694	63.8864
BC054731	0.00489051	0.253472	2.37896	down	BC054731	Fbxo10	FBX10,Gm634	Mus musculus F-box protein 10, mRNA (cDNA clone IMAGE:5709270), partial cds.	269529	chr4	45047123	45097468	GO:0008150(biological_process)	GO:0001726(ruffle);GO:0005737(cytoplasm)	GO:0005515(protein binding)	Mm.389552	TC1581178	ENSMUST00000052236	4279.4	10058.9	5365.84	4082.41	3389.95	11532.3	8864.05	9780.42
BC054782	0.00367535	0.253022	3.08928	down	BC054782	Hspa1a	Hsp70-3,Hsp70.3,Hsp72,MGC189852,hsp68,hsp70A1	Mus musculus heat shock protein 1A, mRNA (cDNA clone MGC:65617 IMAGE:6815894), complete cds.	193740	chr17	35106137	35109069	GO:0000723(telomere maintenance);GO:0006281(DNA repair);GO:0009408(response to heat)		GO:0000166(nucleotide binding);GO:0005524(ATP binding)	Mm.6388	TC1692640///TC1753198///TC1576913	ENSMUST00000087328	174.58	539.736	221.63	153.823	148.285	526.432	670.551	422.227
BC055062	0.00731193	0.274018	2.23462	down	BC055062	Ces5	9030624L02Rik	Mus musculus carboxylesterase 5, mRNA (cDNA clone MGC:62677 IMAGE:6528966), complete cds.	234673	chr8	107450169	107458568		GO:0005615(extracellular space)	GO:0003824(catalytic activity);GO:0004091(carboxylesterase activity);GO:0004759(serine esterase activity);GO:0016787(hydrolase activity);GO:0016789(carboxylic ester hydrolase activity)	Mm.441134	TC1591279///TC1583226	ENSMUST00000034355	50.8745	111.459	42.847	66.9644	42.8122	124.644	104.807	104.926
BC055077	0.0153813	0.330854	2.76246	down	BC055077	Col5a2	1110014L14Rik,D230017N05	Mus musculus collagen, type V, alpha 2, mRNA (cDNA clone MGC:60628 IMAGE:30059991), complete cds.	12832	chr1	45432650	45559867	GO:0006817(phosphate transport);GO:0007155(cell adhesion);GO:0009987(cellular process);GO:0030199(collagen fibril organization)	GO:0005578(proteinaceous extracellular matrix);GO:0005581(collagen);GO:0005588(collagen type V);GO:0005615(extracellular space);GO:0005737(cytoplasm)	GO:0005198(structural molecule activity);GO:0005201(extracellular matrix structural constituent);GO:0030020(extracellular matrix structural constituent conferring tensile strength)	Mm.10299	TC1573197	ENSMUST00000086430	125.105	339.933	149.425	145.634	80.255	433.03	260.934	325.836
BC055437	0.00101816	0.196803	2.76747	down	BC055437	Car6	DOC1	Mus musculus carbonic anhydrase 6, mRNA (cDNA clone MGC:65279 IMAGE:4190566), complete cds.	12353	chr4	149561124	149575230	GO:0006730(one-carbon compound metabolic process)	GO:0005615(extracellular space)	GO:0004089(carbonate dehydratase activity);GO:0008270(zinc ion binding);GO:0016829(lyase activity);GO:0046872(metal ion binding)	Mm.232523	TC1573909	ENSMUST00000030817	186.79	515.344	153.96	208.409	198.002	588.17	458.297	499.565
BC055768	4.46922e-05	0.128519	2.29993	down	BC055768	Doc2a	-	Mus musculus double C2, alpha, mRNA (cDNA clone MGC:67326 IMAGE:6413208), complete cds.	13446	chr7	133991066	133996219	GO:0006810(transport);GO:0006887(exocytosis)	GO:0008021(synaptic vesicle);GO:0016020(membrane);GO:0019717(synaptosome);GO:0045202(synapse)	GO:0005215(transporter activity);GO:0005509(calcium ion binding);GO:0005544(calcium-dependent phospholipid binding)	Mm.440093	TC1583531	ENSMUST00000064110	1596.87	3673.98	1537.96	1684.83	1567.82	3838.29	3748.69	3434.97
BC056454	0.0162098	0.333339	3.20038	down	BC056454	Crygc	Cryg-5	Mus musculus crystallin, gamma C, mRNA (cDNA clone MGC:67068 IMAGE:6824225), complete cds.	12966	chr1	65118105	65120085	GO:0001654(eye development);GO:0007423(sensory organ development);GO:0043010(camera-type eye development)	GO:0005737(cytoplasm)	GO:0005212(structural constituent of eye lens)	Mm.258170	TC1576698	ENSMUST00000027089	39.0554	116.188	50.5429	46.23	20.3932	120.626	120.293	107.645
BC056480	0.0115053	0.302789	2.53482	down	BC056480	Ccdc57	4933434G05Rik	Mus musculus coiled-coil domain containing 57, mRNA (cDNA clone MGC:67410 IMAGE:5689542), complete cds.	71276	chr11	120687855	120794186				Mm.275751	TC1584699	ENSMUST00000056781	87.1144	212.077	81.0294	59.424	120.89	208.011	230.416	197.804
BC056644	0.0383724	0.402779	2.26025	down	BC056644	Acsl1	Acas,Acas1,Acs,FACS,Facl2	Mus musculus acyl-CoA synthetase long-chain family member 1, mRNA (cDNA clone MGC:68224 IMAGE:5098645), complete cds.	14081	chr8	47556545	47620504	GO:0006629(lipid metabolic process);GO:0006631(fatty acid metabolic process);GO:0008152(metabolic process)	GO:0005739(mitochondrion);GO:0005777(peroxisome);GO:0016020(membrane);GO:0016021(integral to membrane)	GO:0000287(magnesium ion binding);GO:0003824(catalytic activity);GO:0004467(long-chain-fatty-acid-CoA ligase activity);GO:0016874(ligase activity)	Mm.210323	TC1576448///TC1575271	ENSMUST00000034046	694.389	1534.94	926.245	718.593	438.33	1153.99	1965.79	1485.04
BC056943	0.0458526	0.422796	2.00839	down	BC056943	Zfp687	4931408L03Rik,mKIAA1441	Mus musculus zinc finger protein 687, mRNA (cDNA clone MGC:66615 IMAGE:6831344), complete cds.	78266	chr3	94810758	94819359	GO:0006350(transcription);GO:0006355(regulation of transcription, DNA-dependent)	GO:0005622(intracellular);GO:0005634(nucleus)	GO:0003676(nucleic acid binding);GO:0003677(DNA binding);GO:0008270(zinc ion binding);GO:0046872(metal ion binding)	Mm.389478	TC1578030	ENSMUST00000019482	204.869	421.29	161.159	251.252	202.194	268.956	526.816	468.098
BC057094	0.00357334	0.253022	3.02269	down	BC057094	Trim65	4732463G12Rik	Mus musculus tripartite motif-containing 65, mRNA (cDNA clone MGC:73514 IMAGE:6418691), complete cds.	338364	chr11	115983159	115992331		GO:0005622(intracellular)	GO:0005515(protein binding);GO:0008270(zinc ion binding);GO:0046872(metal ion binding)	Mm.439976	TC1591481///TC1587391	ENSMUST00000067632	83.0982	247.206	109.683	73.3218	66.2896	203.92	259.941	277.758
BC057185	0.00641114	0.264874	2.58131	down	BC057185	Bgn	BG,DSPG1,PG-S1,PGI,SLRR1A	Mus musculus biglycan, mRNA (cDNA clone IMAGE:5067188), complete cds.	12111	chrX	70728982	70737723		GO:0005578(proteinaceous extracellular matrix);GO:0005615(extracellular space)	GO:0005515(protein binding)	Mm.2608	TC1617325///TC1742914	ENSMUST00000033741	80.3536	201.168	84.4329	55.1868	101.441	209.765	196.224	197.514
BC057651	0.0151518	0.329783	3.45104	down	BC057651	N/A	N/A	Mus musculus cDNA clone IMAGE:2864841, **** WARNING: chimeric clone ****.	N/A	chr13	58688065	58712238							58.0011	190.601	90.7913	42.2951	40.9168	224.031	211.443	136.328
BC057665	0.00581392	0.26248	2.28354	down	BC057665	Gna13	AU024132,AU043124,Galpha13	Mus musculus guanine nucleotide binding protein, alpha 13, mRNA (cDNA clone MGC:68178 IMAGE:4918717), complete cds.	14674	chr11	109224253	109259519	GO:0001525(angiogenesis);GO:0001569(patterning of blood vessels);GO:0001701(in utero embryonic development);GO:0007165(signal transduction);GO:0007186(G-protein coupled receptor protein signaling pathway);GO:0007243(protein kinase cascade);GO:0007266(Rho protein signal transduction);GO:0008360(regulation of cell shape);GO:0030154(cell differentiation);GO:0030168(platelet activation);GO:0030334(re…	GO:0005834(heterotrimeric G-protein complex);GO:0016020(membrane)	GO:0000166(nucleotide binding);GO:0003924(GTPase activity);GO:0004871(signal transducer activity);GO:0005515(protein binding);GO:0005525(GTP binding);GO:0019001(guanyl nucleotide binding)	Mm.193925	TC1774844///TC1652578///TC1587902		427.179	981.478	495.961	426.842	358.734	1193.99	782.283	968.155
BC057895	0.0253735	0.362655	2.51715	down	BC057895	Taf8	AW260255,Tbn	Mus musculus TAF8 RNA polymerase II, TATA box binding protein (TBP)-associated factorq, mRNA (cDNA clone MGC:68125 IMAGE:5031867), complete cds.	63856	chr17	47625248	47639223	GO:0045598(regulation of fat cell differentiation);GO:0045893(positive regulation of transcription, DNA-dependent)	GO:0005634(nucleus);GO:0005669(transcription factor TFIID complex)	GO:0005515(protein binding);GO:0016563(transcriptional activator activity)	Mm.275901	TC1597004	ENSMUST00000067103	203.969	495.888	272.379	215.164	124.364	587.88	518.238	381.546
BC057934	0.00295807	0.238501	6.73764	down	BC057934	Krt15	AI528832,K15,Krt1-15	Mus musculus keratin 15, mRNA (cDNA clone MGC:68208 IMAGE:5251453), complete cds.	16665	chr11	99993078	99997242	GO:0007010(cytoskeleton organization and biogenesis)	GO:0005882(intermediate filament)	GO:0005198(structural molecule activity);GO:0005200(structural constituent of cytoskeleton)	Mm.440010	TC1580208	ENSMUST00000007273	199.226	1366.4	148.573	177.167	271.94	1782.2	821.349	1495.66
BC059002	0.00501734	0.253601	2.28006	down	BC059002	A2bp1	A2bp,Hrnbp1,fox-1	Mus musculus ataxin 2 binding protein 1, mRNA (cDNA clone MGC:69598 IMAGE:6821627), complete cds.	268859	chr16	5885090	7411611			GO:0000166(nucleotide binding);GO:0003676(nucleic acid binding);GO:0003723(RNA binding)	Mm.370334	TC1602432	ENSMUST00000056416	40.0647	92.3963	34.9704	40.926	44.2978	106.337	70.2426	100.609
BC059819	0.00016175	0.147766	2.71459	down	BC059819	Acer2	2410116I05Rik,Asah3l,CRG-L1,maCER2	Mus musculus N-acylsphingosine amidohydrolase 3-like, mRNA (cDNA clone MGC:69583 IMAGE:6839525), complete cds.	230379	chr4	86520317	86566779	GO:0006629(lipid metabolic process);GO:0006672(ceramide metabolic process)	GO:0000139(Golgi membrane);GO:0005789(endoplasmic reticulum membrane);GO:0016020(membrane);GO:0016021(integral to membrane)	GO:0016787(hydrolase activity);GO:0016811(hydrolase activity, acting on carbon-nitrogen (but not peptide) bonds, in linear amides);GO:0017040(ceramidase activity)	Mm.45019	TC1598986///TC1585840	ENSMUST00000045224///ENSMUST00000074334	199.978	542.481	190.795	222.178	186.962	533.187	502.303	591.954
BC060973	0.00225269	0.227726	3.25277	down	BC060973	Cyp2b10	Cyp2b,Cyp2b20,p16	Mus musculus cytochrome P450, family 2, subfamily b, polypeptide 10, mRNA (cDNA clone MGC:74066 IMAGE:30301385), complete cds.	13088	chr7	26682682	26711640	GO:0006118(electron transport)	GO:0005783(endoplasmic reticulum);GO:0005792(microsome);GO:0016020(membrane)	GO:0004497(monooxygenase activity);GO:0005506(iron ion binding);GO:0016491(oxidoreductase activity);GO:0016712(oxidoreductase activity, acting on paired donors, with incorporation or reduction of molecular oxygen, reduced flavin or flavoprotein as one donor, and incorporation of one atom of oxygen);GO:0020037(heme binding);GO:0046872(metal ion binding);GO:0050381(unspecific monooxygenase activity)	Mm.218749	NP1482615	ENSMUST00000072438///ENSMUST00000005477	1645.12	5331.51	1626.35	2014.61	1294.41	5210.38	4362.05	6422.1
BC061053	0.00378615	0.253022	5.85165	down	BC061053	Ren1	D19352,Ren,Ren-1,Ren-A,Ren1c,Ren1d,Rn-1,Rnr	Mus musculus renin 1 structural, mRNA (cDNA clone MGC:74164 IMAGE:30313659), complete cds.	19701	chr1	135247252	135256862	GO:0006508(proteolysis);GO:0008065(establishment of blood-nerve barrier);GO:0009755(hormone-mediated signaling);GO:0042756(drinking behavior);GO:0048469(cell maturation)	GO:0005615(extracellular space)	GO:0004190(aspartic-type endopeptidase activity);GO:0004194(pepsin A activity);GO:0004195(renin activity);GO:0008233(peptidase activity);GO:0016787(hydrolase activity)	Mm.220955	NP062662///NP045846	ENSMUST00000094556	106.198	576.658	167.95	65.6685	84.9751	655.61	583.393	490.972
BC062129	0.000178952	0.147766	2.43022	down	BC062129	Coq10b	1500041J02Rik,1700030I21Rik,9530077A17Rik,AV002237,AW742641	Mus musculus coenzyme Q10 homolog B (S. cerevisiae), mRNA (cDNA clone MGC:69951 IMAGE:6506502), complete cds.	67876	chr1	55109717	55129130		GO:0005739(mitochondrion)		Mm.281019	TC1604673///TC1686449///TC1631849///TC1591014	ENSMUST00000027125///ENSMUST00000087617	1529.77	3720.21	1663.95	1455.84	1469.52	4087.85	3620.62	3452.16
BC062158	0.00347057	0.251171	2.2139	down	BC062158	Mybpc1	8030451F13Rik	Mus musculus RIKEN cDNA 8030451F13 gene, mRNA (cDNA clone MGC:70062 IMAGE:30134842), complete cds.	109272	chr10	87981027	88067759				Mm.147208	TC1653747	ENSMUST00000005247	298.141	650.951	339.705	325.502	229.216	648.468	617.021	687.365
BC062250	0.00228135	0.227726	3.2393	down	BC062250	Vpreb3	8HS-20,AI528709,Vpreb-3	Mus musculus pre-B lymphocyte gene 3, mRNA (cDNA clone MGC:73628 IMAGE:1246296), complete cds.	22364	chr10	75411076	75412393		GO:0005615(extracellular space)		Mm.333851	TC1705768	ENSMUST00000000926	186.97	588.312	248.526	138.936	173.447	581.357	599.446	584.132
BC063051	0.00542882	0.257606	2.81918	down	BC063051	Plk3	Cnk,Fnk,PRK	Mus musculus polo-like kinase 3 (Drosophila), mRNA (cDNA clone MGC:66660 IMAGE:5718130), complete cds.	12795	chr4	116801259	116806557	GO:0006468(protein amino acid phosphorylation)		GO:0000166(nucleotide binding);GO:0004672(protein kinase activity);GO:0004674(protein serine/threonine kinase activity);GO:0005515(protein binding);GO:0005524(ATP binding);GO:0016301(kinase activity);GO:0016740(transferase activity)	Mm.259022	NP539984	ENSMUST00000076859	137.845	378.19	189.59	112.348	111.596	433.032	344.01	357.528
BC063090	0.0386938	0.403509	2.43269	down	BC063090	N/A	N/A	Mus musculus cDNA clone IMAGE:6518479, partial cds.	N/A	chr7	6683451	6704179							72.6684	176.645	51.7014	63.5249	102.779	187.744	229.311	112.881
BC063331	0.00203213	0.220964	2.85747	down	BC063331	Zfp791	EG244556,MGC117728	Mus musculus zinc finger protein 791, mRNA (cDNA clone MGC:74368 IMAGE:30295602), complete cds.	244556	chr8	87632457	87643587							562.143	1579.52	720.176	455.886	510.367	1686.17	1422.66	1629.74
BC065081	0.00229992	0.227726	3.73	down	BC065081	Tbc1d8	AD3,HBLP1,VRP	Mus musculus TBC1 domain family, member 8, mRNA (cDNA clone MGC:86046 IMAGE:6832495), complete cds.	54610	chr1	39428706	39535526	GO:0006457(protein folding);GO:0008150(biological_process)	GO:0005575(cellular_component);GO:0005622(intracellular);GO:0016021(integral to membrane)	GO:0003674(molecular_function);GO:0005096(GTPase activator activity);GO:0005097(Rab GTPase activator activity)	Mm.387293	TC1576889	ENSMUST00000054462	729.21	2621.62	1015.86	542.167	629.601	2667.85	2515.19	2681.81
BC065131	0.0103068	0.29345	2.58207	down	BC065131	Fosl2	Fra-2	Mus musculus fos-like antigen 2, mRNA (cDNA clone MGC:85989 IMAGE:30536144), complete cds.	14284	chr5	32438906	32460212	GO:0006355(regulation of transcription, DNA-dependent)	GO:0005634(nucleus)	GO:0003677(DNA binding);GO:0003700(transcription factor activity);GO:0046983(protein dimerization activity)	Mm.24684	TC1620210///TC1580363	ENSMUST00000031017	860.549	2135.77	1207.17	605.546	768.934	2153.84	1952.24	2301.23
BC066019	0.00217967	0.225631	4.81	down	BC066019	Cyr61	AI325051,CCN1,Igfbp10	Mus musculus cysteine rich protein 61, mRNA (cDNA clone MGC:90137 IMAGE:5716887), complete cds.	16007	chr3	145309939	145312929	GO:0001558(regulation of cell growth);GO:0001569(patterning of blood vessels);GO:0006935(chemotaxis);GO:0007155(cell adhesion)	GO:0005576(extracellular region);GO:0005615(extracellular space)	GO:0005515(protein binding);GO:0005520(insulin-like growth factor binding);GO:0008201(heparin binding);GO:0019838(growth factor binding)	Mm.1231	TC1572761	ENSMUST00000029846	147.529	696.986	202.845	129.552	110.19	839.55	538.089	713.321
BC066798	0.0417303	0.412286	2.20267	down	BC066798	Pus7l	3000003F02Rik	Mus musculus pseudouridylate synthase 7 homolog (S. cerevisiae)-like, mRNA (cDNA clone MGC:76467 IMAGE:30469996), complete cds.	78895	chr15	94353125	94371405	GO:0008033(tRNA processing)		GO:0004730(pseudouridylate synthase activity)	Mm.34344	TC1595435///TC1698563	ENSMUST00000049151	106.308	244.269	110.434	83.609	124.882	235.58	346.083	151.143
BC067076	0.00915114	0.285935	2.11892	down	BC067076	Manea	4932703L02Rik	Mus musculus mannosidase, endo-alpha, mRNA (cDNA clone MGC:91328 IMAGE:30628555), complete cds.	242362	chr4	26251652	26273799		GO:0005615(extracellular space);GO:0016020(membrane);GO:0016021(integral to membrane)	GO:0004569(glycoprotein endo-alpha-1,2-mannosidase activity);GO:0016787(hydrolase activity)	Mm.245602	TC1584427///TC1620709///TC1612090	ENSMUST00000041374	60.8109	130.176	60.8347	69.6139	51.9842	148.951	143.782	97.7949
BC069893	0.0395256	0.405848	2.30285	down	BC069893	Egln3	2610021G09Rik,AI505553,AI648162,Phd3,SM-20	Mus musculus EGL nine homolog 3 (C. elegans), mRNA (cDNA clone MGC:78112 IMAGE:4978765), complete cds.	112407	chr12	55281249	55304777	GO:0006915(apoptosis);GO:0019538(protein metabolic process)	GO:0005634(nucleus)	GO:0005506(iron ion binding);GO:0005515(protein binding);GO:0016491(oxidoreductase activity);GO:0016702(oxidoreductase activity, acting on single donors with incorporation of molecular oxygen, incorporation of two atoms of oxygen);GO:0016706(oxidoreductase activity, acting on paired donors, with incorporation or reduction of molecular oxygen, 2-oxoglutarate as one donor, and incorporation of one …	Mm.133037	NP855602	ENSMUST00000039516	147.062	364.595	152.428	137.9	150.858	334.354	211.302	548.13
BC070401	0.000273838	0.150986	2.8956	down	BC070401	Sgk1	Sgk	Mus musculus serum/glucocorticoid regulated kinase, mRNA (cDNA clone MGC:99446 IMAGE:5695396), complete cds.	20393	chr10	21601989	21719699	GO:0006468(protein amino acid phosphorylation);GO:0006915(apoptosis);GO:0006974(response to DNA damage stimulus)	GO:0005634(nucleus);GO:0005783(endoplasmic reticulum)	GO:0000166(nucleotide binding);GO:0004672(protein kinase activity);GO:0004674(protein serine/threonine kinase activity);GO:0005515(protein binding);GO:0005524(ATP binding);GO:0016301(kinase activity);GO:0016740(transferase activity)	Mm.28405	TC1609075///TC1585076	ENSMUST00000020145	410.298	1192.62	442.135	409.647	379.112	1199.7	1033.04	1345.11
BC070436	0.0330009	0.390416	3.7947	down	BC070436	Ror2	Ntrkr2,mRor2	Mus musculus receptor tyrosine kinase-like orphan receptor 2, mRNA (cDNA clone MGC:99876 IMAGE:30535615), complete cds.	26564	chr13	53204685	53381478	GO:0001501(skeletal development);GO:0001502(cartilage condensation);GO:0001756(somitogenesis);GO:0006468(protein amino acid phosphorylation);GO:0007223(Wnt receptor signaling pathway, calcium modulating pathway);GO:0007254(JNK cascade);GO:0007275(multicellular organismal development);GO:0030154(cell differentiation);GO:0030538(embryonic genitalia morphogenesis)	GO:0005615(extracellular space);GO:0005887(integral to plasma membrane);GO:0016020(membrane);GO:0016021(integral to membrane)	GO:0000166(nucleotide binding);GO:0004672(protein kinase activity);GO:0004713(protein-tyrosine kinase activity);GO:0004714(transmembrane receptor protein tyrosine kinase activity);GO:0004872(receptor activity);GO:0005515(protein binding);GO:0005524(ATP binding);GO:0016301(kinase activity);GO:0016740(transferase activity)	Mm.342774	TC1580963	ENSMUST00000021918	56.6212	186.214	95.2417	23.5153	51.1067	225.49	163.366	169.785
BC070445	0.0344943	0.392558	4.12024	down	BC070445	Fbxo41	9630017H13,D6Ertd538e	Mus musculus F-box protein 41, mRNA (cDNA clone MGC:91304 IMAGE:30536738), complete cds.	330369	chr6	85420532	85452988	GO:0006512(ubiquitin cycle)	GO:0005622(intracellular);GO:0005634(nucleus)	GO:0003676(nucleic acid binding);GO:0005515(protein binding);GO:0008270(zinc ion binding);GO:0046872(metal ion binding)	Mm.38777	TC1608692///TC1583007	ENSMUST00000054506	73.0931	276.572	112.937	30.2529	76.0895	247.632	184.868	397.216
BC072593	0.0437956	0.41712	2.01269	down	BC072593	Sipa1l2	BC058408,mKIAA1389	Mus musculus signal-induced proliferation-associated 1 like 2, mRNA (cDNA clone IMAGE:6412997), partial cds.	244668	chr8	127941962	128093656	GO:0051056(regulation of small GTPase mediated signal transduction)	GO:0005622(intracellular)	GO:0005096(GTPase activator activity);GO:0005515(protein binding)	Mm.271668	TC1639733	ENSMUST00000047850	120.218	247.945	141.824	125.605	93.2257	273.899	310.965	158.973
BC075704	0.00334742	0.246102	2.85089	down	BC075704	Aldh1a2	AV116159,Aldh1a7,Raldh1,Raldh2	Mus musculus aldehyde dehydrogenase family 1, subfamily A2, mRNA (cDNA clone MGC:76772 IMAGE:30471325), complete cds.	19378	chr9	71063628	71144043	GO:0008152(metabolic process);GO:0008284(positive regulation of cell proliferation);GO:0009855(determination of bilateral symmetry);GO:0009952(anterior/posterior pattern formation);GO:0009954(proximal/distal pattern formation);GO:0016331(morphogenesis of embryonic epithelium);GO:0030182(neuron differentiation);GO:0030326(embryonic limb morphogenesis);GO:0030900(forebrain development);GO:0030902(h…		GO:0001758(retinal dehydrogenase activity);GO:0004028(3-chloroallyl aldehyde dehydrogenase activity);GO:0016491(oxidoreductase activity)	Mm.42016	TC1583532	ENSMUST00000034723	33.8667	98.3672	29.6154	37.4063	34.5784	125.314	96.0355	73.7527
BC078449	0.0216291	0.351374	2.09004	down	BC078449	Slc18a2	1110037L13Rik,9330105E13,MGC90556,Vmat2	Mus musculus solute carrier family 18 (vesicular monoamine), member 2, mRNA (cDNA clone MGC:90556 IMAGE:5705966), complete cds.	214084	chr19	59335452	59370502	GO:0006810(transport);GO:0006836(neurotransmitter transport);GO:0015904(tetracycline transport)	GO:0005887(integral to plasma membrane);GO:0016020(membrane);GO:0016021(integral to membrane)	GO:0005215(transporter activity);GO:0005386(carrier activity);GO:0015520(tetracycline:hydrogen antiporter activity)	Mm.361919	TC1589974	ENSMUST00000026084	194.617	399.455	260.531	177.31	146.009	323.638	405.503	469.224
BC085138	0.0438427	0.41712	2.44529	down	BC085138	Lphn1	2900070I05Rik,AI182398,CLIBA,Lec2,MGC109680,mKIAA0821	Mus musculus latrophilin 1, mRNA (cDNA clone MGC:109680 IMAGE:6405470), complete cds.	330814	chr8	86424613	86463874	GO:0007165(signal transduction);GO:0007186(G-protein coupled receptor protein signaling pathway);GO:0007218(neuropeptide signaling pathway);GO:0008150(biological_process)	GO:0005575(cellular_component);GO:0016020(membrane);GO:0016021(integral to membrane)	GO:0003674(molecular_function);GO:0004871(signal transducer activity);GO:0004872(receptor activity);GO:0004930(G-protein coupled receptor activity);GO:0005529(sugar binding);GO:0016524(latrotoxin receptor activity)	Mm.260733	TC1686849///TC1716123///TC1581133	ENSMUST00000045393///ENSMUST00000093386	88.6066	203.113	65.4487	141.728	58.6432	202.066	249.53	157.742
BC086620	0.00193695	0.217941	2.0963	down	BC086620	Sec14l1	1200017E04Rik,2810012L19Rik,Naa-35	Mus musculus cDNA clone IMAGE:6400665, containing frame-shift errors.	74136	chr11	116976562	117020582	GO:0006810(transport)	GO:0005622(intracellular)	GO:0005215(transporter activity)	Mm.272312	TC1591731///TC1575412	ENSMUST00000103026	629.005	1306.47	700.599	510.475	675.94	1267.29	1360.39	1291.74
BC086689	0.0454483	0.42141	2.29152	down	BC086689	Rgr	-	Mus musculus cDNA clone IMAGE:30683086.	57811	chr14	37848094	37862150	GO:0007165(signal transduction);GO:0007186(G-protein coupled receptor protein signaling pathway);GO:0007601(visual perception);GO:0007602(phototransduction);GO:0018298(protein-chromophore linkage);GO:0050896(response to stimulus)	GO:0005615(extracellular space);GO:0005887(integral to plasma membrane);GO:0016020(membrane);GO:0016021(integral to membrane)	GO:0001584(rhodopsin-like receptor activity);GO:0004871(signal transducer activity);GO:0004872(receptor activity);GO:0004930(G-protein coupled receptor activity)	Mm.20460	TC1579993	ENSMUST00000022338	77.5546	182.825	102.781	61.5742	68.3091	228.061	213.661	106.753
BC089303	0.00722149	0.274018	2.43691	down	BC089303	Dip2c	2900024P20Rik,9630044M06,KIAA0934,mKIAA0934	Mus musculus DIP2 disco-interacting protein 2 homolog C (Drosophila), mRNA (cDNA clone IMAGE:30545711), partial cds.	208440	chr13	9608189	9668171	GO:0008152(metabolic process)	GO:0005634(nucleus)	GO:0003824(catalytic activity);GO:0008134(transcription factor binding);GO:0016874(ligase activity)	Mm.217326	TC1582894///TC1584339		67.6669	164.006	86.0969	61.5515	55.3522	128.534	183.596	179.888
BC089455	0.0214287	0.351353	3.13468	down	BC089455	Ikzf5	2610034F18Rik,MGC106439,PEGASUS,Zfpn1a5	Mus musculus IKAROS family zinc finger 5, mRNA (cDNA clone MGC:106439 IMAGE:30627874), complete cds.	67143	chr7	138533880	138554014		GO:0005622(intracellular)	GO:0003676(nucleic acid binding);GO:0008270(zinc ion binding);GO:0046872(metal ion binding)	Mm.334273	TC1599148	ENSMUST00000046306	99.4071	314.767	142.285	84.491	71.4456	280.385	457.813	206.102
BC090258	0.0190791	0.345803	2.97375	down	BC090258	Ifitm1	1110036C17Rik,MGC107121,Mil2	Mus musculus interferon induced transmembrane protein 1, mRNA (cDNA clone MGC:102334 IMAGE:4982747), complete cds.	68713	chr7	148154146	148155712	GO:0001756(somitogenesis);GO:0009607(response to biotic stimulus);GO:0009952(anterior/posterior pattern formation)	GO:0016021(integral to membrane)		Mm.175661	TC1734172	ENSMUST00000026564	56.8482	177.429	73.1613	47.6168	49.7666	274.546	129.898	127.842
BC090642	0.0213083	0.351353	3.26924	down	BC090642	Crispld2	1810049K24Rik,Lcrisp2,Lgl1,MGC116029,coffeecrisp	Mus musculus cysteine-rich secretory protein LCCL domain containing 2, mRNA (cDNA clone MGC:116029 IMAGE:30653388), complete cds.	78892	chr8	122516375	122575696		GO:0005576(extracellular region)		Mm.264680	TC1574954	ENSMUST00000098357	41.0111	134.039	24.681	54.0432	44.309	197.288	107.034	97.7949
BC090972	0.0450707	0.420167	2.23514	down	BC090972	Ifitm1	1110036C17Rik,MGC107121,Mil2	Mus musculus interferon induced transmembrane protein 1, mRNA (cDNA clone MGC:107121 IMAGE:30297959), complete cds.	68713	chr7	148154046	148155724	GO:0001756(somitogenesis);GO:0009607(response to biotic stimulus);GO:0009952(anterior/posterior pattern formation)	GO:0016021(integral to membrane)		Mm.175661	TC1734172	ENSMUST00000026564	53.0186	121.113	67.3738	54.2545	37.4275	175.907	83.8074	103.626
BC091645	0.002406	0.229119	2.22834	down	BC091645	Per1	MGC102121,Per,m-rigui,mPer1	Mus musculus period homolog 1 (Drosophila), mRNA (cDNA clone MGC:102121 IMAGE:30355259), complete cds.	18626	chr11	68912470	68923452	GO:0000160(two-component signal transduction system (phosphorelay));GO:0006350(transcription);GO:0006355(regulation of transcription, DNA-dependent);GO:0007165(signal transduction);GO:0007623(circadian rhythm);GO:0016481(negative regulation of transcription);GO:0048511(rhythmic process)	GO:0005634(nucleus)	GO:0000155(two-component sensor activity);GO:0004871(signal transducer activity);GO:0005515(protein binding)	Mm.7373	NP1487658	ENSMUST00000102605	431.722	957.841	505.572	425.661	363.934	832.095	1000.53	1040.9
BC094027	0.00381931	0.253022	2.22207	down	BC094027	Btg3	ANA,tob5	Mus musculus B-cell translocation gene 3, mRNA (cDNA clone MGC:103173 IMAGE:4457150), complete cds.	12228	chr16	78360110	78377010	GO:0008285(negative regulation of cell proliferation);GO:0045930(negative regulation of progression through mitotic cell cycle)	GO:0005737(cytoplasm)	GO:0005515(protein binding)	Mm.2823	TC1641046	ENSMUST00000023570	527.617	1162.38	511.921	431.054	639.876	1320.28	1062.74	1104.11
BC094038	0.00655321	0.264874	2.52243	down	BC094038	C920025E04Rik	MGC102517	Mus musculus RIKEN cDNA C920025E04 gene, mRNA (cDNA clone MGC:102517 IMAGE:5009062), complete cds.	667803	chr17	36168605	36248628							518.643	1290.79	668.201	399.186	488.542	1271.8	1085.18	1515.39
BC094286	0.000252094	0.150986	4.03258	down	BC094286	Lsm11	2210404M20Rik,AV079530	Mus musculus U7 snRNP-specific Sm-like protein LSM11, mRNA (cDNA clone MGC:106282 IMAGE:5294386), complete cds.	72290	chr11	45747053	45758419	GO:0006397(mRNA processing);GO:0008380(RNA splicing);GO:0016071(mRNA metabolic process)	GO:0005634(nucleus);GO:0005732(small nucleolar ribonucleoprotein complex);GO:0030529(ribonucleoprotein complex)	GO:0003723(RNA binding)	Mm.249827	TC1583650	ENSMUST00000062458	36.0817	147.318	36.678	34.5788	36.9883	129.909	130.277	181.769
BC095982	0.0491076	0.427659	2.52999	down	BC095982	Il15ra	AA690181	Mus musculus interleukin 15 receptor, alpha chain, mRNA (cDNA clone IMAGE:4457379), complete cds.	16169	chr2	11644790	11655589	GO:0007166(cell surface receptor linked signal transduction)	GO:0005615(extracellular space);GO:0005634(nucleus);GO:0005783(endoplasmic reticulum);GO:0005887(integral to plasma membrane);GO:0016020(membrane);GO:0016021(integral to membrane)	GO:0004872(receptor activity);GO:0004907(interleukin receptor activity);GO:0005515(protein binding)	Mm.200196	NP646214	ENSMUST00000078834	104.285	239.315	172.65	81.6225	58.5827	281.804	228.739	207.402
BC096603	0.00259573	0.230251	2.95783	down	BC096603	N/A	N/A	Mus musculus cDNA clone IMAGE:5290654.	N/A	chr9	96585841	96653104							103.522	305.077	79.7907	115.35	115.425	325.846	344.443	244.942
BC099522	0.00901511	0.284168	2.77067	down	BC099522	1190007F08Rik	0610011H04Rik,2700009I11Rik	Mus musculus RIKEN cDNA 1190007F08 gene, mRNA (cDNA clone IMAGE:30849005).	68859	chr4	153394701	153399730				Mm.260690	TC1617749///TC1634650	ENSMUST00000097765///ENSMUST00000097764	42.7708	118.859	51.8105	44.8366	31.6653	142.57	128.822	85.1859
BC099679	0.00872816	0.280696	3.20133	down	BC099679	Plk5	6330514A18Rik,MGC106082	Mus musculus RIKEN cDNA 6330514A18 gene, mRNA (cDNA clone MGC:106082 IMAGE:6489647), complete cds.	216166	chr10	79819203	79828226	GO:0006468(protein amino acid phosphorylation)		GO:0000166(nucleotide binding);GO:0000287(magnesium ion binding);GO:0004672(protein kinase activity);GO:0004674(protein serine/threonine kinase activity);GO:0005515(protein binding);GO:0005524(ATP binding);GO:0016301(kinase activity);GO:0016740(transferase activity);GO:0046872(metal ion binding)	Mm.17613	TC1595394	ENSMUST00000039836	42.5239	134.589	42.0044	56.253	29.3144	100.841	171.584	131.34
BC100354	0.00148139	0.198715	2.83722	down	BC100354	Zfp791	EG244556,MGC117728	Mus musculus zinc finger protein 791, mRNA (cDNA clone MGC:117728 IMAGE:30935270), complete cds.	244556	chr8	87633065	87646994							436.429	1234.47	528.813	390.824	389.649	1332.11	1027.3	1344
[truncated: 111 more rows]

## Sheet: Ro60_316-335 vs PBS control
	P-value		Fold change and Regulation		Annotations														Group--Normalized Intensity		Individual Normalized Intensity
[truncated: 508 more rows]

## Sheet: PBS control vs untreated
	P-value		Fold change and Regulation		Annotations														Group--Normalized Intensity		Normalized Intensity
[truncated: 957 more rows]
