# Supplementary material for: Gene Expression Profiling of Lacrimal Glands Identifies the Ectopic Expression of MHC II on Glandular Cells as a Presymptomatic Feature in a Mouse Model of Primary Sjögren's Syndrome
Source: Front Immunol. 2018 Oct 31;9:2362. doi: 10.3389/fimmu.2018.02362 (PMC6220427; doi:10.3389/fimmu.2018.02362)
Supplement: Supplementary file 2 [file Table_2.xlsx]

## Sheet: Worksheet legend
Worksheet	Description
Ro60_316-335 vs untreated	Differentially expressed genes (DEGs) in the lacrimal glands of Ro60_316-335 immunized mice compared to untreated mice at 2 weeks after immunization
Ro60_316-335 vs PBS control	Differentially expressed genes (DEGs) in the lacrimal glands of Ro60_316-335 immunized mice compared to PBS control immunized mice at 2 weeks after immunization
PBS control vs untreated	Differentially expressed genes (DEGs) in the lacrimal glands of PBS control immunized mice compared to untreated mice at 2 weeks after immunization

## Sheet: Column legend
Column	Description
SEQ_ID	It represents probe name.
P-value	P-value calculated from t-test.
FDR	FDR (False Discovery Rate) calculated from Benjamini Hochberg FDR.
FCAbsolute	The absolute ratio (no log scale) of normalized intensities between two conditions.
Regulation	Regulation, it depicts which group has greater or lower intensity values wrt other group.
Annotations	Include ACCESSION, GENE_NAME, SYNONYM, DESCRIPTION, GENE_ID, CHROMOSOME, START, STOP, GO biological process, GO cellular component, GO molecular function, UniGene, TIGRID, EnsemblID.
Group--Normalized Intensity	Normalized Intensity of each group (averaged normalized intensities of replicate samples).
Individual Normalized Intensity	Normalized Intensity of each sample.

## Sheet: Ro60_316-335 vs untreated
	P-value		Fold change and Regulation		Annotations														Group--Normalized Intensity		Individual Normalized Intensity
SEQ_ID	p-value	FDR	FCAbsolute	regulation	ACCESSION	GENE_NAME	SYNONYM	DESCRIPTION	GENE_ID	CHROMOSOME	START	STOP	GO biological process	GO cellular component	GO molecular function	UniGene	TIGRID	EnsemblID	Ro60_316-335	untreated	Ro60_316-335 1	Ro60_316-335 2	Ro60_316-335 3	untreated 1	untreated 2	untreated 3
AB033524	3.53111e-05	0.060921	2.11951	up	AB033524	N/A	N/A	Mus musculus early transposon ETn mRNA, 5' end region, clone:N5-4.	N/A	chr7	138966146	138966306							5633.49	2661.22	5709.12	5552.79	5638.56	2480.15	2699.59	2803.92
AB049605	0.04289	0.314914	2.28059	up	AB049605	Cav2	AI447843	Mus musculus mRNA for caveolin-2 isoform, complete cds.	12390	chr6	17231340	17232684	GO:0001937(negative regulation of endothelial cell proliferation);GO:0006897(endocytosis);GO:0007005(mitochondrion organization and biogenesis);GO:0007029(endoplasmic reticulum organization and biogenesis);GO:0008285(negative regulation of cell proliferation);GO:0051259(protein oligomerization)	GO:0005886(plasma membrane);GO:0005887(integral to plasma membrane);GO:0005901(caveola);GO:0016020(membrane);GO:0016021(integral to membrane);GO:0016599(caveolar membrane);GO:0045121(lipid raft);GO:0048471(perinuclear region of cytoplasm)	GO:0005515(protein binding);GO:0042803(protein homodimerization activity)	Mm.396075	TC1575293///TC1592826	ENSMUST00000000058	115.797	52.03	85.0221	114.974	147.394	60.4486	64.4742	31.1672
AB055855	0.00615808	0.169828	6.15248	up	AB055855	Gmcl1l	1700017G21Rik,Gclh,Gmcl2,MGC107240,MGC141289	Mus musculus mgclh mRNA, Type 2, complete cds.	71847	chrX	30598330	30600258	GO:0007275(multicellular organismal development);GO:0007283(spermatogenesis);GO:0030154(cell differentiation)	GO:0005634(nucleus)	GO:0005515(protein binding)	Mm.379203	TC1585593	ENSMUST00000063206	284.296	51.6619	274.994	250.772	327.121	87.9428	38.2386	28.8044
AB093284	0.000648325	0.094791	2.8186	up	AB093284	Zmynd8	1110013E22Rik,2010005I16Rik,3632413B07Rik,AI316811,AL024039,MGC25852,Prkcbp1,RACK7,mKIAA1125	Mus musculus mRNA for mKIAA1125 protein.	228880	chr2	165609653	165703068			GO:0005515(protein binding);GO:0008270(zinc ion binding);GO:0016301(kinase activity)	Mm.227598///Mm.393102	TC1669649///TC1582373///TC1715711///TC1771024	ENSMUST00000018050///ENSMUST00000099084///ENSMUST00000099083	1054.84	371.56	864.904	1103.12	1196.5	343.169	370.008	401.503
AB112023	0.0471071	0.325414	2.38715	up	AB112023	Sirpb1	9930027N05Rik,SIRP-beta,Sirpb	Mus musculus SIRP-beta mRNA for SIRP-beta A-type, partial cds, strain: C57BL/6.	320832	chr3	15503101	15748487	GO:0007242(intracellular signaling cascade);GO:0050766(positive regulation of phagocytosis)	GO:0005886(plasma membrane);GO:0016020(membrane);GO:0016021(integral to membrane)	GO:0004872(receptor activity)	Mm.425126	TC1588672///TC1678925	ENSMUST00000050623///ENSMUST00000099201	108.105	44.8851	116.19	142.699	65.4254	35.092	35.4366	64.1267
AB250383	0.0117377	0.20678	2.06976	up	AB250383	Ldb1	CLIM2,NLI	Mus musculus Ldb1 mRNA for LIM-domain-binding protein 1b (Ldb1b), complete cds.	16825	chr19	46108451	46110855	GO:0007275(multicellular organismal development);GO:0009948(anterior/posterior axis specification);GO:0010003(gastrulation (sensu Mammalia));GO:0016055(Wnt receptor signaling pathway);GO:0030182(neuron differentiation);GO:0045647(negative regulation of erythrocyte differentiation);GO:0045892(negative regulation of transcription, DNA-dependent)	GO:0005634(nucleus);GO:0043234(protein complex)	GO:0003712(transcription cofactor activity);GO:0030274(LIM domain binding);GO:0042803(protein homodimerization activity)	Mm.327442	TC1631561	ENSMUST00000056931	1160.59	574.522	1233.93	1137.24	1110.61	410.423	709.711	603.431
AB294523	0.0318166	0.283686	2.22864	up	AB294523	N/A	N/A	Mus musculus RNA, mRNA-like noncoding RNA, partial sequence, clone: Gomafu isofom#4.	N/A	chr5	112650867	112657718							101.458	46.9858	92.0996	84.8901	127.385	32.6782	40.8064	67.4727
AF128123	0.0452611	0.320728	2.53182	up	AF128123	Aire	MGC123374,MGC123375	alt 'MGC123374#MGC123375'	11634	chr10	77492775	77506325	GO:0006350(transcription);GO:0006355(regulation of transcription, DNA-dependent);GO:0006959(humoral immune response)	GO:0005634(nucleus);GO:0005737(cytoplasm)	GO:0003677(DNA binding);GO:0005515(protein binding);GO:0008270(zinc ion binding);GO:0045182(translation regulator activity);GO:0046872(metal ion binding)	Mm.35300	NP1486141	ENSMUST00000019257	130.278	51.2119	137.122	174.707	79.004	52.4177	68.9517	32.2662
AF192383	0.00491183	0.158103	3.22457	up	AF192383	N/A	N/A	Mus musculus prion protein-like protein, chimeric mRNA, complete cds.	N/A	chr2	131735692	131781866							265.265	84.8842	244.79	306.99	244.017	81.4499	114.62	58.5827
AF212320	0.0464018	0.3235	3.0127	up	AF212320	Racgap1	AI227039,AI327394,Band25,GTPase,MgcRacGAP,gtl11,mKIAA1478	Mus musculus strain CD-1 MgcRacGAP variant alpha mRNA, complete cds.	26934	chr15	99450926	99482052	GO:0000910(cytokinesis);GO:0000915(cytokinesis, contractile ring formation);GO:0006118(electron transport);GO:0007049(cell cycle);GO:0007108(cytokinesis, initiation of separation);GO:0007165(signal transduction);GO:0007242(intracellular signaling cascade);GO:0007283(spermatogenesis);GO:0007405(neuroblast proliferation);GO:0009790(embryonic development);GO:0051301(cell division)	GO:0005622(intracellular);GO:0005634(nucleus)	GO:0005096(GTPase activator activity);GO:0005506(iron ion binding);GO:0005515(protein binding);GO:0008270(zinc ion binding);GO:0009055(electron carrier activity);GO:0019992(diacylglycerol binding);GO:0043014(alpha-tubulin binding);GO:0043015(gamma-tubulin binding);GO:0046872(metal ion binding);GO:0048487(beta-tubulin binding)	Mm.273804	TC1702403///TC1573455	ENSMUST00000023756	126.905	41.5698	99.2349	80.6259	200.855	55.603	46.2567	22.8498
AF292649	0.0100302	0.198147	2.35353	up	AF292649	Zfp202	C130037E22Rik,Znf202	Mus musculus zinc finger 202 m3 splice variant (Znf202) mRNA, complete cds.	80902	chr9	39999910	40020774	GO:0006355(regulation of transcription, DNA-dependent)	GO:0005622(intracellular);GO:0005634(nucleus)	GO:0003676(nucleic acid binding);GO:0003700(transcription factor activity);GO:0008270(zinc ion binding);GO:0046872(metal ion binding)	Mm.132196	TC1584335	ENSMUST00000026693	257.631	109.377	313.675	260.298	198.921	125.052	120.186	82.8945
AF408435	0.0167945	0.227217	3.33417	up	AF408435	Prc1	D7Ertd348e,MGC6745	Mus musculus protein regulator of cytokinesis 1-like protein mRNA, partial cds.	233406	chr7	87454278	87461086	GO:0000910(cytokinesis);GO:0007049(cell cycle);GO:0051301(cell division)	GO:0005634(nucleus);GO:0005819(spindle);GO:0005874(microtubule)		Mm.227274	TC1601601		101.1	28.5974	97.0756	149.039	57.1852	21.9973	33.5389	30.2561
AF411386	0.00266103	0.13031	2.00688	up	AF411386	Bivm	AI854267	Mus musculus basic, immunoglobulin-like variable motif-containing protein (Bivm) mRNA, complete cds.	246229	chr1	44176006	44201615	GO:0008150(biological_process)	GO:0005575(cellular_component)	GO:0003674(molecular_function)	Mm.386883	TC1579612	ENSMUST00000035991	232.988	116.854	252.832	216.117	230.016	126.17	128.439	95.9532
AJ309921	0.0121112	0.207866	2.67457	up	AJ309921	Mup10	2610016E04Rik,Mup8	Mus musculus mRNA for major urinary protein (group 1 major urinary protein gene).	100039008	chr4	60592172	60736198							109.026	40.4196	89.2359	148.507	89.3364	49.9003	29.9414	41.4171
AJ506179	0.0119121	0.206939	2.0044	up	AJ506179	Disc1	-	Mus musculus partial mRNA for disrupted in schizophrenia 1 (Disc1 gene).	244667	chr8_random	458700	560353	GO:0008150(biological_process)	GO:0005575(cellular_component);GO:0005856(cytoskeleton);GO:0005874(microtubule)	GO:0005515(protein binding)	Mm.233504	TC1591950///NP595538///TC1727875	ENSMUST00000098311///ENSMUST00000075730	32.9491	16.187	41.749	25.5538	31.5445	17.7275	14.0236	16.8099
AK002830	0.0244769	0.259409	2.44864	up	AK002830	Irf7	-	Mus musculus adult male kidney cDNA, RIKEN full-length enriched library, clone:0610039E12 product:interferon regulatory factor 7, full insert sequence.	54123	chr7	148449087	148452300	GO:0006350(transcription);GO:0006355(regulation of transcription, DNA-dependent);GO:0006955(immune response);GO:0009615(response to virus);GO:0016064(immunoglobulin mediated immune response);GO:0045351(interferon type I biosynthetic process)	GO:0005622(intracellular);GO:0005634(nucleus)	GO:0003677(DNA binding);GO:0003700(transcription factor activity);GO:0005515(protein binding)	Mm.3233	TC1772855	ENSMUST00000026571	245.129	101.411	181.607	241.342	312.438	65.438	117.937	120.858
AK004655	0.00811785	0.186739	3.73233	up	AK004655	Cep55	1200008O12Rik,2700032M20Rik	Mus musculus adult male lung cDNA, RIKEN full-length enriched library, clone:1200008O12 product:hypothetical protein, full insert sequence.	74107	chr19	38129578	38148911	GO:0007049(cell cycle);GO:0007067(mitosis);GO:0051301(cell division)			Mm.9916	TC1590265///TC1629103	ENSMUST00000096096	97.2266	25.7936	123.414	105.9	62.3654	18.9056	24.1773	34.2978
AK004893	0.00284497	0.13031	6.36755	up	AK004893	Itih4	Itih-4	Mus musculus adult male liver cDNA, RIKEN full-length enriched library, clone:1300004A21 product:inter alpha-trypsin inhibitor, heavy chain 4, full insert sequence.	16427	chr14	31699698	31715035	GO:0030212(hyaluronan metabolic process)	GO:0005737(cytoplasm);GO:0005886(plasma membrane)	GO:0004867(serine-type endopeptidase inhibitor activity);GO:0005509(calcium ion binding);GO:0005540(hyaluronic acid binding)	Mm.34819	NP358746	ENSMUST00000006703	190.991	31.8087	172.169	166.142	234.661	26.023	49.0236	20.3796
AK004981	0.0367714	0.297843	2.18738	up	AK004981	Ero1lb	1300013B24Rik,1700065B09Rik,AI447560,MGC77955,ero1-beta	Mus musculus adult male liver cDNA, RIKEN full-length enriched library, clone:1300013B24 product:ENDOPLASMIC RETICULUM OXIDOREDUCTIN 1-LBETA homolog [Homo sapiens], full insert sequence.	67475	chr13	12658149	12703663	GO:0006118(electron transport);GO:0006810(transport)	GO:0005783(endoplasmic reticulum);GO:0016020(membrane)	GO:0016491(oxidoreductase activity)	Mm.358706	TC1644269///TC1597879///TC1691347	ENSMUST00000071973	283.595	128.664	328.772	335.096	186.918	137.207	158.052	90.7336
AK005994	0.0438836	0.317935	2.33948	up	AK005994	1700015G11Rik	-	Mus musculus adult male testis cDNA, RIKEN full-length enriched library, clone:1700015G11 product:unclassifiable, full insert sequence.	75529	chr7	59267056	59271086							118.114	47.9603	84.4691	85.7286	184.145	36.8633	47.3368	59.6808
AK006011	0.0186093	0.233215	2.69568	up	AK006011	Speer4c	4933431D05Rik,SPEER-4C	Mus musculus adult male testis cDNA, RIKEN full-length enriched library, clone:1700016B04 product:4933431D05RIK PROTEIN (FRAGMENT) homolog [Mus musculus], full insert sequence.	66773	chr5	15031013	15033007							190.591	70.9597	139.145	254.26	178.368	89.909	75.5332	47.4369
AK006221	0.0278341	0.271461	2.70155	up	AK006221	Skp2	FBXL1,MGC102075,MGC116668	Mus musculus adult male testis cDNA, RIKEN full-length enriched library, clone:1700021M21 product:S-phase kinase-associated protein 2 (p45), full insert sequence.	27401	chr15	9041741	9085180	GO:0000074(regulation of progression through cell cycle);GO:0000082(G1/S transition of mitotic cell cycle);GO:0006511(ubiquitin-dependent protein catabolic process);GO:0006512(ubiquitin cycle);GO:0008634(negative regulation of survival gene product activity)	GO:0000151(ubiquitin ligase complex)	GO:0016301(kinase activity)	Mm.35584	TC1631809		107.746	43.0855	91.0258	118.725	113.486	26.9765	68.7323	33.5477
AK006321	0.00914858	0.192702	3.25831	up	AK006321	1700025B11Rik	-	Mus musculus adult male testis cDNA, RIKEN full-length enriched library, clone:1700025B11 product:unclassifiable, full insert sequence.	76409	chr15	77388671	77392292							97.6766	29.5456	79.4566	138.447	75.1262	25.3321	39.3185	23.9861
AK006653	0.0480174	0.328258	2.15799	up	AK006653	1700040F15Rik	-	Mus musculus adult male testis cDNA, RIKEN full-length enriched library, clone:1700040F15 product:weakly similar to XMR PROTEIN [Mus musculus], full insert sequence.	73329	chrY_random	7178329	7201984				Mm.293024	TC1640812		367.533	178.657	303.1	453.818	345.681	267.468	152.511	115.99
AK007638	0.043376	0.316561	3.17883	up	AK007638	Cd209f	1810029C22Rik,AI647041,SIGNR8	Mus musculus 10 day old male pancreas cDNA, RIKEN full-length enriched library, clone:1810029C22 product:weakly similar to DC-SIGN [Mus musculus], full insert sequence.	69142	chr8	4102786	4105764	GO:0008150(biological_process)	GO:0016021(integral to membrane)	GO:0005529(sugar binding);GO:0005537(mannose binding)	Mm.171061	TC1625415///TC1672378	ENSMUST00000078702	129.565	38.8551	102.736	72.1613	213.799	27.0524	31.3716	58.1414
AK007898	0.0496333	0.332106	2.95385	up	AK007898	Mfsd11	2600014M03Rik,MGC113819	Mus musculus 10 day old male pancreas cDNA, RIKEN full-length enriched library, clone:1810058M03 product:ET PUTATIVE TRANSLATION PRODUCT (FRAGMENT) homolog [Mus musculus], full insert sequence.	69900	chr11	116715075	116715570				Mm.390345	TC1602129///TC1662868	ENSMUST00000021173	212.501	76.9296	134.489	260.298	242.717	125.192	65.2196	40.3772
AK007918	0.0321263	0.285572	2.57896	up	AK007918	N/A	N/A	Mus musculus 10 day old male pancreas cDNA, RIKEN full-length enriched library, clone:1810060O09 product:immunoglobulin heavy chain 1 (serum IgG2a), full insert sequence.	N/A	chr12	114525497	114667344							119.557	46.7437	111.564	82.6368	164.47	67.3547	32.5265	40.35
AK008046	0.0105716	0.201099	2.34685	up	AK008046	Abhd5	1300003D03Rik,2010002J10Rik,CDS,CGI-58,IECN5,NCIE2	Mus musculus adult male small intestine cDNA, RIKEN full-length enriched library, clone:2010002J10 product:unclassifiable, full insert sequence.	67469	chr9	122260733	122268397	GO:0006508(proteolysis);GO:0006629(lipid metabolic process);GO:0006725(aromatic compound metabolic process)	GO:0005811(lipid particle);GO:0005829(cytosol)	GO:0004177(aminopeptidase activity);GO:0005515(protein binding);GO:0016787(hydrolase activity)	Mm.280254	TC1572699///TC1724133	ENSMUST00000035128	2210.08	927.983	2361.79	2688.33	1580.13	1076.99	941.438	765.515
AK008921	0.0138737	0.215509	2.51035	up	AK008921	2210414B05Rik	-	Mus musculus adult male stomach cDNA, RIKEN full-length enriched library, clone:2210414B05 product:unclassifiable, full insert sequence.	70143	chr4	3583659	3590255							79.8795	31.1825	82.9534	102.376	54.3092	34.8784	24.3713	34.2978
AK010593	0.00547722	0.163891	2.10362	up	AK010593	Setd8	2410195B05Rik,AA617402,AW536475,MGC117832,PR-SET7	Mus musculus ES cells cDNA, RIKEN full-length enriched library, clone:2410026F19 product:SET-domain of transcriptional regulators (TRX, EZ, ASH1 etc) containing protein, full insert sequence.	67956	chr5	124895507	124912316	GO:0016568(chromatin modification)	GO:0005634(nucleus)	GO:0008168(methyltransferase activity);GO:0016740(transferase activity);GO:0018024(histone-lysine N-methyltransferase activity)	Mm.137966	TC1676913///TC1599075///TC1574608	ENSMUST00000059580	2396.2	1160.78	2348.02	2464.42	2376.16	1001.46	1493.07	987.807
AK011748	0.0206888	0.242099	2.1595	up	AK011748	2610042L04Rik	-	Mus musculus 10 days embryo whole body cDNA, RIKEN full-length enriched library, clone:2610042L04 product:hypothetical protein, full insert sequence.	554327	chr14	4437801	4457726							237.192	112.312	279.572	232.185	199.819	75.9654	122.016	138.953
AK013972	0.0499749	0.332126	2.30709	up	AK013972	Mup11	Gm12549,OTTMUSG00000007431	Mus musculus 13 days embryo head cDNA, RIKEN full-length enriched library, clone:3110001P17 product:major urinary protein 1, full insert sequence.	100039028	chr4	60671340	60675243							103.721	48.1638	101.618	125.58	83.9666	33.5217	33.6776	77.292
AK014717	0.0118626	0.206868	2.07374	up	AK014717	Dcaf17	2810055O12Rik,4833418A01Rik,A030004A10Rik,AI448937	Mus musculus 0 day neonate head cDNA, RIKEN full-length enriched library, clone:4833418A01 product:hypothetical protein, full insert sequence.	75763	chr2	70893908	70937196				Mm.281668	TC1600999///TC1630543	ENSMUST00000102701///ENSMUST00000038143	427.295	204.003	319.009	499.684	463.193	234.608	170.88	206.52
AK015475	0.0055663	0.165076	2.15239	up	AK015475	4930405A10Rik	4930456G20Rik	Mus musculus adult male testis cDNA, RIKEN full-length enriched library, clone:4930456G20 product:unclassifiable, full insert sequence.	74896	chr14	23326395	23362045				Mm.444661			124.035	57.1584	153.96	113.278	104.866	48.6631	60.1012	62.7109
AK016837	0.0323354	0.286382	3.07719	up	AK016837	Wdr37	3110035P10Rik,4933417A01Rik,6430603N07,AI481191,mKIAA0982	Mus musculus adult male testis cDNA, RIKEN full-length enriched library, clone:4933417A01 product:unclassifiable, full insert sequence.	207615	chr13	8869586	8871351				Mm.284654	TC1580135///TC1615024///TC1601481	ENSMUST00000066405///ENSMUST00000054251	204.251	72.4056	201.231	246.283	165.239	35.2031	73.7254	108.288
AK017177	0.0467668	0.324645	3.02925	up	AK017177	5033417F24Rik	6330419D11Rik	Mus musculus 11 days pregnant adult female ovary and uterus cDNA, RIKEN full-length enriched library, clone:5033417F24 product:hypothetical protein, full insert sequence.	75995	chr1	94804956	94807266				Mm.46179	TC1648867///TC1730947		148.543	41.8536	95.8908	77.6782	272.061	38.4951	42.3821	44.6835
AK017243	0.00399267	0.146979	2.05185	up	AK017243	5430400D12Rik	-	Mus musculus 6 days neonate head cDNA, RIKEN full-length enriched library, clone:5430400D12 product:unclassifiable, full insert sequence.	71339	chr7	87065640	87067407							57.7264	27.915	48.5826	69.6139	54.9826	26.7232	25.7981	31.2238
AK017256	0.0369557	0.298363	2.04015	up	AK017256	Treml1	5430401J17Rik,TLT-1	Mus musculus 6 days neonate head cDNA, RIKEN full-length enriched library, clone:5430401J17 product:hypothetical Immunoglobulin subtype containing protein, full insert sequence.	71326	chr17	48499240	48506471	GO:0009968(negative regulation of signal transduction)	GO:0009986(cell surface);GO:0016020(membrane);GO:0016021(integral to membrane)	GO:0004872(receptor activity);GO:0005515(protein binding)	Mm.90177	NP1398768	ENSMUST00000024792	268.528	130.453	182.099	326.06	297.424	108.06	170.266	113.032
AK018014	0.0416666	0.311432	2.64506	up	AK018014	N/A	N/A	Mus musculus adult male thymus cDNA, RIKEN full-length enriched library, clone:5830455I16 product:T-cell receptor beta, joining region, full insert sequence.	N/A	chr6	41493223	41494097							75.7147	25.7541	60.6678	41.3093	125.167	25.5073	28.1371	23.618
AK018309	0.0309084	0.280601	3.25189	up	AK018309	N/A	N/A	Mus musculus 10 days neonate cerebellum cDNA, RIKEN full-length enriched library, clone:6530401G17 product:similar to HIPPOCALCIN-LIKE 1 [Mus musculus], full insert sequence.	N/A	chr12	20996319	21049194							129.895	37.4692	155.793	171.358	62.5325	48.1874	27.2504	36.9697
AK019370	0.0313416	0.282118	2.50225	up	AK019370	Extl2	3000001D04Rik,AW146439	Mus musculus 12 days embryo head cDNA, RIKEN full-length enriched library, clone:3000001D04 product:exotoses (multiple)-like 2, full insert sequence.	58193	chr3	115711249	115731790	GO:0006044(N-acetylglucosamine metabolic process);GO:0019276(UDP-N-acetylgalactosamine metabolic process)	GO:0005615(extracellular space);GO:0005783(endoplasmic reticulum);GO:0016020(membrane);GO:0016021(integral to membrane)	GO:0001888(glucuronyl-galactosyl-proteoglycan 4-alpha-N-acetylglucosaminyltransferase activity);GO:0016740(transferase activity);GO:0016757(transferase activity, transferring glycosyl groups);GO:0030145(manganese ion binding);GO:0035248(alpha-1,4-N-acetylgalactosaminyltransferase activity);GO:0046872(metal ion binding)	Mm.41739	TC1577118	ENSMUST00000029575	318.833	125.005	400.564	360.941	194.994	140.412	148.026	86.5757
AK019623	0.0101993	0.199055	3.61193	up	AK019623	4930451E10Rik	-	Mus musculus adult male testis cDNA, RIKEN full-length enriched library, clone:4930451E10 product:hypothetical Prenyl group binding site (CAAX box) containing protein, full insert sequence.	78111	chr13	55877307	55885840				Mm.243826	TC1596769		107.094	28.0468	140.529	121.213	59.5391	23.3328	29.004	31.8035
AK019906	0.0352861	0.293779	2.09575	up	AK019906	Akr1b10	2310005E10Rik	Mus musculus adult male pituitary gland cDNA, RIKEN full-length enriched library, clone:5330423M05 product:ALDOSE REDUCTASE (FRAGMENT) homolog [Pan troglodytes], full insert sequence.	67861	chr6	34334246	34346949			GO:0016491(oxidoreductase activity)	Mm.70371	TC1654623///TC1590238	ENSMUST00000038383	207.016	104.207	197.698	229.423	193.927	79.6361	156.135	76.8511
AK020043	0.0153479	0.220954	2.41195	up	AK020043	5930435M05Rik	-	Mus musculus 13 days embryo forelimb cDNA, RIKEN full-length enriched library, clone:5930435M05 product:unclassifiable, full insert sequence.	78072	chr7	90327079	90348834							145.014	61.6176	159.487	158.169	117.385	40.645	69.5031	74.7046
AK020693	0.00820606	0.18727	2.2952	up	AK020693	Acpp	A030005E02Rik,AI324033,Lap,PAP,Ppal	Mus musculus 6 days neonate skin cDNA, RIKEN full-length enriched library, clone:A030005E02 product:acid phosphatase, prostate, full insert sequence.	56318	chr9	104209003	104240052	GO:0008150(biological_process)	GO:0005615(extracellular space)	GO:0003993(acid phosphatase activity);GO:0016787(hydrolase activity)	Mm.19941	TC1634861///TC1584856///NP573620	ENSMUST00000062723	638.626	270.95	853.698	489.544	572.637	276.957	286.089	249.804
AK028367	0.0127604	0.210532	3.00102	up	AK028367	Lrrc33	E430025L02Rik,Lrcc33,MGC36838	Mus musculus 18 days pregnant adult female placenta and extra embryonic tissue cDNA, RIKEN full-length enriched library, clone:3830425I23 product:hypotetical Leucine-rich repeat, typical subtype containing protein, full insert sequence.	224109	chr16	32142910	32147967		GO:0016020(membrane);GO:0016021(integral to membrane)	GO:0005515(protein binding)	Mm.33498	TC1595628	ENSMUST00000067382	100.975	32.2415	72.009	80.5238	150.393	25.3864	36.8199	34.5183
AK029723	0.0123211	0.208776	3.39872	up	AK029723	Paqr8	1700019B16Rik,3110001D06Rik	Mus musculus adult male testis cDNA, RIKEN full-length enriched library, clone:4930510E01 product:RIKEN cDNA 1700019B16 gene, full insert sequence.	74229	chr1	20907920	20928837		GO:0016020(membrane);GO:0016021(integral to membrane)	GO:0004872(receptor activity);GO:0005496(steroid binding);GO:0008289(lipid binding)	Mm.40780	TC1602486	ENSMUST00000068880	293.305	89.183	280.019	372.943	226.954	103.517	111.928	52.1041
AK029875	0.00292353	0.132324	2.98182	up	AK029875	Gm3643	-	Mus musculus adult male testis cDNA, RIKEN full-length enriched library, clone:4931419M04 product:hypothetical protein, full insert sequence.	100042057	chr8	73550690	73650468							217.16	74.5675	205.799	236.977	208.706	53.7183	76.2313	93.753
AK031819	0.0047982	0.157772	3.44547	up	AK031819	Vcpip1	4932442A08,5730421J18Rik,5730538E15Rik,VCIP135,mKIAA1850	Mus musculus adult male medulla oblongata cDNA, RIKEN full-length enriched library, clone:6330407B02 product:hypothetical protein, full insert sequence.	70675	chr1	9710619	9714418	GO:0006512(ubiquitin cycle)	GO:0005737(cytoplasm);GO:0005783(endoplasmic reticulum)	GO:0004843(ubiquitin-specific protease activity);GO:0008233(peptidase activity);GO:0008234(cysteine-type peptidase activity);GO:0016787(hydrolase activity)	Mm.440951///Mm.274493	TC1576527///TC1619196	ENSMUST00000057438	130.928	37.9438	150.297	93.3306	149.158	40.4862	45.6957	27.6496
AK033147	1.31514e-05	0.0586483	2.35856	up	AK033147	1010001N08Rik	-	Mus musculus 15 days embryo male testis cDNA, RIKEN full-length enriched library, clone:8030446N09 product:unclassifiable, full insert sequence.	68434	chr18	11049084	11051485							745.344	316.002	765.924	759.885	710.223	330.406	306.877	310.721
AK033321	0.000978936	0.0994854	2.07158	up	AK033321	Top2a	Top-2	Mus musculus 15 days embryo male testis cDNA, RIKEN full-length enriched library, clone:8030493B08 product:topoisomerase (DNA) II alpha, full insert sequence.	21973	chr11	98854260	98871913	GO:0006259(DNA metabolic process);GO:0006265(DNA topological change);GO:0007059(chromosome segregation);GO:0030261(chromosome condensation);GO:0040016(embryonic cleavage);GO:0045944(positive regulation of transcription from RNA polymerase II promoter)	GO:0000793(condensed chromosome);GO:0005634(nucleus);GO:0005694(chromosome);GO:0005730(nucleolus)	GO:0000166(nucleotide binding);GO:0003677(DNA binding);GO:0003916(DNA topoisomerase activity);GO:0003918(DNA topoisomerase (ATP-hydrolyzing) activity);GO:0005524(ATP binding);GO:0016853(isomerase activity)	Mm.4237	TC1573332///TC1633184	ENSMUST00000103138	83.5962	40.0833	85.263	94.483	71.0425	39.566	40.9747	39.7092
AK036671	0.0113823	0.205844	3.34409	up	AK036671	E430029J22Rik	9830148g24rik	Mus musculus adult male bone cDNA, RIKEN full-length enriched library, clone:9830148G24 product:PAAD/DAPIN/Pyrin domain containing protein, full insert sequence.	100033459	chr1	175603810	175628523							194.769	58.5892	207.247	132.459	244.601	72.8029	37.9126	65.0522
AK036673	0.00137059	0.106884	2.4107	up	AK036673	Usp28	9830148O20Rik,AU022237,mKIAA1515	Mus musculus adult male bone cDNA, RIKEN full-length enriched library, clone:9830148O20 product:similar to UBIQUITIN SPECIFIC PROTEASE [Homo sapiens], full insert sequence.	235323	chr9	48824786	48850622	GO:0006511(ubiquitin-dependent protein catabolic process);GO:0006512(ubiquitin cycle)		GO:0004197(cysteine-type endopeptidase activity);GO:0004221(ubiquitin thiolesterase activity);GO:0008233(peptidase activity);GO:0008234(cysteine-type peptidase activity);GO:0016787(hydrolase activity)	Mm.21630	NP580489	ENSMUST00000047349	457.177	189.844	469.135	393.795	508.6	185.722	218.652	165.157
AK037742	0.0115478	0.206125	2.25146	up	AK037742	Slc7a11	9930009M05Rik,AI451155,sut,xCT	Mus musculus 16 days neonate thymus cDNA, RIKEN full-length enriched library, clone:A130046A05 product:solute carrier family 7 (cationic amino acid transporter, y+ system), member 11, full insert sequence.	26570	chr3	50219891	50247535	GO:0006810(transport);GO:0006865(amino acid transport)	GO:0016020(membrane);GO:0016021(integral to membrane)	GO:0015171(amino acid transporter activity);GO:0015359(amino acid permease activity)	Mm.260988	TC1608522///TC1582214	ENSMUST00000029297	1981.01	904.363	1862.02	2184.68	1896.32	628.792	1147.64	936.653
AK039322	0.0366665	0.297552	2.16524	up	AK039322	Nrcam	Bravo,C030017F07Rik,C130076O07Rik,mKIAA0343	Mus musculus adult male spinal cord cDNA, RIKEN full-length enriched library, clone:A330022O10 product:NGCAM-RELATED RELATED CELL ADHESION MOLECULE (FRAGMENT) homolog [Homo sapiens], full insert sequence.	319504	chr12	45685821	45699828	GO:0001764(neuron migration);GO:0007155(cell adhesion);GO:0007411(axon guidance);GO:0007413(axonal fasciculation);GO:0007416(synaptogenesis);GO:0007417(central nervous system development);GO:0016337(cell-cell adhesion);GO:0019227(action potential propagation);GO:0030516(regulation of axon extension);GO:0045162(clustering of voltage-gated sodium channels);GO:0045666(positive regulation of neuron d…	GO:0005615(extracellular space);GO:0005887(integral to plasma membrane);GO:0009897(external side of plasma membrane);GO:0016020(membrane);GO:0016021(integral to membrane);GO:0030424(axon)	GO:0005515(protein binding);GO:0030506(ankyrin binding)	Mm.208439	TC1585815///TC1578008///TC1586894	ENSMUST00000020939	196.484	85.722	226.699	112.885	249.868	85.532	85.8902	85.7439
AK040147	0.0206394	0.242034	2.68651	up	AK040147	Ints3	C77668	Mus musculus 0 day neonate thymus cDNA, RIKEN full-length enriched library, clone:A430070A22 product:hypothetical Glycine-rich region containing protein, full insert sequence.	229543	chr3	90211823	90237558	GO:0016180(snRNA processing)	GO:0005634(nucleus)		Mm.268564	TC1601197///TC1579583	ENSMUST00000029542	132.64	52.1938	155.069	111.098	131.752	79.645	41.6291	35.3074
AK040733	0.0363321	0.296865	4.50964	up	AK040733	9330159M07Rik	mU50hg-a	Mus musculus adult male aorta and vein cDNA, RIKEN full-length enriched library, clone:A530021L18 product:unclassifiable, full insert sequence.	319673	chr9	88736635	88753639				Mm.149040	TC1608374		185.066	46.5404	268.846	154.381	131.972	42.6327	17.6594	79.3291
AK041998	0.0333944	0.288847	2.46975	up	AK041998	N/A	N/A	Mus musculus 3 days neonate thymus cDNA, RIKEN full-length enriched library, clone:A630051J06 product:unclassifiable, full insert sequence.	N/A	chr1	40133072	40142696							88.311	35.9429	103.707	104.114	57.1118	50.6726	25.5951	31.5611
AK043023	0.0420184	0.312901	4.35468	up	AK043023	Prnd	AI450264,Dpl,PrPLP,doppel	Mus musculus 7 days neonate cerebellum cDNA, RIKEN full-length enriched library, clone:A730048L21 product:prion protein dublet, full insert sequence.	26434	chr2	131776597	131781863	GO:0006878(copper ion homeostasis)	GO:0016020(membrane)	GO:0005507(copper ion binding);GO:0048503(GPI anchor binding)	Mm.180750	TC1596329	ENSMUST00000089481	243.326	67.344	265.869	274.631	189.477	21.6836	110.3	70.0487
AK043656	0.029639	0.276605	2.40693	up	AK043656	Fgd4	9030023J02Rik,9330209B17Rik,Frabp,ZFYVE6	Mus musculus 10 days neonate cortex cDNA, RIKEN full-length enriched library, clone:A830015L23 product:weakly similar to ACTIN-BINDING PROTEIN FRABIN-GAMMA [Mus musculus], full insert sequence.	224014	chr16	16472358	16560083	GO:0007257(activation of JNK activity);GO:0030032(lamellipodium biogenesis);GO:0030035(microspike biogenesis);GO:0035023(regulation of Rho protein signal transduction)	GO:0005622(intracellular);GO:0005856(cytoskeleton);GO:0030027(lamellipodium);GO:0030175(filopodium)	GO:0003779(actin binding);GO:0005085(guanyl-nucleotide exchange factor activity);GO:0005089(Rho guanyl-nucleotide exchange factor activity);GO:0008270(zinc ion binding);GO:0046872(metal ion binding)	Mm.256131	TC1592927///TC1611971///TC1580379///TC1593173	ENSMUST00000069284///ENSMUST00000069278	313.766	123.646	391.277	371.99	178.031	141.58	119.757	109.602
AK043687	0.0103743	0.20027	2.05787	up	AK043687	Tm7sf2	3110041O18Rik,ANG1	Mus musculus 10 days neonate cortex cDNA, RIKEN full-length enriched library, clone:A830020E14 product:RIKEN cDNA 3110041O18 gene, full insert sequence.	73166	chr19	6066145	6067867	GO:0006695(cholesterol biosynthetic process);GO:0016126(sterol biosynthetic process)	GO:0005783(endoplasmic reticulum);GO:0005887(integral to plasma membrane);GO:0016020(membrane);GO:0016021(integral to membrane)	GO:0016491(oxidoreductase activity);GO:0050613(delta14-sterol reductase activity)	Mm.227361	TC1595339	ENSMUST00000025713	306.243	150.448	341.846	257.342	319.542	141.047	189.818	120.479
AK043789	0.00435051	0.152295	2.55196	up	AK043789	N/A	N/A	Mus musculus 10 days neonate cortex cDNA, RIKEN full-length enriched library, clone:A830033B12 product:ENV POLYPROTEIN PRECURSOR (COAT POLYPROTEIN) [CONTAINS: SURFACE PROTEIN; TRANSMEMBRANE PROTEIN] homolog [Mouse intracisternal a-particle], full insert sequence.	N/A	chr1	7339486	7387950							450.061	179.055	443.097	508.239	398.847	132.214	191.513	213.439
AK044223	0.0300503	0.277839	2.16766	up	AK044223	Parp3	A930002C11Rik,AW990611,Adprt3,Adprtl3,PARP-3,pADPRT-3	Mus musculus adult retina cDNA, RIKEN full-length enriched library, clone:A930002C11 product:similar to POLY [ADP-RIBOSE] POLYMERASE-3 (EC 2.4.2.30) (PARP-3) (NAD(+) ADP-RIBOSYLTRANSFERASE-3) (POLY[ADP-RIBOSE] SYNTHETASE-3) (PADPRT-3) (HPARP-3) [Homo sapiens], full insert sequence.	235587	chr9	106372683	106378982	GO:0006471(protein amino acid ADP-ribosylation)	GO:0005634(nucleus)	GO:0003950(NAD+ ADP-ribosyltransferase activity);GO:0016740(transferase activity)	Mm.273659	TC1628274///NP714658	ENSMUST00000067218	185.929	90.1478	180.38	183.596	193.81	101.776	114.673	53.9939
AK044561	0.0260836	0.264139	2.01844	up	AK044561	Man2a2	1700052O22Rik,4931438M07Rik,AI480988,MX	Mus musculus adult retina cDNA, RIKEN full-length enriched library, clone:A930022O04 product:mannosidase 2, alpha 2, full insert sequence.	140481	chr7	87499793	87508555	GO:0005975(carbohydrate metabolic process);GO:0006013(mannose metabolic process);GO:0008152(metabolic process)		GO:0004559(alpha-mannosidase activity);GO:0016787(hydrolase activity);GO:0016798(hydrolase activity, acting on glycosyl bonds)	Mm.393912///Mm.269245	TC1601386///NP828329///TC1584510///TC1656938	ENSMUST00000052096///ENSMUST00000098346	303.181	150.955	266.72	387.794	255.03	152.59	189.114	111.161
AK046659	0.0210011	0.243826	2.22309	up	AK046659	Klf3	9930027G08Rik,AL024007,Bklf,MGC151315,Tef-2	Mus musculus 4 days neonate male adipose cDNA, RIKEN full-length enriched library, clone:B430304G02 product:Kruppel-like factor 3 (basic), full insert sequence.	16599	chr5	65207159	65216045	GO:0006350(transcription);GO:0006355(regulation of transcription, DNA-dependent)	GO:0005622(intracellular);GO:0005634(nucleus)	GO:0003676(nucleic acid binding);GO:0003677(DNA binding);GO:0008270(zinc ion binding);GO:0046872(metal ion binding)	Mm.439720	TC1606085///TC1578562	ENSMUST00000031074	161.309	73.6537	188.576	171.141	124.208	73.4385	95.4989	52.0237
AK046706	0.0132349	0.211294	2.18634	up	AK046706	Rsad1	B430319G23,BC056485	Mus musculus 4 days neonate male adipose cDNA, RIKEN full-length enriched library, clone:B430319G23 product:similar to CDNA FLJ11164 FIS, CLONE PLACE1007226, WEAKLY SIMILAR TO PROBABLE OXYGEN-INDEPENDENT COPROPORPHYRINOGEN III OXIDASE (EC 1.-.-.-) [Homo sapiens], full insert sequence.	237926	chr11	94401111	94410521	GO:0006779(porphyrin biosynthetic process)	GO:0005737(cytoplasm);GO:0005739(mitochondrion)	GO:0003824(catalytic activity);GO:0004109(coproporphyrinogen oxidase activity);GO:0005506(iron ion binding);GO:0016491(oxidoreductase activity);GO:0046872(metal ion binding)	Mm.342275	TC1598810	ENSMUST00000040487	1141.97	534.043	1050.95	1307.48	1067.48	369.868	628.327	603.934
AK047199	0.0183001	0.231864	2.99431	up	AK047199	Sidt1	AW045928,B830021E24Rik	Mus musculus 10 days neonate cerebellum cDNA, RIKEN full-length enriched library, clone:B930034P18 product:unclassifiable, full insert sequence.	320007	chr16	44330508	44333109		GO:0016020(membrane);GO:0016021(integral to membrane)		Mm.242144	TC1728055///TC1579792	ENSMUST00000047446	132.631	47.1787	133.758	148.391	115.745	60.8206	25.4657	55.2498
AK047525	0.0448399	0.319613	3.24096	up	AK047525	Tcp11l1	C130096D04Rik	Mus musculus 10 days neonate cerebellum cDNA, RIKEN full-length enriched library, clone:B930083D07 product:weakly similar to CDNA FLJ11336 FIS, CLONE PLACE1010661, WEAKLY SIMILAR TO TESTIS-SPECIFIC PROTEIN PBS13 (DJ85M6.3) (SIMILAR TO TESTIS-SPECIFIC PROTEIN PBS13) [Homo sapiens], full insert sequence.	320554	chr2	104524936	104552319				Mm.249065	TC1589586///TC1606287	ENSMUST00000028597	241.729	64.2071	123.582	158.288	443.318	73.1955	68.9517	50.474
AK048700	0.0414068	0.311013	2.35452	up	AK048700	Itga2b	AI172977,CD41,CD41B,GpIIb,alphaIIb	Mus musculus 0 day neonate cerebellum cDNA, RIKEN full-length enriched library, clone:C230009P15 product:integrin alpha 2b, full insert sequence.	16399	chr11	102317785	102328513	GO:0006508(proteolysis);GO:0007155(cell adhesion);GO:0007160(cell-matrix adhesion);GO:0007229(integrin-mediated signaling pathway)	GO:0005925(focal adhesion);GO:0008305(integrin complex);GO:0009897(external side of plasma membrane);GO:0016020(membrane);GO:0016021(integral to membrane)	GO:0004182(carboxypeptidase A activity);GO:0004872(receptor activity);GO:0005509(calcium ion binding);GO:0005515(protein binding);GO:0050840(extracellular matrix binding)	Mm.26646	TC1591837	ENSMUST00000103086	86.931	37.1917	93.9794	57.298	109.516	23.9049	49.4524	38.2178
AK049558	0.0125464	0.210168	2.28181	up	AK049558	Wnt5b	AW545702,Wnt-5b	Mus musculus 7 days embryo whole body cDNA, RIKEN full-length enriched library, clone:C430039I17 product:wingless-related MMTV integration site 5B, full insert sequence.	22419	chr6	119382550	119399370	GO:0007165(signal transduction);GO:0007223(Wnt receptor signaling pathway, calcium modulating pathway);GO:0007267(cell-cell signaling);GO:0007275(multicellular organismal development);GO:0009887(organ morphogenesis);GO:0016055(Wnt receptor signaling pathway)	GO:0005576(extracellular region);GO:0005615(extracellular space)	GO:0004871(signal transducer activity);GO:0005102(receptor binding);GO:0005515(protein binding)	Mm.321818	TC1581436	ENSMUST00000032273	160.359	70.9512	161.271	128.388	191.419	88.7445	52.4818	71.6272
AK049905	0.0304775	0.278265	2.42558	up	AK049905	Prosc	1700024N20Rik,2200002F22Rik	Mus musculus adult male hippocampus cDNA, RIKEN full-length enriched library, clone:C630010F01 product:proline synthetase co-transcribed, full insert sequence.	114863	chr8	28153026	28160087		GO:0005622(intracellular)		Mm.277501	TC1765616///TC1601095///TC1605635	ENSMUST00000098851///ENSMUST00000033875	96.1822	42.2968	101.734	86.5757	100.237	60.595	24.3266	41.9687
AK049953	0.000950801	0.0994854	2.87911	up	AK049953	Dock4	5330406C03,6330411N01Rik,AF263288,C030023J22,mKIAA0716	Mus musculus adult male hippocampus cDNA, RIKEN full-length enriched library, clone:C630024B01 product:hypothetical protein, full insert sequence.	238130	chr12	41514178	41537928		GO:0016020(membrane)	GO:0005085(guanyl-nucleotide exchange factor activity)	Mm.341423	TC1600595///TC1586466///TC1608656///TC1601249///TC1601947	ENSMUST00000037488	129.49	44.6698	106.33	152.198	129.942	47.8447	39.2806	46.8841
AK051668	0.044858	0.319613	2.26661	up	AK051668	Foxp2	2810043D05Rik,AI449000,CAG-16,D0Kist7	Mus musculus 12 days embryo spinal ganglion cDNA, RIKEN full-length enriched library, clone:D130063G20 product:forkhead box P2, full insert sequence.	114142	chr6	14851348	15361938	GO:0000122(negative regulation of transcription from RNA polymerase II promoter);GO:0006350(transcription);GO:0006355(regulation of transcription, DNA-dependent);GO:0016481(negative regulation of transcription);GO:0042297(vocal learning)	GO:0005575(cellular_component);GO:0005622(intracellular);GO:0005634(nucleus)	GO:0003676(nucleic acid binding);GO:0003677(DNA binding);GO:0003700(transcription factor activity);GO:0005515(protein binding);GO:0008270(zinc ion binding);GO:0016564(transcriptional repressor activity);GO:0042803(protein homodimerization activity);GO:0046872(metal ion binding);GO:0046982(protein heterodimerization activity)	Mm.432481	TC1594978///TC1582291	ENSMUST00000031545	140.45	63.796	161.841	161.715	97.7949	95.3638	48.5874	47.4369
AK051711	0.0363457	0.296865	2.0731	up	AK051711	Zkscan17	BC040205,D130067D09,MGC36538,Nizp1,Zfp496	Mus musculus 12 days embryo spinal ganglion cDNA, RIKEN full-length enriched library, clone:D130067D09 product:hypothetical KRAB box/Zinc finger, C2H2 type containing protein, full insert sequence.	268417	chr11	59299063	59319723	GO:0000122(negative regulation of transcription from RNA polymerase II promoter);GO:0006355(regulation of transcription, DNA-dependent)	GO:0005622(intracellular);GO:0005634(nucleus)	GO:0003677(DNA binding);GO:0003700(transcription factor activity);GO:0005515(protein binding);GO:0008270(zinc ion binding);GO:0046872(metal ion binding)	Mm.239793	TC1574790	ENSMUST00000013262	266.308	124.172	328.904	303.957	166.064	108.332	147.836	116.347
AK052980	0.014513	0.217854	2.11576	up	AK052980	Ltbp2	AW208642,MGC144212	Mus musculus 15 days embryo head cDNA, RIKEN full-length enriched library, clone:D930007I24 product:latent transforming growth factor beta binding protein 2, full insert sequence.	16997	chr12	86148666	86217445	GO:0008152(metabolic process)		GO:0005509(calcium ion binding);GO:0016491(oxidoreductase activity);GO:0019838(growth factor binding)	Mm.3900	TC1582227	ENSMUST00000002073	102.592	49.6358	93.625	117.683	96.4678	37.9484	44.4955	66.4634
AK053076	0.00325455	0.13607	2.08273	up	AK053076	Als2cl	79H19D,79H19E,BC022645,D930044G19Rik,mRn.49018	Mus musculus 15 days embryo head cDNA, RIKEN full-length enriched library, clone:D930044G19 product:hypothetical MORN motif/Vacuolar sorting protein 9 (VPS9) domain containing protein, full insert sequence.	235633	chr9	110782677	110803028	GO:0007032(endosome organization and biogenesis);GO:0008104(protein localization)	GO:0016023(cytoplasmic membrane-bound vesicle)	GO:0005515(protein binding);GO:0017112(Rab guanyl-nucleotide exchange factor activity);GO:0017137(Rab GTPase binding);GO:0042802(identical protein binding)	Mm.86338	TC1578936///TC1710340	ENSMUST00000084926	1235.92	587.574	1037.56	1497.54	1172.67	597.578	626.016	539.128
AK053193	0.000774087	0.098334	2.27917	up	AK053193	E030030I06Rik	-	Mus musculus 0 day neonate lung cDNA, RIKEN full-length enriched library, clone:E030030I06 product:weakly similar to CYCLIN-DEPENDENT KINASE 6 (FRAGMENT) [Rattus norvegicus], full insert sequence.	319887	chr10	21864109	21868629	GO:0006468(protein amino acid phosphorylation)		GO:0004672(protein kinase activity);GO:0005524(ATP binding);GO:0016301(kinase activity)	Mm.177746			911.924	402.002	911.033	975.749	848.989	407.31	453.918	344.779
AK053296	0.0181551	0.231218	5.17741	up	AK053296	E130008D07Rik	-	Mus musculus 0 day neonate eyeball cDNA, RIKEN full-length enriched library, clone:E130008D07 product:unclassifiable, full insert sequence.	545207	chr17	43282989	43295240							139.72	23.7403	217.631	146.075	55.4523	20.8135	30.1974	20.2099
AK053364	0.0031306	0.134053	2.58597	up	AK053364	Lrrtm1	4632401D06Rik,AW125451	Mus musculus 0 day neonate eyeball cDNA, RIKEN full-length enriched library, clone:E130012A05 product:hypothetical Leucine-rich repeat, typical subtype containing protein, full insert sequence.	74342	chr6	77192711	77195511	GO:0008150(biological_process)	GO:0016020(membrane);GO:0016021(integral to membrane)	GO:0003674(molecular_function);GO:0005515(protein binding)	Mm.292568		ENSMUST00000020400	552.883	216.197	505.838	517	635.81	259.894	166.512	222.187
AK053993	0.00543822	0.163643	2.92226	up	AK053993	L3mbtl4	A730037L19Rik,D930040M24Rik	Mus musculus 2 days pregnant adult female oviduct cDNA, RIKEN full-length enriched library, clone:E230011E14 product:hypothetical protein, full insert sequence.	320858	chr17	69123159	69129426	GO:0045449(regulation of transcription)	GO:0005634(nucleus)		Mm.391043	TC1593160	ENSMUST00000047556	151.062	52.106	181.819	118.572	152.794	50.0837	39.4838	66.7506
AK054119	0.0206933	0.242099	2.04184	up	AK054119	Rictor	4921505C17Rik,6030405M08Rik,AVO3,AW492497,D530039E11Rik	Mus musculus 2 days pregnant adult female oviduct cDNA, RIKEN full-length enriched library, clone:E230021B08 product:hypothetical ARM repeat structure containing protein, full insert sequence.	78757	chr15	6658382	6713577				Mm.275811	TC1616483///TC1586837///TC1649352///TC1592499///TC1630521///TC1627872	ENSMUST00000061656	162.589	82.5121	170.066	149.897	167.804	63.2014	68.846	115.489
AK054333	0.00334768	0.137665	2.4738	up	AK054333	E330016L19Rik	-	Mus musculus 2 days pregnant adult female ovary cDNA, RIKEN full-length enriched library, clone:E330016L19 product:unclassifiable, full insert sequence.	414104	chrX	24561821	24611865							231.495	94.2297	209.409	213.794	271.282	93.8775	75.2588	113.553
AK054341	0.0199864	0.239347	2.76988	up	AK054341	Slc38a6	AW322671,EG625098	Mus musculus 2 days pregnant adult female ovary cDNA, RIKEN full-length enriched library, clone:E330017J12 product:transient receptor protein 7, full insert sequence.	625098	chr12	74387843	74415507							620.544	239.003	543.372	687.275	630.986	214.152	144.476	358.38
AK076622	0.00637157	0.17145	4.55488	up	AK076622	N/A	N/A	Mus musculus adult male testis cDNA, RIKEN full-length enriched library, clone:4921538P16 product:unclassifiable, full insert sequence.	N/A	chr14	7184570	7229216							207.633	46.9643	143.583	234.803	244.512	70.094	38.3344	32.4644
AK076928	0.00255014	0.129402	2.58194	up	AK076928	1700001O22Rik	1700113K14Rik,4930549G18Rik	Mus musculus adult male testis cDNA, RIKEN full-length enriched library, clone:4930558A17 product:unclassifiable, full insert sequence.	73598	chr2	30651082	30659167				Mm.34166	TC1659179///TC1731355	ENSMUST00000050003	158.343	61.188	159.352	186.213	129.463	70.3326	62.2722	50.9591
AK077713	0.00419854	0.150137	2.18172	up	AK077713	Tpm1	AA986836,AI854628,TM2,Tm3,Tmpa,Tpm-1,alpha-TM	Mus musculus 8 days embryo whole body cDNA, RIKEN full-length enriched library, clone:5730544G20 product:tropomyosin 1, alpha, full insert sequence.	22003	chr9	66875700	66897020	GO:0001701(in utero embryonic development);GO:0009790(embryonic development)	GO:0005737(cytoplasm);GO:0005856(cytoskeleton);GO:0005862(muscle thin filament tropomyosin);GO:0030016(myofibril)	GO:0003779(actin binding);GO:0005200(structural constituent of cytoskeleton)	Mm.121878	TC1641710///TC1624389///TC1575333	ENSMUST00000034928	1163.25	539.389	1276.28	1165.78	1047.68	672.817	490.653	454.698
AK079232	0.0390142	0.304386	2.36271	up	AK079232	Alox12	9930022G08Rik,Alox12p,P-12LO	Mus musculus adult male urinary bladder cDNA, RIKEN full-length enriched library, clone:9530045P09 product:arachidonate 12-lipoxygenase, full insert sequence.	11684	chr11	70062564	70068843	GO:0006118(electron transport);GO:0006691(leukotriene metabolic process);GO:0006916(anti-apoptosis);GO:0006928(cell motility);GO:0008284(positive regulation of cell proliferation);GO:0019369(arachidonic acid metabolic process);GO:0019370(leukotriene biosynthetic process);GO:0019395(fatty acid oxidation);GO:0030307(positive regulation of cell growth);GO:0042391(regulation of membrane potential);GO…	GO:0005829(cytosol);GO:0042383(sarcolemma)	GO:0004052(arachidonate 12-lipoxygenase activity);GO:0005506(iron ion binding);GO:0016165(lipoxygenase activity);GO:0016491(oxidoreductase activity);GO:0016702(oxidoreductase activity, acting on single donors with incorporation of molecular oxygen, incorporation of two atoms of oxygen);GO:0019870(potassium channel inhibitor activity);GO:0046872(metal ion binding);GO:0047977(hepoxilin-epoxide hydr…	Mm.12286	TC1613749///TC1581558	ENSMUST00000000329	99.4957	42.5895	72.2334	89.1055	137.148	33.0515	32.5973	62.1197
AK081879	0.00560017	0.165148	2.41578	up	AK081879	LOC547150	-	Mus musculus 16 days embryo head cDNA, RIKEN full-length enriched library, clone:C130084F15 product:unclassifiable, full insert sequence.	547150	chr8	19978159	19984375							521.506	216.566	576.534	571.816	416.168	243.534	238.906	167.26
AK082866	0.0473775	0.326253	2.72449	up	AK082866	C330046E03	-	Mus musculus ES cells cDNA, RIKEN full-length enriched library, clone:C330046E03 product:unclassifiable, full insert sequence.	328468	chr11	3085570	3093466							208.905	80.3375	140.415	270.742	215.557	42.2093	82.6459	116.157
AK085232	0.011703	0.206505	2.17356	up	AK085232	Atad2b	1110014E10Rik,BC032887,C79189,D530031C13Rik,KIAA1240	Mus musculus 13 days embryo stomach cDNA, RIKEN full-length enriched library, clone:D530031C13 product:hypothetical protein, full insert sequence.	320817	chr12	4924158	4961800				Mm.210966	TC1619486///TC1608659///TC1585902	ENSMUST00000045664	94.5098	43.5013	77.2105	117.641	88.6776	54.3092	40.7621	35.4325
AK085945	0.0200214	0.239433	2.49727	up	AK085945	Lama4	MGC141567	Mus musculus 16 days neonate heart cDNA, RIKEN full-length enriched library, clone:D830032F10 product:laminin, alpha 4, full insert sequence.	16775	chr10	38685646	38774325	GO:0001568(blood vessel development);GO:0007155(cell adhesion);GO:0008152(metabolic process);GO:0030155(regulation of cell adhesion);GO:0030334(regulation of cell migration);GO:0045995(regulation of embryonic development)	GO:0005578(proteinaceous extracellular matrix);GO:0005604(basement membrane);GO:0005605(basal lamina);GO:0005606(laminin-1 complex)	GO:0005102(receptor binding);GO:0005201(extracellular matrix structural constituent);GO:0005515(protein binding)	Mm.258065	TC1578515///TC1708201///TC1596549	ENSMUST00000019992	258.738	100.255	347.039	164.756	264.419	82.8196	96.5782	121.367
AK086602	0.0401998	0.307608	3.74356	up	AK086602	E130114P18Rik	-	Mus musculus 15 days embryo head cDNA, RIKEN full-length enriched library, clone:D930040E13 product:unclassifiable, full insert sequence.	319865	chr4	97234565	97251320				Mm.373807	TC1607046///TC1676183	ENSMUST00000084404	244.919	58.3488	114.491	184.63	435.635	39.3819	55.8256	79.8389
AK087115	0.0222103	0.249743	2.2335	up	AK087115	5031434C07Rik	-	Mus musculus 0 day neonate lung cDNA, RIKEN full-length enriched library, clone:E030028C01 product:hypothetical protein, full insert sequence.	319831	chr6	112236787	112240313				Mm.136719	TC1591474	ENSMUST00000053559	109.348	49.6949	90.0091	137.885	100.152	49.981	34.6061	64.4977
AK087562	0.000191286	0.0811521	2.84623	up	AK087562	LOC664787	-	Mus musculus 2 days pregnant adult female oviduct cDNA, RIKEN full-length enriched library, clone:E230002F20 product:hypothetical protein, full insert sequence.	664787	chr8_random	17590	30203							447.161	157.941	463.824	445.865	431.795	134.985	165.912	172.925
AK087573	0.00208241	0.124161	2.16844	up	AK087573	Palld	2410003B16Rik,6030492A02,MGC150248	Mus musculus 2 days pregnant adult female oviduct cDNA, RIKEN full-length enriched library, clone:E230011E21 product:similar to ACTIN-ASSOCIATED PROTEIN PALLADIN (FRAGMENT) [Mus musculus], full insert sequence.	72333	chr8	63994665	64069939	GO:0006468(protein amino acid phosphorylation);GO:0007010(cytoskeleton organization and biogenesis)	GO:0005634(nucleus);GO:0005884(actin filament)	GO:0005021(vascular endothelial growth factor receptor activity);GO:0005515(protein binding);GO:0005524(ATP binding);GO:0051371(muscle alpha-actinin binding)	Mm.29933	TC1715167///TC1578828///TC1629891	ENSMUST00000036243	938.402	429.448	762.307	1045.79	1007.1	437.516	457.039	393.788
AK088743	0.0495545	0.332106	3.0835	up	AK088743	D17H6S56E-5	G7e	Mus musculus 2 days neonate thymus thymic cells cDNA, RIKEN full-length enriched library, clone:E430024P20 product:G7e protein, full insert sequence.	110956	chr17	35134587	35137903		GO:0019028(viral capsid);GO:0019031(viral envelope)	GO:0005198(structural molecule activity)	Mm.22506	TC1573043		599.35	171.475	1083.23	382.057	332.764	182.195	208.685	123.545
AK088858	0.0492223	0.331745	3.16454	up	AK088858	Tgtp	Gtp2,Irgb6,Mg21	Mus musculus 2 days neonate thymus thymic cells cDNA, RIKEN full-length enriched library, clone:E430029D18 product:T-cell specific GTPase, full insert sequence.	21822	chr11	48871732	48877706	GO:0006955(immune response);GO:0009615(response to virus)	GO:0005575(cellular_component);GO:0005622(intracellular)	GO:0003924(GTPase activity);GO:0005525(GTP binding)	Mm.15793	TC1573312	ENSMUST00000068063///ENSMUST00000094476	427.437	155.01	381.386	452.381	448.545	212.895	192.572	59.564
AK089040	0.0139825	0.215919	4.36994	up	AK089040	March1	2900024D24Rik,BB085186	Mus musculus 2 days neonate thymus thymic cells cDNA, RIKEN full-length enriched library, clone:E430037F06 product:hypothetical RING finger containing protein, full insert sequence.	72925	chr8	68910199	68994326	GO:0006512(ubiquitin cycle)	GO:0016020(membrane);GO:0016021(integral to membrane)	GO:0005515(protein binding);GO:0008270(zinc ion binding);GO:0016874(ligase activity);GO:0046872(metal ion binding)	Mm.380457	TC1609148///TC1594534	ENSMUST00000039540	110.994	24.4236	59.7969	159.993	113.193	29.3144	15.6254	28.3309
AK089243	0.000897191	0.0994854	2.52979	up	AK089243	Naaa	2210023K21Rik,3830414F09Rik,Asahl	Mus musculus NOD-derived CD11c +ve dendritic cells cDNA, RIKEN full-length enriched library, clone:F630103D01 product:hypothetical protein, full insert sequence.	67111	chr5	92687286	92691808	GO:0008150(biological_process)	GO:0005737(cytoplasm);GO:0005764(lysosome)	GO:0003674(molecular_function);GO:0016787(hydrolase activity)	Mm.28890	TC1593928	ENSMUST00000031361	474.158	188.75	503.399	484.237	434.838	217.131	156.703	192.417
AK089366	0.00135509	0.106884	5.04	up	AK089366	Gp49a	gp49	Mus musculus B6-derived CD11 +ve dendritic cells cDNA, RIKEN full-length enriched library, clone:F730015K05 product:glycoprotein 49 A, full insert sequence.	14727	chr10	51200484	51205586							182.652	36.3153	141.945	229.772	176.24	36.7013	27.0961	45.1484
AK089775	0.00655616	0.172953	2.31627	up	AK089775	Rnf216	2810055G22Rik,AI647468,AU019462,C86502,F830018F18Rik,TRIAD3,UIP83,Ubce7ip1	Mus musculus activated spleen cDNA, RIKEN full-length enriched library, clone:F830018F18 product:ubiquitin conjugating enzyme 7 interacting protein 1, full insert sequence.	108086	chr5	143828843	143874673	GO:0006512(ubiquitin cycle);GO:0006915(apoptosis)		GO:0005515(protein binding);GO:0008270(zinc ion binding);GO:0016874(ligase activity);GO:0046872(metal ion binding)	Mm.381440	NP922322///TC1572839	ENSMUST00000053498	100.655	42.6425	72.6455	115.371	113.947	45.8652	43.8617	38.2006
AK090372	0.0207049	0.242124	2.71468	up	AK090372	Gk5	AV095337,C330018K18Rik,G630067D24Rik	Mus musculus 0 day neonate cortex cDNA, RIKEN full-length enriched library, clone:G630067D24 product:baculoviral IAP repeat-containing 1c, pseudogene 2, full insert sequence.	235533	chr9	96071334	96073882	GO:0005975(carbohydrate metabolic process);GO:0006072(glycerol-3-phosphate metabolic process)		GO:0004370(glycerol kinase activity);GO:0016301(kinase activity);GO:0016740(transferase activity)	Mm.213651	TC1597657///TC1585013	ENSMUST00000085217	303.269	109.162	201.047	426.237	282.523	118.74	130.866	77.8797
AK122252	0.0383963	0.302987	2.63705	up	AK122252	Nrcam	Bravo,C030017F07Rik,C130076O07Rik,mKIAA0343	Mus musculus mRNA for mKIAA0343 protein.	319504	chr12	45429974	45699828	GO:0001764(neuron migration);GO:0007155(cell adhesion);GO:0007411(axon guidance);GO:0007413(axonal fasciculation);GO:0007416(synaptogenesis);GO:0007417(central nervous system development);GO:0016337(cell-cell adhesion);GO:0019227(action potential propagation);GO:0030516(regulation of axon extension);GO:0045162(clustering of voltage-gated sodium channels);GO:0045666(positive regulation of neuron d…	GO:0005615(extracellular space);GO:0005887(integral to plasma membrane);GO:0009897(external side of plasma membrane);GO:0016020(membrane);GO:0016021(integral to membrane);GO:0030424(axon)	GO:0005515(protein binding);GO:0030506(ankyrin binding)	Mm.208439	TC1585815///TC1578008///TC1586894	ENSMUST00000020939	189.061	72.7914	212.572	234.708	119.904	72.1068	101.846	44.4218
AK122411	0.0211953	0.244652	2.51367	up	AK122411	Mast1	9430008B02Rik,SAST,SAST170	Mus musculus mRNA for mKIAA0973 protein.	56527	chr8	87435373	87449324	GO:0006468(protein amino acid phosphorylation);GO:0007010(cytoskeleton organization and biogenesis);GO:0007243(protein kinase cascade)	GO:0005856(cytoskeleton);GO:0016020(membrane)	GO:0000166(nucleotide binding);GO:0000287(magnesium ion binding);GO:0004672(protein kinase activity);GO:0004674(protein serine/threonine kinase activity);GO:0005515(protein binding);GO:0005524(ATP binding);GO:0016301(kinase activity);GO:0016740(transferase activity);GO:0046872(metal ion binding)	Mm.154614	TC1721648	ENSMUST00000074363	111.188	44.3435	114.175	78.0747	141.315	57.1357	30.7464	45.1484
AK131627	0.00389376	0.146457	3.59543	up	AK131627	6820431F20Rik	2610005L07Rik,2810038F24Rik,6720476A01Rik	Mus musculus adult male cerebellum cDNA, RIKEN full-length enriched library, clone:1500016I10 product:similar to Cadherin (Fragment) [Gallus gallus], full insert sequence.	381598	chr8	19981359	20020385				Mm.362165///Mm.359054///Mm.440442	TC1734159///TC1627899///TC1770362///TC1601697///TC1598794	ENSMUST00000098902///ENSMUST00000096485	143.2	39.3256	193.835	112.988	122.775	45.643	42.5335	29.8002
AK132917	0.0338428	0.289819	2.03927	up	AK132917	Gpr19	-	Mus musculus adult male testis cDNA, RIKEN full-length enriched library, clone:4930515I20 product:G protein-coupled receptor 19, full insert sequence.	14760	chr6	134819177	134847905	GO:0007165(signal transduction);GO:0007186(G-protein coupled receptor protein signaling pathway)	GO:0005887(integral to plasma membrane);GO:0016020(membrane);GO:0016021(integral to membrane)	GO:0001584(rhodopsin-like receptor activity);GO:0004871(signal transducer activity);GO:0004872(receptor activity);GO:0004930(G-protein coupled receptor activity)	Mm.4787	TC1583398	ENSMUST00000066107	113.683	55.3554	147.419	82.1838	111.448	40.5959	66.4425	59.0277
AK133408	0.00339652	0.137665	2.2179	up	AK133408	Fbxo17	Fbg4,Fbx17,Fbxo26	Mus musculus adult male testis cDNA, RIKEN full-length enriched library, clone:4933415H01 product:F-box only protein 17, full insert sequence.	50760	chr7	29501891	29523159	GO:0006512(ubiquitin cycle);GO:0030163(protein catabolic process)		GO:0005515(protein binding)	Mm.358659	TC1594442		145.345	65.0708	175.539	139.245	121.25	65.1611	57.317	72.7342
AK133814	0.00407532	0.148543	2.54976	up	AK133814	Lpgat1	AI649174,AW112037,BC013667,KIAA0205,MGC18768	Mus musculus 8 days embryo whole body cDNA, RIKEN full-length enriched library, clone:5730432B17 product:hypothetical Phospholipid/glycerol acyltransferase/Proline-rich region profile containing protein, full insert sequence.	226856	chr1	193541902	193602508	GO:0008152(metabolic process);GO:0008654(phospholipid biosynthetic process)	GO:0005575(cellular_component);GO:0005737(cytoplasm);GO:0005783(endoplasmic reticulum);GO:0016020(membrane);GO:0016021(integral to membrane)	GO:0003674(molecular_function);GO:0008415(acyltransferase activity);GO:0016740(transferase activity)	Mm.277958	TC1581499///TC1600870	ENSMUST00000027932///ENSMUST00000094180	92.0626	36.7	80.4735	101.553	94.1617	33.0263	47.4529	29.6208
AK133964	0.0392059	0.304962	2.12756	up	AK133964	Mki67	D630048A14Rik,Ki-67,Ki67	Mus musculus 8 days embryo whole body cDNA, RIKEN full-length enriched library, clone:5730578O05 product:antigen identified by monoclonal antibody Ki 67, full insert sequence.	17345	chr7	142881466	142890771	GO:0007126(meiosis);GO:0008283(cell proliferation)	GO:0000775(chromosome, pericentric region);GO:0000793(condensed chromosome);GO:0005634(nucleus);GO:0005730(nucleolus);GO:0005737(cytoplasm)		Mm.4078	TC1572202	ENSMUST00000033310	352.2	162.607	240.238	334.311	482.05	152.756	125.701	209.363
AK134408	0.00146167	0.108613	2.68182	up	AK134408	Hipk1	1110062K04Rik,Myak	Mus musculus 13 days embryo male testis cDNA, RIKEN full-length enriched library, clone:6030469F19 product:homeodomain interacting protein kinase 1, full insert sequence.	15257	chr3	103558079	103595102	GO:0000122(negative regulation of transcription from RNA polymerase II promoter);GO:0006350(transcription);GO:0006355(regulation of transcription, DNA-dependent);GO:0006468(protein amino acid phosphorylation);GO:0007224(smoothened signaling pathway);GO:0008284(positive regulation of cell proliferation);GO:0009952(anterior/posterior pattern formation);GO:0042771(DNA damage response, signal transdu…	GO:0005634(nucleus);GO:0005737(cytoplasm);GO:0016605(PML body);GO:0016607(nuclear speck)	GO:0000166(nucleotide binding);GO:0003677(DNA binding);GO:0003714(transcription corepressor activity);GO:0004672(protein kinase activity);GO:0004674(protein serine/threonine kinase activity);GO:0005515(protein binding);GO:0005524(ATP binding);GO:0016301(kinase activity);GO:0016740(transferase activity)	Mm.20827	TC1576571///TC1590035	ENSMUST00000029438	443.274	166.427	401.04	500.654	428.128	186.815	179.747	132.72
AK134493	0.0396529	0.306048	3.81444	up	AK134493	RP23-275N21.4	LOC100126590	Mus musculus 11 days embryo head cDNA, RIKEN full-length enriched library, clone:6230416J18 product:unclassifiable, full insert sequence.	100126590	chr2	177631800	177662556							183.288	54.6671	146.882	164.248	238.736	20.6264	82.0769	61.2981
AK135326	0.0277499	0.271164	2.02043	up	AK135326	Psma1	C2,alpha-type	Mus musculus 12 days embryo male wolffian duct includes surrounding region cDNA, RIKEN full-length enriched library, clone:6720479L22 product:proteasome (prosome, macropain) subunit, alpha type 1, full insert sequence.	26440	chr7	121414002	121419630	GO:0006511(ubiquitin-dependent protein catabolic process);GO:0006810(transport)	GO:0005829(cytosol);GO:0005839(proteasome core complex (sensu Eukaryota));GO:0016020(membrane);GO:0043234(protein complex)	GO:0004175(endopeptidase activity);GO:0004298(threonine endopeptidase activity);GO:0005215(transporter activity);GO:0008233(peptidase activity);GO:0016787(hydrolase activity)	Mm.121265	TC1669464		17139.8	8873.35	17772.8	16960	16686.6	6891.76	6895.53	12832.8
AK135766	0.0232665	0.254271	4.47477	up	AK135766	N/A	N/A	Mus musculus in vitro fertilized eggs cDNA, RIKEN full-length enriched library, clone:7420413N03 product:unclassifiable, full insert sequence.	N/A	chr11	82879253	82884748							254.38	54.9508	408.053	131.685	223.402	34.7921	45.5839	84.4764
AK136683	0.0214456	0.246211	2.059	up	AK136683	Gm1110	-	Mus musculus adult male epididymis cDNA, RIKEN full-length enriched library, clone:9230022M14 product:hypothetical Glycoside hydrolase, family 35/Galactose-binding like containing protein, full insert sequence.	382064	chr9	26687151	26705927							128.094	64.2034	112.322	131.203	140.756	89.3191	54.2429	49.0482
AK136856	0.00331387	0.137656	2.75307	up	AK136856	Tiam1	AI847750,D16Ium10,D16Ium10e	Mus musculus adult male diencephalon cDNA, RIKEN full-length enriched library, clone:9330153L18 product:T-cell lymphoma invasion and metastasis 1, full insert sequence.	21844	chr16	89787356	89818597	GO:0007165(signal transduction);GO:0007242(intracellular signaling cascade);GO:0007264(small GTPase mediated signal transduction);GO:0035023(regulation of Rho protein signal transduction);GO:0048013(ephrin receptor signaling pathway);GO:0050772(positive regulation of axonogenesis)	GO:0005622(intracellular);GO:0005886(plasma membrane)	GO:0005057(receptor signaling protein activity);GO:0005085(guanyl-nucleotide exchange factor activity);GO:0005089(Rho guanyl-nucleotide exchange factor activity);GO:0005515(protein binding);GO:0005543(phospholipid binding);GO:0046875(ephrin receptor binding)	Mm.124100	TC1576020	ENSMUST00000002588	2892.69	1074.7	3157.27	2828.65	2692.16	945.9	1420.91	857.291
AK137124	0.00291039	0.132324	4.45221	up	AK137124	Cyp26b1	CP26,P450RAI-2	Mus musculus 12 days embryo embryonic body between diaphragm region and neck cDNA, RIKEN full-length enriched library, clone:9430091K14 product:cytochrome P450, family 26, subfamily b, polypeptide 1, full insert sequence.	232174	chr6	84521937	84538632	GO:0006118(electron transport);GO:0009954(proximal/distal pattern formation);GO:0030326(embryonic limb morphogenesis);GO:0042573(retinoic acid metabolic process);GO:0048384(retinoic acid receptor signaling pathway)	GO:0005783(endoplasmic reticulum);GO:0005792(microsome);GO:0016020(membrane)	GO:0004497(monooxygenase activity);GO:0005506(iron ion binding);GO:0016491(oxidoreductase activity);GO:0020037(heme binding);GO:0046872(metal ion binding)	Mm.255246	TC1583864	ENSMUST00000089589	746.311	175.705	800.434	721.21	717.289	230.581	188.698	107.836
AK137593	0.00886009	0.191038	2.24839	up	AK137593	AB124611	Gm1706	Mus musculus adult male bone cDNA, RIKEN full-length enriched library, clone:9830162J08 product:hypothetical Immunoglobulin-like containing protein, full insert sequence.	382062	chr9	21330720	21349237							117.867	52.3869	129.722	133.188	90.6912	46.1821	45.7942	65.1845
AK137657	0.0226343	0.25168	2.12037	up	AK137657	Mapkapk5	MK5,PRAK	Mus musculus adult female vagina cDNA, RIKEN full-length enriched library, clone:9930013M24 product:MAP kinase-activated protein kinase 5, full insert sequence.	17165	chr5	121968621	121995901	GO:0006468(protein amino acid phosphorylation)	GO:0005634(nucleus);GO:0005737(cytoplasm)	GO:0000166(nucleotide binding);GO:0004672(protein kinase activity);GO:0004674(protein serine/threonine kinase activity);GO:0005515(protein binding);GO:0005524(ATP binding);GO:0016301(kinase activity);GO:0016740(transferase activity)	Mm.272206	TC1579551///TC1602872	ENSMUST00000031410	172.299	83.066	206.994	151.835	158.066	55.7423	99.4764	93.9794
AK138622	0.0404186	0.308734	2.52264	up	AK138622	Hisppd1	AW555814,D330021B20,Vip2,mKIAA0433	Mus musculus adult male spinal cord cDNA, RIKEN full-length enriched library, clone:A330077P05 product:similar to KIAA0377 splice variant 3 [Homo sapiens], full insert sequence.	227399	chr1	99609516	99666669			GO:0003993(acid phosphatase activity)	Mm.220817	TC1577204	ENSMUST00000042509	148.222	62.5329	170.067	111.897	162.702	54.2094	96.5323	36.857
AK139522	0.00225016	0.125352	3.82278	up	AK139522	N/A	N/A	Mus musculus 2 cells egg cDNA, RIKEN full-length enriched library, clone:B020002P18 product:unclassifiable, full insert sequence.	N/A	chr3	129158179	129159048							3295.75	896.468	3283.68	3283.01	3320.57	1265.16	686.823	737.424
AK139719	0.00077573	0.098334	3.42068	up	AK139719	Tulp4	1110057P05Rik,2210038L17Rik,Tusp	Mus musculus 2 cells egg cDNA, RIKEN full-length enriched library, clone:B020013H04 product:tubby like protein 4, full insert sequence.	68842	chr17	6495982	6514626	GO:0007242(intracellular signaling cascade);GO:0008150(biological_process)	GO:0005737(cytoplasm)	GO:0003674(molecular_function)	Mm.28251	TC1698161///TC1573015	ENSMUST00000039655	1466.51	430.984	1262.03	1667.33	1470.17	395.216	371.941	525.793
AK139772	0.00224772	0.125352	3.41367	up	AK139772	N/A	N/A	Mus musculus 2 cells egg cDNA, RIKEN full-length enriched library, clone:B020016B05 product:unclassifiable, full insert sequence.	N/A	chr5	101898966	101900156							2964.83	861.219	3694.22	2271.59	2928.68	986.223	905.96	691.474
AK139882	0.000419271	0.089091	5.06067	up	AK139882	E330016L19Rik	-	Mus musculus 2 cells egg cDNA, RIKEN full-length enriched library, clone:B020031N16 product:unclassifiable, full insert sequence.	414104	chrX	26962428	26997133							292.562	57.4136	318.349	333.616	225.72	67.7005	52.1398	52.4005
AK140485	0.0152439	0.220513	2.08487	up	AK140485	Epb4.1l4a	Epb4.1l4,NBL4	Mus musculus 10 days neonate cerebellum cDNA, RIKEN full-length enriched library, clone:B930009L11 product:erythrocyte protein band 4.1-like 4a, full insert sequence.	13824	chr18	33984112	34166197		GO:0005737(cytoplasm);GO:0005856(cytoskeleton);GO:0016020(membrane)	GO:0005198(structural molecule activity);GO:0005488(binding);GO:0008092(cytoskeletal protein binding)	Mm.3465	TC1610814///TC1601604	ENSMUST00000025234	290.946	143.657	298.673	272.52	301.646	152.858	179.212	98.9008
AK140562	0.00818465	0.187192	2.18362	up	AK140562	BC017647	MGC28990	Mus musculus 10 days neonate cerebellum cDNA, RIKEN full-length enriched library, clone:B930029K22 product:hypothetical Glutamine-rich region profile containing protein, full insert sequence.	216971	chr11	77908191	77970262				Mm.119387	TC1590063///TC1604051///TC1579831	ENSMUST00000073705	217.067	102.042	214.882	214.395	221.923	79.1202	135.228	91.7768
AK140772	0.0256146	0.262832	2.1402	up	AK140772	BC025920	-	Mus musculus 16 days embryo head cDNA, RIKEN full-length enriched library, clone:C130014B16 product:weakly similar to Zinc finger protein 126 (HZF-2) (Fragment) [Homo sapiens], full insert sequence.	268319	chr10	81069052	81072580							105.095	50.4912	102.39	123.472	89.4238	32.8336	61.8771	56.763
AK141824	0.00950343	0.195429	2.35909	up	AK141824	Dhx9	AI326842,Ddx9,MGC90954,NDHII,RHA	Mus musculus 12 days embryo spinal ganglion cDNA, RIKEN full-length enriched library, clone:D130013C23 product:DEAH (Asp-Glu-Ala-His) box polypeptide 9, full insert sequence.	13211	chr1	155311469	155334790		GO:0005622(intracellular);GO:0005634(nucleus);GO:0005730(nucleolus)	GO:0000166(nucleotide binding);GO:0003676(nucleic acid binding);GO:0003677(DNA binding);GO:0003723(RNA binding);GO:0003724(RNA helicase activity);GO:0003725(double-stranded RNA binding);GO:0004386(helicase activity);GO:0005524(ATP binding);GO:0008026(ATP-dependent helicase activity);GO:0016787(hydrolase activity)	Mm.20000	TC1622599///TC1581281	ENSMUST00000042141	74.0794	30.8621	59.8992	98.8375	63.5014	36.0048	30.5412	26.0404
AK142316	0.000522	0.0894624	2.17841	up	AK142316	Trp53i11	Tp53i11	Mus musculus 13 days embryo heart cDNA, RIKEN full-length enriched library, clone:D330045A08 product:tumor protein p53 inducible protein 11, full insert sequence.	277414	chr2	93027740	93041914				Mm.41033	TC1749745	ENSMUST00000090554	430.247	197.497	473.374	424.344	393.024	177.513	212.927	202.05
AK143663	0.0189596	0.234539	2.99984	up	AK143663	Cytsb	2810012G08Rik,B230396K10Rik,KIAA4061,Specc1,mKIAA4061	Mus musculus 6 days neonate spleen cDNA, RIKEN full-length enriched library, clone:F430007D01 product:Similar to sperm antigen (Fragment) homolog [Mus musculus], full insert sequence.	432572	chr11	61770264	61932953	GO:0008150(biological_process)	GO:0005634(nucleus)	GO:0003674(molecular_function)	Mm.37803	TC1653800///TC1598630	ENSMUST00000049836	110.986	36.3686	123.526	141.855	67.5758	25.6659	47.3368	36.1031
AK143826	0.0023331	0.125352	2.85907	up	AK143826	S100a9	60B8Ag,AW546964,BEE22,Cagb,GAGB,L1Ag,MRP14,p14	Mus musculus 6 days neonate spleen cDNA, RIKEN full-length enriched library, clone:F430201H11 product:S100 calcium binding protein A9 (calgranulin B), full insert sequence.	20202	chr3	90496554	90499613	GO:0030595(leukocyte chemotaxis);GO:0031532(actin cytoskeleton reorganization);GO:0045113(regulation of integrin biosynthetic process)		GO:0005509(calcium ion binding)	Mm.2128	TC1578387	ENSMUST00000069960	470.488	160.992	353.853	461.408	596.204	156.939	157.062	168.976
AK143924	0.000363806	0.089091	3.97317	up	AK143924	Gm10845	ENSMUSG00000075496	Mus musculus adult male kidney cDNA, RIKEN full-length enriched library, clone:F520015A14 product:hypothetical protein, full insert sequence.	100038734	chr14	80260327	80268983							9471.21	2349.09	7364.38	11140.8	9908.48	2344.62	2326.26	2376.39
AK145433	0.00239053	0.126629	2.02232	up	AK145433	N/A	N/A	Mus musculus cDNA, RIKEN full-length enriched library, clone:I0C0044D01 product:unclassifiable, full insert sequence.	N/A	chr12	97888278	97889851							3280.59	1608.39	3700.91	3462.51	2678.35	1592.08	1534.48	1698.6
AK146558	0.0237459	0.256633	2.91267	up	AK146558	S100g	AU042539,CABP1,CaBP-D9K,Cabp9k,Calb3	Mus musculus 17 days embryo kidney cDNA, RIKEN full-length enriched library, clone:I920026J24 product:calbindin 3, (vitamin D-dependent calcium binding protein), full insert sequence.	12309	chrX	159399923	159402531		GO:0016323(basolateral plasma membrane);GO:0016324(apical plasma membrane)	GO:0005499(vitamin D binding);GO:0005509(calcium ion binding)	Mm.6891	TC1580034	ENSMUST00000038769	123.52	42.6761	111.714	173.646	85.2013	31.1722	34.3023	62.5537
AK147392	0.000336622	0.089091	2.60081	up	AK147392	Tiam1	AI847750,D16Ium10,D16Ium10e	Mus musculus cDNA, RIKEN full-length enriched library, clone:M5C1028H05 product:T-cell lymphoma invasion and metastasis 1, full insert sequence.	21844	chr16	89787356	89974944	GO:0007165(signal transduction);GO:0007242(intracellular signaling cascade);GO:0007264(small GTPase mediated signal transduction);GO:0035023(regulation of Rho protein signal transduction);GO:0048013(ephrin receptor signaling pathway);GO:0050772(positive regulation of axonogenesis)	GO:0005622(intracellular);GO:0005886(plasma membrane)	GO:0005057(receptor signaling protein activity);GO:0005085(guanyl-nucleotide exchange factor activity);GO:0005089(Rho guanyl-nucleotide exchange factor activity);GO:0005515(protein binding);GO:0005543(phospholipid binding);GO:0046875(ephrin receptor binding)	Mm.124100	TC1576020	ENSMUST00000002588	1688.83	649.033	1643.93	1534.87	1887.69	577.023	693.158	676.918
AK148087	0.00228778	0.125352	2.09085	up	AK148087	Gabpa	GABPalpha	Mus musculus B16 F10Y cells cDNA, RIKEN full-length enriched library, clone:G370013H10 product:GA repeat binding protein, alpha, full insert sequence.	14390	chr16	84835368	84864021	GO:0006350(transcription);GO:0006355(regulation of transcription, DNA-dependent);GO:0006357(regulation of transcription from RNA polymerase II promoter)	GO:0005634(nucleus)	GO:0003677(DNA binding);GO:0003700(transcription factor activity);GO:0005515(protein binding)	Mm.18974	TC1629082///TC1645314///TC1598601	ENSMUST00000009120	306.741	145.429	249.774	349.869	320.579	140.768	140.014	155.505
AK148490	0.00966191	0.196147	2.21626	up	AK148490	Fhad1	2900090M10Rik,B230311F11	Mus musculus adult pancreas islet cells cDNA, RIKEN full-length enriched library, clone:C820009N20 product:hypothetical protein, full insert sequence.	329977	chr4	141472203	141489004				Mm.252019///Mm.387697	TC1596590///TC1588097///NP353388	ENSMUST00000051924///ENSMUST00000036701	94.0125	42.5648	104.493	103.915	73.629	34.9637	53.379	39.3518
AK153639	0.0142981	0.216983	2.79829	up	AK153639	N/A	N/A	Mus musculus 3 days neonate thymus cDNA, RIKEN full-length enriched library, clone:A630029C19 product:unclassifiable, full insert sequence.	N/A	chr10	21984048	22022641							62.5216	22.6469	75.0105	68.0261	44.5283	31.8407	18.4177	17.6822
AK154127	0.0127853	0.210649	2.2821	up	AK154127	Pim1	Pim-1	Mus musculus NOD-derived CD11c +ve dendritic cells cDNA, RIKEN full-length enriched library, clone:F630003I04 product:proviral integration site 1, full insert sequence.	18712	chr17	29630031	29632404	GO:0006468(protein amino acid phosphorylation);GO:0008283(cell proliferation);GO:0043066(negative regulation of apoptosis)	GO:0005634(nucleus);GO:0005737(cytoplasm)	GO:0000166(nucleotide binding);GO:0004672(protein kinase activity);GO:0004674(protein serine/threonine kinase activity);GO:0005515(protein binding);GO:0005524(ATP binding);GO:0016301(kinase activity);GO:0016740(transferase activity);GO:0030145(manganese ion binding);GO:0046872(metal ion binding)	Mm.405293///Mm.328931	TC1621945	ENSMUST00000024811	1007.03	437.239	817.86	1325.07	878.15	434.299	528.676	348.743
AK155970	0.0120069	0.207289	2.68718	up	AK155970	Sh3bp2	3BP2	Mus musculus activated spleen cDNA, RIKEN full-length enriched library, clone:F830002K05 product:SH3-domain binding protein 2, full insert sequence.	24055	chr5	34886013	34906275	GO:0007242(intracellular signaling cascade)			Mm.5012	TC1577452	ENSMUST00000067638	117.749	44.5996	127.677	135.352	90.218	54.6545	49.3611	29.7832
AK156138	0.00709452	0.176951	2.09578	up	AK156138	Mfsd2b	Gm1964	Mus musculus activated spleen cDNA, RIKEN full-length enriched library, clone:F830008P21 product:hypothetical protein, full insert sequence.	432628	chr12	4869245	4881161							123.603	58.9493	136.567	98.9539	135.288	71.1434	51.5589	54.1457
AK156902	0.00679047	0.174233	2.14803	up	AK156902	N/A	N/A	Mus musculus activated spleen cDNA, RIKEN full-length enriched library, clone:F830106H21 product:unclassifiable, full insert sequence.	N/A	chr1_random	1019851	1033745							121.308	55.3077	141.136	88.3768	134.412	54.7666	55.0855	56.0709
AK157632	0.00847284	0.189843	3.7032	up	AK157632	N/A	N/A	Mus musculus activated spleen cDNA, RIKEN full-length enriched library, clone:F830228J04 product:weakly similar to Hypothetical Sp100 domain containing protein [Mus musculus], full insert sequence.	N/A	chr1	85177038	85257589							134.748	33.6545	94.9209	95.1706	214.151	32.988	34.6061	33.3693
AK158151	0.025182	0.262459	2.49356	up	AK158151	Gm1604b	ENSMUSG00000073470,Gm1604	Mus musculus adult inner ear cDNA, RIKEN full-length enriched library, clone:F930035N09 product:hypothetical protein, full insert sequence.	381059	chr17	7283606	7286452							107.609	41.5897	123.26	64.2607	135.306	47.9453	44.2226	32.6012
AK158155	0.00794017	0.184456	2.45559	up	AK158155	Fkbp8	38kDa,Fkbp38	Mus musculus adult inner ear cDNA, RIKEN full-length enriched library, clone:F930036D08 product:FK506 binding protein 8, full insert sequence.	14232	chr8	73051649	73056009	GO:0001708(cell fate specification);GO:0006457(protein folding);GO:0006915(apoptosis);GO:0007224(smoothened signaling pathway);GO:0009953(dorsal/ventral pattern formation);GO:0043010(camera-type eye development)	GO:0005739(mitochondrion);GO:0005740(mitochondrial envelope);GO:0016020(membrane);GO:0016021(integral to membrane);GO:0030176(integral to endoplasmic reticulum membrane)	GO:0003755(peptidyl-prolyl cis-trans isomerase activity);GO:0005488(binding);GO:0005509(calcium ion binding);GO:0016853(isomerase activity)	Mm.141864	TC1573294	ENSMUST00000075491	351.921	144.688	422.646	345.27	287.845	127.449	188.588	118.027
AK158671	0.0027866	0.13031	2.10418	up	AK158671	Cep164	AI450905,BC027092,D030051D21,KIAA1052,MGC38792,mKIAA1052	Mus musculus visual cortex cDNA, RIKEN full-length enriched library, clone:K230049M01 product:hypothetical protein, full insert sequence.	214552	chr9	45617786	45636722				Mm.260103	TC1581546///TC1593974///TC1616013	ENSMUST00000084234	119.166	56.8678	113.984	108.42	135.094	67.7005	52.016	50.8869
AK161148	0.00457877	0.155724	5.66419	up	AK161148	Zc3h7a	A430104C18Rik,AI447294,AW556219,HSPC055,Zc3h7,Zc3hdc7	Mus musculus 10 days neonate skin cDNA, RIKEN full-length enriched library, clone:4732481K02 product:Hypothetical TPR repeat containing protein (Fragment) homolog [Mus musculus], full insert sequence.	106205	chr16	11155928	11162770		GO:0005622(intracellular)	GO:0003676(nucleic acid binding);GO:0008270(zinc ion binding)	Mm.226860	TC1574079///TC1611245	ENSMUST00000037633	275.724	47.527	206.378	415.436	205.358	53.4032	31.4015	57.7762
AK161316	0.0141286	0.216479	2.04949	up	AK161316	Sec61a2	-	Mus musculus adult male testis cDNA, RIKEN full-length enriched library, clone:4930402A17 product:Sec61, alpha subunit 2 (S. cerevisiae), full insert sequence.	57743	chr2	5803821	5816399	GO:0006605(protein targeting);GO:0006810(transport);GO:0009306(protein secretion);GO:0015031(protein transport)	GO:0005783(endoplasmic reticulum);GO:0016020(membrane);GO:0016021(integral to membrane)	GO:0015450(protein translocase activity)	Mm.21435	TC1591132	ENSMUST00000102981	129.75	63.5162	128.181	156.269	104.801	50.5547	61.2767	78.7171
AK161717	0.00597731	0.168321	2.00762	up	AK161717	Ifi203	-	Mus musculus adult male thymus cDNA, RIKEN full-length enriched library, clone:5830408K10 product:Interferon-activatable protein 205 (IFI-205) (D3 protein) homolog [Mus musculus], full insert sequence.	15950	chr1	175787351	175798891	GO:0006955(immune response)	GO:0005634(nucleus)		Mm.261270	TC1604266///TC1575934		288.808	141.915	286.913	351.066	228.445	149.567	145.563	130.614
AK162138	0.0369115	0.298324	3.14024	up	AK162138	N/A	N/A	Mus musculus in vitro fertilized eggs cDNA, RIKEN full-length enriched library, clone:7420434N23 product:unclassifiable, full insert sequence.	N/A	chr3	31184508	31215813							117.977	38.9816	116.972	74.5937	162.366	60.1972	35.0868	21.6607
AK163331	0.0261058	0.264178	2.27658	up	AK163331	N/A	N/A	Mus musculus 2 cells egg cDNA, RIKEN full-length enriched library, clone:B020015C01 product:unclassifiable, full insert sequence.	N/A	chrUn_random	3830795	3837247							60.8058	26.008	43.4078	52.9417	86.0679	32.731	23.4906	21.8025
AK163333	0.00637009	0.17145	2.66398	up	AK163333	LOC100041034	-	Mus musculus 2 cells egg cDNA, RIKEN full-length enriched library, clone:B020015G01 product:unclassifiable, full insert sequence.	100041034	chr1	85175358	85272632							331.266	122.973	433.813	296.08	263.906	127.343	98.2	143.378
AK163341	0.00939349	0.194335	4.32104	up	AK163341	C130026I21Rik	4930565N07Rik,OTTMUSG00000029174	Mus musculus 2 cells egg cDNA, RIKEN full-length enriched library, clone:B020016L04 product:hypothetical Sp100 containing protein, full insert sequence.	620078	chr1_random	864449	893579		GO:0005634(nucleus)	GO:0003677(DNA binding)	Mm.441193	TC1592629		474.523	118.58	401.594	505.876	516.099	126.957	167.771	61.0133
AK163784	0.0399908	0.306916	2.15666	up	AK163784	Poli	Rad30b	Mus musculus 16 days embryo head cDNA, RIKEN full-length enriched library, clone:C130023P21 product:polymerase (DNA directed), iota, full insert sequence.	26447	chr18	70682355	70689975	GO:0006260(DNA replication);GO:0006281(DNA repair);GO:0006974(response to DNA damage stimulus)	GO:0005622(intracellular);GO:0005634(nucleus)	GO:0000287(magnesium ion binding);GO:0003677(DNA binding);GO:0003887(DNA-directed DNA polymerase activity);GO:0016740(transferase activity);GO:0016779(nucleotidyltransferase activity);GO:0046872(metal ion binding)	Mm.244352	TC1601735	ENSMUST00000043286	255.756	121.204	295.747	283.328	188.195	138.252	149.091	76.2686
AK163870	0.0474829	0.32655	2.45327	up	AK163870	N/A	N/A	Mus musculus 16 days embryo head cDNA, RIKEN full-length enriched library, clone:C130098H10 product:hypothetical protein, full insert sequence.	N/A	chr10	93464543	93498493							60.5506	22.4889	57.2708	93.0287	31.3522	23.7192	20.6501	23.0973
AK164938	0.0092718	0.193931	2.22432	up	AK164938	AI451617	-	Mus musculus 0 day neonate lung cDNA, RIKEN full-length enriched library, clone:E030033P18 product:similar to Tripartite motif protein 30 (Down regulatory protein of interleukin 2 receptor) [Mus musculus], full insert sequence.	209387	chr7	111620362	111656339		GO:0005622(intracellular)	GO:0004872(receptor activity);GO:0005515(protein binding);GO:0008270(zinc ion binding);GO:0046872(metal ion binding)	Mm.277377	TC1647943///TC1590898	ENSMUST00000033211	192.071	87.9931	209.817	165.749	200.646	82.5143	114.145	67.3198
AK165031	0.0182172	0.231553	2.11135	up	AK165031	Ccdc52	D16Ertd480e	Mus musculus 0 day neonate eyeball cDNA, RIKEN full-length enriched library, clone:E130309J01 product:hypothetical protein, full insert sequence.	212514	chr16	44347569	44370491				Mm.446962///Mm.24035	TC1622283///TC1580221///TC1591034	ENSMUST00000050897	118.126	54.4171	96.9601	94.2614	163.156	56.3969	46.7062	60.1481
AK165065	0.034949	0.292648	2.82454	up	AK165065	Igtp	AW558444,Irgm3,MGC102455,MGC5712	Mus musculus 2 days pregnant adult female oviduct cDNA, RIKEN full-length enriched library, clone:E230029N02 product:interferon gamma induced GTPase, full insert sequence.	16145	chr11	58013057	58021077		GO:0005829(cytosol)	GO:0003924(GTPase activity)	Mm.440768	TC1577058	ENSMUST00000035266	231.02	85.1527	278.737	259.276	155.047	123.769	83.6761	48.0134
AK165897	0.0492583	0.331745	3.02956	up	AK165897	Racgap1	AI227039,AI327394,Band25,GTPase,MgcRacGAP,gtl11,mKIAA1478	Mus musculus lung RCB-0558 LLC cDNA, RIKEN full-length enriched library, clone:G730015N23 product:Rac GTPase-activating protein 1, full insert sequence.	26934	chr15	99450926	99482052	GO:0000910(cytokinesis);GO:0000915(cytokinesis, contractile ring formation);GO:0006118(electron transport);GO:0007049(cell cycle);GO:0007108(cytokinesis, initiation of separation);GO:0007165(signal transduction);GO:0007242(intracellular signaling cascade);GO:0007283(spermatogenesis);GO:0007405(neuroblast proliferation);GO:0009790(embryonic development);GO:0051301(cell division)	GO:0005622(intracellular);GO:0005634(nucleus)	GO:0005096(GTPase activator activity);GO:0005506(iron ion binding);GO:0005515(protein binding);GO:0008270(zinc ion binding);GO:0009055(electron carrier activity);GO:0019992(diacylglycerol binding);GO:0043014(alpha-tubulin binding);GO:0043015(gamma-tubulin binding);GO:0046872(metal ion binding);GO:0048487(beta-tubulin binding)	Mm.273804	TC1702403///TC1573455	ENSMUST00000023756	202.226	63.7766	229.704	96.3575	280.616	59.7028	90.1042	41.5228
AK166824	0.000977655	0.0994854	4.14447	up	AK166824	N/A	N/A	Mus musculus blastocyst blastocyst cDNA, RIKEN full-length enriched library, clone:I1C0015H22 product:hypothetical protein, full insert sequence.	N/A	chr8	19913963	19916871							375.643	90.0855	418.113	423.571	285.246	73.7738	103.93	92.5523
AK166883	0.00084185	0.0994854	2.12554	up	AK166883	Fgd4	9030023J02Rik,9330209B17Rik,Frabp,ZFYVE6	Mus musculus blastocyst blastocyst cDNA, RIKEN full-length enriched library, clone:I1C0020F21 product:hypothetical protein, full insert sequence.	224014	chr16	16487207	16600438	GO:0007257(activation of JNK activity);GO:0030032(lamellipodium biogenesis);GO:0030035(microspike biogenesis);GO:0035023(regulation of Rho protein signal transduction)	GO:0005622(intracellular);GO:0005856(cytoskeleton);GO:0030027(lamellipodium);GO:0030175(filopodium)	GO:0003779(actin binding);GO:0005085(guanyl-nucleotide exchange factor activity);GO:0005089(Rho guanyl-nucleotide exchange factor activity);GO:0008270(zinc ion binding);GO:0046872(metal ion binding)	Mm.256131	TC1592927///TC1611971///TC1580379///TC1593173	ENSMUST00000069284///ENSMUST00000069278	18204.8	8528.07	20659.1	18035.3	15920.1	9165.19	8227.07	8191.95
AK167468	0.014466	0.217854	3.21806	up	AK167468	Hk1	BB404130,Hk-1,Hk1-s,dea,mHk1-s	Mus musculus 14 days pregnant adult female placenta cDNA, RIKEN full-length enriched library, clone:I530016C13 product:hexokinase 1, full insert sequence.	15275	chr10	61732609	61803106	GO:0006096(glycolysis)	GO:0005739(mitochondrion);GO:0005829(cytosol);GO:0016020(membrane)	GO:0000166(nucleotide binding);GO:0003824(catalytic activity);GO:0004396(hexokinase activity);GO:0005524(ATP binding);GO:0016301(kinase activity);GO:0016740(transferase activity)	Mm.196605	NP051575///TC1591776///TC1686155///TC1615139	ENSMUST00000072357///ENSMUST00000020274	1276.45	411.643	1079.11	1657.22	1093.01	577.455	409.347	248.128
AK169076	0.0436937	0.317569	2.99603	up	AK169076	Rsu1	rsp-1	Mus musculus 16 days embryo heart cDNA, RIKEN full-length enriched library, clone:I920078P22 product:Ras suppressor protein 1, full insert sequence.	20163	chr2	13137628	13192905	GO:0007265(Ras protein signal transduction)	GO:0005575(cellular_component)	GO:0003674(molecular_function);GO:0005515(protein binding)	Mm.905	TC1769560	ENSMUST00000028059	89.896	26.9039	56.2134	55.1768	158.298	21.3833	34.7783	24.55
AK169467	0.0270652	0.268654	2.92479	up	AK169467	Zufsp	2700019D07Rik,MGC107205	Mus musculus 3 days neonate thymus cDNA, RIKEN full-length enriched library, clone:A630028J23 product:zinc finger protein 353, full insert sequence.	72580	chr10	33646741	33649814		GO:0005622(intracellular)	GO:0003676(nucleic acid binding);GO:0008270(zinc ion binding);GO:0046872(metal ion binding)	Mm.248081	TC1593032///TC1667582	ENSMUST00000048222	92.2063	29.1216	150.513	67.6877	58.4182	23.4119	34.5183	29.4347
AK169819	0.0456575	0.322015	2.13086	up	AK169819	Ints10	4921521J11Rik,AI462004	Mus musculus 2 days neonate thymus thymic cells cDNA, RIKEN full-length enriched library, clone:E430027M17 product:Hypothetical tetratricopeptide repeat homolog [Mus musculus], full insert sequence.	70885	chr8	71317852	71322470		GO:0005634(nucleus)		Mm.252421	TC1595091///TC1576199	ENSMUST00000034328	192.49	95.7776	181.233	173.866	222.372	59.564	142.364	85.4052
AK170368	0.00130335	0.106884	4.46507	up	AK170368	Lilrb4	CD85K,Gp49b,HM18,ILT3,LIR-5,gp49	Mus musculus NOD-derived CD11c +ve dendritic cells cDNA, RIKEN full-length enriched library, clone:F630101G01 product:glycoprotein 49 B, full insert sequence.	14728	chr10	51210775	51216417	GO:0006955(immune response)	GO:0016020(membrane);GO:0016021(integral to membrane)	GO:0004872(receptor activity)	Mm.34408	TC1572053	ENSMUST00000078778	151.357	33.4373	200.599	128.439	125.033	38.0655	35.3629	26.8835
AK171070	0.034127	0.290622	2.07925	up	AK171070	Ubox5	1500010O06Rik,C330018L13Rik,Rnf37,UIP5,Ubce7ip5,Ube7ip5	Mus musculus NOD-derived CD11c +ve dendritic cells cDNA, RIKEN full-length enriched library, clone:F630222D24 product:RING finger protein 37 (Ubiquitin conjugating enzyme 7 interacting protein 5) (UbcM4-interacting protein 5), full insert sequence.	140629	chr2	130415737	130455722	GO:0006512(ubiquitin cycle);GO:0016567(protein ubiquitination)	GO:0000151(ubiquitin ligase complex);GO:0005634(nucleus)	GO:0004842(ubiquitin-protein ligase activity);GO:0005515(protein binding);GO:0008270(zinc ion binding);GO:0046872(metal ion binding)	Mm.441191	TC1579863	ENSMUST00000028761	316.457	157.16	285.448	378.535	285.389	98.7923	186.676	186.011
AK171828	0.0282826	0.272351	3.11301	up	AK171828	Batf2	4933430F08Rik	Mus musculus activated spleen cDNA, RIKEN full-length enriched library, clone:F830013F11 product:hypothetical Basic-leucine zipper (bZIP) transcription factor/Eukaryotic transcription factor, DNA-binding containing protein, full insert sequence.	74481	chr19	6164457	6172471	GO:0006355(regulation of transcription, DNA-dependent)	GO:0005634(nucleus)	GO:0003677(DNA binding);GO:0003700(transcription factor activity);GO:0046983(protein dimerization activity)	Mm.159219	TC1587944	ENSMUST00000045042	131.238	45.9027	140.25	99.5412	153.923	34.1068	27.411	76.1903
AK172128	0.0299259	0.277368	3.09025	up	AK172128	Gm1966	-	Mus musculus activated spleen cDNA, RIKEN full-length enriched library, clone:F830043H18 product:hypothetical protein, full insert sequence.	434223	chr7	113744756	113788159	GO:0008152(metabolic process)		GO:0016740(transferase activity)	Mm.334112	TC1590001///TC1710885		69.6186	23.3327	98.1451	56.8634	53.8473	24.9552	12.5637	32.4791
AK172304	0.0399257	0.306912	2.16769	up	AK172304	Cep68	6030463E10Rik,AI481761,BC027174,Kiaa0582,MGC6990	Mus musculus activated spleen cDNA, RIKEN full-length enriched library, clone:F830117I23 product:hypothetical protein, full insert sequence.	216543	chr11	20141525	20149427				Mm.260314	TC1579257	ENSMUST00000050611	135.56	64.2336	119.368	173.339	113.971	72.8568	80.2425	39.6016
AK173087	0.0476123	0.32681	2.03277	up	AK173087	Mtmr15	6030441H18Rik	Mus musculus mRNA for mKIAA1018 protein.	330554	chr7	71506377	71518640				Mm.236510	TC1591459	ENSMUST00000037476	144.664	73.4631	127.997	180.282	125.712	95.0547	45.5223	79.8122
AK180276	0.0284846	0.272585	2.15447	up	AK180276	1110038D17Rik	-	Mus musculus cDNA, clone:Y0G0113J03, strand:plus, reference:ENSEMBL:Mouse-Transcript-ENST:ENSMUST00000039796, based on BLAT search.	68778	chr10	74972440	74974031				Mm.29382	TC1581132///TC1737860///TC1680645///TC1729038	ENSMUST00000039796	252.378	119.172	283.852	284.952	188.331	92.5523	165.548	99.4146
AK182869	0.0163961	0.226544	2.26723	up	AK182869	2410127L17Rik	-	Mus musculus cDNA, clone:Y0G0124A01, strand:plus, reference:ENSEMBL:Mouse-Transcript-ENST:ENSMUST00000055999, based on BLAT search.	67383	chr19	18745818	18752373				Mm.306602	TC1579572	ENSMUST00000025632	131.106	60.0485	132.34	136.601	124.379	38.4951	68.7323	72.9182
AK184777	0.0124638	0.209313	2.20468	up	AK184777	N/A	N/A	Mus musculus cDNA, clone:Y0G0131H17, strand:plus, reference:ENSEMBL:Mouse-Transcript-ENST:ENSMUST00000033141, based on BLAT search.	N/A	chr7	137789756	137860353							372.64	166.721	351.802	481.715	284.402	137.495	168.262	194.407
AK199184	0.0476093	0.32681	2.21795	up	AK199184	N/A	N/A	Mus musculus cDNA, clone:Y1G0130G18, strand:unspecified.	N/A	chr13	108791715	108791854							3003.64	1259.94	1624.48	4169.37	3217.06	1203.87	1290.27	1285.67
AK199756	0.000860626	0.0994854	2.18039	up	AK199756	N/A	N/A	Mus musculus cDNA, clone:Y1G0132E18, strand:plus, reference:ENSEMBL:Mouse-Transcript-ENST:ENSMUST00000069407, based on BLAT search.	N/A	chr11	120624277	120624410							3771.61	1741.21	3593.39	3833.83	3887.6	1605.47	1575.45	2042.72
AK217780	0.0176393	0.229506	2.33855	up	AK217780	Gak	D130045N16Rik,MGC31204	Mus musculus cDNA, clone:Y2G0142P13, strand:plus, reference:ENSEMBL:Mouse-Transcript-ENST:ENSMUST00000046603, based on BLAT search.	231580	chr5	109011688	109020786	GO:0006468(protein amino acid phosphorylation);GO:0007049(cell cycle)	GO:0005634(nucleus)	GO:0000166(nucleotide binding);GO:0004672(protein kinase activity);GO:0004674(protein serine/threonine kinase activity);GO:0005515(protein binding);GO:0005524(ATP binding);GO:0016301(kinase activity);GO:0016740(transferase activity);GO:0031072(heat shock protein binding)	Mm.276647	TC1775274	ENSMUST00000046603	610.923	268.432	578.008	524.936	729.826	181.01	354.292	269.994
AY303784	0.0294119	0.27599	2.20196	up	AY303784	H2-Ab1	AI845868,Abeta,H-2Ab,H2-Ab,I-A<b>,I-Abeta,IAb,Ia-2,Ia2,Rmcs1	Mus musculus strain C57BL/Ka MHC class II antigen A beta (H2-Ab) mRNA, partial cds.	14961	chr17	34401698	34404562	GO:0006955(immune response);GO:0019882(antigen processing and presentation);GO:0019886(antigen processing and presentation of exogenous peptide antigen via MHC class II);GO:0048002(antigen processing and presentation of peptide antigen)	GO:0005622(intracellular);GO:0005769(early endosome);GO:0005771(multivesicular body);GO:0005794(Golgi apparatus);GO:0005886(plasma membrane);GO:0009897(external side of plasma membrane);GO:0016020(membrane);GO:0016021(integral to membrane);GO:0042613(MHC class II protein complex)	GO:0005515(protein binding);GO:0042605(peptide antigen binding)	Mm.254067	TC1772338///TC1695052///TC1572070///TC1712831	ENSMUST00000040828	487	232.791	482.957	500.139	477.905	288.506	272.172	137.694
AY968049	0.00179243	0.117089	2.81114	up	AY968049	Dclk2	6330415M09Rik,AU044875,Click-II,Dcamkl2	Mus musculus CLICK-II alpha mRNA, complete cds.	70762	chr3	86590072	86724803	GO:0006468(protein amino acid phosphorylation);GO:0007242(intracellular signaling cascade);GO:0007275(multicellular organismal development);GO:0030154(cell differentiation)		GO:0000166(nucleotide binding);GO:0004672(protein kinase activity);GO:0004674(protein serine/threonine kinase activity);GO:0005524(ATP binding);GO:0016301(kinase activity);GO:0016740(transferase activity)	Mm.439996	NP740718	ENSMUST00000029719	160.548	57.6085	167.016	176.076	138.551	45.0796	67.2188	60.5271
BC001986	0.00664353	0.173518	2.07673	up	BC001986	Ifi47	47kDa,IRG-47,Iigp4,Iipg4,Irgd,Olfr56	Mus musculus interferon gamma inducible protein 47, mRNA (cDNA clone MGC:5665 IMAGE:3589815), complete cds.	15953	chr11	48900551	48910473	GO:0006952(defense response)	GO:0005783(endoplasmic reticulum)		Mm.24769	TC1576386	ENSMUST00000046704	241.086	115.194	263.846	187.484	271.927	106.097	133.27	106.216
BC002082	0.00135941	0.106884	2.34782	up	BC002082	Fabp3	Fabph-1,Fabph-4,Fabph1,Fabph4,H-FABP,Mdgi	Mus musculus fatty acid binding protein 3, muscle and heart, mRNA (cDNA clone MGC:6249 IMAGE:3485639), complete cds.	14077	chr4	129985991	129992703	GO:0006656(phosphatidylcholine biosynthetic process);GO:0006810(transport)		GO:0005488(binding);GO:0008289(lipid binding)	Mm.388886	TC1737364	ENSMUST00000070532	237.6	100.828	216.767	280.504	215.528	113.826	95.6436	93.0136
BC004704	0.0262818	0.265164	2.78687	up	BC004704	Mbp	C76307,Hmbpr,R75289,golli-mbp,mld,shi	Mus musculus myelin basic protein, mRNA (cDNA clone MGC:6184 IMAGE:3499588), complete cds.	17196	chr18	82723937	82755029	GO:0042552(myelination)	GO:0043209(myelin sheath)	GO:0005198(structural molecule activity);GO:0019911(structural constituent of myelin sheath)	Mm.252063	TC1602734///NP059096///NP050985	ENSMUST00000047865///ENSMUST00000102812///ENSMUST00000091789	106.008	35.69	111.272	57.5944	149.158	34.5815	30.1974	42.291
BC006601	0.0103059	0.200079	2.41853	up	BC006601	Slc35e3	9330166G04Rik,AI481200	Mus musculus solute carrier family 35, member E3, mRNA (cDNA clone MGC:11712 IMAGE:3965585), complete cds.	215436	chr10	117172405	117183421				Mm.256753	TC1580252	ENSMUST00000079041	509.824	214.026	453.667	624.336	451.468	172.488	286.986	182.603
BC006770	0.00116114	0.106311	3.13167	up	BC006770	N/A	N/A	Mus musculus LOC434536, mRNA (cDNA clone MGC:8099 IMAGE:3588650), complete cds.	N/A	chr14	53313518	53733552							4199.13	1343.55	3927.47	4975.04	3694.87	1518.7	1428.34	1083.61
BC006933	0.00411855	0.149068	2.28019	up	BC006933	Cdca7l	BC006933,JPO2,MGC11998	Mus musculus cell division cycle associated 7 like, mRNA (cDNA clone MGC:11998 IMAGE:3602150), complete cds.	217946	chr12	119082333	119117179	GO:0006350(transcription);GO:0006355(regulation of transcription, DNA-dependent);GO:0008284(positive regulation of cell proliferation)	GO:0005634(nucleus)	GO:0005515(protein binding)	Mm.281149	TC1738792	ENSMUST00000021592	547.871	241.388	458.158	595.57	589.884	279.134	252.062	192.967
BC007165	0.001137	0.106311	4.27065	up	BC007165	Zfp605	A830023I12Rik,MGC7438	Mus musculus RIKEN cDNA A830023I12 gene, mRNA (cDNA clone MGC:7438 IMAGE:3489445), complete cds.	675812	chr5	110540943	110561034							465.892	108.185	400.35	600.903	396.423	86.2893	120.904	117.36
BC007193	0.0139906	0.215919	5.44313	up	BC007193	C130026I21Rik	4930565N07Rik,OTTMUSG00000029174	Mus musculus RIKEN cDNA C130026I21 gene, mRNA (cDNA clone MGC:8305 IMAGE:3593825), complete cds.	620078	chr1	84986881	85266725		GO:0005634(nucleus)	GO:0003677(DNA binding)	Mm.441193	TC1592629		159.214	32.4367	153.245	211.681	112.716	56.5277	16.5561	24.2263
BC008168	0.00104326	0.101882	2.11893	up	BC008168	H2-Ab1	AI845868,Abeta,H-2Ab,H2-Ab,I-A<b>,I-Abeta,IAb,Ia-2,Ia2,Rmcs1	Mus musculus histocompatibility 2, class II antigen A, beta 1, mRNA (cDNA clone MGC:6182 IMAGE:3257494), complete cds.	14961	chr17	34400185	34406355	GO:0006955(immune response);GO:0019882(antigen processing and presentation);GO:0019886(antigen processing and presentation of exogenous peptide antigen via MHC class II);GO:0048002(antigen processing and presentation of peptide antigen)	GO:0005622(intracellular);GO:0005769(early endosome);GO:0005771(multivesicular body);GO:0005794(Golgi apparatus);GO:0005886(plasma membrane);GO:0009897(external side of plasma membrane);GO:0016020(membrane);GO:0016021(integral to membrane);GO:0042613(MHC class II protein complex)	GO:0005515(protein binding);GO:0042605(peptide antigen binding)	Mm.254067	TC1772338///TC1695052///TC1572070///TC1712831	ENSMUST00000040828	425.967	201.773	408.29	464.321	405.29	215.962	172.23	217.127
BC008626	0.0105612	0.201099	2.02815	up	BC008626	Icam1	CD54,Icam-1,Ly-47,MALA-2,MGC6195	Mus musculus intercellular adhesion molecule, mRNA (cDNA clone MGC:6195 IMAGE:3588949), complete cds.	15894	chr9	20820448	20833258	GO:0007155(cell adhesion);GO:0016337(cell-cell adhesion);GO:0030155(regulation of cell adhesion)	GO:0009897(external side of plasma membrane);GO:0016020(membrane);GO:0016021(integral to membrane)	GO:0005515(protein binding)	Mm.435508	TC1571893	ENSMUST00000086399	149.819	73.7581	176.586	153.327	119.544	74.0365	87.013	60.2248
BC008989	0.000318581	0.089091	2.94146	up	BC008989	Nr1d1	A530070C09Rik,R75201	Mus musculus nuclear receptor subfamily 1, group D, member 1, mRNA (cDNA clone MGC:6402 IMAGE:3585478), complete cds.	217166	chr11	98629245	98636136	GO:0006350(transcription);GO:0006355(regulation of transcription, DNA-dependent);GO:0007623(circadian rhythm)	GO:0005634(nucleus)	GO:0003677(DNA binding);GO:0003700(transcription factor activity);GO:0004872(receptor activity);GO:0008270(zinc ion binding);GO:0046872(metal ion binding)	Mm.390397	TC1579611///TC1601718///TC1696370	ENSMUST00000064941	4650.95	1590.46	4308.72	4775.28	4868.85	1564	1838.21	1369.16
BC010666	0.000678696	0.0953124	2.21732	up	BC010666	Fut8	-	Mus musculus fucosyltransferase 8, mRNA (cDNA clone MGC:11418 IMAGE:3594582), complete cds.	53618	chr12	78339111	78576954	GO:0007179(transforming growth factor beta receptor signaling pathway);GO:0007229(integrin-mediated signaling pathway);GO:0007585(respiratory gaseous exchange);GO:0016477(cell migration);GO:0043112(receptor metabolic process)	GO:0005615(extracellular space);GO:0016020(membrane);GO:0016021(integral to membrane)	GO:0008424(glycoprotein 6-alpha-L-fucosyltransferase activity);GO:0016740(transferase activity);GO:0016757(transferase activity, transferring glycosyl groups);GO:0046921(alpha(1,6)-fucosyltransferase activity)	Mm.35628	TC1572721	ENSMUST00000021463	3048.03	1381.39	3128.5	3166.52	2849.06	1304.76	1596.52	1242.89
BC011437	0.0457459	0.322139	2.22122	up	BC011437	Il1b	IL-1beta,Il-1b	Mus musculus interleukin 1 beta, mRNA (cDNA clone MGC:18555 IMAGE:3989461), complete cds.	16176	chr2	129190315	129196856	GO:0000074(regulation of progression through cell cycle);GO:0001660(fever);GO:0006954(inflammatory response);GO:0006955(immune response);GO:0008283(cell proliferation);GO:0030593(neutrophil chemotaxis);GO:0043123(positive regulation of I-kappaB kinase/NF-kappaB cascade);GO:0045080(positive regulation of chemokine biosynthetic process);GO:0045410(positive regulation of interleukin-6 biosynthetic p…	GO:0005576(extracellular region);GO:0005615(extracellular space)	GO:0005125(cytokine activity);GO:0005149(interleukin-1 receptor binding);GO:0005515(protein binding);GO:0008083(growth factor activity)	Mm.222830	TC1585020	ENSMUST00000028881	114.08	54.005	90.3519	124.306	127.582	54.6545	75.7994	31.5611
BC012243	0.00653638	0.172761	2.59153	up	BC012243	Klk1b21	Klk21,mGk-21	Mus musculus kallikrein 1-related peptidase b21, mRNA (cDNA clone MGC:19031 IMAGE:4167772), complete cds.	16616	chr7	51357727	51361953	GO:0006508(proteolysis)	GO:0005615(extracellular space)	GO:0004252(serine-type endopeptidase activity);GO:0004293(tissue kallikrein activity);GO:0008233(peptidase activity);GO:0016787(hydrolase activity)	Mm.443292	TC1589038	ENSMUST00000085455	177.457	68.6621	178.309	139.554	214.506	67.4534	85.1179	53.415
BC012259	0.000641241	0.094791	6.56592	up	BC012259	Mup2	AA589603,MGC117823,Mup-2,Mup4	Mus musculus major urinary protein 2, mRNA (cDNA clone MGC:18535 IMAGE:4196403), complete cds.	17841	chr4	60148804	60434817							154.229	22.9782	191.174	106.55	164.964	26.928	21.5524	20.4542
BC012280	0.039575	0.305813	2.0094	up	BC012280	Cenpa	Cenp-A	Mus musculus centromere protein A, mRNA (cDNA clone IMAGE:3662678), with apparent retained intron.	12615	chr5	30969274	30977199	GO:0006334(nucleosome assembly);GO:0007001(chromosome organization and biogenesis (sensu Eukaryota))	GO:0000775(chromosome, pericentric region);GO:0000786(nucleosome);GO:0000939(inner kinetochore of condensed chromosome);GO:0005634(nucleus);GO:0005694(chromosome)	GO:0003677(DNA binding)	Mm.290563	TC1602183///TC1572956	ENSMUST00000031073	87.4383	45.107	99.084	73.6357	89.5951	48.2261	58.5704	28.5245
BC012658	0.0499072	0.332126	2.66334	up	BC012658	Ccl22	ABCD-1,DCBCK,MDC,Scya22	Mus musculus chemokine (C-C motif) ligand 22, mRNA (cDNA clone MGC:13812 IMAGE:4192393), complete cds.	20299	chr8	97269596	97275293	GO:0006935(chemotaxis);GO:0006954(inflammatory response);GO:0006955(immune response);GO:0007165(signal transduction)	GO:0005576(extracellular region);GO:0005615(extracellular space)	GO:0005125(cytokine activity);GO:0008009(chemokine activity)	Mm.12895	TC1578765	ENSMUST00000034231	89.3839	33.2583	68.5705	60.801	138.78	22.9475	50.2873	26.54
BC012724	0.037121	0.298747	2.10044	up	BC012724	Igfbp2	AI255832,Igfbp-2	Mus musculus insulin-like growth factor binding protein 2, mRNA (cDNA clone MGC:14074 IMAGE:2654907), complete cds.	16008	chr1	72871076	72899045	GO:0001558(regulation of cell growth)	GO:0005576(extracellular region);GO:0005615(extracellular space)	GO:0005520(insulin-like growth factor binding);GO:0019838(growth factor binding)	Mm.141936	NP744202	ENSMUST00000047328	244.687	114.504	179.015	342.149	212.897	149.179	94.2231	100.11
BC013556	0.0101352	0.198697	2.13428	up	BC013556	Pigr	-	Mus musculus polymeric immunoglobulin receptor, mRNA (cDNA clone MGC:5797 IMAGE:3601095), complete cds.	18703	chr1	132723327	132752796		GO:0016020(membrane);GO:0016021(integral to membrane)	GO:0004872(receptor activity)	Mm.276414	TC1576673	ENSMUST00000027675	2814.57	1352.31	2909.92	2811.55	2722.25	1479.59	1623.84	953.492
BC013651	0.000492461	0.089091	6.7936	up	BC013651	Serpina3n	Spi2-2,Spi2.2,Spi2/eb.4	Mus musculus serine (or cysteine) peptidase inhibitor, clade A, member 3N, mRNA (cDNA clone MGC:18516 IMAGE:4160649), complete cds.	20716	chr12	105644938	105652539	GO:0006953(acute-phase response);GO:0008150(biological_process)	GO:0005615(extracellular space)	GO:0004866(endopeptidase inhibitor activity);GO:0004867(serine-type endopeptidase inhibitor activity)	Mm.22650	TC1580665	ENSMUST00000021506	245.187	37.2832	261.424	226.889	247.247	29.3743	51.6419	30.8334
BC013785	0.0165836	0.226544	2.40883	up	BC013785	Psmb8	Lmp-7,Lmp7	Mus musculus proteasome (prosome, macropain) subunit, beta type 8 (large multifunctional peptidase 7), mRNA (cDNA clone MGC:6535 IMAGE:2654130), complete cds.	16913	chr17	34335315	34338391	GO:0006511(ubiquitin-dependent protein catabolic process);GO:0006955(immune response);GO:0019882(antigen processing and presentation)	GO:0005634(nucleus);GO:0005829(cytosol);GO:0005839(proteasome core complex (sensu Eukaryota));GO:0043234(protein complex)	GO:0004175(endopeptidase activity);GO:0004298(threonine endopeptidase activity);GO:0008233(peptidase activity);GO:0016787(hydrolase activity)	Mm.180191	TC1574225	ENSMUST00000025196	416.067	179.008	476.158	393.129	378.913	202.269	113.278	221.477
BC014690	0.00629408	0.170918	3.24164	up	BC014690	Tgfb3	MGC118722,Tgfb-3	Mus musculus transforming growth factor, beta 3, mRNA (cDNA clone MGC:18512 IMAGE:3663150), complete cds.	21809	chr12	87397749	87419270	GO:0000074(regulation of progression through cell cycle);GO:0001701(in utero embryonic development);GO:0008283(cell proliferation);GO:0008285(negative regulation of cell proliferation);GO:0009790(embryonic development);GO:0009887(organ morphogenesis);GO:0016049(cell growth);GO:0040007(growth)	GO:0005615(extracellular space)	GO:0005160(transforming growth factor beta receptor binding);GO:0008083(growth factor activity)	Mm.3992	TC1575978	ENSMUST00000003687	764.075	227.831	634.868	1091.37	565.986	236.653	259.054	187.787
BC014731	0.0149783	0.218996	2.27034	up	BC014731	Parp16	BC055447,C79952,MGC65335	Mus musculus poly (ADP-ribose) polymerase family, member 16, mRNA (cDNA clone IMAGE:4486878), partial cds.	214424	chr9	65062953	65087024	GO:0006471(protein amino acid ADP-ribosylation)	GO:0005634(nucleus);GO:0016020(membrane);GO:0016021(integral to membrane)	GO:0003950(NAD+ ADP-ribosyltransferase activity);GO:0016740(transferase activity);GO:0016757(transferase activity, transferring glycosyl groups)	Mm.31129	TC1581334	ENSMUST00000093828	202.365	88.452	226.072	144.347	236.677	74.36	111.128	79.8684
BC016222	0.00137827	0.106884	3.45475	up	BC016222	544988	-	Mus musculus cDNA clone IMAGE:4486605.	544988	chr14	5188217	5189679				Mm.443041	TC1635280	ENSMUST00000081725	155.214	45.5357	137.122	175.922	152.597	47.5659	34.2622	54.7791
BC016500	0.0167358	0.226875	2.56167	up	BC016500	Itih4	Itih-4	Mus musculus inter alpha-trypsin inhibitor, heavy chain 4, mRNA (cDNA clone MGC:25281 IMAGE:4211735), complete cds.	16427	chr14	31699698	31715032	GO:0030212(hyaluronan metabolic process)	GO:0005737(cytoplasm);GO:0005886(plasma membrane)	GO:0004867(serine-type endopeptidase inhibitor activity);GO:0005509(calcium ion binding);GO:0005540(hyaluronic acid binding)	Mm.34819	NP358746	ENSMUST00000006703	204.958	76.2143	132.459	292.864	189.552	71.8395	86.0104	70.7931
BC016636	0.00944439	0.194502	2.69167	up	BC016636	Prr3	4930540G07Rik,Cat56	Mus musculus proline-rich polypeptide 3, mRNA (cDNA clone MGC:6855 IMAGE:2650633), complete cds.	75210	chr17	36109485	36115916			GO:0003676(nucleic acid binding);GO:0008270(zinc ion binding);GO:0046872(metal ion binding)	Mm.40036	TC1577901	ENSMUST00000055454	340.027	126.163	275.236	296.542	448.303	165.484	108.643	104.362
BC018236	0.0165358	0.226544	2.92334	up	BC018236	Alad	Lv	Mus musculus aminolevulinate, delta-, dehydratase, mRNA (cDNA clone MGC:18970 IMAGE:3992605), complete cds.	17025	chr4	62170201	62180915	GO:0006779(porphyrin biosynthetic process);GO:0006783(heme biosynthetic process);GO:0008152(metabolic process)		GO:0003824(catalytic activity);GO:0004655(porphobilinogen synthase activity);GO:0008270(zinc ion binding);GO:0016829(lyase activity);GO:0042802(identical protein binding);GO:0046872(metal ion binding)	Mm.6988	TC1586559	ENSMUST00000030090	1154.21	402.997	1189.56	1433.91	839.158	481.106	479.55	248.336
BC018257	0.00026253	0.089091	3.3949	up	BC018257	Hspb1	27kDa,Hsp25	Mus musculus heat shock protein 1, mRNA (cDNA clone MGC:6141 IMAGE:3498180), complete cds.	15507	chr5	136363848	136365432		GO:0005625(soluble fraction);GO:0005626(insoluble fraction);GO:0005634(nucleus);GO:0005737(cytoplasm);GO:0005886(plasma membrane);GO:0030018(Z disc);GO:0043292(contractile fiber)		Mm.439650	NP046743	ENSMUST00000007996///ENSMUST00000005077	3666.08	1072.11	3101.68	3615.35	4281.22	1006.47	1062.64	1147.22
BC018277	0.0414509	0.311013	3.12124	up	BC018277	C4b	C4,Ss	Mus musculus complement component 4B (Childo blood group), mRNA (cDNA clone IMAGE:3500524), with apparent retained intron.	12268	chr17	34865331	34865988	GO:0006956(complement activation);GO:0016064(immunoglobulin mediated immune response)			Mm.439678	NP1220374	ENSMUST00000069507	198.943	68.1219	135.201	204.366	257.261	74.0365	98.1646	32.1646
BC018310	0.0176012	0.229126	2.36086	up	BC018310	A630066F11Rik	-	Mus musculus RIKEN cDNA A630066F11 gene, mRNA (cDNA clone IMAGE:3582285), with apparent retained intron.	320642	chr10	7383179	7384160							221.151	93.9163	195.342	178.804	289.306	66.2188	111.832	103.698
BC018323	0.0053186	0.163348	2.2109	up	BC018323	Dbp	-	Mus musculus D site albumin promoter binding protein, mRNA (cDNA clone MGC:18803 IMAGE:4195116), complete cds.	13170	chr7	52960653	52965395	GO:0006350(transcription);GO:0006355(regulation of transcription, DNA-dependent);GO:0007623(circadian rhythm);GO:0048511(rhythmic process)	GO:0005634(nucleus)	GO:0003677(DNA binding);GO:0003700(transcription factor activity);GO:0046983(protein dimerization activity)	Mm.378235	TC1606762	ENSMUST00000080885	3031.36	1352.65	2288.83	3338.36	3466.9	1354.22	1484.15	1219.59
BC018455	0.0315094	0.282254	3.23415	up	BC018455	Igh	MGC102661,MGC102662,MGC103226,MGC118125,MGC28019,MGC36307,MGC6486,MGC6522,MGC6529,MGC6628,MGC6740,MGC68276,MGC68378	Mus musculus immunoglobulin heavy chain complex, mRNA (cDNA clone MGC:28036 IMAGE:3666682), complete cds.	111507	chr12	114496930	116048097				Mm.390473///Mm.342177///Mm.430747	TC1707890///NP1489570///TC1586115///NP1216021///NP048004///NP590647	ENSMUST00000103412///ENSMUST00000103505///ENSMUST00000103452///ENSMUST00000103504///ENSMUST00000103501	143.075	42.9574	75.2584	190.551	163.416	26.7797	46.7062	55.3862
BC019195	0.0409832	0.310306	2.9253	up	BC019195	Gbp3	AW228655,Gbp4	Mus musculus guanylate nucleotide binding protein 3, mRNA (cDNA clone MGC:29218 IMAGE:5036920), complete cds.	55932	chr3	142223015	142228407	GO:0006955(immune response)	GO:0005829(cytosol)	GO:0000166(nucleotide binding);GO:0003924(GTPase activity);GO:0005525(GTP binding)	Mm.439718	TC1580322	ENSMUST00000029935	164.595	63.8643	172.042	145.892	175.85	109.683	49.3084	32.6012
BC020061	0.00586188	0.167254	2.06007	up	BC020061	Gmnn	AW546347,Gem	Mus musculus geminin, mRNA (cDNA clone MGC:28184 IMAGE:3988065), complete cds.	57441	chr13	24843713	24853732	GO:0000074(regulation of progression through cell cycle);GO:0007049(cell cycle);GO:0008156(negative regulation of DNA replication);GO:0009887(organ morphogenesis);GO:0045786(negative regulation of progression through cell cycle)	GO:0005634(nucleus)	GO:0005515(protein binding)	Mm.12239	TC1672901	ENSMUST00000006898	1077.15	521.922	930.096	1293.79	1007.55	604.883	519.902	440.983
BC020078	0.00059265	0.0939301	3.07238	up	BC020078	N/A	N/A	Mus musculus similar to hypothetical protein MGC37588, mRNA (cDNA clone MGC:28125 IMAGE:3980327), complete cds.	N/A	chr17	74236002	74237878							9695.48	3190.27	9140.23	9811.49	10134.7	3240.15	3754.75	2575.91
BC020080	0.000444526	0.089091	2.02195	up	BC020080	Tmem140	1110007F12Rik	Mus musculus transmembrane protein 140, mRNA (cDNA clone MGC:28217 IMAGE:3990521), complete cds.	68487	chr6	34822526	34823868		GO:0016020(membrane);GO:0016021(integral to membrane)		Mm.248440	TC1578850///TC1628967	ENSMUST00000074949	893.614	441.846	976.234	876.141	828.468	411.742	433.18	480.615
BC021319	0.0174599	0.228782	2.77834	up	BC021319	6720457D02Rik	-	Mus musculus cDNA clone IMAGE:5035411.	77117	chr13	62619424	62659959	GO:0006355(regulation of transcription, DNA-dependent)	GO:0005622(intracellular);GO:0005634(nucleus)	GO:0003676(nucleic acid binding);GO:0008270(zinc ion binding);GO:0046872(metal ion binding)	Mm.445930///Mm.247448	TC1624430///TC1590893		146.801	55.5647	123.032	141.484	175.887	40.9747	41.243	84.4764
BC021424	0.00403549	0.147715	2.02929	up	BC021424	Pola2	AI573378	Mus musculus polymerase (DNA directed), alpha 2, mRNA (cDNA clone MGC:29125 IMAGE:5011204), complete cds.	18969	chr19	5940545	5964170	GO:0000060(protein import into nucleus, translocation);GO:0006260(DNA replication)	GO:0005634(nucleus);GO:0005658(alpha DNA polymerase:primase complex)	GO:0003677(DNA binding);GO:0003887(DNA-directed DNA polymerase activity);GO:0005515(protein binding);GO:0046982(protein heterodimerization activity)	Mm.209931	TC1593237///TC1628809///TC1594594	ENSMUST00000025752	532.133	265.801	524.942	549.502	521.956	265.571	319.478	212.354
BC021814	0.0119149	0.206939	2.89176	up	BC021814	Atp9a	IIa,mKIAA0611	Mus musculus ATPase, class II, type 9A, mRNA (cDNA clone IMAGE:3586316), complete cds.	11981	chr2	168493070	168567300	GO:0006810(transport);GO:0006812(cation transport);GO:0008152(metabolic process);GO:0015914(phospholipid transport)	GO:0016020(membrane);GO:0016021(integral to membrane)	GO:0000166(nucleotide binding);GO:0000287(magnesium ion binding);GO:0003824(catalytic activity);GO:0004012(phospholipid-translocating ATPase activity);GO:0005524(ATP binding);GO:0015662(ATPase activity, coupled to transmembrane movement of ions, phosphorylative mechanism);GO:0016787(hydrolase activity);GO:0046872(metal ion binding)	Mm.330819	TC1602065	ENSMUST00000029060	114.786	38.3914	156.729	74.4004	113.229	41.7322	43.0519	30.3901
BC022176	0.0305308	0.278565	2.51074	up	BC022176	Ptx3	AI607804,TSG-14	Mus musculus pentraxin related gene, mRNA (cDNA clone MGC:13999 IMAGE:4012053), complete cds.	19288	chr3	66023831	66029727	GO:0001878(response to yeast);GO:0008228(opsonization);GO:0045429(positive regulation of nitric oxide biosynthetic process);GO:0050766(positive regulation of phagocytosis)	GO:0005615(extracellular space)	GO:0001872(zymosan binding)	Mm.442151///Mm.276776	TC1582385	ENSMUST00000029421	178.431	73.6924	148.425	228.86	158.009	93.5738	42.7709	84.7324
BC022765	0.0101502	0.198697	2.08999	up	BC022765	Atad4	BC022765,E230006A12Rik,MGC37495	Mus musculus ATPase family, AAA domain containing 4, mRNA (cDNA clone MGC:32154 IMAGE:4925830), complete cds.	217138	chr11	96790637	96796961				Mm.342551	TC1578624	ENSMUST00000062172///ENSMUST00000054311	157.88	73.5734	121.407	143.31	208.924	72.9477	74.7541	73.0183
BC023245	0.0311048	0.281892	3.22295	up	BC023245	Rassf4	3830411C14Rik,AD037,AI586137	Mus musculus Ras association (RalGDS/AF-6) domain family 4, mRNA (cDNA clone MGC:27537 IMAGE:4459337), complete cds.	213391	chr6	116592952	116623807	GO:0007049(cell cycle);GO:0007165(signal transduction);GO:0007218(neuropeptide signaling pathway);GO:0045786(negative regulation of progression through cell cycle)		GO:0005515(protein binding)	Mm.257931	TC1678799///TC1587792///TC1675625///TC1578120	ENSMUST00000035842	160.925	52.3259	172.146	103.755	206.875	45.1769	29.7895	82.0114
BC023318	0.00881106	0.191038	2.53902	up	BC023318	Chrnb1	Achr-2,Acrb	Mus musculus cholinergic receptor, nicotinic, beta polypeptide 1 (muscle), mRNA (cDNA clone MGC:28277 IMAGE:4009493), complete cds.	11443	chr11	69597537	69609445	GO:0006810(transport);GO:0006811(ion transport)	GO:0005615(extracellular space);GO:0005794(Golgi apparatus);GO:0005886(plasma membrane);GO:0016020(membrane);GO:0016021(integral to membrane);GO:0045211(postsynaptic membrane)	GO:0004872(receptor activity);GO:0004889(nicotinic acetylcholine-activated cation-selective channel activity);GO:0005216(ion channel activity);GO:0005230(extracellular ligand-gated ion channel activity);GO:0030594(neurotransmitter receptor activity)	Mm.86425	TC1668336	ENSMUST00000045971	71.2999	28.9013	63.4156	79.5318	70.9522	37.8354	20.0531	28.8153
BC023805	0.0295335	0.276163	2.20931	up	BC023805	Zfp442	MGC38507,OTTMUSG00000015730,ZIPO-II	Mus musculus predicted gene, OTTMUSG00000015730, mRNA (cDNA clone MGC:38507 IMAGE:5352880), complete cds.	668923	chr2	150232872	150277222		GO:0005634(nucleus)	GO:0008270(zinc ion binding);GO:0046872(metal ion binding)	Mm.393876	TC1711418///TC1588278	ENSMUST00000089201///ENSMUST00000073782	221.464	104.609	240.752	233.084	190.555	116.825	133.352	63.6499
BC024321	0.0164779	0.226544	3.23851	up	BC024321	Muc13	114/A10,14/A10,AI159736,Lrrp,Ly64,NJ-1	Mus musculus mucin 13, epithelial transmembrane, mRNA (cDNA clone MGC:18590 IMAGE:4219376), complete cds.	17063	chr16	33794452	33820013	GO:0006952(defense response)	GO:0005886(plasma membrane);GO:0016020(membrane);GO:0016021(integral to membrane)		Mm.3177	TC1580350		259.082	85.2148	207.668	265.63	303.949	75.3018	50.4807	129.862
BC024373	0.0177975	0.230332	2.35608	up	BC024373	Guca2b	AV066530,Gcap2,Ugn	Mus musculus guanylate cyclase activator 2b (retina), mRNA (cDNA clone MGC:36015 IMAGE:4971289), complete cds.	14916	chr4	119329207	119331493	GO:0006182(cGMP biosynthetic process);GO:0007588(excretion);GO:0007589(fluid secretion);GO:0045776(negative regulation of blood pressure)	GO:0005615(extracellular space)	GO:0008047(enzyme activator activity)	Mm.278	TC1581820	ENSMUST00000044426	97.8939	41.3601	93.8775	127.098	72.7064	45.1679	30.0598	48.8527
BC025119	0.042885	0.314914	2.20913	up	BC025119	Fermt3	C79673,Kindlin-3,MGC36836,MGC38286	Mus musculus cDNA sequence BC032204, mRNA (cDNA clone MGC:36836 IMAGE:4190760), complete cds.	108101	chr19	7073467	7093891	GO:0007155(cell adhesion)	GO:0005856(cytoskeleton)	GO:0005515(protein binding)	Mm.157591	TC1572387	ENSMUST00000040772	175.962	84.0188	144.388	210.661	172.835	61.5703	129.176	61.3097
BC025170	0.00906115	0.192358	3.20531	up	BC025170	0610037M15Rik	-	Mus musculus RIKEN cDNA 0610037M15 gene, mRNA (cDNA clone IMAGE:4013674), containing frame-shift errors.	68395	chr17	35562052	35566998							336.414	107.94	306.928	418.942	283.372	123.255	133.136	67.4282
BC026134	0.00311246	0.134053	3.1934	up	BC026134	Pdk4	AV005916	Mus musculus pyruvate dehydrogenase kinase, isoenzyme 4, mRNA (cDNA clone MGC:13840 IMAGE:4188580), complete cds.	27273	chr6	5433354	5446296	GO:0005975(carbohydrate metabolic process);GO:0006006(glucose metabolic process);GO:0006086(acetyl-CoA biosynthetic process from pyruvate);GO:0016310(phosphorylation);GO:0018106(peptidyl-histidine phosphorylation)	GO:0005739(mitochondrion);GO:0005743(mitochondrial inner membrane)	GO:0004673(protein histidine kinase activity);GO:0004712(protein threonine/tyrosine kinase activity);GO:0005524(ATP binding);GO:0016301(kinase activity);GO:0016740(transferase activity);GO:0016772(transferase activity, transferring phosphorus-containing groups)	Mm.235547	TC1580048	ENSMUST00000019721	2839.34	881.277	2559.94	3678.03	2280.07	857.883	1063.21	722.74
BC026502	0.0034537	0.137665	3.10115	up	BC026502	Spire2	BC026502,KIAA1832,MGC31610,Spir-2,Spir2	Mus musculus spire homolog 2 (Drosophila), mRNA (cDNA clone MGC:31610 IMAGE:4506974), complete cds.	234857	chr8	125874150	125893418	GO:0008150(biological_process)	GO:0005575(cellular_component)	GO:0003674(molecular_function);GO:0008270(zinc ion binding)	Mm.150200	TC1585992	ENSMUST00000010298	273.429	90.1801	302.295	237.205	280.787	64.628	90.5411	115.371
BC026937	0.00365198	0.14212	2.72893	up	BC026937	Lilrb3	Gp91,Pirb	Mus musculus leukocyte immunoglobulin-like receptor, subfamily B (with TM and ITIM domains), member 3, mRNA (cDNA clone MGC:30225 IMAGE:4488338), complete cds.	18733	chr7	3664133	3796635	GO:0001782(B cell homeostasis);GO:0019221(cytokine and chemokine mediated signaling pathway);GO:0019724(B cell mediated immunity);GO:0043011(myeloid dendritic cell differentiation)		GO:0004872(receptor activity)	Mm.440814	TC1579581	ENSMUST00000078451	110.572	39.7355	144.27	86.3405	101.107	44.8853	37.6632	36.6581
BC027528	0.00435134	0.152295	2.1082	up	BC027528	Cd3g	Ctg-3,Ctg3,T3g	Mus musculus CD3 antigen, gamma polypeptide, mRNA (cDNA clone MGC:41180 IMAGE:1494674), complete cds.	12502	chr9	44777828	44788445	GO:0006461(protein complex assembly);GO:0007163(establishment and/or maintenance of cell polarity);GO:0007166(cell surface receptor linked signal transduction);GO:0015031(protein transport);GO:0042110(T cell activation);GO:0042981(regulation of apoptosis)	GO:0005887(integral to plasma membrane);GO:0016020(membrane);GO:0016021(integral to membrane);GO:0042105(alpha-beta T cell receptor complex)	GO:0004872(receptor activity);GO:0004888(transmembrane receptor activity);GO:0005515(protein binding);GO:0030159(receptor signaling complex scaffold activity);GO:0042608(T cell receptor binding);GO:0046982(protein heterodimerization activity)	Mm.335106	TC1584247	ENSMUST00000002101	68.1898	32.771	63.6065	67.588	73.3749	40.1639	26.4046	31.7446
BC027561	0.0044361	0.153478	3.23781	up	BC027561	Ubash3a	5830413C03Rik,C330001M22,Sts-2	Mus musculus ubiquitin associated and SH3 domain containing, A, mRNA (cDNA clone IMAGE:3375785), with apparent retained intron.	328795	chr17	31345044	31353176	GO:0001817(regulation of cytokine production);GO:0008152(metabolic process);GO:0050860(negative regulation of T cell receptor signaling pathway)		GO:0003824(catalytic activity)	Mm.387930	TC1586346	ENSMUST00000048656	103.6	33.0313	93.2078	102.288	115.304	34.7921	22.0109	42.291
BC028428	0.000484815	0.089091	2.05497	up	BC028428	3010026O09Rik	2900016G09Rik,AI851514,AW475975	Mus musculus RIKEN cDNA 3010026O09 gene, mRNA (cDNA clone MGC:41012 IMAGE:1315017), complete cds.	68067	chr11	49988367	50013617				Mm.390357	TC1623417///TC1583816///TC1638691	ENSMUST00000020647	678.23	330.759	720.509	679.853	634.328	309.994	311.606	370.676
BC028977	0.0317234	0.283155	2.28649	up	BC028977	Tpra1	40kDa,Gpr175,Tpra40	Mus musculus G protein-coupled receptor 175, mRNA (cDNA clone MGC:36786 IMAGE:5363085), complete cds.	24100	chr6	88852330	88862211		GO:0016020(membrane);GO:0016021(integral to membrane)		Mm.284480	TC1634473	ENSMUST00000055022	2124.15	976.775	1755.53	2252.8	2364.12	645.55	836.693	1448.08
BC029620	0.0394192	0.305481	2.31407	up	BC029620	H2-Aa	Aalpha,H-2Aa,H2Aa,I-Aalpha,IAalpha,Ia-1,Ia1	Mus musculus histocompatibility 2, class II antigen A, alpha, mRNA (cDNA clone MGC:25392 IMAGE:2609494), complete cds.	14960	chr17	34419702	34424741	GO:0006955(immune response);GO:0019882(antigen processing and presentation);GO:0019886(antigen processing and presentation of exogenous peptide antigen via MHC class II);GO:0045582(positive regulation of T cell differentiation);GO:0048002(antigen processing and presentation of peptide antigen)	GO:0005764(lysosome);GO:0005886(plasma membrane);GO:0009897(external side of plasma membrane);GO:0016020(membrane);GO:0016021(integral to membrane);GO:0042613(MHC class II protein complex)	GO:0005515(protein binding);GO:0042605(peptide antigen binding)	Mm.235338	TC1616598	ENSMUST00000040655	241.467	99.4638	183.337	370.087	170.977	98.2933	122.082	78.0166
BC030306	8.70291e-05	0.0713968	2.12375	up	BC030306	Ap3b2	AI549966,AU042881,MGC36656,Naptb,[b]-NAP,beta-NAP,beta3B	Mus musculus adaptor-related protein complex 3, beta 2 subunit, mRNA (cDNA clone IMAGE:5369005), with apparent retained intron.	11775	chr7	88605284	88610181	GO:0006810(transport);GO:0006886(intracellular protein transport);GO:0006897(endocytosis);GO:0015031(protein transport);GO:0016192(vesicle-mediated transport)	GO:0005802(trans-Golgi network);GO:0005905(coated pit)	GO:0005488(binding)	Mm.322894	NP437172///TC1579440	ENSMUST00000082090	4175.12	1968.81	4276.21	4230.79	4018.37	1844.3	2131.21	1930.91
BC030401	0.045273	0.320728	2.12529	up	BC030401	Gm4983	EG245297	Mus musculus predicted gene, EG245297, mRNA (cDNA clone MGC:40732 IMAGE:5362444), complete cds.	245297	chr12	17999671	18072415	GO:0006355(regulation of transcription, DNA-dependent)	GO:0005622(intracellular)	GO:0003676(nucleic acid binding);GO:0005509(calcium ion binding)	Mm.388847	TC1594102	ENSMUST00000073410	317.754	142.544	211.6	473.319	268.344	155.227	113.505	158.901
BC030718	0.034327	0.291452	2.13935	up	BC030718	Apob48r	Apob-48r	Mus musculus apolipoprotein B48 receptor, mRNA (cDNA clone MGC:28748 IMAGE:4482457), complete cds.	171504	chr7	133728513	133732639	GO:0008150(biological_process)	GO:0005575(cellular_component)	GO:0004872(receptor activity);GO:0005509(calcium ion binding);GO:0030226(apolipoprotein receptor activity)	Mm.170665	TC1582093	ENSMUST00000039522	358.901	171.587	376.122	275.906	424.675	109.933	197.005	207.823
BC031438	0.00117612	0.106392	4.75368	up	BC031438	Extl2	3000001D04Rik,AW146439	Mus musculus exotoses (multiple)-like 2, mRNA (cDNA clone MGC:28403 IMAGE:4024555), complete cds.	58193	chr3	115710402	115731255	GO:0006044(N-acetylglucosamine metabolic process);GO:0019276(UDP-N-acetylgalactosamine metabolic process)	GO:0005615(extracellular space);GO:0005783(endoplasmic reticulum);GO:0016020(membrane);GO:0016021(integral to membrane)	GO:0001888(glucuronyl-galactosyl-proteoglycan 4-alpha-N-acetylglucosaminyltransferase activity);GO:0016740(transferase activity);GO:0016757(transferase activity, transferring glycosyl groups);GO:0030145(manganese ion binding);GO:0035248(alpha-1,4-N-acetylgalactosaminyltransferase activity);GO:0046872(metal ion binding)	Mm.41739	TC1577118	ENSMUST00000029575	319.409	67.7909	377.942	326.95	253.334	87.0705	52.2632	64.039
BC031475	0.0362882	0.296865	2.29795	up	BC031475	5830443L24Rik	mGBP8	Mus musculus RIKEN cDNA 5830443L24 gene, mRNA (cDNA clone MGC:27754 IMAGE:2654170), complete cds.	76074	chr5	105443171	105482575	GO:0006955(immune response)		GO:0003924(GTPase activity);GO:0005525(GTP binding)	Mm.425261	NP1482450	ENSMUST00000031235	129.448	59.992	140.529	131.187	116.628	85.4073	59.979	34.5897
BC031709	0.0437632	0.317708	2.07196	up	BC031709	D2Ertd750e	1700025D04Rik,C15orf23	Mus musculus DNA segment, Chr 2, ERATO Doi 750, expressed, mRNA (cDNA clone MGC:30961 IMAGE:4021550), complete cds.	51944	chr2	118640030	118660319	GO:0008150(biological_process)	GO:0005575(cellular_component);GO:0005634(nucleus)	GO:0005515(protein binding)	Mm.252695	TC1618039	ENSMUST00000028803	174.767	89.144	153.426	173.339	197.536	62.3813	70.2177	134.833
BC034116	0.041769	0.311869	2.29836	up	BC034116	Plcxd1	A330045H12Rik,Gm576	Mus musculus phosphatidylinositol-specific phospholipase C, X domain containing 1, mRNA (cDNA clone IMAGE:4511298), with apparent retained intron.	403178	chr5	110530222	110532834	GO:0007242(intracellular signaling cascade)		GO:0004629(phospholipase C activity)	Mm.297057	TC1588764	ENSMUST00000086687	177.88	75.9288	199.55	225.714	108.375	56.8837	70.1563	100.746
BC034205	0.00511981	0.160601	2.06199	up	BC034205	Slc16a9	1200003C15Rik,4930425B13Rik,AI552636	Mus musculus solute carrier family 16 (monocarboxylic acid transporters), member 9, mRNA (cDNA clone MGC:37543 IMAGE:4987055), complete cds.	66859	chr10	69708068	69747887	GO:0006810(transport)	GO:0016020(membrane);GO:0016021(integral to membrane)	GO:0005215(transporter activity)	Mm.19325	TC1642919	ENSMUST00000046807	2562.71	1263.43	2600.57	2547.42	2540.14	975.496	1522.01	1292.78
BC034256	0.00757815	0.182082	3.76121	up	BC034256	Tgtp	Gtp2,Irgb6,Mg21	Mus musculus T-cell specific GTPase, mRNA (cDNA clone MGC:18429 IMAGE:3662733), complete cds.	21822	chr11	48799865	48805718	GO:0006955(immune response);GO:0009615(response to virus)	GO:0005575(cellular_component);GO:0005622(intracellular)	GO:0003924(GTPase activity);GO:0005525(GTP binding)	Mm.15793	TC1573312	ENSMUST00000068063///ENSMUST00000094476	414.753	113.83	354.935	536.366	352.958	162.965	104.049	74.4763
BC034257	0.00068583	0.0954225	2.53659	up	BC034257	Emp1	TMP	Mus musculus epithelial membrane protein 1, mRNA (cDNA clone MGC:7092 IMAGE:3157463), complete cds.	13730	chr6	135313048	135333191	GO:0016049(cell growth)	GO:0016020(membrane);GO:0016021(integral to membrane)		Mm.182785	TC1682741	ENSMUST00000032330	1042.52	408.494	1184.45	1068.53	874.576	388.882	442.434	394.167
BC034523	0.00423273	0.150412	4.13862	up	BC034523	Relb	MGC143683,MGC143684	Mus musculus avian reticuloendotheliosis viral (v-rel) oncogene related B, mRNA (cDNA clone MGC:25383 IMAGE:4485540), complete cds.	19698	chr7	20191570	20214600	GO:0000074(regulation of progression through cell cycle);GO:0006350(transcription);GO:0006355(regulation of transcription, DNA-dependent);GO:0009987(cellular process);GO:0019882(antigen processing and presentation);GO:0042088(T-helper 1 type immune response);GO:0043011(myeloid dendritic cell differentiation);GO:0045063(T-helper 1 cell differentiation);GO:0045449(regulation of transcription)	GO:0005622(intracellular);GO:0005634(nucleus)	GO:0003677(DNA binding);GO:0003700(transcription factor activity)	Mm.1741	TC1581637	ENSMUST00000049912	178.745	43.2421	153.96	241.826	140.449	41.1781	57.266	31.2823
BC034852	0.0245513	0.25961	2.00306	up	BC034852	Icos	AILIM,H4,Ly115	Mus musculus inducible T-cell co-stimulator, mRNA (cDNA clone MGC:41104 IMAGE:1364228), complete cds.	54167	chr1	61034770	61055281		GO:0005887(integral to plasma membrane);GO:0009897(external side of plasma membrane);GO:0016020(membrane);GO:0016021(integral to membrane)	GO:0005515(protein binding)	Mm.42044	TC1641189///TC1583048	ENSMUST00000102827	107.939	53.9884	122.663	80.5345	120.618	53.8551	67.0551	41.055
BC037076	0.0380825	0.301959	2.20932	up	BC037076	Srgn	Prg,Prg1,Sgc	Mus musculus serglycin, mRNA (cDNA clone MGC:46886 IMAGE:5038568), complete cds.	19073	chr10	61957174	61970482		GO:0005615(extracellular space)		Mm.338790	TC1575266	ENSMUST00000020271	390.591	185.603	375.772	453.659	342.342	209.664	107.878	239.268
BC037095	0.0488594	0.330505	2.00798	up	BC037095	Tmem39b	6330509E05Rik,BC037095,MGC59407	Mus musculus transmembrane protein 39b, mRNA (cDNA clone IMAGE:5343373).	230770	chr4	129353598	129374082		GO:0016020(membrane);GO:0016021(integral to membrane)		Mm.257157	TC1583687	ENSMUST00000102588	168.654	82.3993	231.898	115.583	158.481	62.5803	80.6064	104.011
BC037993	0.00127601	0.106392	2.63713	up	BC037993	Smtnl2	D130058I21Rik,MGC47155	Mus musculus smoothelin-like 2, mRNA (cDNA clone MGC:47155 IMAGE:5064159), complete cds.	276829	chr11	72203615	72225202		GO:0005634(nucleus)		Mm.46732		ENSMUST00000050226	422.785	159.428	346.368	434.697	487.291	163.949	139.837	174.497
BC038083	0.00763354	0.182887	2.72777	up	BC038083	Ptgds	21kDa,L-PGDS,PGD2,PGDS,PGDS2,Ptgs3	Mus musculus prostaglandin D2 synthase (brain), mRNA (cDNA clone MGC:47365 IMAGE:4481308), complete cds.	19215	chr2	25322230	25324903	GO:0001516(prostaglandin biosynthetic process);GO:0006629(lipid metabolic process);GO:0006633(fatty acid biosynthetic process);GO:0006693(prostaglandin metabolic process);GO:0006810(transport);GO:0008610(lipid biosynthetic process);GO:0045187(regulation of circadian sleep/wake cycle, sleep)	GO:0005576(extracellular region);GO:0005634(nucleus);GO:0005635(nuclear envelope);GO:0005783(endoplasmic reticulum);GO:0005791(rough endoplasmic reticulum);GO:0005794(Golgi apparatus);GO:0016020(membrane)	GO:0004667(prostaglandin-D synthase activity);GO:0005215(transporter activity);GO:0005488(binding);GO:0005501(retinoid binding);GO:0016853(isomerase activity)	Mm.1008	TC1575855		159.57	56.374	183.618	192.136	102.956	54.2094	57.5554	57.3573
BC038125	0.00725543	0.178691	4.37745	up	BC038125	6820431F20Rik	2610005L07Rik,2810038F24Rik,6720476A01Rik	Mus musculus RIKEN cDNA 6820431F20 gene, mRNA (cDNA clone IMAGE:1262936), with apparent retained intron.	381598	chr8	19869457	19878981				Mm.362165///Mm.359054///Mm.440442	TC1734159///TC1627899///TC1770362///TC1601697///TC1598794	ENSMUST00000098902///ENSMUST00000096485	121.716	29.9412	136.439	110.746	117.963	43.9556	29.4559	16.412
BC043064	0.0474215	0.326253	2.31894	up	BC043064	Rps6ka2	90kDa,D17Wsu134e,Rps6ka-rs1,Rsk3,p90rsk,pp90rsk	Mus musculus ribosomal protein S6 kinase, polypeptide 2, mRNA (cDNA clone MGC:57968 IMAGE:5706153), complete cds.	20112	chr17	7374513	7507664	GO:0000089(mitotic metaphase);GO:0001556(oocyte maturation);GO:0006468(protein amino acid phosphorylation);GO:0042254(ribosome biogenesis and assembly)	GO:0005634(nucleus);GO:0005737(cytoplasm);GO:0005819(spindle)	GO:0000166(nucleotide binding);GO:0003735(structural constituent of ribosome);GO:0004672(protein kinase activity);GO:0004674(protein serine/threonine kinase activity);GO:0005515(protein binding);GO:0005524(ATP binding);GO:0016301(kinase activity);GO:0016740(transferase activity)	Mm.268383	TC1599360	ENSMUST00000024575	94.017	42.0866	67.2564	114.974	99.821	39.24	61.2767	25.7432
BC046306	0.0162215	0.226128	2.23889	up	BC046306	Art4	4432404K01Rik,DO,DOK1	Mus musculus ADP-ribosyltransferase 4, mRNA (cDNA clone MGC:54463 IMAGE:6306234), complete cds.	109978	chr6	136796973	136806042	GO:0006471(protein amino acid ADP-ribosylation);GO:0008150(biological_process)	GO:0005575(cellular_component)	GO:0003674(molecular_function);GO:0003956(NAD(P)+-protein-arginine ADP-ribosyltransferase activity);GO:0016740(transferase activity);GO:0016757(transferase activity, transferring glycosyl groups)	Mm.31840	TC1582746	ENSMUST00000032341	287.599	126.913	312.439	347.86	202.499	113.17	157.66	109.911
BC046387	0.0100275	0.198147	2.0005	up	BC046387	Zbtb42	EG382639,Gm5188,simiRP58	Mus musculus predicted gene, EG382639, mRNA (cDNA clone IMAGE:4954312), partial cds.	382639	chr12	113917038	113919470		GO:0005622(intracellular)	GO:0003676(nucleic acid binding);GO:0008270(zinc ion binding)	Mm.11350	TC1598715		335.019	168.553	276.535	360.218	368.303	153.707	142.002	209.951
BC046591	0.0122614	0.208634	2.21742	up	BC046591	Lrrc1	A430093J20Rik,AU016091,D030059I21,KIAA4018,MGC90936,mKIAA4018	Mus musculus leucine rich repeat containing 1, mRNA (cDNA clone IMAGE:6308934), partial cds.	214345	chr9	77278895	77392659		GO:0016020(membrane)	GO:0005515(protein binding)	Mm.28534	TC1777801///TC1580632///TC1591656	ENSMUST00000049755	270.657	123.897	317.712	264.135	230.122	148.994	88.7519	133.946
BC046626	0.0111716	0.204327	3.39115	up	BC046626	Gm5478	EG432987,MGC54654	Mus musculus predicted gene, EG432987, mRNA (cDNA clone MGC:54654 IMAGE:6494053), complete cds.	432987	chr15	101473450	101477811			GO:0005198(structural molecule activity)	Mm.450174	TC1595461	ENSMUST00000055625	141.048	39.9787	84.7904	193.587	144.766	45.969	43.4853	30.4819
BC048742	0.00834824	0.188823	3.47731	up	BC048742	Gm14525	OTTMUSG00000017011	Mus musculus Xmr protein, mRNA (cDNA clone IMAGE:6774803).	100039120	chrX	26099905	26129764							161.403	46.4094	108.178	176.751	199.279	37.9742	63.9197	37.3344
BC049940	0.010321	0.200223	2.13548	up	BC049940	Fam164c	2810002I04Rik,AV046379	Mus musculus RIKEN cDNA 2810002I04 gene, mRNA (cDNA clone MGC:54815 IMAGE:6305959), complete cds.	72350	chr12	86629626	86637898				Mm.158810	TC1584971	ENSMUST00000059341	138.198	64.7519	112.848	132.865	168.882	80.6411	58.4447	55.17
BC049957	0.0068595	0.175066	2.42956	up	BC049957	Srxn1	1700127B04Rik,AI854065,AW488194,Npn3,Srx,TX01	Mus musculus sulfiredoxin 1 homolog (S. cerevisiae), mRNA (cDNA clone MGC:58982 IMAGE:4507800), complete cds.	76650	chr2	151931259	151936326	GO:0006979(response to oxidative stress)	GO:0005829(cytosol)	GO:0000166(nucleotide binding);GO:0000287(magnesium ion binding);GO:0003677(DNA binding);GO:0005524(ATP binding);GO:0016209(antioxidant activity);GO:0016491(oxidoreductase activity);GO:0016667(oxidoreductase activity, acting on sulfur group of donors)	Mm.218639	TC1576027	ENSMUST00000099225///ENSMUST00000041500	1097.27	446.176	814.363	1335.87	1141.59	467.191	502.357	368.981
BC050899	0.00917508	0.192885	2.23135	up	BC050899	Emp1	TMP	Mus musculus epithelial membrane protein 1, mRNA (cDNA clone MGC:63263 IMAGE:6402273), complete cds.	13730	chr6	135317510	135333191	GO:0016049(cell growth)	GO:0016020(membrane);GO:0016021(integral to membrane)		Mm.182785	TC1682741	ENSMUST00000032330	1007.19	451.451	786.073	1175	1060.49	543.384	358.987	451.981
BC050980	0.0060602	0.169182	2.32195	up	BC050980	Wdr52	6330444M21Rik,D16Ertd642e,Gm1750	Mus musculus WD repeat domain 52, mRNA (cDNA clone IMAGE:6706872).	212517	chr16	44394911	44405008				Mm.425958///Mm.379869	TC1623311///TC1665987		122.269	51.4412	100.446	104.114	162.246	49.8865	49.0781	55.3591
BC051090	0.0139336	0.215882	2.37839	up	BC051090	Myo15b	E330039G21Rik,Gm688,Gm886,mKIAA1783	Mus musculus myosin XVB, mRNA (cDNA clone IMAGE:6530363), partial cds.	217328	chr11	115748878	115753918		GO:0005856(cytoskeleton);GO:0016459(myosin complex)	GO:0003774(motor activity);GO:0005524(ATP binding)	Mm.308940	TC1610562	ENSMUST00000040703	95.4606	39.1074	65.9161	94.9829	125.483	32.3707	42.9829	41.9687
BC051125	0.0357149	0.295076	2.18372	up	BC051125	Dock4	5330406C03,6330411N01Rik,AF263288,C030023J22,mKIAA0716	Mus musculus dedicator of cytokinesis 4, mRNA (cDNA clone IMAGE:6515392), containing frame-shift errors.	238130	chr12	41516662	41573075		GO:0016020(membrane)	GO:0005085(guanyl-nucleotide exchange factor activity)	Mm.341423	TC1600595///TC1586466///TC1608656///TC1601249///TC1601947	ENSMUST00000037488	81.5876	36.0983	82.9327	51.3703	110.46	33.2432	30.5412	44.5105
BC051450	0.00890021	0.191038	2.02825	up	BC051450	Psmb8	Lmp-7,Lmp7	Mus musculus proteasome (prosome, macropain) subunit, beta type 8 (large multifunctional peptidase 7), mRNA (cDNA clone MGC:60583 IMAGE:30076739), complete cds.	16913	chr17	34335320	34338393	GO:0006511(ubiquitin-dependent protein catabolic process);GO:0006955(immune response);GO:0019882(antigen processing and presentation)	GO:0005634(nucleus);GO:0005829(cytosol);GO:0005839(proteasome core complex (sensu Eukaryota));GO:0043234(protein complex)	GO:0004175(endopeptidase activity);GO:0004298(threonine endopeptidase activity);GO:0008233(peptidase activity);GO:0016787(hydrolase activity)	Mm.180191	TC1574225	ENSMUST00000025196	332.678	163.45	349.698	384.726	263.609	168.636	134.983	186.731
BC051589	0.00135396	0.106884	2.96287	up	BC051589	N/A	N/A	Mus musculus cDNA clone IMAGE:5255639.	N/A	chr7	97592187	97593964							1053.26	360.15	1096.76	1122.84	940.171	304.527	453.84	322.083
BC052093	0.0153512	0.220954	2.25863	up	BC052093	Adam1a	Adam1,Ftna	Mus musculus a disintegrin and metallopeptidase domain 1a, mRNA (cDNA clone MGC:62530 IMAGE:5695131), complete cds.	280668	chr5	121968612	121971704	GO:0006508(proteolysis);GO:0007229(integrin-mediated signaling pathway);GO:0007339(binding of sperm to zona pellucida);GO:0007342(fusion of sperm to egg plasma membrane)	GO:0016020(membrane);GO:0016021(integral to membrane);GO:0045121(lipid raft)	GO:0004222(metalloendopeptidase activity);GO:0005515(protein binding);GO:0008233(peptidase activity);GO:0008237(metallopeptidase activity);GO:0008270(zinc ion binding);GO:0016787(hydrolase activity);GO:0046872(metal ion binding)	Mm.1453	TC1583139	ENSMUST00000100757	290.518	131.274	324.756	312.279	234.519	118.248	176.888	98.6858
BC052689	0.0455062	0.321675	3.2859	up	BC052689	Ldoc1	Gm366,Mar7,Mart7	Mus musculus leucine zipper, down-regulated in cancer 1, mRNA (cDNA clone MGC:60754 IMAGE:30053634), complete cds.	434784	chrX	58962790	58964125		GO:0005634(nucleus)		Mm.23468	TC1584735	ENSMUST00000075983	153.39	49.0593	115.65	232.304	112.216	46.1821	23.8518	77.1439
BC052819	0.0128593	0.210891	2.12644	up	BC052819	Fcgr3	CD16	Mus musculus Fc receptor, IgG, low affinity III, mRNA (cDNA clone MGC:60605 IMAGE:30044058), complete cds.	14131	chr1	172981299	172989476	GO:0001788(antibody-dependent cellular cytotoxicity);GO:0001798(positive regulation of type IIa hypersensitivity);GO:0001805(positive regulation of type III hypersensitivity);GO:0001812(positive regulation of type I hypersensitivity);GO:0001820(serotonin secretion);GO:0006910(phagocytosis, recognition);GO:0006911(phagocytosis, engulfment);GO:0007166(cell surface receptor linked signal transductio…	GO:0005615(extracellular space);GO:0016020(membrane);GO:0016021(integral to membrane)	GO:0004872(receptor activity);GO:0019770(IgG receptor activity);GO:0019864(IgG binding)	Mm.22119	TC1581981///TC1620445	ENSMUST00000027964	150.582	70.9086	146.41	184.469	120.866	67.7444	88.0922	56.8893
BC052917	0.0161081	0.225614	3.38562	up	BC052917	Fosl1	AW538199,Fra1,fra-1	Mus musculus fos-like antigen 1, mRNA (cDNA clone MGC:60604 IMAGE:30063479), complete cds.	14283	chr19	5447747	5455946	GO:0006355(regulation of transcription, DNA-dependent)	GO:0005634(nucleus)	GO:0003677(DNA binding);GO:0003700(transcription factor activity);GO:0046983(protein dimerization activity)	Mm.6215	TC1580200	ENSMUST00000025850	149.508	46.3491	109.35	164.959	174.215	26.811	44.7637	67.4727
BC053093	0.0239318	0.25718	2.08172	up	BC053093	Zfp324	A930002M05,D430030K24Rik,ZF5128	Mus musculus zinc finger protein 324, mRNA (cDNA clone MGC:62482 IMAGE:6400158), complete cds.	243834	chr7	13551212	13559171	GO:0006355(regulation of transcription, DNA-dependent)	GO:0005622(intracellular);GO:0005634(nucleus)	GO:0003676(nucleic acid binding);GO:0008270(zinc ion binding);GO:0046872(metal ion binding)	Mm.133086	NP574169	ENSMUST00000038701	247.172	118.487	241.401	313.016	187.099	87.7714	126.132	141.558
BC055441	3.76736e-05	0.0609347	3.0736	up	BC055441	Tubb2a	M(beta)2,Tubb2	Mus musculus tubulin, beta 2a, mRNA (cDNA clone MGC:65316 IMAGE:4016867), complete cds.	22151	chr13	34166146	34169855	GO:0007017(microtubule-based process);GO:0007018(microtubule-based movement);GO:0051258(protein polymerization)	GO:0005737(cytoplasm);GO:0005874(microtubule);GO:0043234(protein complex)	GO:0000166(nucleotide binding);GO:0003924(GTPase activity);GO:0005198(structural molecule activity);GO:0005200(structural constituent of cytoskeleton);GO:0005525(GTP binding)	Mm.422827	TC1572933///TC1702854	ENSMUST00000056427	4387.04	1427.37	4425.49	4665.51	4070.13	1434.42	1522.21	1325.5
BC055920	0.00982612	0.196835	2.59615	up	BC055920	Pik3ip1	1500004A08Rik,5830455E04Rik,Crkd,Hgfl	Mus musculus phosphoinositide-3-kinase interacting protein 1, mRNA (cDNA clone MGC:68315 IMAGE:4039129), complete cds.	216505	chr11	3230809	3242974		GO:0016020(membrane);GO:0016021(integral to membrane)		Mm.390323	TC1587444///TC1576893	ENSMUST00000045153	1099.4	440.591	1022.74	1166.15	1109.3	413.263	607.191	301.32
BC057037	0.0355978	0.294701	2.49808	up	BC057037	Gmip	5031419I10Rik	Mus musculus Gem-interacting protein, mRNA (cDNA clone MGC:67227 IMAGE:5702855), complete cds.	78816	chr8	72332585	72345769	GO:0007165(signal transduction);GO:0007242(intracellular signaling cascade);GO:0008152(metabolic process)	GO:0005622(intracellular)	GO:0005096(GTPase activator activity);GO:0005100(Rho GTPase activator activity);GO:0005515(protein binding);GO:0008270(zinc ion binding);GO:0016491(oxidoreductase activity);GO:0019992(diacylglycerol binding);GO:0046872(metal ion binding)	Mm.324305	TC1579387	ENSMUST00000036074	152.152	65.5659	168.981	150.542	136.932	35.4592	94.686	66.5525
BC057460	0.0196746	0.23837	2.73573	up	BC057460	Rasa4	AA793972,AW112107,BB079060,CAPRI,GAPL,KIAA0538,mKIAA0538	Mus musculus RAS p21 protein activator 4, mRNA (cDNA clone MGC:65435 IMAGE:4527934), complete cds.	54153	chr5	136559932	136587730	GO:0007242(intracellular signaling cascade);GO:0051056(regulation of small GTPase mediated signal transduction)	GO:0005622(intracellular)	GO:0005096(GTPase activator activity);GO:0008270(zinc ion binding);GO:0046872(metal ion binding)	Mm.290655	NP743015	ENSMUST00000042135	168.927	65.4986	175.539	182.164	149.078	70.0359	37.2747	89.1853
BC057580	0.00836893	0.188823	3.41075	up	BC057580	Bfsp1	-	Mus musculus beaded filament structural protein in lens-CP94, mRNA (cDNA clone MGC:67055 IMAGE:6412634), complete cds.	12075	chr2	143652263	143688909	GO:0006396(RNA processing)	GO:0005856(cytoskeleton);GO:0005882(intermediate filament);GO:0016020(membrane)	GO:0000175(3'-5'-exoribonuclease activity);GO:0003723(RNA binding);GO:0005212(structural constituent of eye lens)	Mm.275937	NP380401	ENSMUST00000028907	191.985	55.8199	144.009	163.528	268.418	47.7466	44.1654	75.5476
BC057899	0.0453029	0.320852	2.36373	up	BC057899	Igh	MGC102661,MGC102662,MGC103226,MGC118125,MGC28019,MGC36307,MGC6486,MGC6522,MGC6529,MGC6628,MGC6740,MGC68276,MGC68378	Mus musculus immunoglobulin heavy chain complex, mRNA (cDNA clone MGC:68283 IMAGE:5029179), complete cds.	111507	chr12	114496930	115332586				Mm.390473///Mm.342177///Mm.430747	TC1707890///NP1489570///TC1586115///NP1216021///NP048004///NP590647	ENSMUST00000103412///ENSMUST00000103505///ENSMUST00000103452///ENSMUST00000103504///ENSMUST00000103501	87.5643	35.5962	60.0033	68.3629	134.327	37.9484	43.6562	25.1841
BC059813	0.00391697	0.146636	3.25133	up	BC059813	Paqr8	1700019B16Rik,3110001D06Rik	Mus musculus progestin and adipoQ receptor family member VIII, mRNA (cDNA clone MGC:69571 IMAGE:6843180), complete cds.	74229	chr1	20880702	20928837		GO:0016020(membrane);GO:0016021(integral to membrane)	GO:0004872(receptor activity);GO:0005496(steroid binding);GO:0008289(lipid binding)	Mm.40780	TC1602486	ENSMUST00000068880	419.264	128.588	316.262	423.024	518.506	96.5782	147.627	141.558
BC060291	0.00145757	0.108613	3.91207	up	BC060291	Ripply3	Dscr6	Mus musculus ripply3 homolog (zebrafish), mRNA (cDNA clone MGC:70097 IMAGE:30135244), complete cds.	170765	chr16	94550070	94558239	GO:0008150(biological_process)	GO:0005575(cellular_component)	GO:0003674(molecular_function)	Mm.42604	TC1584917	ENSMUST00000023660	410.934	106.466	351.112	478.927	402.764	113.405	128.157	77.8345
BC060532	0.00437482	0.152295	2.14225	up	BC060532	Nrcam	Bravo,C030017F07Rik,C130076O07Rik,mKIAA0343	Mus musculus neuron-glia-CAM-related cell adhesion molecule, mRNA (cDNA clone IMAGE:6820873), partial cds.	319504	chr12	45677590	45699828	GO:0001764(neuron migration);GO:0007155(cell adhesion);GO:0007411(axon guidance);GO:0007413(axonal fasciculation);GO:0007416(synaptogenesis);GO:0007417(central nervous system development);GO:0016337(cell-cell adhesion);GO:0019227(action potential propagation);GO:0030516(regulation of axon extension);GO:0045162(clustering of voltage-gated sodium channels);GO:0045666(positive regulation of neuron d…	GO:0005615(extracellular space);GO:0005887(integral to plasma membrane);GO:0009897(external side of plasma membrane);GO:0016020(membrane);GO:0016021(integral to membrane);GO:0030424(axon)	GO:0005515(protein binding);GO:0030506(ankyrin binding)	Mm.208439	TC1585815///TC1578008///TC1586894	ENSMUST00000020939	508.29	240.208	499.941	468.098	556.831	196.498	297.029	227.097
BC061163	0.0122862	0.208699	2.39873	up	BC061163	Pde9a	PDE9A1	Mus musculus phosphodiesterase 9A, mRNA (cDNA clone MGC:74300 IMAGE:6533665), complete cds.	18585	chr17	31523195	31613043	GO:0007165(signal transduction)		GO:0003824(catalytic activity);GO:0004114(3',5'-cyclic-nucleotide phosphodiesterase activity);GO:0016787(hydrolase activity);GO:0030145(manganese ion binding);GO:0046872(metal ion binding);GO:0047555(3',5'-cyclic-GMP phosphodiesterase activity)	Mm.10812	TC1578640	ENSMUST00000047168	736.197	303.554	518.911	844.538	845.143	352.593	320.906	237.164
BC061218	0.00164683	0.113442	2.5209	up	BC061218	4930486L24Rik	AW545031	Mus musculus RIKEN cDNA 4930486L24 gene, mRNA (cDNA clone MGC:74366 IMAGE:30281034), complete cds.	214639	chr13	60943981	60965764	GO:0006508(proteolysis)		GO:0004197(cysteine-type endopeptidase activity);GO:0008234(cysteine-type peptidase activity)	Mm.19839	TC1584932	ENSMUST00000091569	93.1216	36.431	103.14	72.023	104.202	36.7827	37.1758	35.3346
BC061237	0.017781	0.230332	4.31892	up	BC061237	BC061237	MGC74390	Mus musculus cDNA sequence BC061237, mRNA (cDNA clone MGC:74390 IMAGE:6705671), complete cds.	385138	chr14	45119792	45126016				Mm.293026	TC1614033	ENSMUST00000096899	171.328	41.6622	215.897	187.906	110.182	55.8418	20.3722	48.7726
BC063063	0.0256977	0.263148	2.79136	up	BC063063	2410018L13Rik	2810480C08Rik	Mus musculus RIKEN cDNA 2410018L13 gene, mRNA (cDNA clone MGC:67215 IMAGE:6837407), complete cds.	69732	chr12	22990655	23046940	GO:0006355(regulation of transcription, DNA-dependent)	GO:0005622(intracellular)	GO:0003676(nucleic acid binding);GO:0005509(calcium ion binding)	Mm.391403	TC1590463		427.44	161.21	539.572	386.213	356.535	230.075	161.772	91.7822
BC064780	0.0269919	0.268457	3.62472	up	BC064780	Aurkc	AIE1,AIK3,Stk13	Mus musculus aurora kinase C, mRNA (cDNA clone MGC:76648 IMAGE:30476803), complete cds.	20871	chr7	6948213	6955802	GO:0006468(protein amino acid phosphorylation);GO:0007049(cell cycle)	GO:0000775(chromosome, pericentric region)	GO:0000166(nucleotide binding);GO:0004672(protein kinase activity);GO:0004674(protein serine/threonine kinase activity);GO:0005524(ATP binding);GO:0016301(kinase activity);GO:0016740(transferase activity)	Mm.261572	TC1635871	ENSMUST00000086248	167.281	50.1264	115.971	185.321	200.55	80.3804	44.9491	25.0498
BC065784	0.0439813	0.318464	2.79763	up	BC065784	Gp49a	gp49	Mus musculus cDNA clone IMAGE:3824921, containing frame-shift errors.	14727	chr10	51200484	51206025							281.329	102.263	171.318	302.231	370.438	139.171	56.7942	110.824
BC066875	0.00440575	0.152837	3.58784	up	BC066875	N/A	N/A	Mus musculus cDNA clone MGC:76795 IMAGE:30111586, complete cds.	N/A	chr4	145000198	146959302							132.156	36.4028	163.506	141.671	91.2915	43.9556	37.4016	27.8512
BC069187	0.000378155	0.089091	3.74493	up	BC069187	Dusp23	1300005N15Rik,LDP-3,MGC73633	Mus musculus dual specificity phosphatase 23, mRNA (cDNA clone MGC:73633 IMAGE:850475), complete cds.	68440	chr1	174561500	174563093	GO:0006470(protein amino acid dephosphorylation);GO:0016311(dephosphorylation)	GO:0005634(nucleus)	GO:0004721(phosphoprotein phosphatase activity);GO:0004725(protein tyrosine phosphatase activity);GO:0008138(protein tyrosine/serine/threonine phosphatase activity);GO:0016787(hydrolase activity);GO:0016791(phosphoric monoester hydrolase activity)	Mm.33024	TC1662840		119.333	31.5728	125.094	137.391	95.5155	33.1423	28.5951	32.981
BC071263	0.0128833	0.211151	2.1038	up	BC071263	N/A	N/A	Mus musculus cDNA clone IMAGE:6511278, partial cds.	N/A	chr14	7797960	7829805							363.67	177.368	360.986	388.445	341.579	123.078	198.928	210.098
BC071264	0.0233398	0.25474	2.06447	up	BC071264	Mad2l2	2310033C13Rik,MAD2B,REV7	Mus musculus MAD2 mitotic arrest deficient-like 2 (yeast), mRNA (cDNA clone MGC:78331 IMAGE:6516319), complete cds.	71890	chr4	147505028	147519788	GO:0007049(cell cycle);GO:0007067(mitosis);GO:0007094(mitotic spindle checkpoint);GO:0051301(cell division)			Mm.9648	TC1579800	ENSMUST00000030860	139.287	67.0111	100.849	147.457	169.555	74.3352	50.7749	75.9232
BC075668	0.000140417	0.0713968	3.83575	up	BC075668	Clu	AI893575,ApoJ,Cli,D14Ucla3,SP-40,Sgp-2,Sgp2,Sugp-2	Mus musculus clusterin, mRNA (cDNA clone MGC:99970 IMAGE:30550773), complete cds.	12759	chr14	66587490	66600384	GO:0008219(cell death)	GO:0005615(extracellular space)	GO:0005515(protein binding)	Mm.200608	TC1711534		1927.11	499.325	1795.81	1717.69	2267.84	509.628	525.49	462.856
BC079554	0.0197971	0.239071	2.98345	up	BC079554	Gm14326	OTTMUSG00000016327	Mus musculus cDNA clone IMAGE:30359088.	665211	chr2	177670697	177691993							228.817	81.0191	265.129	244.996	176.325	122.471	70.9539	49.6322
BC080288	0.0380819	0.301959	3.06415	up	BC080288	Scarf1	AA986099,KIAA0149,MGC90792,SREC,SREC-I,mKIAA0149	Mus musculus scavenger receptor class F, member 1, mRNA (cDNA clone MGC:90792 IMAGE:6411836), complete cds.	380713	chr11	75327042	75340066	GO:0016358(dendrite development)		GO:0004872(receptor activity);GO:0005515(protein binding)	Mm.10486	TC1602808	ENSMUST00000042808	111.345	37.2486	75.8268	162.757	95.45	19.8843	53.0322	38.8292
BC080756	0.00560109	0.165148	2.4079	up	BC080756	H2-K1	H-2K,H-2K(d),H2-K,MGC184092,MGC7052	Mus musculus histocompatibility 2, K1, K region, mRNA (cDNA clone MGC:91227 IMAGE:4947189), complete cds.	14972	chr17	34132978	34134700	GO:0006952(defense response);GO:0006955(immune response);GO:0019882(antigen processing and presentation);GO:0019883(antigen processing and presentation of endogenous antigen);GO:0019885(antigen processing and presentation of endogenous peptide antigen via MHC class I)	GO:0009897(external side of plasma membrane);GO:0016020(membrane);GO:0016021(integral to membrane);GO:0042612(MHC class I protein complex)		Mm.422886///Mm.439675	TC1605666///TC1668572	ENSMUST00000087189///ENSMUST00000025181	703.088	291.123	642.277	591.933	875.056	231.016	322.966	319.386
BC080861	0.0014787	0.108613	2.42083	up	BC080861	Fam13a	AI462012,D430015B01Rik,FAM13A1,Precm1	Mus musculus RIKEN cDNA D430015B01 gene, mRNA (cDNA clone MGC:90575 IMAGE:30357292), complete cds.	58909	chr6	58883544	58974496				Mm.28813	TC1578243///TC1611568	ENSMUST00000041250///ENSMUST00000089860	1611.52	658.371	1973	1475.62	1385.94	627.681	701.474	645.96
BC085164	0.00019854	0.081556	2.20834	up	BC085164	B2m	Ly-m11,beta2-m,beta2m	Mus musculus beta-2 microglobulin, mRNA (cDNA clone MGC:99944 IMAGE:6846389), complete cds.	12010	chr2	121973467	121978609	GO:0006952(defense response);GO:0006955(immune response);GO:0006968(cellular defense response)	GO:0005615(extracellular space);GO:0005886(plasma membrane);GO:0005887(integral to plasma membrane);GO:0042612(MHC class I protein complex)	GO:0003823(antigen binding);GO:0005515(protein binding)	Mm.163	TC1598829///TC1603009	ENSMUST00000102476	8162.94	3701.14	8048.47	8701.17	7739.18	3775.65	3972.07	3355.68
BC085238	0.000448433	0.089091	2.3463	up	BC085238	Ccnb1	Ccnb1-rs1,Ccnb1-rs13,CycB1,Cycb-4,Cycb-5,Cycb1-rs1,MGC18763,MGC90915	Mus musculus cyclin B1, mRNA (cDNA clone MGC:103020 IMAGE:6337228), complete cds.	268697	chr13	101549521	101556437	GO:0000074(regulation of progression through cell cycle);GO:0000910(cytokinesis);GO:0006468(protein amino acid phosphorylation);GO:0007049(cell cycle);GO:0007067(mitosis);GO:0051301(cell division)	GO:0005634(nucleus)	GO:0005515(protein binding);GO:0016301(kinase activity);GO:0016538(cyclin-dependent protein kinase regulator activity)	Mm.260114	NP054739///TC1573329	ENSMUST00000072119	146.989	62.4163	162.606	150.749	127.613	66.4606	62.2722	58.5161
BC089022	0.00751758	0.180974	2.39066	up	BC089022	Krt18	CK18,K18,Krt1-18	Mus musculus keratin 18, mRNA (cDNA clone MGC:115784 IMAGE:30701486), complete cds.	16668	chr15	101858684	101862451	GO:0007010(cytoskeleton organization and biogenesis)	GO:0005739(mitochondrion);GO:0005882(intermediate filament)	GO:0005198(structural molecule activity);GO:0005200(structural constituent of cytoskeleton)	Mm.22479	TC1674411	ENSMUST00000023803	21232.8	8925.73	17284.3	25395.5	21018.7	9847.48	10221	6708.73
BC089605	0.0135177	0.212918	2.09402	up	BC089605	Rassf5	1300019G20Rik,AU042887,MGC107647,Maxp1,Nore1,Nore1A,Nore1B,Rapl	Mus musculus Ras association (RalGDS/AF-6) domain family 5, mRNA (cDNA clone MGC:107647 IMAGE:30121804), complete cds.	54354	chr1	133072986	133141755	GO:0006915(apoptosis);GO:0007049(cell cycle);GO:0007165(signal transduction);GO:0007218(neuropeptide signaling pathway);GO:0007242(intracellular signaling cascade);GO:0045786(negative regulation of progression through cell cycle)	GO:0005575(cellular_component);GO:0005874(microtubule)	GO:0005515(protein binding);GO:0008270(zinc ion binding);GO:0019992(diacylglycerol binding);GO:0042802(identical protein binding);GO:0046872(metal ion binding)	Mm.248291	NP738049	ENSMUST00000027688	257.563	121.6	256.164	322.092	194.432	116.142	144.692	103.966
BC089613	0.00147553	0.108613	3.48082	up	BC089613	Mup20	Gm12560,MGC103310,MGC107671,Mup24,OTTMUSG00000007485	Mus musculus predicted gene, OTTMUSG00000007485, mRNA (cDNA clone MGC:107671 IMAGE:6746470), complete cds.	381530	chr4	61711268	61715151							108.841	31.4338	124.718	88.9789	112.827	34.1068	36.047	24.1477
BC090388	0.000511909	0.0892687	3.49311	up	BC090388	Hspb1	27kDa,Hsp25	Mus musculus heat shock protein 1, mRNA (cDNA clone IMAGE:4981068), with apparent retained intron.	15507	chr5	136363928	136365431		GO:0005625(soluble fraction);GO:0005626(insoluble fraction);GO:0005634(nucleus);GO:0005737(cytoplasm);GO:0005886(plasma membrane);GO:0030018(Z disc);GO:0043292(contractile fiber)		Mm.439650	NP046743	ENSMUST00000007996///ENSMUST00000005077	9766.71	2769.04	8206.6	11908.8	9184.69	2869.77	2948.08	2489.27
BC090991	0.00637127	0.17145	5.58657	up	BC090991	Gm5797	EG545013	Mus musculus predicted gene, EG545013, mRNA (cDNA clone MGC:107316 IMAGE:6742820), complete cds.	545013	chr14	8156501	8164909							193.455	36.0799	250.23	192.61	137.526	19.366	47.8447	41.0291
BC092065	0.00195089	0.121207	4.95342	up	BC092065	Igh	MGC102661,MGC102662,MGC103226,MGC118125,MGC28019,MGC36307,MGC6486,MGC6522,MGC6529,MGC6628,MGC6740,MGC68276,MGC68378	Mus musculus immunoglobulin heavy chain complex, mRNA (cDNA clone MGC:102667 IMAGE:4207793), complete cds.	111507	chr12	114496926	114667344				Mm.390473///Mm.342177///Mm.430747	TC1707890///NP1489570///TC1586115///NP1216021///NP048004///NP590647	ENSMUST00000103412///ENSMUST00000103505///ENSMUST00000103452///ENSMUST00000103504///ENSMUST00000103501	140.324	27.6271	91.7037	160.138	169.129	30.3557	30.3289	22.1966
BC092258	0.0278918	0.271461	3.50603	up	BC092258	Itih4	Itih-4	Mus musculus inter alpha-trypsin inhibitor, heavy chain 4, mRNA (cDNA clone MGC:102461 IMAGE:5125112), complete cds.	16427	chr14	31699698	31715035	GO:0030212(hyaluronan metabolic process)	GO:0005737(cytoplasm);GO:0005886(plasma membrane)	GO:0004867(serine-type endopeptidase inhibitor activity);GO:0005509(calcium ion binding);GO:0005540(hyaluronic acid binding)	Mm.34819	NP358746	ENSMUST00000006703	180.385	55.4428	135.258	171.377	234.519	26.023	61.5369	78.7686
BC094064	0.0432661	0.316262	2.45417	up	BC094064	Hsf1	AA960185	Mus musculus heat shock factor 1, mRNA (cDNA clone MGC:102664 IMAGE:4158683), complete cds.	15499	chr15	76307864	76331402	GO:0006350(transcription);GO:0006355(regulation of transcription, DNA-dependent);GO:0007283(spermatogenesis);GO:0008285(negative regulation of cell proliferation)	GO:0005634(nucleus);GO:0005737(cytoplasm);GO:0045120(pronucleus)	GO:0003677(DNA binding);GO:0003700(transcription factor activity)	Mm.347444	NP1487334///TC1608106	ENSMUST00000072838	155.01	64.4845	170.073	193.485	101.473	95.0547	55.8364	42.5624
BC094362	0.0164206	0.226544	2.25134	up	BC094362	Ntn3	Ntn2l	Mus musculus netrin 2-like (chicken), mRNA (cDNA clone MGC:106527 IMAGE:6830466), complete cds.	18209	chr17	24340790	24346332	GO:0007409(axonogenesis);GO:0007520(myoblast fusion);GO:0045449(regulation of transcription)	GO:0005576(extracellular region);GO:0005578(proteinaceous extracellular matrix);GO:0005794(Golgi apparatus)	GO:0005102(receptor binding);GO:0030528(transcription regulator activity)	Mm.259542	TC1584644	ENSMUST00000024931	510.49	226.097	551.006	372.731	607.734	168.406	261.676	248.21
BC096377	0.00772629	0.182932	2.15027	up	BC096377	Vegfc	AW228853,VEGF-C	Mus musculus vascular endothelial growth factor C, mRNA (cDNA clone MGC:106380 IMAGE:5002720), complete cds.	22341	chr8	55162980	55271805	GO:0000074(regulation of progression through cell cycle);GO:0001525(angiogenesis);GO:0007275(multicellular organismal development);GO:0008283(cell proliferation);GO:0008284(positive regulation of cell proliferation);GO:0009887(organ morphogenesis);GO:0016331(morphogenesis of embryonic epithelium);GO:0030154(cell differentiation)	GO:0005615(extracellular space);GO:0016020(membrane)	GO:0008083(growth factor activity)	Mm.1402	TC1674337	ENSMUST00000033919	509.221	236.31	433.473	466.708	627.483	278.63	193.596	236.705
BC096416	0.00788909	0.184095	2.49986	up	BC096416	N/A	N/A	Mus musculus cDNA clone IMAGE:3369166.	N/A	chr14	3208496	3222033							150.888	60.1067	175.855	111.897	164.912	74.0365	57.4309	48.8527
BC096427	0.0284011	0.272551	2.34313	up	BC096427	Inca1	AI842396	Mus musculus expressed sequence AI842396, mRNA (cDNA clone MGC:106026 IMAGE:4160694), complete cds.	103844	chr11	70501862	70513611				Mm.101581	TC1596220	ENSMUST00000073625	94.1246	41.1052	111.068	70.3342	100.971	47.0193	50.4469	25.8495
BC096435	0.00277906	0.13031	2.54337	up	BC096435	Cd74	CLIP,DHLAG,HLADG,Ia-GAMMA,Ii	Mus musculus CD74 antigen (invariant polypeptide of major histocompatibility complex, class II antigen-associated), mRNA (cDNA clone MGC:106056 IMAGE:6530802), complete cds.	16149	chr18	60963509	60972306	GO:0001516(prostaglandin biosynthetic process);GO:0006457(protein folding);GO:0006461(protein complex assembly);GO:0006886(intracellular protein transport);GO:0006952(defense response);GO:0006955(immune response);GO:0008283(cell proliferation);GO:0016064(immunoglobulin mediated immune response);GO:0019882(antigen processing and presentation);GO:0019886(antigen processing and presentation of exoge…	GO:0005764(lysosome);GO:0005770(late endosome);GO:0005771(multivesicular body);GO:0005783(endoplasmic reticulum);GO:0005794(Golgi apparatus);GO:0005886(plasma membrane);GO:0005887(integral to plasma membrane);GO:0009897(external side of plasma membrane);GO:0016020(membrane);GO:0016021(integral to membrane)	GO:0005515(protein binding);GO:0019955(cytokine binding)	Mm.439737	TC1585360	ENSMUST00000097563	1256.64	503.103	1210.32	1206.53	1353.09	434.824	425.745	648.739
BC096453	0.00127469	0.106392	2.02748	up	BC096453	Wnk4	2010002J11Rik,PHA2B,Prkwnk4	Mus musculus WNK lysine deficient protein kinase 4, mRNA (cDNA clone MGC:106293 IMAGE:4234311), complete cds.	69847	chr11	101121924	101138723	GO:0006468(protein amino acid phosphorylation);GO:0006811(ion transport);GO:0006821(chloride transport);GO:0007243(protein kinase cascade);GO:0008104(protein localization);GO:0030644(chloride ion homeostasis);GO:0050794(regulation of cellular process)	GO:0005737(cytoplasm);GO:0005923(tight junction)	GO:0000166(nucleotide binding);GO:0004672(protein kinase activity);GO:0004674(protein serine/threonine kinase activity);GO:0005515(protein binding);GO:0005524(ATP binding);GO:0016301(kinase activity);GO:0016740(transferase activity)	Mm.23656	NP712264	ENSMUST00000103108	855.986	421.707	957.104	850.653	760.202	408.13	469.112	387.879
BC099463	0.00109325	0.104015	3.68386	up	BC099463	Hspb1	27kDa,Hsp25	Mus musculus heat shock protein 1, mRNA (cDNA clone MGC:117667 IMAGE:30848584), complete cds.	15507	chr5	136363893	136365428		GO:0005625(soluble fraction);GO:0005626(insoluble fraction);GO:0005634(nucleus);GO:0005737(cytoplasm);GO:0005886(plasma membrane);GO:0030018(Z disc);GO:0043292(contractile fiber)		Mm.439650	NP046743	ENSMUST00000007996///ENSMUST00000005077	4050.75	1087.56	3099.31	4881.95	4170.97	1240.18	1080.13	942.381
BC099486	0.0314971	0.282242	2.25923	up	BC099486	LOC100043371	MGC117729	Mus musculus RIKEN cDNA 6030426L16 gene, mRNA (cDNA clone MGC:117729 IMAGE:30937101), complete cds.	100043371	chr12	20457535	20465072							225.159	94.8347	259.535	284.249	131.692	96.3041	83.7867	104.413
BC099532	0.00827528	0.188021	2.37923	up	BC099532	Lilrb4	CD85K,Gp49b,HM18,ILT3,LIR-5,gp49	Mus musculus leukocyte immunoglobulin-like receptor, subfamily B, member 4, mRNA (cDNA clone MGC:118088 IMAGE:30749706), complete cds.	14728	chr10	51210811	51216302	GO:0006955(immune response)	GO:0016020(membrane);GO:0016021(integral to membrane)	GO:0004872(receptor activity)	Mm.34408	TC1572053	ENSMUST00000078778	162.479	69.7893	144.056	185.826	157.555	93.5738	60.2336	55.5605
BC099544	0.0104407	0.20027	2.65006	up	BC099544	N/A	N/A	Mus musculus cDNA clone IMAGE:30918621.	N/A	chr14	106505415	106535076							895.067	353.544	935.765	914.514	834.923	511.794	291.496	257.342
BC099613	0.000674207	0.0953124	2.70115	up	BC099613	2610019F03Rik	-	Mus musculus RIKEN cDNA 2610019F03 gene, mRNA (cDNA clone MGC:118662 IMAGE:30031671), complete cds.	72148	chr8	13952009	13974680				Mm.5727	TC1577182	ENSMUST00000062613	703.618	262.931	688.852	683.778	738.224	296.743	278.753	213.296
BC099952	0.0211287	0.244212	2.16829	up	BC099952	Cwc22	AA684037,AI173004,AL022752,B230213M24,MGC107219,MGC107450,MGC7531,mKIAA1604	Mus musculus cDNA sequence BC003993, mRNA (cDNA clone IMAGE:30021838), complete cds.	80744	chr2	77754483	77774779			GO:0003723(RNA binding)	Mm.288151	TC1737168	ENSMUST00000065889	6725.45	3106.73	8785.69	5506.4	5884.24	2518.74	4092.32	2709.13
BC099953	1.97618e-05	0.0586483	3.51703	up	BC099953	LOC627891	-	Mus musculus similar to zinc finger protein 91, mRNA (cDNA clone IMAGE:30097819).	627891	chr2	176455230	176792580							493.503	140.573	483.536	480.335	516.638	153.606	137.91	130.204
BC100303	0.00336264	0.137665	2.60686	up	BC100303	A530040E14Rik	-	Mus musculus RIKEN cDNA A530040E14 gene, mRNA (cDNA clone IMAGE:30931600).	621875	chr1	85102520	85110610							152.121	58.8309	179.389	133.862	143.113	48.5393	54.1556	73.7979
BC100328	0.0306323	0.27923	2.3137	up	BC100328	Kifc1	HSET,KNSL2,Kifc5a,Kifc5b,MGC76666	Mus musculus kinesin family member C1, mRNA (cDNA clone MGC:117605 IMAGE:30841951), complete cds.	16580	chr17	34012610	34027532	GO:0007017(microtubule-based process);GO:0007018(microtubule-based movement)	GO:0005871(kinesin complex);GO:0005874(microtubule);GO:0005875(microtubule associated complex)	GO:0000166(nucleotide binding);GO:0003774(motor activity);GO:0003777(microtubule motor activity);GO:0005524(ATP binding)	Mm.335713	NP378915	ENSMUST00000078961	130.054	59.4365	124.827	142.067	123.267	67.7005	76.5558	34.0533
BC100411	0.0180863	0.230911	2.4815	up	BC100411	Gm5935	EG546282,MGC118208	Mus musculus cDNA clone MGC:118208 IMAGE:30916114, complete cds.	546282	chrX	24330287	24352290							148.743	57.8514	120.122	215.734	110.371	70.4795	52.0801	50.9946
BC100412	0.0104397	0.20027	2.59332	up	BC100412	1700001E04Rik	-	Mus musculus RIKEN cDNA 1700001E04 gene, mRNA (cDNA clone MGC:118211 IMAGE:30916569), complete cds.	75438	chr14	3500819	3509240				Mm.368224	TC1582893///TC1678542///TC1779913	ENSMUST00000095970///ENSMUST00000096190///ENSMUST00000100916	98.0848	38.0529	119.822	74.9124	99.5202	39.5912	47.1015	27.4661
BC106787	0.016475	0.226544	2.20949	up	BC106787	Olfr1373	GA_x6K02T2QP88-3283154-3284089,MGC123567,MGC140881	Mus musculus olfactory receptor 1373, mRNA (cDNA clone MGC:123567 IMAGE:40041421), complete cds.	211472	chr11	51958094	51959030							359.812	164.545	294.703	446.816	337.917	218.057	146.01	129.567
BC106828	0.00617852	0.169828	2.07625	up	BC106828	Tnfrsf23	Dctrailr1,MGC123882,MGC123883,Tnfrh1,Tnfrsf1al1,mDcTrailr1,mSOB	Mus musculus tumor necrosis factor receptor superfamily, member 23, mRNA (cDNA clone MGC:123882 IMAGE:40044453), complete cds.	79201	chr7	150854397	150871763		GO:0016020(membrane)	GO:0004872(receptor activity);GO:0005515(protein binding);GO:0048503(GPI anchor binding)	Mm.290780	TC1584013	ENSMUST00000035742	131.692	64.4286	138.6	135.86	120.616	51.4789	61.0085	80.7985
BC108426	0.00219135	0.125352	4.06254	up	BC108426	Tgfb3	MGC118722,Tgfb-3	Mus musculus transforming growth factor, beta 3, mRNA (cDNA clone MGC:118722 IMAGE:6757707), complete cds.	21809	chr12	87397753	87419991	GO:0000074(regulation of progression through cell cycle);GO:0001701(in utero embryonic development);GO:0008283(cell proliferation);GO:0008285(negative regulation of cell proliferation);GO:0009790(embryonic development);GO:0009887(organ morphogenesis);GO:0016049(cell growth);GO:0040007(growth)	GO:0005615(extracellular space)	GO:0005160(transforming growth factor beta receptor binding);GO:0008083(growth factor activity)	Mm.3992	TC1575978	ENSMUST00000003687	711.597	178.512	730.682	828.343	575.764	147.457	145.009	243.069
BC108990	0.0112641	0.204852	2.16551	up	BC108990	Gbp1	5830475C06,Gbp-1,MGC124334,Mag-1,Mpa-1,Mpa1	Mus musculus guanylate nucleotide binding protein 1, mRNA (cDNA clone MGC:124334 IMAGE:40047769), complete cds.	14468	chr3	142163517	142281813	GO:0006955(immune response)	GO:0016020(membrane)	GO:0000166(nucleotide binding);GO:0003924(GTPase activity);GO:0005525(GTP binding)	Mm.24038	TC1588406	ENSMUST00000029936	210.998	98.7204	233.564	173.251	226.179	90.0603	78.3099	127.791
BC111443	0.00573312	0.166489	3.7307	up	BC111443	Ccl3	AI323804,G0S19-1,LD78alpha,MIP-1alpha,MIP1-(a),MIP1-alpha,Mip1a,Scya3	Mus musculus chemokine (C-C motif) ligand 3, mRNA (cDNA clone MGC:130461 IMAGE:40041119), complete cds.	20302	chr11	83461619	83462804	GO:0006935(chemotaxis);GO:0006954(inflammatory response);GO:0006955(immune response);GO:0007165(signal transduction)	GO:0005576(extracellular region);GO:0005615(extracellular space)	GO:0005125(cytokine activity);GO:0005515(protein binding);GO:0008009(chemokine activity)	Mm.1282	TC1578043	ENSMUST00000001008	113.444	30.398	90.1815	96.0869	154.063	20.9171	37.496	32.7809
BC115708	0.0254524	0.262757	2.73466	up	BC115708	Nap1l2	Bpx	Mus musculus nucleosome assembly protein 1-like 2, mRNA (cDNA clone MGC:141324 IMAGE:40058104), complete cds.	17954	chrX	100379870	100381704	GO:0006334(nucleosome assembly)	GO:0005634(nucleus)		Mm.439770	TC1582253		85.7576	31.7166	60.4722	116.011	80.7901	43.5148	20.3722	31.2628
BC115768	0.0106985	0.201099	4.11442	up	BC115768	Mpa2l	AI595338,GBP6	Mus musculus macrophage activation 2 like, mRNA (cDNA clone MGC:141497 IMAGE:40085916), complete cds.	100702	chr5	105644543	105722714	GO:0006955(immune response)		GO:0003924(GTPase activity);GO:0005525(GTP binding)	Mm.275893	TC1577091	ENSMUST00000050011	241.023	56.2004	247.278	340.085	135.706	75.1562	48.4163	45.0288
BC115856	0.00782975	0.183239	5.80898	up	BC115856	Gm5925	EG546185	Mus musculus similar to Germ cell-less protein-like 2 (mGclh), mRNA (cDNA clone MGC:141290 IMAGE:40057635), complete cds.	546185	chrX	4220014	4221715							176.889	33.9666	207.373	150.333	172.961	28.5461	17.1431	56.2107
BC115962	0.0150399	0.219277	4.33305	up	BC115962	Gm2933	MGC141289	Mus musculus germ cell-less homolog 1 (Drosophila)-like, mRNA (cDNA clone MGC:141289 IMAGE:40057634), complete cds.	100040732	chrX	3241896	3243597							225.462	56.9677	212.897	281.061	182.426	27.8546	88.8061	54.2423
BC117010	0.0350785	0.293102	2.11266	up	BC117010	Hist1h4k	-	Mus musculus histone cluster 1, H4k, mRNA (cDNA clone MGC:151387 IMAGE:40126329), complete cds.	319160	chr13	21842010	21842422							67.0417	32.0456	62.7387	87.2446	51.1417	25.0119	44.3824	26.7426
BC117498	0.0295881	0.27633	2.08471	up	BC117498	Ppm1j	2310008J22Rik,MGC144853,PP2Czeta,Ppp2cz	Mus musculus protein phosphatase 1J, mRNA (cDNA clone MGC:144853 IMAGE:40106734), complete cds.	71887	chr3	104583977	104588845	GO:0006470(protein amino acid dephosphorylation)		GO:0003824(catalytic activity);GO:0005515(protein binding);GO:0015071(protein phosphatase type 2C activity)	Mm.379204	NP662950	ENSMUST00000002298	165.195	80.1747	169.473	125.793	200.32	102.694	81.5424	56.2882
BC117726	0.00394369	0.146636	3.88249	up	BC117726	4930408F14Rik	-	Mus musculus RIKEN cDNA 4930408F14 gene, mRNA (cDNA clone MGC:143459 IMAGE:40089629), complete cds.	74851	chrX	3546313	3547091	GO:0007276(gamete generation)			Mm.307966	NP742578		311.411	82.3171	314.734	247.66	371.838	116.596	64.413	65.9426
BC117727	0.00458851	0.155724	4.59356	up	BC117727	4930408F14Rik	-	Mus musculus RIKEN cDNA 4930408F14 gene, mRNA (cDNA clone MGC:143460 IMAGE:40089638), complete cds.	74851	chrX	31060181	31060959	GO:0007276(gamete generation)			Mm.307966	NP742578		220.625	49.6393	223.63	267.839	170.407	65.3201	53.4191	30.1786
BC117797	0.0216354	0.246956	2.51723	up	BC117797	Il1rl2	AI481289,AW551444,IL-1Rrp2	Mus musculus interleukin 1 receptor-like 2, mRNA (cDNA clone MGC:143689 IMAGE:40092208), complete cds.	107527	chr1	40381474	40422313		GO:0016020(membrane);GO:0016021(integral to membrane)	GO:0004872(receptor activity);GO:0004888(transmembrane receptor activity);GO:0004907(interleukin receptor activity);GO:0004908(interleukin-1 receptor activity);GO:0004909(interleukin-1, Type I, activating receptor activity)	Mm.155583	TC1604310///TC1590842	ENSMUST00000095020	85.7493	35.7893	82.4964	73.541	101.211	53.8551	25.7107	27.8022
BC117913	0.0400114	0.306983	2.32225	up	BC117913	Tlr13	AI666735,Gm713	Mus musculus toll-like receptor 13, mRNA (cDNA clone MGC:144069 IMAGE:40097310), complete cds.	279572	chrX	103342782	103355307							124.773	50.8837	166.652	69.9203	137.745	56.652	41.5449	54.4542
BC117979	0.0156604	0.223112	4.22688	up	BC117979	Tnc	AI528729,C130033P17Rik,Hxb,MGC144208,MGC144209,TN,TN-C,Ten,cytotactin,tenascin-C	Mus musculus tenascin C, mRNA (cDNA clone MGC:144208 IMAGE:40099589), complete cds.	21923	chr4	63621297	63681750	GO:0007155(cell adhesion);GO:0007165(signal transduction);GO:0007528(neuromuscular junction development)	GO:0005576(extracellular region);GO:0005578(proteinaceous extracellular matrix);GO:0005604(basement membrane);GO:0005615(extracellular space);GO:0016020(membrane);GO:0016021(integral to membrane)	GO:0005102(receptor binding);GO:0005515(protein binding)	Mm.980	TC1635844///TC1588200///TC1573025	ENSMUST00000030056	199.055	52.6637	210.179	169.57	217.417	47.0742	85.3912	25.5257
BC119023	0.00167063	0.113442	2.13197	up	BC119023	Gtl3	2600014O15Rik,AL024127,T10-2A2	Mus musculus gene trap locus 3, mRNA (cDNA clone MGC:155339 IMAGE:8733772), complete cds.	14894	chr8	97944302	97958665				Mm.2080	TC1602789		7227.38	3394.12	8209.54	6716.33	6756.27	3527.04	3744.61	2910.7
BC119511	0.000171827	0.0766675	8.05644	up	BC119511	Cxcl2	CINC-2a,GROb,Gro2,MIP-2,MIP-2a,Mgsa-b,Mip2,Scyb,Scyb2	Mus musculus chemokine (C-X-C motif) ligand 2, mRNA (cDNA clone MGC:141145 IMAGE:40055368), complete cds.	20310	chr5	91332950	91334602	GO:0006935(chemotaxis);GO:0006954(inflammatory response);GO:0006955(immune response);GO:0007165(signal transduction)	GO:0005576(extracellular region);GO:0005615(extracellular space)	GO:0005125(cytokine activity);GO:0008009(chemokine activity)	Mm.4979	TC1585434		197.586	25.0015	202.5	181.263	208.995	30.4	26.151	18.4534
BC120554	0.00488332	0.157772	2.83908	up	BC120554	H2-Q7	H-2Q7,Ped,Q9,Qa-2,Qa-7,Qa7	Mus musculus histocompatibility 2, Q region locus 7, mRNA (cDNA clone MGC:155791 IMAGE:40129477), complete cds.	15018	chr17	35576099	35580494	GO:0006952(defense response);GO:0006955(immune response);GO:0019882(antigen processing and presentation)	GO:0005886(plasma membrane);GO:0016020(membrane);GO:0016021(integral to membrane);GO:0042612(MHC class I protein complex)		Mm.439743	TC1578330	ENSMUST00000071951	160.319	54.8716	210.496	156.805	113.656	49.5216	58.683	56.4101
BC120721	0.029277	0.275412	4.53759	up	BC120721	Ccdc83	4930549K11Rik,4930554C01Rik,4932423M01Rik	Mus musculus coiled-coil domain containing 83, mRNA (cDNA clone MGC:155958 IMAGE:40129644), complete cds.	75338	chr7	97384637	97413916				Mm.160714	TC1593766///TC1594540	ENSMUST00000040413	175.667	36.3974	301.912	85.7952	139.294	31.4121	55.713	22.0671
BC125459	0.0307582	0.279983	3.85346	up	BC125459	V1rf4	MGC159162,MGC159164	Mus musculus vomeronasal 1 receptor, F4, mRNA (cDNA clone MGC:159162 IMAGE:40129974), complete cds.	171235	chr17	21423496	21424617	GO:0007186(G-protein coupled receptor protein signaling pathway);GO:0019236(response to pheromone)	GO:0005887(integral to plasma membrane);GO:0016021(integral to membrane)	GO:0001584(rhodopsin-like receptor activity);GO:0004872(receptor activity);GO:0005550(pheromone binding);GO:0016503(pheromone receptor activity)	Mm.432089	NP496265	ENSMUST00000066998	139.939	30.8327	82.7069	75.258	261.852	26.322	29.5258	36.6502
BC127994	0.0349871	0.292648	2.94365	up	BC127994	Olfr1170	MGC157568,MOR174-12	Mus musculus olfactory receptor 1170, mRNA (cDNA clone MGC:157568 IMAGE:40135743), complete cds.	258525	chr2	88064236	88065187	GO:0007165(signal transduction);GO:0007186(G-protein coupled receptor protein signaling pathway);GO:0007608(sensory perception of smell);GO:0050896(response to stimulus)	GO:0016020(membrane);GO:0016021(integral to membrane)	GO:0004871(signal transducer activity);GO:0004872(receptor activity);GO:0004930(G-protein coupled receptor activity);GO:0004984(olfactory receptor activity)	Mm.377552		ENSMUST00000099831	285.501	109.951	267.608	295.498	293.398	192.262	67.4949	70.0955
BC128080	0.0349952	0.292648	3.24752	up	BC128080	Fa2h	FAAH,Faxdc1,G630055L08Rik	Mus musculus fatty acid 2-hydroxylase, mRNA (cDNA clone MGC:148207 IMAGE:40104374), complete cds.	338521	chr8	113870242	113917702	GO:0008152(metabolic process)		GO:0003824(catalytic activity);GO:0005506(iron ion binding);GO:0020037(heme binding);GO:0046872(metal ion binding);GO:0046914(transition metal ion binding)	Mm.41083	TC1580906	ENSMUST00000038475	177.214	56.1495	123.881	265.481	142.278	31.8163	87.6287	49.0034
BC132163	0.000119891	0.0713968	2.74673	up	BC132163	H2-Eb1	H-2Eb,H2Eb,Ia-4,Ia4,MGC163794,MGC163796	Mus musculus cDNA clone MGC:163794 IMAGE:40130440, complete cds.	14969	chr17	34442861	34453040	GO:0006955(immune response);GO:0019882(antigen processing and presentation);GO:0019886(antigen processing and presentation of exogenous peptide antigen via MHC class II)	GO:0016020(membrane);GO:0016021(integral to membrane);GO:0042613(MHC class II protein complex)	GO:0005515(protein binding)	Mm.22564	TC1571946		3093.36	1128.5	2982.8	3321.4	2975.87	1079.24	1046	1260.27
BC132328	0.0269365	0.268244	2.58979	up	BC132328	Lgals3	GBP,L-34,Mac-2,gal3	Mus musculus lectin, galactose binding, soluble 3, mRNA (cDNA clone MGC:163959 IMAGE:40130605), complete cds.	16854	chr14	47993608	48005763	GO:0001501(skeletal development);GO:0030198(extracellular matrix organization and biogenesis)	GO:0005578(proteinaceous extracellular matrix);GO:0005634(nucleus);GO:0005737(cytoplasm)	GO:0005515(protein binding);GO:0005529(sugar binding);GO:0019863(IgE binding)	Mm.248615	TC1679933	ENSMUST00000022388	96.5581	38.651	82.8554	80.2969	126.522	32.3248	57.6009	26.0273
BC132376	0.021202	0.244652	4.42698	up	BC132376	Cldn4	Cep-r,Cpetr,Cpetr1	Mus musculus claudin 4, mRNA (cDNA clone MGC:164007 IMAGE:40130653), complete cds.	12740	chr5	135421560	135422731	GO:0016338(calcium-independent cell-cell adhesion)	GO:0005615(extracellular space);GO:0005923(tight junction);GO:0016020(membrane);GO:0016021(integral to membrane)	GO:0005198(structural molecule activity);GO:0042802(identical protein binding)	Mm.7339	TC1578697		189.734	49.3364	208.759	143.31	217.134	28.9673	28.5695	90.4724
BC132557	0.00187983	0.119829	2.47074	up	BC132557	Igtp	AW558444,Irgm3,MGC102455,MGC5712	Mus musculus interferon gamma induced GTPase, mRNA (cDNA clone MGC:164188 IMAGE:40130834), complete cds.	16145	chr11	58015115	58020825		GO:0005829(cytosol)	GO:0003924(GTPase activity)	Mm.440768	TC1577058	ENSMUST00000035266	155.404	63.7883	155.595	161.406	149.211	76.2069	50.1507	65.0072
BC132612	0.0299312	0.277368	2.13792	up	BC132612	Krtap16-8	1110002D05Rik	Mus musculus keratin associated protein 16-8, mRNA (cDNA clone MGC:164243 IMAGE:40130889), complete cds.	68484	chr16	89047830	89048108		GO:0005882(intermediate filament)		Mm.46209	TC1587669		583.749	282.02	535.995	699.173	516.08	369.953	294.364	181.744
BC132647	0.000283575	0.089091	5.55041	up	BC132647	Serpina3h	6C28,spi2	Mus musculus serine (or cysteine) peptidase inhibitor, clade A, member 3H, mRNA (cDNA clone MGC:164278 IMAGE:40130924), complete cds.	546546	chr12	105452753	105491985							190.857	34.206	151.161	221.586	199.824	36.1532	28.5752	37.8895
BC140264	0.0460675	0.322909	2.4092	up	BC140264	V1ra2	V1RA9,V1r2,V1ra11,mV1R2	Synthetic construct Mus musculus clone IMAGE:100014227, MGC:173321 vomeronasal 1 receptor, A2 (V1ra2) mRNA, encodes complete protein.	22297	chr6	89883025	89883980	GO:0007165(signal transduction);GO:0007186(G-protein coupled receptor protein signaling pathway);GO:0019236(response to pheromone)	GO:0016020(membrane);GO:0016021(integral to membrane)	GO:0001584(rhodopsin-like receptor activity);GO:0004871(signal transducer activity);GO:0004872(receptor activity);GO:0004930(G-protein coupled receptor activity);GO:0016503(pheromone receptor activity)	Mm.431981	TC1590979	ENSMUST00000054202	110.872	50.3161	116.31	111.433	104.874	76.6983	47.6569	26.5931
BC141457	0.0234489	0.255079	2.10702	up	BC141457	Sprr2i	-	Synthetic construct Mus musculus clone IMAGE:100014717, MGC:175495 small proline-rich protein 2I (Sprr2i) mRNA, encodes complete protein.	20763	chr3	92212633	92212866							327.546	160.472	359.213	342.387	281.038	157.911	109.179	214.327
BC141529	0.0494194	0.332015	2.53118	up	BC141529	Otop2	4732464P15	Synthetic construct Mus musculus clone IMAGE:100014558, MGC:175421 otopetrin 2 (Otop2) mRNA, encodes complete protein.	237987	chr11	115184726	115193297				Mm.44542	TC1592220	ENSMUST00000055490	130.54	54.0788	175.989	117.923	97.7082	51.2891	80.76	30.1872
BC145673	0.00366429	0.142162	2.93051	up	BC145673	D14Ertd668e	MGC29273	Mus musculus DNA segment, Chr 14, ERATO Doi 668, expressed, mRNA (cDNA clone MGC:175560 IMAGE:40130976), complete cds.	219132	chr14	59967568	59984280			GO:0005515(protein binding);GO:0008270(zinc ion binding)	Mm.205022	TC1651122		306.828	102.338	233.379	406.771	280.334	116.3	94.655	96.0578
BC145978	0.0271934	0.269116	2.1564	up	BC145978	Herc3	5730409F18Rik,AI646603,MGC30404,mKIAA0032	Mus musculus hect domain and RLD 3, mRNA (cDNA clone MGC:175865 IMAGE:40131281), complete cds.	73998	chr6	58783693	58869324	GO:0006464(protein modification process);GO:0006512(ubiquitin cycle);GO:0008150(biological_process)	GO:0005575(cellular_component);GO:0005622(intracellular)	GO:0003674(molecular_function);GO:0004842(ubiquitin-protein ligase activity)	Mm.191892	TC1575789///TC1589815	ENSMUST00000041401///ENSMUST00000031823	493.362	239.437	494.276	517.097	468.713	301.972	269.574	146.764
BC148336	0.0282643	0.272351	2.19485	up	BC148336	Krtap5-4	-	Synthetic construct Mus musculus clone IMAGE:100015278, MGC:183228 keratin associated protein 5-4 (Krtap5-4) mRNA, encodes complete protein.	50775	chr7	149489496	149490169	GO:0008150(biological_process)	GO:0005575(cellular_component);GO:0045095(keratin filament)	GO:0003674(molecular_function)	Mm.389990	TC1713312	ENSMUST00000061403	913.276	425.07	742.824	1140.56	856.447	560.654	284.867	429.688
BC148490	0.0331736	0.288469	2.71637	up	BC148490	Sprr2k	-	Synthetic construct Mus musculus clone IMAGE:100015407, MGC:183283 small proline-rich protein 2K (Sprr2k) mRNA, encodes complete protein.	20765	chr3	92237266	92237471	GO:0007566(embryo implantation);GO:0008544(epidermis development);GO:0030216(keratinocyte differentiation);GO:0031424(keratinization);GO:0042698(menstrual cycle)	GO:0001533(cornified envelope)	GO:0005198(structural molecule activity)	Mm.57085	TC1595507	ENSMUST00000067102	174.448	69.2247	154.403	203.427	165.513	77.4795	94.9302	35.2645
BC148547	0.0428204	0.314914	2.88744	up	BC148547	Bst1	114/A10,A530073F09,BP-3,Bp3,Bsta1,CD157,Ly65	Synthetic construct Mus musculus clone IMAGE:100015463, MGC:183310 bone marrow stromal cell antigen 1 (Bst1) mRNA, encodes complete protein.	12182	chr5	44210165	44233339	GO:0006952(defense response)	GO:0005615(extracellular space);GO:0005886(plasma membrane);GO:0016020(membrane)	GO:0003953(NAD+ nucleosidase activity);GO:0016787(hydrolase activity);GO:0048503(GPI anchor binding)	Mm.246332	TC1582441	ENSMUST00000030962	162.182	61.1063	163.942	116.824	205.78	43.1858	103.509	36.6236
BC148645	0.00226228	0.125352	2.32343	up	BC148645	Sfn	Er,Mme1,Ywhas	Synthetic construct Mus musculus clone IMAGE:100015643, MGC:183388 stratifin (Sfn) mRNA, encodes complete protein.	55948	chr4	133156939	133157685	GO:0000074(regulation of progression through cell cycle);GO:0000079(regulation of cyclin-dependent protein kinase activity);GO:0030216(keratinocyte differentiation)	GO:0005737(cytoplasm)	GO:0019904(protein domain specific binding)	Mm.44482	TC1608089///TC1695351	ENSMUST00000057311	328.118	142.155	296.038	320.942	367.373	165.306	115.869	145.291
BC152716	0.0154832	0.222083	2.18885	up	BC152716	Ppnr	mp41	Synthetic construct Mus musculus clone IMAGE:100015936, MGC:184340 per-pentamer repeat gene (Ppnr) mRNA, encodes complete protein.	26930	chr19	55920396	55920796				Mm.439757	TC1591952		88.7246	40.0004	85.2851	114.826	66.063	49.0161	34.4329	36.5521
BC152799	0.028851	0.273693	2.59659	up	BC152799	Entpd8	-	Synthetic construct Mus musculus clone IMAGE:100016019, MGC:184407 ectonucleoside triphosphate diphosphohydrolase 8 (Entpd8) mRNA, encodes complete protein.	72090	chr2	24937337	24940670	GO:0009124(nucleoside monophosphate biosynthetic process);GO:0009133(nucleoside diphosphate biosynthetic process)	GO:0005624(membrane fraction)	GO:0016787(hydrolase activity);GO:0017110(nucleoside-diphosphatase activity);GO:0017111(nucleoside-triphosphatase activity)	Mm.33403	TC1585469	ENSMUST00000044078	123.225	45.595	118.695	176.372	74.6089	36.0048	58.2179	42.5624
BC152827	0.0191063	0.235333	2.00336	up	BC152827	AY761184	CRS1C-3,CRS1C-6	Synthetic construct Mus musculus clone IMAGE:100016071, MGC:184377 cDNA sequence AY761184 (AY761184) mRNA, encodes complete protein.	382000	chr8	22813101	22814075							465.06	236.417	405.69	538.823	450.666	257.143	284.813	167.294
BC156265	0.0112805	0.204861	2.53387	up	BC156265	Usp32	2900074J03Rik,6430526O11Rik,AW045245	Synthetic construct Mus musculus clone IMAGE:100061718, MGC:190284 ubiquitin specific peptidase 32 (Usp32) mRNA, encodes complete protein.	237898	chr11	84799913	84953271	GO:0006511(ubiquitin-dependent protein catabolic process);GO:0006512(ubiquitin cycle)		GO:0004221(ubiquitin thiolesterase activity);GO:0005509(calcium ion binding);GO:0008233(peptidase activity)	Mm.178524	TC1660113///TC1700697	ENSMUST00000000821	640.607	258.205	602.654	770.061	549.105	174.132	286.401	314.082
BC156320	0.00457164	0.155724	2.32774	up	BC156320	Znrf2	1190002C14Rik,AU044205,D6Ertd365e,MGC129274,MGC129275	Synthetic construct Mus musculus clone IMAGE:100061791, MGC:190292 zinc and ring finger 2 (Znrf2) mRNA, encodes complete protein.	387524	chr6	54767008	54834814	GO:0006512(ubiquitin cycle);GO:0008150(biological_process)	GO:0005575(cellular_component);GO:0016020(membrane)	GO:0003674(molecular_function);GO:0005515(protein binding);GO:0008270(zinc ion binding);GO:0016874(ligase activity);GO:0046872(metal ion binding)	Mm.286149	TC1685356	ENSMUST00000079869	2133.26	935.647	2140.97	2139.31	2119.51	999.616	1119.58	687.741
BC156697	0.0183857	0.23244	2.8433	up	BC156697	Arhgef6	1600028C08Rik,1700038J06Rik,4930592P22Rik,alpha-PIX	Synthetic construct Mus musculus clone IMAGE:100062134, MGC:190377 Rac/Cdc42 guanine nucleotide exchange factor (GEF) 6 (Arhgef6) mRNA, encodes complete protein.	73341	chrX	54486687	54591680	GO:0007242(intracellular signaling cascade);GO:0008150(biological_process);GO:0035023(regulation of Rho protein signal transduction)	GO:0005575(cellular_component);GO:0005622(intracellular)	GO:0003674(molecular_function);GO:0005085(guanyl-nucleotide exchange factor activity);GO:0005089(Rho guanyl-nucleotide exchange factor activity)	Mm.261443	NP741729///TC1580901///TC1617839///TC1599616	ENSMUST00000033468	104.737	36.8703	146.746	80.5214	86.9438	25.4662	50.1471	34.9977
BC156773	0.00236219	0.126375	2.68083	up	BC156773	Hba-a2	-	Synthetic construct Mus musculus clone IMAGE:100062289, MGC:190450 hemoglobin alpha, adult chain 2 (Hba-a2) mRNA, encodes complete protein.	110257	chr11	32183703	32184394	GO:0006810(transport);GO:0015671(oxygen transport)		GO:0005344(oxygen transporter activity);GO:0005506(iron ion binding);GO:0046872(metal ion binding)	Mm.196110			21641.5	8185.18	19466.5	23693.6	21764.5	9925.88	6307.38	8322.27
CT010181	0.0334941	0.289268	2.4932	up	CT010181	ENSMUSG00000068790	-	Mus musculus full open reading frame cDNA clone RZPDo836C0450D for gene 2610042L04Rik, RIKEN cDNA 2610042L04 gene; complete cds, incl. stopcodon.	545007	chr14	4301223	4619865							560.424	237.731	517.705	490.608	672.957	307.63	275.372	130.192
D29763	0.0478927	0.327801	3.23251	up	D29763	Sez6	BSRP-C,D11Bhm177e,KIAA4158,mKIAA4158,sez-6	Mus musculus domesticus mRNA for seizure-related gene product 6 precursor, complete cds.	20370	chr11	77744444	77792542		GO:0005615(extracellular space);GO:0016021(integral to membrane)		Mm.229330	TC1591543///NP051095	ENSMUST00000000646	131.538	40.6344	75.6054	204.357	114.651	43.8454	57.1157	20.942
EF494423	0.00204998	0.123375	4.93199	up	EF494423	Gbp4	AW228052,KIAA4245,Mag-2,Mpa-2,Mpa2,mKIAA4245	alt 'AW228052#KIAA4245#Mag-2#Mpa-2#Mpa2#mKIAA4245'	17472	chr5	105544785	105568571	GO:0006955(immune response)		GO:0003924(GTPase activity);GO:0005525(GTP binding)	Mm.440525	TC1580160	ENSMUST00000072396	544.135	114.654	487.474	608.836	536.094	128.232	143.815	71.9161
EF651802	0.00492686	0.158103	2.66631	up	EF651802	Gm10014	ENSMUSG00000056940	Mus musculus alpha5-takusan mRNA, complete cds.	100042149	chr14	3773193	4069555							596.342	221.682	743.062	588.854	457.112	260.047	181.774	223.224
EF651803	0.0140416	0.216299	2.04432	up	EF651803	100039441	-	Mus musculus alpha6-takusan mRNA, complete cds.	100039441	chr14	4534030	4772827							282.591	138.676	338.326	281.059	228.387	145.29	106.572	164.165
EF651820	0.00661225	0.173518	2.74203	up	EF651820	Gm3264	-	Mus musculus alpha23-takusan mRNA, complete cds.	100041306	chr14	4534030	4622491							489.345	174.315	332.451	570.796	564.787	202.417	161.93	158.599
EF651823	0.035444	0.29422	2.28951	up	EF651823	ENSMUSG00000072735	-	Mus musculus alpha26-takusan mRNA, complete cds.	100041151	chr14	7242024	7244092							362.094	167.694	322.072	341.579	422.631	253.555	141.691	107.835
EF651834	0.0153305	0.220954	2.59058	up	EF651834	ENSMUSG00000072735	-	Mus musculus alpha37-takusan mRNA, complete cds.	100041151	chr14	7569255	7573944							217.681	87.5774	223.177	247.211	182.656	127.425	72.9554	62.3514
EF651835	0.0120405	0.207499	2.44524	up	EF651835	ENSMUSG00000079376	-	Mus musculus alpha38-takusan mRNA, complete cds.	545001	chr14	5545503	5551837							328.758	139.582	347.386	337	301.89	137.89	187.224	93.633
EF651836	0.000471464	0.089091	2.63418	up	EF651836	ENSMUSG00000079376	-	Mus musculus alpha39-takusan mRNA, complete cds.	545001	chr14	7571875	7707674							355.014	135.196	319.408	374.485	371.148	147.181	143.034	115.371
EF651840	0.00513821	0.160811	3.04297	up	EF651840	Gm3642	-	Mus musculus alpha43-takusan mRNA, complete cds.	100042054	chr14	8059639	8060807							196.079	66.6994	190.646	183.855	213.735	87.0116	68.4366	44.6501
J00407	0.00668485	0.173681	2.19601	up	J00407	H2-D1	H-2D,H2-D	Mouse MHC class I H2 gene (haplotype d), mRNA, clone pH-2II.	14964	chr17	35400972	35403825	GO:0006955(immune response);GO:0019882(antigen processing and presentation)	GO:0005886(plasma membrane);GO:0009897(external side of plasma membrane);GO:0016020(membrane);GO:0016021(integral to membrane);GO:0042612(MHC class I protein complex)	GO:0005515(protein binding)	Mm.439675///Mm.440607	TC1574671	ENSMUST00000078966///ENSMUST00000074806	2026.19	929.043	1828.78	2395.87	1853.92	1045.37	1027.99	713.764
J03636	0.0042342	0.150412	2.15483	up	J03636	Ly6a	Ly-6A.2,Ly-6A/E,Ly-6E.1,Sca-1,Sca1,TAP	Mouse T-cell-activating protein (TAP) mRNA, complete cds.	110454	chr15	74825306	74828318		GO:0009897(external side of plasma membrane);GO:0016020(membrane)	GO:0048503(GPI anchor binding)	Mm.425949	TC1574140	ENSMUST00000023248	551.252	257.711	592.152	584.35	477.254	304.527	207.863	260.745
M55219	0.0307229	0.279858	2.67485	up	M55219	N/A	N/A	Mouse HSR mRNA, clone pMmHSRc-[1,3,3E,10 and 10E].	N/A	chr1	87432843	87447339							64.5483	22.2674	93.2999	66.4505	33.8945	23.3718	20.3938	23.0366
M55544	0.00638092	0.17145	2.1685	up	M55544	Gbp1	5830475C06,Gbp-1,MGC124334,Mag-1,Mpa-1,Mpa1	Mouse guanylate binding protein isoform I (GBP-1) mRNA, complet cds.	14468	chr3	142164225	142282140	GO:0006955(immune response)	GO:0016020(membrane)	GO:0000166(nucleotide binding);GO:0003924(GTPase activity);GO:0005525(GTP binding)	Mm.24038	TC1588406	ENSMUST00000029936	174.965	79.2599	212.804	180.842	131.247	78.9929	85.1229	73.6638
M60978	0.0410888	0.310306	2.41892	up	M60978	Gapdhs	Gapd-s,Gapds	Mus musculus testis-specific isoform of glyceraldehyde 3-phosphate dehydrogenase (Gapd-S) mRNA, complete cds.	14447	chr7	31514798	31528700	GO:0006006(glucose metabolic process);GO:0006096(glycolysis);GO:0030317(sperm motility);GO:0045821(positive regulation of glycolysis)	GO:0009434(microtubule-based flagellum)	GO:0004365(glyceraldehyde-3-phosphate dehydrogenase (phosphorylating) activity);GO:0008943(glyceraldehyde-3-phosphate dehydrogenase activity);GO:0016491(oxidoreductase activity);GO:0051287(NAD binding)	Mm.436562	TC1586023	ENSMUST00000074758	119.071	46.6447	166.876	66.4352	123.902	44.6835	57.4309	37.8197
NM_001012766	0.0174196	0.228486	2.82135	up	NM_001012766	Ear12	-	Mus musculus eosinophil-associated, ribonuclease A family, member 12 (Ear12), mRNA.	503845	chr14	44680551	44681022							72.0972	23.8266	44.9878	110.283	61.0204	24.1477	25.0188	22.3134
NM_001025208	0.0391895	0.304926	2.04106	up	NM_001025208	LOC547349	-	Mus musculus similar to MHC class I antigen precursor (LOC547349), mRNA.	547349	chr17	35402723	35462354							1440.27	676.73	1839.73	1598.88	882.199	600.142	767.268	662.779
NM_001081558	0.0240277	0.2578	2.08434	up	NM_001081558	N/A	N/A	Mus musculus calmodulin binding transcription activator 1 (Camta1), transcript variant 2, mRNA.	N/A	chr4	150433634	151235855							198.05	95.2858	146.061	222.032	226.057	118.215	70.495	97.1474
NM_001085518	0.0311423	0.281892	2.75923	up	NM_001085518	Gm14085	OTTMUSG00000015615,Rp23-357i14.1	Mus musculus novel protein similar to solute carrier family 28 (sodium-coupled nucleoside transporter) member 2 (Slc28a2) (Rp23-357i14.1), mRNA.	381417	chr2	122310676	122353776							103.707	40.2932	117.85	110.475	82.796	59.4512	39.6718	21.7567
NM_001085523	0.0427691	0.314914	3.79338	up	NM_001085523	Gm14374	OTTMUSG00000016453	Mus musculus predicted gene, OTTMUSG00000016453 (OTTMUSG00000016453), mRNA.	434725	chrX	5246184	5248144							246.626	80.05	287.29	217.928	234.661	37.8641	45.272	157.014
NM_001085543	0.0129815	0.211294	4.5003	up	NM_001085543	Gm14347	OTTMUSG00000016407	Mus musculus predicted gene, OTTMUSG00000016407 (OTTMUSG00000016407), mRNA.	627264	chrX	3907010	3908970							197.888	46.112	233.676	229.772	130.217	46.6291	24.4661	67.2408
NM_001099324	0.0368067	0.297942	2.20994	up	NM_001099324	Gm15217	OTTMUSG00000019524	Mus musculus hypothetical protein LOC100041724 (LOC100041724), mRNA.	100041724	chr14	46999141	47003281							136.579	62.9469	177.915	126.603	105.218	59.0874	42.6805	87.0727
NM_001099325	0.00345202	0.137665	3.16553	up	NM_001099325	Gm10488	ENSMUSG00000073257,MGC118207	Mus musculus novel protein similar to Xlr-related, meiosis regulated (Xmr) (LOC100042109), mRNA.	100042109	chrX	26799156	26822068							176.341	54.5737	180.55	222.772	125.699	56.652	46.2867	60.7825
NM_001099643	0.00774698	0.182932	5.60262	up	NM_001099643	Gm3750	-	Mus musculus mgclh-like (LOC100042254), mRNA.	100042254	chrX	3241669	3243629							323.743	63.6777	334.943	383.646	252.64	46.5166	107.653	36.8633
NM_001100183	0.0237784	0.256668	3.69955	up	NM_001100183	Cyp4a29	OTTMUSG00000008612	Mus musculus cytochrome P450, family 4, subfamily a, polypeptide 29 (Cyp4a29), mRNA.	230639	chr4	114914688	114927162				Mm.425202			104.481	25.1116	47.6003	165.412	100.432	26.4866	21.7953	27.0528
NM_001100445	0.0155766	0.222711	2.52301	up	NM_001100445	Gm2030	-	Mus musculus novel Xlr-related, meiosis regulated (Xmr) family member (LOC100039065), mRNA.	100039065	chrX	25714102	25737170							125.8	50.8047	105.792	160.474	111.134	43.2152	70.8077	38.3912
NM_001104541	0.0419834	0.312749	3.99384	up	NM_001104541	Vmn2r92	EG627111	Mus musculus vomeronasal 2, receptor 92 (Vmn2r92), mRNA.	627111	chr17	18288893	18322142							169.867	46.9414	234.534	168.54	106.528	18.5259	48.0618	74.2365
NM_001104946	0.0011637	0.106311	5.17159	up	NM_001104946	Gm2012	-	Mus musculus novel Xlr-related, meiosis regulated (Xmr) family member (LOC100039030), mRNA.	100039030	chrX	25627803	26362827							185.991	36.9566	210.386	189.419	158.169	30.6363	29.077	51.1566
NM_001105062	0.00492981	0.158103	3.05429	up	NM_001105062	Vmn2r31	-	Mus musculus vomeronasal 2, receptor 31 (Vmn2r31), mRNA.	100042591	chr7	7336695	7352338							115.544	39.1931	118.361	106.645	121.625	52.0847	38.9014	26.5931
NM_001105074	0.000566225	0.0939301	2.47038	up	NM_001105074	Vmn2r44	EG434113	Mus musculus vomeronasal 2, receptor 44 (Vmn2r44), mRNA.	434113	chr7	9744079	9759858							212.559	86.3722	231.358	196.411	209.907	100.167	79.5244	79.4255
NM_001105152	0.0048828	0.157772	2.39551	up	NM_001105152	Vmn2r48	EG625580	Mus musculus vomeronasal 2, receptor 48 (Vmn2r48), mRNA.	625580	chr7	10512972	10538934							125.131	53.0049	125.565	110.833	138.994	62.4939	39.4628	57.058
NM_001105178	0.0248334	0.260716	2.69025	up	NM_001105178	Vmn2r50	EG434117	Mus musculus vomeronasal 2, receptor 50 (Vmn2r50), mRNA.	434117	chr7	10622583	10638527							193.183	66.8409	172.169	113.548	293.833	73.2377	68.3405	58.9446
NM_001110209	0.0273954	0.270061	2.02978	up	NM_001110209	Lnp	2310011O18Rik,4921514L11Rik,9530051D01Rik,AI666268,Ul,ulnaless	Mus musculus limb and neural patterns (Lnp), transcript variant 2, mRNA.	69605	chr2	74352893	74417005	GO:0007275(multicellular organismal development)	GO:0016020(membrane);GO:0016021(integral to membrane)		Mm.156113	TC1580699///TC1668273	ENSMUST00000102676	387.612	192.695	384.712	475.85	302.274	188.626	248.019	141.44
NM_001111075	0.00928478	0.193931	2.98867	up	NM_001111075	Cdc25b	AI604853	Mus musculus cell division cycle 25 homolog B (S. pombe) (Cdc25b), transcript variant 2, mRNA.	12531	chr2	131012686	131024233	GO:0000087(M phase of mitotic cell cycle);GO:0001556(oocyte maturation);GO:0006470(protein amino acid dephosphorylation);GO:0007049(cell cycle);GO:0007067(mitosis);GO:0007144(female meiosis I);GO:0045860(positive regulation of protein kinase activity);GO:0051301(cell division)	GO:0005622(intracellular)	GO:0004721(phosphoprotein phosphatase activity);GO:0004725(protein tyrosine phosphatase activity);GO:0016787(hydrolase activity)	Mm.38444	TC1658725///TC1590426	ENSMUST00000028804	207.611	70.7757	262.037	190.772	170.023	47.3715	73.4448	91.5107
NM_019440	0.0107174	0.201099	3.31377	up	NM_019440	Irgm2	AI481100,GTPI,Iigp2,MGC102455	Mus musculus interferon inducible GTPase 2 (Iigp2), mRNA.	54396	chr11	58013057	58036277	GO:0008150(biological_process)	GO:0005575(cellular_component)	GO:0003924(GTPase activity)		TC1578644	ENSMUST00000094169	207.26	60.5343	302.253	178.869	140.657	56.1941	77.2977	48.111
NM_029441	0.01652	0.226544	2.43763	up	NM_029441	Cdyl2	1700029M19Rik,4930453I21Rik	Mus musculus chromodomain protein, Y chromosome-like 2 (Cdyl2), mRNA.	75796	chr8	119098299	119256891	GO:0006333(chromatin assembly or disassembly);GO:0008150(biological_process);GO:0008152(metabolic process)	GO:0000785(chromatin);GO:0005634(nucleus)	GO:0003674(molecular_function);GO:0003682(chromatin binding);GO:0003824(catalytic activity);GO:0016853(isomerase activity)	Mm.159575	TC1584715	ENSMUST00000034210	202.707	86.4002	222.316	212.852	172.953	119.75	81.6912	57.7591
NM_181043	0.00960959	0.196147	2.00893	up	NM_181043	Mylip	9430057C20Rik,MGC11702,Mir	Mus musculus myosin regulatory light chain interacting protein (Mylip), mRNA.	218203	chr13	45485110	45507309	GO:0006512(ubiquitin cycle);GO:0006928(cell motility);GO:0007399(nervous system development);GO:0008150(biological_process);GO:0016567(protein ubiquitination)	GO:0005622(intracellular);GO:0005737(cytoplasm);GO:0005856(cytoskeleton);GO:0016020(membrane)	GO:0003674(molecular_function);GO:0004842(ubiquitin-protein ligase activity);GO:0005488(binding);GO:0005515(protein binding);GO:0008092(cytoskeletal protein binding);GO:0008270(zinc ion binding);GO:0016874(ligase activity);GO:0046872(metal ion binding)	Mm.212855	TC1592256///TC1576509	ENSMUST00000038275	523.498	266.081	510.46	500.15	559.884	219.49	347.81	230.945
NR_002841	0.000876329	0.0994854	3.32101	up	NR_002841	Rn4.5s	-	Mus musculus 4.5S RNA (Rn4.5s) on chromosome 6.	19799	chr6	47604919	47702924							14791.9	4435.17	11861.7	15651	16863.2	5181.22	4131.44	3992.86
S40777	0.0266426	0.266416	2.15859	up	S40777	Cd72	CD72c,Ly-19,Ly-32,Ly-m19,Lyb-2	Lyb-2a.2=B cell differentiation antigen Lyb-2/CD72 [mice, mRNA, 1358 nt].	12517	chr4	43460606	43467435	GO:0006952(defense response)	GO:0005886(plasma membrane);GO:0016020(membrane);GO:0016021(integral to membrane)	GO:0005529(sugar binding)	Mm.188157	NP539730	ENSMUST00000098104	50.2979	22.2268	49.5216	32.1083	69.2637	21.3076	23.5702	21.8025
S94460	0.000291658	0.089091	3.37017	up	S94460	N/A	N/A	env {retrotransposon} [rodents, intracisternal A-particle-related retroviral element, IAPE, NIH15-CA2, neural, mRNA Transposon, 318 nt].	N/A	chr17	50390439	50392172							922.507	274.211	883.5	1043.87	840.152	307.496	280.209	234.928
U96682	0.023295	0.254476	2.88075	up	U96682	Pira1	6M21,Ly89,PIR-A1,Pir	Mus musculus immunoglobulin-like receptor PIRA1 (6M21) mRNA, complete cds.	18722	chr7	3683234	3796653	GO:0008150(biological_process)	GO:0005575(cellular_component)	GO:0003674(molecular_function)	Mm.441334	TC1584225		162.865	51.8983	253.599	143.31	91.687	54.0118	52.9004	48.7828
X62743	0.0199735	0.239347	2.04652	up	X62743	H2-DMb1	AI385589,H-2Mb1,H2-Mb1	M.musculus Mb mRNA.	14999	chr17	34282360	34297174	GO:0006955(immune response);GO:0019882(antigen processing and presentation);GO:0019886(antigen processing and presentation of exogenous peptide antigen via MHC class II);GO:0051085(chaperone cofactor-dependent protein folding)	GO:0016020(membrane);GO:0016021(integral to membrane);GO:0042613(MHC class II protein complex)		Mm.195060	TC1589400		236.162	115.586	181.246	286.298	240.942	146.288	91.5224	108.947
X70182	0.0221997	0.249743	2.37101	up	X70182	Eno3	Eno-3	M.musculus mRNA for muscle-specific beta enolase.	13808	chr11	70470705	70471378	GO:0006096(glycolysis)	GO:0000015(phosphopyruvate hydratase complex)	GO:0000287(magnesium ion binding);GO:0004634(phosphopyruvate hydratase activity);GO:0016829(lyase activity);GO:0046872(metal ion binding)	Mm.251322	TC1575951	ENSMUST00000072841	186.008	76.6871	163.028	133.777	261.22	66.0944	97.9388	66.0282
XM_001000082	0.0313839	0.282157	3.26614	up	XM_001000082	Bin2	-	PREDICTED: Mus musculus bridging integrator 2 (Bin2), mRNA.	668218	chr15	100470387	100499933							119.169	35.2381	133.434	61.5945	162.478	23.1536	48.2627	34.2981
XM_001003844	0.0490419	0.331286	2.63054	up	XM_001003844	F420015M19Rik	-	PREDICTED: Mus musculus RIKEN cDNA F420015M19 gene (F420015M19Rik), mRNA.	619329	chr17	80963367	80965648							142.366	60.1045	143.886	144.662	138.551	84.2076	68.7323	27.3737
XM_001006595	0.0329704	0.287868	2.89844	up	XM_001006595	Gm14354	OTTMUSG00000016414	PREDICTED: Mus musculus similar to 4930408F14Rik protein (LOC668961), mRNA.	668961	chrX	3546285	3547969							372.866	118.345	253.006	243.858	621.734	145.142	117.582	92.3092
XM_001471507	0.0213569	0.245704	3.09976	up	XM_001471507	LOC100038847	-	PREDICTED: Mus musculus hypothetical protein LOC100038847 (LOC100038847), mRNA.	100038847	chr14	7838628	7859963							194.609	65.3963	136.128	228.349	219.349	60.1972	96.64	39.3518
XM_001472060	0.0264618	0.265841	4.65827	up	XM_001472060	Gm1993	-	PREDICTED: Mus musculus hypothetical protein LOC100038977, transcript variant 1 (LOC100038977), mRNA.	100038977	chrX	24975632	24997544							196.859	37.9462	126.309	103.511	360.757	32.4549	25.9244	55.4592
XM_001472083	0.0339693	0.290138	4.82917	up	XM_001472083	Gm1993	-	PREDICTED: Mus musculus hypothetical protein LOC100038977, transcript variant 2 (LOC100038977), mRNA.	100038977	chrX	24975625	24997547							287.617	61.7026	424.456	134.445	303.949	36.1532	38.6049	110.35
XM_001472346	0.0382014	0.302238	3.64533	up	XM_001472346	Gm2066	-	PREDICTED: Mus musculus similar to Xlr-related, meiosis regulated (LOC100039145), mRNA.	100039145	chrX	28524041	28535636							299.059	86.7078	190.595	274.276	432.305	128.542	92.2299	39.3518
XM_001472427	0.004972	0.158657	3.82527	up	XM_001472427	Gm14525	OTTMUSG00000017011	PREDICTED: Mus musculus similar to Xlr-related, meiosis regulated, transcript variant 1 (LOC100039120), mRNA.	100039120	chrX	26099907	26129764							140.763	37.5641	115.771	127.728	178.789	24.9113	49.3986	38.3824
XM_001472499	0.0183745	0.23244	4.8949	up	XM_001472499	Gm6121	-	PREDICTED: Mus musculus novel protein similar to Xlr-related, meiosis regulated (Xmr) (LOC619991), mRNA.	619991	chrX	26339873	26362792							226.922	53.6793	199.736	282.83	198.201	25.0672	39.4628	96.5078
XM_001472530	0.000345854	0.089091	3.23102	up	XM_001472530	Gm2173	-	PREDICTED: Mus musculus hypothetical protein LOC100039345 (LOC100039345), mRNA.	100039345	chr4	61785856	61787909							3986.12	1242.66	3942.85	4301.81	3713.69	1476.79	1174.9	1076.3
XM_001472663	0.0138881	0.215601	2.5044	up	XM_001472663	Gm10058	ENSMUSG00000059047	PREDICTED: Mus musculus Xlr-related, meiosis regulated-like, transcript variant 1 (LOC100039240), mRNA.	100039240	chrX	27228259	27251124							136.613	54.404	157.17	155.815	96.853	59.9049	39.5128	63.7944
XM_001472797	0.0166413	0.226544	2.226	up	XM_001472797	Gm2212	-	PREDICTED: Mus musculus hypothetical protein LOC100039404 (LOC100039404), mRNA.	100039404	chr3	48537701	48539759							3034.66	1391.04	3531.49	3070.38	2502.12	1395.69	981.07	1796.37
XM_001472823	0.000101957	0.0713968	2.81152	up	XM_001472823	Gm2207	-	PREDICTED: Mus musculus similar to hCG2043352 (LOC100039396), mRNA.	100039396	chr15	6477855	6478917							267.046	94.6204	283.232	284.239	233.666	96.4326	95.918	91.5107
XM_001472970	0.036998	0.298363	2.21304	up	XM_001472970	Gm2264	-	PREDICTED: Mus musculus similar to R10D12.10 (LOC100039488), mRNA.	100039488	chr5	119436596	119482074							330.053	154.605	285.868	294.95	409.342	93.7414	201.424	168.651
XM_001473070	0.00502709	0.15961	3.31106	up	XM_001473070	Gm2226	-	PREDICTED: Mus musculus hypothetical protein LOC100039423 (LOC100039423), mRNA.	100039423	chrX	28488468	28489476							513.523	149.818	348.393	698.842	493.334	128.66	163.366	157.429
XM_001473156	0.0273424	0.269869	3.60363	up	XM_001473156	Gm2259	-	PREDICTED: Mus musculus hypothetical protein LOC100039481, transcript variant 1 (LOC100039481), mRNA.	100039481	chrX	30003212	30058744							471.511	120.368	682.038	216.064	516.43	96.6648	106.557	157.882
XM_001473178	0.0212819	0.245215	3.36569	up	XM_001473178	Gm2259	-	PREDICTED: Mus musculus hypothetical protein LOC100039481, transcript variant 2 (LOC100039481), mRNA.	100039481	chrX	30003219	30057885							150.273	47.8206	150.852	185.905	114.064	26.5253	42.4844	74.4522
XM_001473228	0.0432853	0.316262	2.22969	up	XM_001473228	Gm2283	-	PREDICTED: Mus musculus hypothetical protein LOC100039515 (LOC100039515), mRNA.	100039515	chrX	32328097	32378247							154.528	70.0622	196.862	105.214	161.508	54.4672	55.0237	100.696
XM_001473318	0.00314896	0.134053	3.48708	up	XM_001473318	1700066C05Rik	-	PREDICTED: Mus musculus RIKEN cDNA 1700066C05 gene (1700066C05Rik), mRNA.	78654	chr16	79999626	80000791				Mm.449974	TC1593287		804.293	223.066	944.914	940.267	527.697	233.843	227.628	207.727
XM_001473370	0.00419132	0.150137	2.01978	up	XM_001473370	1700066J24Rik	-	PREDICTED: Mus musculus RIKEN cDNA 1700066J24 gene (1700066J24Rik), mRNA.	76992	chr4	41464469	41465962				Mm.440546	TC1726273	ENSMUST00000038960	318.696	158.599	276.336	343.195	336.557	190.81	140.79	144.196
XM_001473384	0.0134625	0.212822	2.54873	up	XM_001473384	Gm2389	-	PREDICTED: Mus musculus similar to SP140 nuclear body protein family member (LOC100039723), mRNA.	100039723	chr1	85057725	85059851							432.756	176.059	404.987	395.708	497.573	230.957	113.51	183.71
XM_001473395	0.000824742	0.0994854	2.84296	up	XM_001473395	Gm2486	-	PREDICTED: Mus musculus hypothetical protein LOC100039903 (LOC100039903), mRNA.	100039903	chrX	123153535	123155414							542.34	192.252	593.225	536.691	497.105	202.134	219.09	155.531
XM_001473448	0.0124061	0.208821	2.09598	up	XM_001473448	Gm10153	ENSMUSG00000066101	PREDICTED: Mus musculus similar to keratin associated protein 5-4 (LOC100039757), mRNA.	100039757	chr7	149375331	149376294							1734.76	822.735	1309.28	1885.93	2009.05	898.727	912.609	656.868
XM_001473460	0.00937774	0.194305	3.49382	up	XM_001473460	Gm16510	ENSMUSG00000075300	PREDICTED: Mus musculus similar to High mobility group nucleosomal binding domain 2 (LOC100039766), mRNA.	100039766	chr2	70456684	70481407							134.769	39.3884	134.312	98.2708	171.725	34.1068	56.4591	27.5993
XM_001473765	0.0143311	0.216983	2.89456	up	XM_001473765	Gm2379	-	PREDICTED: Mus musculus similar to F36H12.3 (LOC100039704), mRNA.	100039704	chr13	98281158	98285757							67.7357	23.2635	94.1762	50.0655	58.9655	19.8843	31.7446	18.1615
XM_001473774	0.00277457	0.13031	2.54499	up	XM_001473774	Gm2526	-	PREDICTED: Mus musculus hypothetical protein LOC100039970 (LOC100039970), mRNA.	100039970	chr9	10290676	10292581							281.363	112.342	277.08	259.618	307.392	98.7149	143.827	94.483
XM_001473776	6.56046e-05	0.0705379	3.89354	up	XM_001473776	Gm14702	OTTMUSG00000017752	PREDICTED: Mus musculus hypothetical LOC671950 (LOC671950), mRNA.	671950	chrX	66223179	66244829			GO:0003676(nucleic acid binding);GO:0008907(integrase activity)	Mm.422496	TC1574886///TC1773639	ENSMUST00000080265	5586.91	1441.35	5269.24	5743.65	5747.83	1457.03	1254.03	1612.98
XM_001473790	0.000949333	0.0994854	7.99149	up	XM_001473790	Gm2538	-	PREDICTED: Mus musculus similar to gag polyprotein (LOC100039989), mRNA.	100039989	chr9	11945965	11947920							614.574	79.5237	497.148	694.104	652.468	83.7892	104.305	50.4772
XM_001474087	0.000437881	0.089091	2.9214	up	XM_001474087	Gm2605	-	PREDICTED: Mus musculus hypothetical protein LOC100040108 (LOC100040108), mRNA.	100040108	chr13	13430032	13432084							1605.87	551.179	1807.85	1506.04	1503.71	641.706	513.724	498.108
XM_001474095	9.454e-05	0.0713968	2.48632	up	XM_001474095	Gm2601	-	PREDICTED: Mus musculus hypothetical protein LOC100040104 (LOC100040104), mRNA.	100040104	chr19	9326191	9338012							525.965	211.474	483.443	536.161	558.292	213.247	224.579	196.597
XM_001474098	0.0127222	0.21047	2.69003	up	XM_001474098	Gm2635	-	PREDICTED: Mus musculus similar to putative G-protein coupled receptor (LOC100040158), mRNA.	100040158	chr1	85151778	85196768							104.869	40.4717	106.33	87.6592	120.618	28.3759	35.1758	57.8634
XM_001474127	0.000168958	0.0766675	4.90129	up	XM_001474127	Pisd-ps2	D030013I16Rik	PREDICTED: Mus musculus hypothetical protein LOC100040128 (LOC100040128), mRNA.	328734	chr17	3082300	3084402							817.883	168.802	795.735	874.625	783.289	141.417	206.25	158.739
XM_001474150	0.000388269	0.089091	3.97691	up	XM_001474150	Gm2608	-	PREDICTED: Mus musculus hypothetical protein LOC100040114 (LOC100040114), mRNA.	100040114	chr9	92896455	92900568							159.465	40.1772	152.957	185.572	139.866	36.4628	36.047	48.0218
XM_001474347	0.00174297	0.115866	3.43687	up	XM_001474347	Gm11563	2310045F10Rik,OTTMUSG00000002200	PREDICTED: Mus musculus similar to Keratin associated protein 4-7 (LOC100040248), mRNA.	100040248	chr11	99519733	99520280							147.592	43.2926	162.965	160.138	119.673	40.87	54.418	34.5897
XM_001474363	0.000964666	0.0994854	2.59446	up	XM_001474363	Gm14700	OTTMUSG00000017746	PREDICTED: Mus musculus hypothetical protein LOC100040255 (LOC100040255), mRNA.	100040255	chrX	66246106	66246553							1489.72	580.858	1499.49	1478.04	1491.64	630.646	650.439	461.489
XM_001474371	0.00766261	0.182932	2.53936	up	XM_001474371	Gm2764	-	PREDICTED: Mus musculus similar to MGC58416 protein (LOC100040425), mRNA.	100040425	chr16	89274753	89274912							652.978	258.765	747.147	702.838	508.95	298.524	189.98	287.792
XM_001474391	0.02297	0.253013	2.46197	up	XM_001474391	Gm2775	-	PREDICTED: Mus musculus similar to MGC58416 protein (LOC100040445), mRNA.	100040445	chr16	89307231	89307396							654.885	268.146	817.808	679.103	467.744	287.587	337.497	179.353
XM_001474418	0.0297161	0.276629	2.26299	up	XM_001474418	Gm2782	-	PREDICTED: Mus musculus similar to keratin associated protein 21-1 (LOC100040456), mRNA.	100040456	chr16	89396874	89397228							331.714	143.653	261.868	472.797	260.476	175.226	149.521	106.213
XM_001474427	0.0491712	0.331726	3.4597	up	XM_001474427	Gm2688	-	PREDICTED: Mus musculus similar to GPI-anchored cell surface glycoprotein required for diploid pseudohyphal formation and haploid invasive growth, transcriptionally regulated by the MAPK pathway (via Ste12p and Tec1p) and the cAMP pathway (via Flo8p) (LOC100040282), mRNA.	100040282	chr17	5447126	5448529							150.818	39.265	58.5573	195.414	198.482	50.7955	26.9808	40.0186
XM_001474570	0.00575709	0.166833	2.00573	up	XM_001474570	Gm14349	OTTMUSG00000016409	PREDICTED: Mus musculus similar to 4930408F14Rik protein (LOC100042185), mRNA.	100042185	chrX	3829610	3830388							237.821	117.523	196.642	227.368	289.454	130.312	117.582	104.675
XM_001474694	0.00652516	0.172761	4.09258	up	XM_001474694	Gm3757	-	PREDICTED: Mus musculus similar to 4930408F14Rik protein (LOC100042267), mRNA.	100042267	chrX	4527483	4529167							412.565	107.643	386.594	434.553	416.548	115.467	59.9271	147.534
XM_001474699	0.037869	0.301172	3.5631	up	XM_001474699	Gm2779	-	PREDICTED: Mus musculus similar to diacylglycerol kinase, eta (LOC100040452), mRNA.	100040452	chr14	3004257	3022044							127.628	34.1685	146.746	58.5128	177.625	30.817	22.0337	49.6547
XM_001474852	0.0295575	0.276163	5.73138	up	XM_001474852	Gm14598	OTTMUSG00000017383	PREDICTED: Mus musculus similar to Xlr-related, meiosis regulated, transcript variant 1 (LOC100040317), mRNA.	100040317	chrX	51539331	51556468							363.095	64.9505	384.23	158.97	546.083	49.9966	31.1708	113.684
XM_001474869	0.00814923	0.187129	2.54181	up	XM_001474869	Gm14598	OTTMUSG00000017383	PREDICTED: Mus musculus similar to Xlr-related, meiosis regulated, transcript variant 2 (LOC100040317), mRNA.	100040317	chrX	51539296	51556544							148.802	59.4881	180.165	138.063	128.177	79.7807	48.2823	50.4014
XM_001474959	0.0167455	0.226888	2.99981	up	XM_001474959	Gm2790	-	PREDICTED: Mus musculus similar to 4930408F14Rik protein (LOC100040467), mRNA.	100040467	chrX	30373996	30375797							3925.62	1386.91	3846.53	4657.08	3273.25	1179.43	873.886	2107.42
XM_001475029	0.0369749	0.298363	2.54004	up	XM_001475029	Gm2884	-	PREDICTED: Mus musculus hypothetical protein LOC100040653 (LOC100040653), mRNA.	100040653	chr16	91726867	91729101							157.167	66.0066	140.154	194.017	137.331	99.3599	37.496	61.1638
XM_001475040	0.0147336	0.218873	3.88407	up	XM_001475040	Gm2837	-	PREDICTED: Mus musculus similar to 4930408F14Rik protein (LOC100040552), mRNA.	100040552	chrX	31059303	31060987							200.614	53.8768	226.047	237.762	138.034	66.4488	66.5518	28.6299
XM_001475074	0.00174898	0.115866	5.0007	up	XM_001475074	Gm2854	-	PREDICTED: Mus musculus similar to 4930408F14Rik protein, transcript variant 1 (LOC100040585), mRNA.	100040585	chrX	31264188	31265990							329.353	68.4845	367.26	326.438	294.36	95.5433	63.1032	46.8069
XM_001475117	0.0259121	0.2639	3.21373	up	XM_001475117	7030419G21Rik	-	PREDICTED: Mus musculus RIKEN cDNA 7030419G21 gene (7030419G21Rik), mRNA.	434378	chr9	20347813	20349873							136.213	40.3494	71.9017	190.506	146.231	42.1574	50.6015	28.2892
XM_001475133	0.0240516	0.257816	2.76975	up	XM_001475133	Gm2864	-	PREDICTED: Mus musculus similar to 4930408F14Rik protein (LOC100040612), mRNA.	100040612	chrX	31428891	31430575							306.346	116.697	334.885	343.894	240.26	166.62	116.231	67.2408
XM_001475153	0.00253205	0.129015	2.13108	up	XM_001475153	Gm2890	-	PREDICTED: Mus musculus similar to LOC639390 protein (LOC100040659), mRNA.	100040659	chr2	6694988	6697050							5481.6	2589.31	5449.33	6017.1	4978.36	2554.63	2168	3045.3
XM_001475283	0.00451144	0.155435	3.04698	up	XM_001475283	Gm2888	-	PREDICTED: Mus musculus similar to 1700001E04Rik protein (LOC100040657), mRNA.	100040657	chr14	3029943	3038765							85.3853	27.6882	80.1918	64.9327	111.031	21.8361	31.7446	29.484
XM_001475285	0.000793716	0.0992298	6.0226	up	XM_001475285	Gm2881	-	PREDICTED: Mus musculus hypothetical protein LOC100040649 (LOC100040649), mRNA.	100040649	chr3	37291134	37294023							906.382	156.051	908.002	889.573	921.572	166.71	198.436	103.006
XM_001475295	0.000410307	0.089091	3.29557	up	XM_001475295	Gm2974	-	PREDICTED: Mus musculus hypothetical protein LOC100040801 (LOC100040801), mRNA.	100040801	chr14	4285497	4301067							462.74	138.937	369.113	508.243	510.863	133.677	144.842	138.291
XM_001475427	0.0325639	0.286835	3.65245	up	XM_001475427	Gm3015	-	PREDICTED: Mus musculus similar to CDNA sequence BC061237 (LOC100040875), mRNA.	100040875	chr14	43341873	43347769							156.983	49.9817	155.728	187.084	128.137	92.3122	29.4559	28.177
XM_001475451	0.02925	0.275358	2.01063	up	XM_001475451	Dynlt1f	-	PREDICTED: Mus musculus similar to tctex-1 protein, transcript variant 1 (LOC100040531), mRNA.	100040531	chr17	6592187	6609623							67.7009	32.9261	46.1581	70.8768	86.0679	26.8329	34.2324	37.713
XM_001475453	0.00316497	0.134053	2.6825	up	XM_001475453	Gm2744	-	PREDICTED: Mus musculus hypothetical protein LOC100040381 (LOC100040381), mRNA.	100040381	chr4	110945019	110945693							348.536	127.538	439.724	341.097	264.787	115.721	128.112	138.783
XM_001475495	0.0394607	0.305481	2.2791	up	XM_001475495	Gm2870	-	PREDICTED: Mus musculus hypothetical protein LOC100040620 (LOC100040620), mRNA.	100040620	chr3	149371871	149373010							1143.46	473.057	1469.39	1327.02	633.982	488.966	517.632	412.574
XM_001475502	0.0202644	0.240671	2.51957	up	XM_001475502	Gm3047	-	PREDICTED: Mus musculus similar to Predicted gene, EG545013 (LOC100040928), mRNA.	100040928	chr14	4658388	4663264							132.69	50.2578	123.361	189.818	84.8901	52.8669	55.7097	42.1968
XM_001475600	0.0214651	0.246211	3.75586	up	XM_001475600	Gm2971	-	PREDICTED: Mus musculus similar to 1700001E04Rik protein (LOC100040797), mRNA.	100040797	chr14	3555037	3565201							254.205	75.957	252.432	244.282	265.901	80.9081	113.161	33.8018
XM_001475615	0.0320773	0.285366	4.16174	up	XM_001475615	Gm3079	-	PREDICTED: Mus musculus hypothetical protein LOC100040985 (LOC100040985), mRNA.	100040985	chr7	66764637	66792104							201.059	52.4773	126.897	203.211	273.068	81.0421	54.115	22.2748
XM_001475622	0.00521533	0.161831	4.24131	up	XM_001475622	Gm3084	-	PREDICTED: Mus musculus similar to diacylglycerol kinase, eta (LOC100040996), mRNA.	100040996	chr14	4854183	4876749							182.436	44.8447	152.065	177.523	217.722	57.008	26.463	51.0632
XM_001475665	0.00942439	0.194493	3.43154	up	XM_001475665	Gm3105	-	PREDICTED: Mus musculus hypothetical protein LOC100041029 (LOC100041029), mRNA.	100041029	chr7	66850734	66868853							138.124	41.8513	164.683	143.31	106.38	62.0271	29.077	34.4497
XM_001475694	0.00580706	0.166833	2.32629	up	XM_001475694	Gm3224	-	PREDICTED: Mus musculus hypothetical protein LOC100041238 (LOC100041238), mRNA.	100041238	chr1	32123827	32125991							1086.28	478.838	1072.68	1126.05	1060.12	394.618	404.207	637.69
XM_001475695	0.0106287	0.201099	2.22263	up	XM_001475695	Gm3012	-	PREDICTED: Mus musculus similar to Predicted gene, EG432825, transcript variant 2 (LOC100040870), mRNA.	100040870	chr14	3740216	3748670							206.475	94.4952	228.302	217.961	173.161	88.7239	122.641	72.1209
XM_001475748	0.0211697	0.244576	3.87757	up	XM_001475748	Gm16427	EG666058	PREDICTED: Mus musculus similar to Expressed sequence AA792892, transcript variant 1 (LOC100040885), mRNA.	100040885	chr5	93910365	93965534							185.457	51.7689	142.085	233.78	180.506	67.7005	23.8118	63.7944
XM_001475762	0.0187155	0.233867	2.48439	up	XM_001475762	Gm2879	-	PREDICTED: Mus musculus hypothetical protein LOC100040646 (LOC100040646), mRNA.	100040646	chr13	105913655	105915578							2404.89	1003.41	2690.57	2560.93	1963.18	1351.17	1017.29	641.78
XM_001475763	0.0112353	0.204471	2.37348	up	XM_001475763	Gm2968	-	PREDICTED: Mus musculus hypothetical protein LOC100040790 (LOC100040790), mRNA.	100040790	chr15	65010637	65012727							2007.01	856.787	1804.79	2464.38	1751.87	1094.19	627.698	848.468
XM_001475800	0.00809533	0.186553	2.70165	up	XM_001475800	Gm3029	-	PREDICTED: Mus musculus similar to Predicted gene, EG545013, transcript variant 2 (LOC100040897), mRNA.	100040897	chr14	4034787	4043239							185.616	70.277	156.315	215.64	184.893	48.2503	88.8908	73.69
XM_001475808	0.00230525	0.125352	4.64413	up	XM_001475808	Gm3141	-	PREDICTED: Mus musculus similar to CDNA sequence BC061237 (LOC100041106), mRNA.	100041106	chr14	43824563	43829548							220.561	45.8762	261.743	260.565	139.377	42.7338	41.9228	52.972
XM_001475826	0.0011506	0.106311	3.73769	up	XM_001475826	Gm3395	-	PREDICTED: Mus musculus hypothetical protein LOC100041537 (LOC100041537), mRNA.	100041537	chrY	2550487	2552784							655.313	175.714	698.283	745.209	522.447	217.691	149.884	159.567
XM_001475869	0.0412249	0.31055	3.78341	up	XM_001475869	Gm7321	-	PREDICTED: Mus musculus similar to High mobility group protein B2 (High mobility group protein 2) (HMG-2) (LOC641258), mRNA.	641258	chr14	5420817	5421372							266.284	80.4108	280.18	318.076	200.598	29.4416	107.25	104.541
XM_001475894	0.00546987	0.163891	3.24746	up	XM_001475894	Gm3171	-	PREDICTED: Mus musculus hypothetical protein LOC100041160 (LOC100041160), mRNA.	100041160	chr18	32763813	32769367							615.599	182.447	536.419	438.045	872.333	208.417	169.104	169.819
XM_001475988	0.0172456	0.22817	3.5842	up	XM_001475988	Gm9495	-	PREDICTED: Mus musculus similar to ankyrin repeat domain 26 (LOC670593), mRNA.	670593	chr8	71944329	71977295							201.658	51.1309	189.9	102.903	312.171	53.4572	45.6755	54.2599
XM_001475992	0.0486581	0.329773	2.11736	up	XM_001475992	Gm3115	-	PREDICTED: Mus musculus similar to Predicted gene, EG545013, transcript variant 2 (LOC100041054), mRNA.	100041054	chr14	4187136	4202345							96.4254	48.5438	101.958	85.264	102.054	71.7765	44.7705	29.0843
XM_001476020	0.037078	0.29855	2.09233	up	XM_001476020	Gm3222	ENSMUSG00000079311	PREDICTED: Mus musculus similar to Glyceraldehyde-3-phosphate dehydrogenase (GAPDH) (LOC100041236), mRNA.	100041236	chr17	14838016	14847271							265.834	129.115	347.78	224.306	225.416	181.159	97.511	108.675
XM_001476025	0.0122333	0.208417	3.44826	up	XM_001476025	Gm3127	-	PREDICTED: Mus musculus similar to Predicted gene, EG432825, transcript variant 1 (LOC100041076), mRNA.	100041076	chr14	4268068	4276545							99.1499	28.1719	107.536	129.592	60.3219	37.5718	25.762	21.1819
XM_001476104	0.00664964	0.173518	3.19681	up	XM_001476104	Gm3253	-	PREDICTED: Mus musculus similar to diacylglycerol kinase, eta (LOC100041287), mRNA.	100041287	chr14	6113824	6137717							146.277	47.8736	163.921	132.089	142.821	70.1586	36.853	36.6093
XM_001476105	0.014288	0.216983	3.85695	up	XM_001476105	Gm16506	ENSMUSG00000072611	PREDICTED: Mus musculus hypothetical LOC673132 (LOC673132), mRNA.	673132	chr14	44299917	44305140							174.977	49.4583	154.642	173.221	197.068	24.3828	53.6205	70.3715
XM_001476114	0.00853605	0.190625	2.4748	up	XM_001476114	Gm3149	-	PREDICTED: Mus musculus similar to Predicted gene, EG545013, transcript variant 1 (LOC100041119), mRNA.	100041119	chr14	4420321	4428764							169.391	66.961	179.087	210.534	118.551	72.8151	56.9378	71.13
XM_001476129	0.0160153	0.225614	2.90619	up	XM_001476129	Zfp800	AA407452	PREDICTED: Mus musculus similar to Prion-like-(Q/N-rich)-domain-bearing protein family member (pqn-75) (LOC100041304), mRNA.	627049	chr6	28210742	28212599		GO:0005622(intracellular)	GO:0003676(nucleic acid binding);GO:0008270(zinc ion binding)	Mm.84441	TC1654794///TC1622015	ENSMUST00000035930	117.833	42.6879	110.746	104.202	138.551	24.8652	45.0571	58.1414
XM_001476132	0.0246175	0.259714	3.12403	up	XM_001476132	Gm3149	-	PREDICTED: Mus musculus similar to Predicted gene, EG545013, transcript variant 2 (LOC100041119), mRNA.	100041119	chr14	4420315	4428763							166.398	50.4134	91.7048	246.816	160.672	40.4135	44.4955	66.3312
XM_001476183	0.00241455	0.127005	2.39675	up	XM_001476183	ENSMUSG00000072735	-	PREDICTED: Mus musculus similar to 2610042L04Rik, transcript variant 1 (LOC100041151), mRNA.	100041151	chr14	4519560	4546929							219.658	92.1987	252.721	201.29	204.964	83.132	81.0059	112.458
XM_001476184	0.00623656	0.170249	2.67093	up	XM_001476184	Gm3227	-	PREDICTED: Mus musculus hypothetical protein LOC100041241 (LOC100041241), mRNA.	100041241	chr18	25755990	25762334							90.6447	32.93	122.383	66.128	83.4235	35.2833	33.7621	29.7445
XM_001476268	0.0344736	0.291922	2.34049	up	XM_001476268	Gm3182	-	PREDICTED: Mus musculus similar to Predicted gene, EG432825, transcript variant 1 (LOC100041177), mRNA.	100041177	chr14	4584783	4593219							152.303	69.6014	166.633	141.399	148.877	64.1805	103.394	41.2303
XM_001476309	8.96481e-05	0.0713968	2.89469	up	XM_001476309	Gm3051	-	PREDICTED: Mus musculus hypothetical protein LOC100040936 (LOC100040936), mRNA.	100040936	chr5	37607791	37609827							2666.52	924.957	2621.81	2634.54	2743.22	1048.72	861.796	864.36
XM_001476334	0.0048448	0.157772	2.88435	up	XM_001476334	Gm3322	-	PREDICTED: Mus musculus hypothetical protein LOC100041416 (LOC100041416), mRNA.	100041416	chrX	156719016	156721200							1132.75	394.656	982.389	1423.15	992.698	496.43	384.645	302.892
XM_001476516	5.97953e-05	0.0672801	3.37823	up	XM_001476516	Gm3181	-	PREDICTED: Mus musculus hypothetical protein LOC100041175 (LOC100041175), mRNA.	100041175	chr13	113015497	113017610							2354.73	694.019	2672.44	2248.62	2143.13	691.712	676.75	713.593
XM_001476557	0.0377807	0.300904	2.07598	up	XM_001476557	Gm8297	EG666800	PREDICTED: Mus musculus predicted gene, EG666800, transcript variant 1 (EG666800), mRNA.	666800	chr14	5086953	5095436							120.259	58.4162	159.903	102.877	97.9968	52.5316	79.657	43.0599
XM_001476596	0.00280681	0.13031	2.7628	up	XM_001476596	Gm3411	-	PREDICTED: Mus musculus hypothetical protein LOC100041569 (LOC100041569), mRNA.	100041569	chr14	7108986	7119890							549.825	196.745	415.262	647.581	586.631	173.172	191.551	225.512
XM_001476627	0.0346296	0.292123	2.33283	up	XM_001476627	Gm3308	-	PREDICTED: Mus musculus similar to ORF1 (LOC100041388), mRNA.	100041388	chr2	18194495	18197043							6748.28	2899.75	7496.51	8289.67	4458.67	4036.5	2499.93	2162.82
XM_001476642	0.0132596	0.211557	4.84953	up	XM_001476642	Gm9602	-	PREDICTED: Mus musculus similar to Predicted gene, EG432825 (LOC673676), mRNA.	673676	chr14	4879455	4887819				Mm.425853	TC1707552		140.279	27.8645	185.845	163.949	71.0425	17.2484	32.9163	33.4287
XM_001476729	0.000616559	0.0939301	4.93171	up	XM_001476729	Gm5957	-	PREDICTED: Mus musculus similar to High mobility group protein B2 (High mobility group protein 2) (HMG-2) (LOC546590), mRNA.	546590	chr14	7353013	7357762							252.672	52.6385	261.994	252.418	243.604	70.8035	44.0037	43.1083
XM_001476781	0.0497663	0.332126	2.3287	up	XM_001476781	Gm3460	-	PREDICTED: Mus musculus similar to Predicted gene, EG545013 (LOC100041664), mRNA.	100041664	chr14	7451886	7454929							104.381	44.7597	115.569	132.34	65.2334	56.5277	28.2143	49.5372
XM_001476854	0.00090198	0.0994854	4.63365	up	XM_001476854	Gm14759	OTTMUSG00000017905	PREDICTED: Mus musculus similar to 4930408F14Rik protein, transcript variant 2 (LOC100041594), mRNA.	100041594	chrX	72049267	72050949							402.207	86.2165	501.756	313.922	390.943	102.172	70.2805	86.1971
XM_001476927	0.0360904	0.296486	2.79982	up	XM_001476927	Gm16388	EG546323	PREDICTED: Mus musculus similar to 4930408F14Rik protein, transcript variant 1 (LOC100041642), mRNA.	100041642	chrX	72134979	72136780							154.891	58.0343	201.792	150.603	112.278	83.5052	59.0905	31.5073
XM_001477003	0.0119545	0.207075	2.74745	up	XM_001477003	Gm3424	-	PREDICTED: Mus musculus similar to Predicted gene, EG432825, transcript variant 1 (LOC100041598), mRNA.	100041598	chr14	5953951	5962408							198.235	72.6758	167.801	260.565	166.341	50.2435	91.5153	76.2686
XM_001477020	0.00202376	0.122653	3.48963	up	XM_001477020	Gm3424	-	PREDICTED: Mus musculus similar to Predicted gene, EG432825, transcript variant 2 (LOC100041598), mRNA.	100041598	chr14	5953952	5962403							261.463	77.0446	280.838	240.528	263.023	62.5326	104.807	63.7944
XM_001477044	0.0332414	0.288469	2.73738	up	XM_001477044	Gm3453	-	PREDICTED: Mus musculus similar to Predicted gene, EG545013, transcript variant 2 (LOC100041651), mRNA.	100041651	chr14	6102764	6111196							139.934	50.4984	128.979	89.6302	201.193	53.8551	32.1494	65.4906
XM_001477115	0.0136141	0.213728	3.58452	up	XM_001477115	Gm3476	-	PREDICTED: Mus musculus similar to Predicted gene, EG545013, transcript variant 2 (LOC100041702), mRNA.	100041702	chr14	6249387	6257834							231.024	62.2777	347.321	198.09	147.661	48.3382	54.0185	84.4764
XM_001477141	0.0128201	0.210649	2.92794	up	XM_001477141	Gm3554	-	PREDICTED: Mus musculus similar to predicted gene, EG665255 (LOC100041866), mRNA.	100041866	chr7	7312677	7315071							169.85	55.9821	107.152	170.842	231.557	45.6957	67.5025	54.7481
XM_001477177	0.013232	0.211294	4.38887	up	XM_001477177	N/A	N/A	PREDICTED: Mus musculus hypothetical protein LOC100041893 (LOC100041893), mRNA.	N/A	chr14	8475745	8491287							553.084	142.426	525.908	571.01	562.333	240.683	113.42	73.1732
XM_001477226	0.00180075	0.117089	3.50189	up	XM_001477226	Zfp640	Mzf6d	PREDICTED: Mus musculus Kruppel associated box containing gene (Mzf6d), mRNA.	386626	chr13	66773875	66778625	GO:0006355(regulation of transcription, DNA-dependent);GO:0008150(biological_process)	GO:0005575(cellular_component);GO:0005622(intracellular);GO:0005634(nucleus)	GO:0003674(molecular_function);GO:0003676(nucleic acid binding);GO:0008270(zinc ion binding);GO:0046872(metal ion binding)	Mm.425832///Mm.183391	TC1776437///TC1646497///TC1624207	ENSMUST00000099418///ENSMUST00000081471	217.719	62.1005	212.239	266.607	174.31	50.7955	76.0547	59.4512
XM_001477298	0.0213622	0.245704	2.79007	up	XM_001477298	Gm3518	-	PREDICTED: Mus musculus similar to Predicted gene, EG432825, transcript variant 2 (LOC100041804), mRNA.	100041804	chr14	6757505	6765944							167.97	62.9842	173.262	203.031	127.617	47.5337	96.233	45.1859
XM_001477305	0.00578594	0.166833	2.5893	up	XM_001477305	Gm10488	ENSMUSG00000073257,MGC118207	PREDICTED: Mus musculus similar to Sycp3 like X-linked, transcript variant 1 (LOC100042109), mRNA.	100042109	chrX	29130552	29153416							149.639	58.2296	123.043	178.205	147.669	68.1871	63.2643	43.2373
XM_001477335	0.0266538	0.266425	2.32649	up	XM_001477335	Gm3607	-	PREDICTED: Mus musculus similar to EC2-V2R pheromone receptor protein (LOC100041983), mRNA.	100041983	chr7	8639867	8670523							160.64	68.9036	120.868	143.421	217.631	87.8836	70.4113	48.4159
XM_001477467	0.0456354	0.322015	3.49789	up	XM_001477467	Vmn2r-ps43	EG665539	PREDICTED: Mus musculus similar to EC2-V2R pheromone receptor protein (LOC665539), mRNA.	665539	chr7	9292201	9306166							147.309	46.0475	102.506	131.203	208.217	72.1068	46.536	19.4996
XM_001477481	0.00263555	0.129915	2.9578	up	XM_001477481	Gm3705	-	PREDICTED: Mus musculus hypothetical protein LOC100042167 (LOC100042167), mRNA.	100042167	chr7	110728968	110729689							137.315	45.6247	123.793	109.475	178.677	42.9105	52.133	41.8306
XM_001477605	0.00983659	0.196835	2.31673	up	XM_001477605	Gm3346	-	PREDICTED: Mus musculus hypothetical protein LOC100041451, transcript variant 1 (LOC100041451), mRNA.	100041451	chr9	68032185	68033137							2225.31	936.351	1532.75	2666.54	2476.65	970.854	998.113	840.087
XM_001477617	0.000901911	0.0994854	2.98414	up	XM_001477617	Gm3346	-	PREDICTED: Mus musculus hypothetical protein LOC100041451, transcript variant 2 (LOC100041451), mRNA.	100041451	chr9	68031839	68032815							583.885	193.242	456.086	672.751	622.816	195.529	203.216	180.982
XM_001477634	0.00316455	0.134053	2.58992	up	XM_001477634	Gm8362	EG666918	PREDICTED: Mus musculus predicted gene, EG666918, transcript variant 1 (EG666918), mRNA.	666918	chr14	7598473	7606931							155.261	61.0058	146.555	172.309	146.919	53.3595	78.9864	50.6716
XM_001477660	0.00211464	0.124311	3.44434	up	XM_001477660	Gm3545	-	PREDICTED: Mus musculus hypothetical protein LOC100041851 (LOC100041851), mRNA.	100041851	chr7	4340256	4341004							173.62	51.3341	185.922	188.218	146.72	47.0742	67.2188	39.7092
XM_001477672	0.0454383	0.321284	3.02083	up	XM_001477672	Gm3642	-	PREDICTED: Mus musculus similar to Predicted gene, EG432825, transcript variant 2 (LOC100042054), mRNA.	100042054	chr14	7664527	7672902							366.401	128.152	425.6	443.809	229.794	126.103	64.3669	193.987
XM_001477685	0.00262688	0.129759	4.74566	up	XM_001477685	Gm3642	-	PREDICTED: Mus musculus similar to Predicted gene, EG432825, transcript variant 3 (LOC100042054), mRNA.	100042054	chr14	7664976	7672820							215.102	43.2242	233.488	280.863	130.954	45.4934	44.3983	39.7809
XM_001477721	0.0037457	0.144029	2.54258	up	XM_001477721	Gm9736	-	PREDICTED: Mus musculus RIKEN cDNA A030009A09 gene (A030009A09Rik), mRNA.	77763	chr10	77213265	77214099							142.445	56.1587	154.721	114.64	157.974	57.2817	66.3243	44.87
XM_001477787	0.0214794	0.246211	2.00113	up	XM_001477787	Gm11937	OTTMUSG00000004963	PREDICTED: Mus musculus similar to Krtap2-4 protein (LOC100041488), mRNA.	100041488	chr11	99471107	99471544							303.337	152.264	311.772	363.061	235.178	123.562	137.014	196.217
XM_001477825	0.000767113	0.098334	3.65381	up	XM_001477825	Gm9611	-	PREDICTED: Mus musculus similar to CDNA sequence BC061237 (LOC674032), mRNA.	674032	chr14	42870261	42876187							170.114	46.0104	147.419	148.152	214.771	52.0847	42.291	43.6556
XM_001477837	0.022814	0.252466	2.46005	up	XM_001477837	Gm3285	-	PREDICTED: Mus musculus similar to A030009A09Rik protein (LOC100041351), mRNA.	100041351	chr10	77324713	77326049							124.551	52.8286	120.18	107.418	146.057	69.0738	57.5554	31.8565
XM_001477840	0.00739809	0.179888	4.91962	up	XM_001477840	Gm3578	-	PREDICTED: Mus musculus similar to Predicted gene, EG545047 (LOC100041930), mRNA.	100041930	chr14	42670557	42674087							206.238	44.9412	223.837	230.601	164.276	62.5803	49.0367	23.2067
XM_001477941	0.016231	0.226128	4.27832	up	XM_001477941	Gm3790	-	PREDICTED: Mus musculus similar to Ubtf protein (LOC100042323), mRNA.	100042323	chr18	48518536	48529949							180.622	40.2297	164.801	98.0332	279.032	27.2121	38.4304	55.0465
XM_001478003	0.00508421	0.160066	2.31191	up	XM_001478003	Gm3781	-	PREDICTED: Mus musculus similar to pORF2 (LOC100042306), mRNA.	100042306	chrX	81586630	81589098							36791.3	16206	39553.8	34004.5	36815.6	16743	19767.3	12107.7
XM_001478082	0.0092829	0.193931	3.21506	up	XM_001478082	Gm10338	ENSMUSG00000071588	PREDICTED: Mus musculus similar to Predicted gene, EG432825, transcript variant 2 (LOC100042304), mRNA.	100042304	chr14	8413114	8428564							290.516	87.3477	407.633	191.114	272.802	85.8483	105.758	70.4368
XM_001478088	0.00100479	0.0994854	2.45017	up	XM_001478088	Gm3813	-	PREDICTED: Mus musculus similar to Pro-Pol-dUTPase polyprotein; RNaseH; dUTPase; integrase; protease; reverse transcriptase (LOC100042383), mRNA.	100042383	chr10	104432414	104441921							2342.21	953.915	2644.49	2376.38	2005.77	1010.31	1019.3	832.141
XM_001478221	0.00100022	0.0994854	2.67769	up	XM_001478221	Gm3697	-	PREDICTED: Mus musculus hypothetical protein LOC100042151 (LOC100042151), mRNA.	100042151	chr4	133474498	133476684							761.587	283.69	894.36	726.475	663.926	277.371	251.105	322.594
XM_001478340	0.000760409	0.098334	3.86589	up	XM_001478340	Gm3798	-	PREDICTED: Mus musculus hypothetical protein LOC100042341 (LOC100042341), mRNA.	100042341	chr13	65423174	65425278							3664.98	932.825	3455.23	4636.47	2903.25	872.022	895.009	1031.45
XM_001478363	0.0306686	0.279463	2.33118	up	XM_001478363	Gm3880	-	PREDICTED: Mus musculus hypothetical protein LOC100042516 (LOC100042516), mRNA.	100042516	chrX	99881748	99882349							155.648	64.1398	117.498	232.38	117.065	78.6512	51.6027	62.1656
XM_001478415	0.0256046	0.262832	3.98105	up	XM_001478415	Gm4292	-	PREDICTED: Mus musculus hypothetical protein LOC100043206 (LOC100043206), mRNA.	100043206	chrX	23848873	23849892							439.963	113.667	368.209	293.12	658.558	148.149	137.583	55.2687
XM_001478430	0.000932842	0.0994854	3.02377	up	XM_001478430	Gm5934	EG546272	PREDICTED: Mus musculus predicted gene, EG546272, transcript variant 1 (EG546272), mRNA.	546272	chrX	24051642	24077852							116.231	38.3362	106.783	139.326	102.585	33.7226	44.4955	36.7906
XM_001478442	0.0415889	0.311407	2.16518	up	XM_001478442	Gm3844	-	PREDICTED: Mus musculus hypothetical protein LOC100042434 (LOC100042434), mRNA.	100042434	chr13	66163388	66163913							201.936	98.5463	222.646	207.373	175.788	100.689	136.972	57.9779
XM_001478477	0.00114912	0.106311	2.8709	up	XM_001478477	Gm5589	-	PREDICTED: Mus musculus similar to hypothetical protein MGC37588 (LOC434166), mRNA.	434166	chr4	133940847	133942893					TC1681507		2652.73	921.046	2814.66	2981.11	2162.42	944.963	1031.41	786.766
XM_001478641	0.0166362	0.226544	3.54021	up	XM_001478641	Gm3968	-	PREDICTED: Mus musculus similar to OBOX4 (LOC100042691), mRNA.	100042691	chr7	15709498	15715462							396.496	121.99	410.371	359.402	419.716	161.872	144.417	59.6808
XM_001478649	0.0209712	0.243733	5.53441	up	XM_001478649	Gm3977	-	PREDICTED: Mus musculus similar to OBOX4 (LOC100042702), mRNA.	100042702	chr7	15724894	15726833							262.88	55.5365	175.213	295.343	318.083	25.7825	35.8889	104.938
XM_001478653	5.89877e-05	0.0672801	8.82415	up	XM_001478653	Gm3980	-	PREDICTED: Mus musculus similar to OBOX4 (LOC100042707), mRNA.	100042707	chr7	15736262	15738201							221.874	24.8691	272.024	208.233	185.365	27.1966	23.9396	23.4712
XM_001478665	4.9377e-05	0.064027	3.0132	up	XM_001478665	Gm3984	-	PREDICTED: Mus musculus similar to OBOX4 (LOC100042714), mRNA.	100042714	chr7	15758673	15760612							163.703	54.5004	168.456	161.546	161.107	52.4621	50.2566	60.7825
XM_001478673	0.00588278	0.167255	2.85501	up	XM_001478673	Gm3987	-	PREDICTED: Mus musculus similar to OBOX4 (LOC100042717), mRNA.	100042717	chr7	15770014	15771953							217.061	78.5483	227.393	226.463	197.326	81.4499	52.9519	101.243
XM_001478679	0.000603402	0.0939301	3.79508	up	XM_001478679	Gm4031	-	PREDICTED: Mus musculus hypothetical protein LOC100042787 (LOC100042787), mRNA.	100042787	chr14	48228123	48230171							2651.08	701.62	3090.02	2535.62	2327.61	844.193	676.054	584.614
XM_001478694	0.0023957	0.126629	4.007	up	XM_001478694	Gm3993	-	PREDICTED: Mus musculus similar to Predicted gene, EG245297 (LOC100042727), mRNA.	100042727	chr12	20074775	20098214							190.988	46.5059	209.319	234.802	128.844	51.7777	48.7289	39.0111
XM_001478696	0.0121419	0.207923	3.67967	up	XM_001478696	Gm3994	-	PREDICTED: Mus musculus similar to OBOX4 (LOC100042728), mRNA.	100042728	chr7	15792658	15794597							232.339	65.6644	162.496	273.336	261.186	100.324	44.4225	52.2462
XM_001478768	0.00632245	0.171161	4.57035	up	XM_001478768	Vmn2r31	-	PREDICTED: Mus musculus vomeronasal receptor Vmn2r31, transcript variant 3 (Vmn2r31), mRNA.	100042591	chr7	7336695	7352338							173.297	40.074	207.373	172.761	139.756	57.9286	23.1002	39.1933
XM_001478781	0.00791439	0.184271	3.41042	up	XM_001478781	Gm9629	-	PREDICTED: Mus musculus similar to CG32602-PA (LOC674779), mRNA.	674779	chr13	68137919	68139504							113.821	32.1029	144.796	127.647	69.0203	36.3175	33.7644	26.2268
XM_001478786	0.0100087	0.198118	5.29926	up	XM_001478786	Gm4023	-	PREDICTED: Mus musculus similar to OBOX4 (LOC100042771), mRNA.	100042771	chr7	16276997	16278931							138.084	29.7396	132.001	156.444	125.807	18.6357	17.7222	52.8608
XM_001478930	0.00857068	0.190805	2.55532	up	XM_001478930	Gm4066	-	PREDICTED: Mus musculus similar to Smo protein (LOC100042851), mRNA.	100042851	chr13	85163960	85165071							132.432	52.8661	114.079	158.345	124.871	45.5839	41.4276	71.5868
XM_001478935	0.0451154	0.320489	3.17715	up	XM_001478935	Gm3923	-	PREDICTED: Mus musculus hypothetical protein LOC100042602 (LOC100042602), mRNA.	100042602	chr11	61204630	61211164							189.337	57.9079	223.144	252.657	92.2087	53.7183	84.1434	35.8619
XM_001479154	0.00226972	0.125352	6.07096	up	XM_001479154	Gm16442	EG667071	PREDICTED: Mus musculus similar to pheromone receptor V3R8 (LOC620401), mRNA.	620401	chr7	20707004	20709110							167.897	28.0292	173.871	211.176	118.643	22.0389	22.1293	39.9194
XM_001479203	0.0187807	0.233917	2.95781	up	XM_001479203	Gm4135	-	PREDICTED: Mus musculus similar to pheromone receptor V3R8 (LOC100042968), mRNA.	100042968	chr7	21027018	21029474							356.174	112.255	546.393	309.068	213.061	129.574	102.516	104.675
XM_001479218	0.000115363	0.0713968	3.87507	up	XM_001479218	Vmn2r45	-	PREDICTED: Mus musculus similar to vomeronasal 2, receptor, 14, transcript variant 2 (LOC100042810), mRNA.	100042810	chr7	9638195	9656552							120.408	31.1928	111.564	118.551	131.11	36.1742	28.7248	28.6793
XM_001479235	0.0155067	0.222126	6.27607	up	XM_001479235	Gm4144	-	PREDICTED: Mus musculus similar to pheromone receptor V3R8 (LOC100042980), mRNA.	100042980	chr7	21287647	21290505							214.154	36.521	170.991	143.93	327.541	16.0452	34.3448	59.173
XM_001479365	0.00308195	0.133822	3.19698	up	XM_001479365	Gm4177	-	PREDICTED: Mus musculus similar to pheromone receptor V3R8 (LOC100043025), mRNA.	100043025	chr7	22580829	22582971							268.74	84.5511	284.432	310.351	211.438	89.4741	100.922	63.2572
XM_001479399	0.0169964	0.227915	2.0544	up	XM_001479399	Gm4051	-	PREDICTED: Mus musculus similar to pORF1 (LOC100042826), mRNA.	100042826	chr1	133273037	133275108							2626.35	1252.2	3318.06	2680.91	1880.09	1080.68	1265.05	1410.86
XM_001479521	0.00746902	0.180412	3.34087	up	XM_001479521	Gm4283	-	PREDICTED: Mus musculus hypothetical protein LOC100043186 (LOC100043186), mRNA.	100043186	chr14	53489021	53491205							796.268	252.335	782.787	794.042	811.977	238.388	361.602	157.014
XM_001479562	4.78161e-05	0.064027	3.12599	up	XM_001479562	Gm4006	-	PREDICTED: Mus musculus hypothetical protein LOC100042748 (LOC100042748), mRNA.	100042748	chr15	79700255	79702312							2720.43	873.236	2727.02	2767.9	2666.36	897.919	775.038	946.75
XM_001479609	0.000593205	0.0939301	4.17698	up	XM_001479609	Gm4408	-	PREDICTED: Mus musculus similar to antigen LEC-A (LOC100043390), mRNA.	100043390	chr6	80605022	80609097							5933.54	1412.98	6808.43	6322.4	4669.8	1495.82	1564.35	1178.77
XM_001479887	0.0464784	0.323598	3.14758	up	XM_001479887	Gm9788	ENSMUSG00000044065	PREDICTED: Mus musculus similar to developmental pluripotency-associated 2 (LOC100043167), mRNA.	100043167	chr19	41534269	41535423							87.5505	24.536	35.2121	125.247	102.193	21.0998	24.1773	28.3309
XM_001479893	0.0113572	0.205678	2.63269	up	XM_001479893	N/A	N/A	PREDICTED: Mus musculus hypothetical protein LOC100042910 (LOC100042910), mRNA.	N/A	chr2	57088637	57090708							128.313	46.8548	161.093	142.925	80.9218	47.2308	50.6624	42.6713
XM_001479902	0.0386346	0.303713	3.55212	up	XM_001479902	Gm13546	OTTMUSG00000012675	PREDICTED: Mus musculus hypothetical protein LOC100042926, transcript variant 1 (LOC100042926), mRNA.	100042926	chr2	58021959	58029474							113.126	31.532	59.1548	108.075	172.146	49.55	19.1006	25.9454
XM_001479912	0.000180367	0.0791137	2.04491	up	XM_001479912	Gm9444	-	PREDICTED: Mus musculus hypothetical LOC669185 (LOC669185), mRNA.	669185	chr7	146146934	146147781							13922.9	6798.72	14534.8	14576.3	12657.8	6841.18	6472.3	7082.68
XM_001479914	0.025651	0.2629	2.63284	up	XM_001479914	1700022N22Rik	-	PREDICTED: Mus musculus RIKEN cDNA 1700022N22 gene (1700022N22Rik), mRNA.	69431	chr17	26122759	26125519							172.373	70.2989	176.967	166.786	173.366	97.303	38.2386	75.3552
XM_001480251	0.0110978	0.204327	2.33938	up	XM_001480251	Gm4464	-	PREDICTED: Mus musculus similar to CG2839-PA (LOC100043477), mRNA.	100043477	chr16	57998097	58406504							2920.43	1245.43	3481.74	3101.68	2177.86	1572.13	1131.14	1033.03
XM_001480321	0.0426188	0.314404	2.53665	up	XM_001480321	Gm4316	-	PREDICTED: Mus musculus hypothetical protein LOC100043251 (LOC100043251), mRNA.	100043251	chr8	125696744	125702665							89.096	37.547	109.691	72.4561	85.1408	55.3165	37.1515	20.173
XM_001480348	1.4554e-05	0.0586483	4.35025	up	XM_001480348	Gm4492	-	PREDICTED: Mus musculus similar to gag (LOC100043516), mRNA.	100043516	chr6	123627888	123629787							5937.92	1364.93	6417.83	5800.09	5595.83	1404.08	1434.74	1255.97
XM_001480362	0.0291975	0.275358	3.07696	up	XM_001480362	Gm9530	-	PREDICTED: Mus musculus hypothetical LOC671336 (LOC671336), mRNA.	671336	chr1	156910576	156912449							118.404	39.0825	76.8796	110.16	168.171	26.7797	30.3859	60.082
XM_001480394	0.0112785	0.204861	2.70711	up	XM_001480394	Gm4293	-	PREDICTED: Mus musculus hypothetical protein LOC100043208 (LOC100043208), mRNA.	100043208	chr10	99606052	99606798							257.653	94.35	183.374	333.957	255.629	122.148	83.9666	76.9358
XM_001480397	0.00262737	0.129759	3.2827	up	XM_001480397	Gm4296	-	PREDICTED: Mus musculus hypothetical protein LOC100043211 (LOC100043211), mRNA.	100043211	chr10	99691572	99693643							2961.82	903.621	3229.45	3369.1	2286.91	1009.31	1014.84	686.715
XM_001480466	0.0496063	0.332106	2.1024	up	XM_001480466	Gm5953	EG546524	PREDICTED: Mus musculus predicted gene, EG546524 (EG546524), mRNA.	546524	chr12	19294416	19297032							429.665	198.072	322.217	636.902	329.875	188.785	252.765	152.665
XM_001480485	0.0370276	0.298363	2.3197	up	XM_001480485	Gm4494	-	PREDICTED: Mus musculus hypothetical protein LOC100043519 (LOC100043519), mRNA.	100043519	chr7	20779058	20779982							168.439	68.7641	162.944	242.326	100.047	76.0869	56.2201	73.9852
XM_001480490	0.0388543	0.303934	4.36668	up	XM_001480490	Gm4498	-	PREDICTED: Mus musculus similar to pheromone receptor V3R8 (LOC100043523), mRNA.	100043523	chr7	20818256	20820367							369.862	102.866	449.754	372.416	287.416	189.573	81.6912	37.3344
XM_001480503	0.0493941	0.332015	2.11131	up	XM_001480503	Gm4505	-	PREDICTED: Mus musculus hypothetical protein LOC100043533 (LOC100043533), mRNA.	100043533	chr7	20954048	20955399							125.026	61.8478	150.162	103.29	121.625	80.6411	36.1566	68.7457
XM_001480547	0.000321306	0.089091	4.34048	up	XM_001480547	Gm16444	EG667283	PREDICTED: Mus musculus similar to pheromone receptor V3R8, transcript variant 1 (LOC100043569), mRNA.	100043569	chr7	21554969	21557097							215.675	50.1665	239.463	209.968	197.593	40.3892	50.2566	59.8538
XM_001480583	0.0430429	0.315465	2.77659	up	XM_001480583	Gm8519	EG667215	PREDICTED: Mus musculus predicted gene, EG667215, transcript variant 1 (EG667215), mRNA.	667215	chr7	22055968	22058121							517.325	168.15	734.964	580.386	236.623	184.285	153.78	166.385
XM_001480674	0.00936333	0.194305	4.99071	up	XM_001480674	Gm16507	ENSMUSG00000074298	PREDICTED: Mus musculus similar to pheromone receptor V3R8 (LOC670857), mRNA.	670857	chr7	23627706	23628624							298.979	60.6314	266.806	195.602	434.527	47.931	93.0664	40.8969
XM_001480779	0.0116145	0.206153	2.30062	up	XM_001480779	Gm4552	-	PREDICTED: Mus musculus similar to keratin associated protein 5-5 (LOC100043616), mRNA.	100043616	chr7	149329658	149330508							449.783	196.914	419.878	554.536	374.933	225.839	221.741	143.162
XM_001480815	0.0303787	0.278265	2.64862	up	XM_001480815	Gm4606	-	PREDICTED: Mus musculus hypothetical protein LOC100043721 (LOC100043721), mRNA.	100043721	chr14	73240447	73263362							58.4709	21.4303	87.9428	39.4364	48.0336	18.1577	16.8779	29.2552
XM_001480829	0.000554144	0.0931213	4.9981	up	XM_001480829	Gm4549	-	PREDICTED: Mus musculus similar to Pro-Pol-dUTPase polyprotein; RNaseH; dUTPase; integrase; protease; reverse transcriptase (LOC100043608), mRNA.	100043608	chr3	106392177	106393780							1412.25	282.736	1605	1513.33	1118.42	322.741	302.923	222.543
XM_001480950	0.00298412	0.132919	2.04506	up	XM_001480950	Gm4645	-	PREDICTED: Mus musculus hypothetical protein LOC100043783 (LOC100043783), mRNA.	100043783	chr14	95210290	95212311							2925.06	1422.34	3462.42	2513.3	2799.47	1515.16	1491.39	1260.46
XM_001481023	0.0036609	0.142162	2.43821	up	XM_001481023	Gm4635	-	PREDICTED: Mus musculus hypothetical protein LOC100043770 (LOC100043770), mRNA.	100043770	chr17	43322823	43327648							34391.8	13884.1	34489.7	42311.2	26374.5	12667	15134.4	13850.9
XM_001481117	0.00694446	0.175249	5.43388	up	XM_001481117	Gm4679	-	PREDICTED: Mus musculus hypothetical protein LOC100043829 (LOC100043829), mRNA.	100043829	chr17	54122602	54123282							325.493	64.5182	412.031	309.941	254.506	38.1646	104.689	50.7006
XM_001481156	0.00139446	0.106884	3.16607	up	XM_001481156	Gm4703	-	PREDICTED: Mus musculus hypothetical protein LOC100043874 (LOC100043874), mRNA.	100043874	chr7	37949027	37951128							1845.4	592.985	1817.75	1705.84	2012.62	540.651	759.283	479.021
XM_001481217	0.00159623	0.111953	2.73307	up	XM_001481217	Gm4720	-	PREDICTED: Mus musculus similar to ORF1 (LOC100043907), mRNA.	100043907	chr17	93437174	93438963							3837.53	1396.56	4447.6	3094.42	3970.58	1462.18	1534.55	1192.96
XM_135671	0.0367455	0.297775	2.08868	up	XM_135671	Gm4902	EG236451	PREDICTED: Mus musculus predicted gene, EG236451, transcript variant 1 (EG236451), mRNA.	236451	chr14	59939807	59960188							253.695	125.125	212.518	233.007	315.559	89.637	107.09	178.647
XM_181343	0.00683439	0.174943	2.2847	up	XM_181343	Prpsap1	5730409F23Rik,PAP39	PREDICTED: Mus musculus phosphoribosyl pyrophosphate synthetase-associated protein 1 (Prpsap1), mRNA.	67763	chr11	116331811	116360241	GO:0009116(nucleoside metabolic process);GO:0009165(nucleotide biosynthetic process)	GO:0005615(extracellular space)	GO:0000287(magnesium ion binding);GO:0004749(ribose phosphate diphosphokinase activity)	Mm.25125	TC1766749///TC1595785	ENSMUST00000021153	338.704	151.626	360.32	334.087	321.706	162.965	183.07	108.845
XM_356334	0.00883406	0.191038	3.65323	up	XM_356334	4930408F14Rik	-	PREDICTED: Mus musculus RIKEN cDNA 4930408F14 gene (4930408F14Rik), mRNA.	74851	chrX	70420640	70422328	GO:0007276(gamete generation)			Mm.307966	NP742578		300.528	87.5141	347.223	298.884	255.477	59.3317	67.57	135.641
XM_485921	0.0304813	0.278265	3.87845	up	XM_485921	Gm5593	EG434175	PREDICTED: Mus musculus predicted gene, EG434175, transcript variant 1 (EG434175), mRNA.	434175	chr7	49361142	49362686							147.64	45.2494	127.023	152.501	163.396	25.3871	85.3113	25.0498
XM_486606	0.0140086	0.215919	3.3277	up	XM_486606	Gm14332	OTTMUSG00000016361	PREDICTED: Mus musculus similar to 4930408F14Rik protein (LOC434721), mRNA.	434721	chrX	3076744	3078426							408.453	129.768	422.079	473.108	330.171	72.6849	137.194	179.426
XM_487990	0.0341302	0.290622	4.14708	up	XM_487990	Gm5725	EG435940	PREDICTED: Mus musculus predicted gene, EG435940 (EG435940), mRNA.	435940	chr7	22628362	22629286							162.495	40.791	213.141	188.617	85.7286	39.3532	63.7623	19.2576
XM_487996	0.00124779	0.106392	3.14741	up	XM_487996	Gm5726	EG435946	PREDICTED: Mus musculus predicted gene, EG435946 (EG435946), mRNA.	435946	chr7	21130182	21131106							134.164	42.7675	150.774	140.272	111.448	49.9901	34.5774	43.735
XM_487999	0.00259346	0.129759	5.39738	up	XM_487999	Gm5728	EG435949	PREDICTED: Mus musculus predicted gene, EG435949 (EG435949), mRNA.	435949	chr7	20959841	20960759							148.679	29.0413	147.605	170.296	128.137	23.4064	43.6825	20.035
XM_488001	0.000429981	0.089091	2.67402	up	XM_488001	Gm5729	EG435951	PREDICTED: Mus musculus predicted gene, EG435951 (EG435951), mRNA.	435951	chr7	21918229	21920358							228.685	85.6004	254.343	225.435	206.277	74.2599	90.6215	91.9198
XM_618764	0.00563333	0.165477	2.97349	up	XM_618764	4933403O03Rik	-	PREDICTED: Mus musculus RIKEN cDNA 4933403O03 gene (4933403O03Rik), mRNA.	74399	chr10	57690604	57695423							390.635	134.109	464.039	370.931	336.936	91.9565	164.852	145.519
XM_620170	0.0278893	0.271461	2.46937	up	XM_620170	Gm5862	EG545739	PREDICTED: Mus musculus predicted gene, EG545739, transcript variant 1 (EG545739), mRNA.	545739	chr5	26344939	26349476							197.091	74.775	203.723	275.89	111.659	78.7473	75.1408	70.4368
XM_620848	0.00232259	0.125352	2.36122	up	XM_620848	Gm5926	EG546205	PREDICTED: Mus musculus predicted gene, EG546205 (EG546205), mRNA.	546205	chrX	30822371	30824055							194.921	82.2562	163.085	192.944	228.735	83.2457	92.5942	70.9288
XM_622379	0.025331	0.262598	2.39633	up	XM_622379	EG545802	-	PREDICTED: Mus musculus predicted gene, EG545802 (EG545802), mRNA.	545802	chr5	121670207	121704753							95.7173	38.277	138.108	62.8107	86.2336	44.0138	39.7296	31.0876
XM_884246	0.0131485	0.211294	2.71499	up	XM_884246	Gm6121	-	PREDICTED: Mus musculus novel protein similar to Xlr-related, meiosis regulated (Xmr), transcript variant 1 (LOC619991), mRNA.	619991	chrX	26339868	26362795							203.04	75.1397	266.831	183.691	158.597	91.2225	82.7224	51.4743
XM_885964	0.0171224	0.22817	2.29877	up	XM_885964	Gm6239	-	PREDICTED: Mus musculus similar to pheromone receptor V3R8 (LOC621561), mRNA.	621561	chr7	22103962	22104880							127.817	55.753	145.142	145.351	92.9572	48.8527	73.3587	45.0475
XM_886523	0.0418526	0.312215	3.47226	up	XM_886523	Usp35	Gm1088,Gm493	PREDICTED: Mus musculus ubiquitin specific peptidase 35, transcript variant 3 (Usp35), mRNA.	244144	chr7	104458762	104474474							120.945	39.1846	168.304	97.6774	96.853	20.3178	26.442	70.794
XM_888144	0.045798	0.322359	4.31264	up	XM_888144	Gm5709	EG435732	PREDICTED: Mus musculus predicted gene, EG435732 (EG435732), mRNA.	435732	chr3	59406374	59422730							132.443	25.2293	46.8567	101.553	248.92	18.6357	33.1445	23.9076
XM_888689	0.0499397	0.332126	2.2718	up	XM_888689	Gm12241	OTTMUSG00000005702	PREDICTED: Mus musculus similar to OPR (LOC624168), mRNA.	624168	chr11	56272187	56276076							87.4417	41.3593	103.106	79.1418	80.0771	63.3042	36.9446	23.829
XM_888715	0.00458066	0.155724	6.03758	up	XM_888715	Gm6482	EG624191	PREDICTED: Mus musculus predicted gene, EG624191 (EG624191), mRNA.	624191	chr14	42216173	42221564							258.318	44.7625	263.609	322.157	189.188	47.6525	61.8771	24.758
XM_890970	0.0310146	0.281328	2.10139	up	XM_890970	Vmn2r49	-	PREDICTED: Mus musculus similar to putative pheromone receptor, transcript variant 1 (LOC625605), mRNA.	625605	chr7	10560639	10577604							227.728	109.101	233.841	168.742	280.6	134.714	116.676	75.9129
XM_891604	0.0125555	0.210171	5.19165	up	XM_891604	Gm6401	EG623168	PREDICTED: Mus musculus predicted gene, EG623168 (EG623168), mRNA.	623168	chr14	42541514	42546756							284.149	59.549	395.394	223.527	233.528	41.8213	102.376	34.4497
XM_892685	0.0304732	0.278265	2.60423	up	XM_892685	Gm6818	EG627975	PREDICTED: Mus musculus predicted gene, EG627975 (EG627975), mRNA.	627975	chr7	39184027	39192903							357.619	129.583	435.266	444.779	192.811	155.812	117.287	115.65
XM_897466	0.00379786	0.145177	2.66451	up	XM_897466	Gm6383	EG623011	PREDICTED: Mus musculus predicted gene, EG623011 (EG623011), mRNA.	623011	chr16	89237650	89237797							633.598	237.737	505.416	754.75	640.63	221.141	292.039	200.031
XM_898397	0.0259825	0.2639	2.49262	up	XM_898397	Smok3c	EG622486	PREDICTED: Mus musculus sperm motility kinase 3C, transcript variant 2 (Smok3c), mRNA.	622486	chr5	138494437	138507770							99.0014	40.2807	95.5433	129.338	72.1232	36.0775	56.5643	28.2003
XM_899013	0.0211091	0.244101	2.67935	up	XM_899013	Vmn2r33	-	PREDICTED: Mus musculus vomeronasal receptor Vmn2r33, transcript variant 2 (Vmn2r33), mRNA.	624512	chr7	7503677	7519497							257.538	99.942	303.003	268.223	201.387	106.053	133.812	59.9611
XM_899156	0.0462239	0.323228	2.91758	up	XM_899156	Vmn2r44	EG434113	PREDICTED: Mus musculus predicted gene, EG434113, transcript variant 2 (EG434113), mRNA.	434113	chr7	9744079	9759858							319.452	117.064	218.928	396.26	343.167	55.7423	129.898	165.55
XM_924640	0.00311358	0.134053	2.01117	up	XM_924640	Gm7288	EG640223	PREDICTED: Mus musculus predicted gene, EG640223 (EG640223), mRNA.	640223	chr7	149426248	149426983							2092.68	1043.56	2279.4	2174.57	1824.07	1202.12	891.785	1036.76
XM_972614	0.00203749	0.123197	5.15105	up	XM_972614	Gm7339	-	PREDICTED: Mus musculus hypothetical LOC664788 (LOC664788), mRNA.	664788	chr7	67012078	67039437							442.787	90.6505	450.907	437.823	439.632	130.794	81.8146	59.3433
XM_973024	0.0126239	0.210307	2.10702	up	XM_973024	Gm7347	EG664804	PREDICTED: Mus musculus predicted gene, EG664804, transcript variant 3 (EG664804), mRNA.	664804	chr5	26376315	26385125							190.279	93.1154	192.944	194.994	182.9	74.2273	127.216	77.9032
XM_973092	0.00811696	0.186739	3.53673	up	XM_973092	Gm7373	EG664859	PREDICTED: Mus musculus predicted gene, EG664859 (EG664859), mRNA.	664859	chr8	57996504	57998072							161.108	44.101	236.816	128.126	118.383	33.4784	45.3788	53.4458
XM_973693	0.00535852	0.163425	3.90995	up	XM_973693	Gm7406	EG664919	PREDICTED: Mus musculus predicted gene, EG664919 (EG664919), mRNA.	664919	chr9	6354116	6356872							863.831	217.393	845.105	1162.22	584.164	170.229	199.978	281.972
XM_977914	0.00347806	0.137957	4.50425	up	XM_977914	Gm7697	EG665578	PREDICTED: Mus musculus predicted gene, EG665578 (EG665578), mRNA.	665578	chr8	71997407	72046711							566.076	131.674	521.513	646.386	530.328	177.449	80.3255	137.248
XM_978513	0.0477713	0.327423	2.90604	up	XM_978513	Gm7735	EG665661	PREDICTED: Mus musculus predicted gene, EG665661 (EG665661), mRNA.	665661	chr16	89169734	89169893							792.803	304.096	702.681	953.468	722.261	449.533	133.026	329.73
XM_979177	0.0420692	0.312937	3.62495	up	XM_979177	Gm7767	EG665748	PREDICTED: Mus musculus predicted gene, EG665748 (EG665748), mRNA.	665748	chr11	17365386	17370369							1037.12	254.694	542.933	670.268	1898.16	199.594	198.544	365.945
XM_979220	0.00330952	0.137656	4.18098	up	XM_979220	Gm7771	-	PREDICTED: Mus musculus similar to zinc finger protein 197 (LOC665753), mRNA.	665753	chr13	65480483	65516054							331.831	80.2485	406.808	249.277	339.409	104.202	80.171	56.3727
XM_979370	0.0188962	0.234192	2.40176	up	XM_979370	Gm7592	EG665338	PREDICTED: Mus musculus predicted gene, EG665338, transcript variant 2 (EG665338), mRNA.	665338	chr1	87435699	87448757							202.74	81.4596	222.084	127.79	258.345	93.8775	70.209	80.2922
XM_980102	0.00028373	0.089091	2.08432	up	XM_980102	Thap6	4930534K21Rik,AI448650	PREDICTED: Mus musculus THAP domain containing 6 (Thap6), mRNA.	381650	chr5	92391907	92401163				Mm.392636///Mm.159453	TC1598599	ENSMUST00000094611	150.963	72.698	150.786	151.481	150.622	75.3962	64.1781	78.5196
XM_981055	0.00136314	0.106884	5.24044	up	XM_981055	Gm7896	-	PREDICTED: Mus musculus hypothetical LOC666027 (LOC666027), mRNA.	666027	chr13	66815591	66903500							294.755	56.3681	215.094	338.573	330.596	47.1707	74.0214	47.9121
XM_981856	0.00188296	0.119829	3.02684	up	XM_981856	Gm7945	EG666138	PREDICTED: Mus musculus predicted gene, EG666138 (EG666138), mRNA.	666138	chr14	42194916	42199642							133.071	44.1858	109.023	145.964	144.225	35.2031	44.3824	52.972
XM_982176	0.0174055	0.228417	2.69624	up	XM_982176	Gm7970	EG666186	PREDICTED: Mus musculus predicted gene, EG666186 (EG666186), mRNA.	666186	chr14	42363408	42368866							172.124	63.8515	198.506	202.514	115.354	87.6287	51.4125	52.5132
XM_982515	0.00967052	0.196147	4.64737	up	XM_982515	Gm7999	EG666239	PREDICTED: Mus musculus predicted gene, EG666239 (EG666239), mRNA.	666239	chr14	42935867	42949345							167.077	39.1264	190.343	166.786	144.101	45.0006	53.4191	18.9594
XM_982757	0.00866398	0.19102	4.2057	up	XM_982757	Gm8024	EG666285	PREDICTED: Mus musculus predicted gene, EG666285 (EG666285), mRNA.	666285	chr14	43098130	43103114							347.97	84.5809	476.158	315.846	251.906	126.22	58.2179	69.3044
XM_983023	0.00665806	0.173518	3.91401	up	XM_983023	Gm8042	EG666318	PREDICTED: Mus musculus predicted gene, EG666318 (EG666318), mRNA.	666318	chr14	43261884	43275364							133.494	35.91	112.363	130.793	157.326	31.832	22.8241	53.074
XM_983279	0.00204543	0.123375	4.38973	up	XM_983279	1700091H14Rik	-	PREDICTED: Mus musculus RIKEN cDNA 1700091H14 gene (1700091H14Rik), mRNA.	73553	chr14	43426784	43432274							164.766	39.0939	156.513	180.608	157.178	31.7636	55.9774	29.5408
XM_983444	0.00123732	0.106392	3.18089	up	XM_983444	Gm8068	EG666376	PREDICTED: Mus musculus predicted gene, EG666376 (EG666376), mRNA.	666376	chr14	43617987	43623472							150.54	47.5711	128.446	149.417	173.756	45.3788	57.8981	39.4364
XM_983581	0.0101357	0.198697	3.32681	up	XM_983581	Gm8082	EG666396	PREDICTED: Mus musculus predicted gene, EG666396 (EG666396), mRNA.	666396	chr14	43666416	43672298							183.512	56.1542	214.261	207.742	128.534	80.6411	45.0571	42.7643
XM_984060	0.00436989	0.152295	4.25516	up	XM_984060	Gm8122	EG666471	PREDICTED: Mus musculus predicted gene, EG666471 (EG666471), mRNA.	666471	chr14	43908364	43913837							433.344	101.57	407.836	311.298	580.898	92.6889	136.196	75.8268
XM_984157	0.00714784	0.17746	3.0922	up	XM_984157	Gm8127	EG666485	PREDICTED: Mus musculus predicted gene, EG666485 (EG666485), mRNA.	666485	chr14	43968757	43972336							195.299	65.4582	198.78	222.953	164.165	54.5548	93.6614	48.1584
XM_984287	0.0012204	0.106392	4.62415	up	XM_984287	Gm8138	EG666502	PREDICTED: Mus musculus predicted gene, EG666502 (EG666502), mRNA.	666502	chr14	44089359	44094877							144.357	31.0638	165.112	106.228	161.731	29.6859	25.2858	38.2198
XM_985112	0.00401963	0.147552	4.16711	up	XM_985112	Gm8207	EG666638	PREDICTED: Mus musculus predicted gene, EG666638 (EG666638), mRNA.	666638	chr14	44715966	44718264							165.674	41.163	168.249	191.729	137.043	48.6479	25.4009	49.4403
XM_985247	0.0333392	0.288701	2.36103	up	XM_985247	Gm8220	EG666660	PREDICTED: Mus musculus predicted gene, EG666660 (EG666660), mRNA.	666660	chr14	44863254	44868733							131.935	56.5781	148.84	156.038	90.9273	60.595	36.4052	72.7342
XM_985370	0.015085	0.219441	2.5179	up	XM_985370	Gm8232	EG666678	PREDICTED: Mus musculus predicted gene, EG666678 (EG666678), mRNA.	666678	chr14	45052781	45058224							161.664	63.6944	219.25	125.683	140.06	48.3869	81.0373	61.659
XM_986074	0.00349845	0.137957	2.83386	up	XM_986074	Gm8297	EG666800	PREDICTED: Mus musculus predicted gene, EG666800, transcript variant 4 (EG666800), mRNA.	666800	chr14	5086959	5095437							136.978	47.8078	175.855	124.334	110.746	39.1501	51.4125	52.8608
XM_987009	0.00614187	0.169828	4.12359	up	XM_987009	Gm8362	EG666918	PREDICTED: Mus musculus predicted gene, EG666918, transcript variant 3 (EG666918), mRNA.	666918	chr14	7598472	7606927							153.662	39.6496	131.086	163.728	166.172	60.1972	33.616	25.1357
XM_988064	0.012938	0.211294	3.62387	up	XM_988064	Gm8442	EG667067	PREDICTED: Mus musculus predicted gene, EG667067 (EG667067), mRNA.	667067	chr7	20685281	20687430							332.081	99.8291	371.535	313.016	311.692	57.3518	83.9666	158.169
XM_988960	0.0162525	0.226128	2.91786	up	XM_988960	Gm8509	EG667199	PREDICTED: Mus musculus predicted gene, EG667199 (EG667199), mRNA.	667199	chr7	22133032	22135478							147.49	51.9191	165.657	170.901	105.91	45.5649	74.7599	35.4325
XM_990209	0.011857	0.206868	3.31842	up	XM_990209	Gm14757	EG667379,OTTMUSG00000017900	PREDICTED: Mus musculus predicted gene, EG667379 (EG667379), mRNA.	667379	chrX	71922556	71924241							194.854	55.0405	215.631	261.505	107.427	52.6649	52.49	59.9667
XM_992237	0.00315408	0.134053	2.9896	up	XM_992237	Gm8799	EG667761	PREDICTED: Mus musculus predicted gene, EG667761 (EG667761), mRNA.	667761	chr10	32726686	32731179							1574.24	527.694	1629.66	1848.58	1244.48	588.936	591.098	403.048
XM_994881	0.0455374	0.321697	2.73	up	XM_994881	Gm8286	EG666784	PREDICTED: Mus musculus predicted gene, EG666784 (EG666784), mRNA.	666784	chr1	129981036	129985908							190.543	72.1631	231.714	222.715	117.2	54.7666	114.189	47.5337
Z32767	0.0314384	0.282157	2.04713	up	Z32767	Rad52	Rad52yh	M.musculus (B6/CBAF1J) mRNA for RAD52 homologue.	19365	chr6	119852731	119872846	GO:0000724(double-strand break repair via homologous recombination);GO:0006281(DNA repair);GO:0006310(DNA recombination);GO:0006974(response to DNA damage stimulus)	GO:0005634(nucleus)	GO:0005515(protein binding)	Mm.149	TC1591663///TC1578460	ENSMUST00000032269	231.347	110.348	318.254	208.425	167.364	86.6891	122.017	122.339
AB012601	0.00133133	0.106884	6.04703	down	AB012601	Arntl	Arnt3,BMAL1b,Bmal1,MOP3,bHLHe5,bmal1b	Mus musculus mRNA for BMAL1b', complete cds.	11865	chr7	120424163	120457636	GO:0000060(protein import into nucleus, translocation);GO:0000160(two-component signal transduction system (phosphorelay));GO:0006350(transcription);GO:0006355(regulation of transcription, DNA-dependent);GO:0007165(signal transduction);GO:0007623(circadian rhythm);GO:0042176(regulation of protein catabolic process);GO:0045449(regulation of transcription)	GO:0005634(nucleus)	GO:0000155(two-component sensor activity);GO:0003677(DNA binding);GO:0003700(transcription factor activity);GO:0004871(signal transducer activity);GO:0004872(receptor activity);GO:0005515(protein binding);GO:0030528(transcription regulator activity)	Mm.440371	TC1577063	ENSMUST00000084703	115.341	681.161	145.873	124.115	76.0344	564.393	826.705	652.386
AB014889	0.000484219	0.089091	4.56055	down	AB014889	Nr4a2	HZF-3,NOT,Nurr1,RNR-1,TINOR,TINUR	Mus musculus mRNA for Nurr2, complete cds.	18227	chr2	56960566	56976413	GO:0006350(transcription);GO:0006355(regulation of transcription, DNA-dependent);GO:0007399(nervous system development);GO:0030182(neuron differentiation);GO:0042053(regulation of dopamine metabolic process);GO:0045944(positive regulation of transcription from RNA polymerase II promoter)	GO:0005634(nucleus)	GO:0003677(DNA binding);GO:0003700(transcription factor activity);GO:0003707(steroid hormone receptor activity);GO:0004872(receptor activity);GO:0004879(ligand-dependent nuclear receptor activity);GO:0005515(protein binding);GO:0008270(zinc ion binding);GO:0046872(metal ion binding)	Mm.3507	TC1598298	ENSMUST00000028166	520.179	2347.22	397.528	565.92	597.09	2424.45	2036.02	2581.19
AF038896	0.019521	0.237845	3.20801	down	AF038896	Pde4d	9630011N22Rik,Dpde3	Mus musculus cyclic AMP specific phosphodiesterase PDE4D5A mRNA, partial cds.	238871	chr13	110051005	110724169	GO:0006198(cAMP catabolic process);GO:0006939(smooth muscle contraction);GO:0007165(signal transduction)		GO:0003824(catalytic activity);GO:0004114(3',5'-cyclic-nucleotide phosphodiesterase activity);GO:0016787(hydrolase activity);GO:0046872(metal ion binding)	Mm.434429	TC1594887///NP049127///TC1585860///TC1593636	ENSMUST00000079975	49.219	144.338	76.3456	44.8554	26.456	136.188	140.458	156.368
AF163668	0.00777682	0.182932	2.25718	down	AF163668	Rorc	Nr1f3,RORgamma,TOR,Thor	Mus musculus RORgamma t mRNA, complete cds.	19885	chr3	94181381	94202510	GO:0006350(transcription);GO:0006355(regulation of transcription, DNA-dependent);GO:0006468(protein amino acid phosphorylation);GO:0030154(cell differentiation);GO:0048535(lymph node development)	GO:0005634(nucleus)	GO:0003677(DNA binding);GO:0003700(transcription factor activity);GO:0003707(steroid hormone receptor activity);GO:0004872(receptor activity);GO:0004879(ligand-dependent nuclear receptor activity);GO:0008270(zinc ion binding);GO:0046872(metal ion binding)	Mm.4372	TC1582154	ENSMUST00000029795	487.959	1093.2	616.213	449.376	398.289	1145.69	1243.96	889.942
AF177755	0.0425782	0.314284	2.55543	down	AF177755	Ing1	2610028J21Rik,AA407184,AI875420,mING1h,p33Ing1,p37Ing1b	alt '2610028J21Rik#AA407184#AI875420#mING1h#p33Ing1#p37Ing1b'	26356	chr8	11555854	11563250	GO:0006355(regulation of transcription, DNA-dependent);GO:0007049(cell cycle);GO:0045786(negative regulation of progression through cell cycle);GO:0045941(positive regulation of transcription)	GO:0005634(nucleus)	GO:0003677(DNA binding);GO:0005515(protein binding);GO:0008270(zinc ion binding);GO:0016563(transcriptional activator activity);GO:0046872(metal ion binding)	Mm.25709	TC1575017///TC1686633	ENSMUST00000054399	436.88	1012.65	412.407	223.587	674.646	1020.97	991.669	1025.32
AF188008	0.0288244	0.273673	2.11621	down	AF188008	Plec1	AA591047,AU042537,EBS1,PCN,PLTN	Mus musculus plectin isoform plec 1,2alpha (Plec1) mRNA, partial cds.	18810	chr15	76017040	76036751	GO:0006471(protein amino acid ADP-ribosylation)	GO:0005626(insoluble fraction);GO:0005634(nucleus);GO:0005856(cytoskeleton);GO:0043292(contractile fiber)	GO:0003779(actin binding);GO:0003950(NAD+ ADP-ribosyltransferase activity);GO:0005198(structural molecule activity);GO:0008270(zinc ion binding)	Mm.234912///Mm.373750	NP163601///NP163593///TC1711572///TC1577000	ENSMUST00000074834///ENSMUST00000076442///ENSMUST00000075689	44.8573	94.4165	31.1077	52.9902	50.474	73.3106	121.183	88.7557
AF201287	0.00175507	0.115866	2.33345	down	AF201287	Tsc22d3	DIP,Dsip1,Gilz,TSC-22R,Tilz3	Mus musculus TSC22-related inducible leucine zipper 3a (Tilz3a) mRNA, complete cds.	14605	chrX	137074067	137077134	GO:0006355(regulation of transcription, DNA-dependent);GO:0006916(anti-apoptosis)		GO:0003700(transcription factor activity)	Mm.22216	TC1589724///TC1780107	ENSMUST00000055738	958.562	2219.58	1146.56	918.426	810.697	2308.99	2355.08	1994.66
AF217484	0.00532218	0.163348	2.45753	down	AF217484	Isg20	1600023I01Rik,2010107M23Rik,20kDa,DnaQL,HEM45	Mus musculus DnaQL mRNA, complete cds.	57444	chr7	86058343	86065193		GO:0005622(intracellular);GO:0005634(nucleus)	GO:0003723(RNA binding);GO:0004518(nuclease activity);GO:0004527(exonuclease activity);GO:0008859(exoribonuclease II activity);GO:0016787(hydrolase activity);GO:0030145(manganese ion binding);GO:0046872(metal ion binding)	Mm.322843	TC1581457	ENSMUST00000038142	126.158	316.02	111.272	139.324	127.879	416.098	260.409	271.551
AF250294	0.00239763	0.126629	2.1631	down	AF250294	Park2	MGC130518,PRKN	alt 'MGC130518#PRKN'	50873	chr17	11033249	11750100	GO:0006464(protein modification process);GO:0006508(proteolysis);GO:0006512(ubiquitin cycle);GO:0007612(learning);GO:0007626(locomotory behavior);GO:0019538(protein metabolic process);GO:0035249(synaptic transmission, glutamatergic);GO:0042415(norepinephrine metabolic process);GO:0042417(dopamine metabolic process);GO:0046928(regulation of neurotransmitter secretion);GO:0050804(regulation of syna…	GO:0005634(nucleus);GO:0005783(endoplasmic reticulum);GO:0043005(neuron projection)	GO:0004197(cysteine-type endopeptidase activity);GO:0004842(ubiquitin-protein ligase activity);GO:0005515(protein binding);GO:0008270(zinc ion binding);GO:0016874(ligase activity);GO:0046872(metal ion binding)	Mm.311110	TC1589817///TC1595243///NP238014	ENSMUST00000066658///ENSMUST00000097411	102.524	219.28	92.3546	125.793	89.4238	232.649	213.742	211.448
AF345952	0.000737463	0.098334	2.26335	down	AF345952	Dusp16	3830417M17Rik,AW558566,D6Ertd213e,MKP-7,MKP7,Mkpm	Mus musculus map kinase phosphatase-M A2 isoform mRNA, complete cds.	70686	chr6	134665490	134742646	GO:0000188(inactivation of MAPK activity);GO:0006470(protein amino acid dephosphorylation)	GO:0005634(nucleus);GO:0005737(cytoplasm)	GO:0005515(protein binding);GO:0016301(kinase activity);GO:0016787(hydrolase activity);GO:0016791(phosphoric monoester hydrolase activity);GO:0017017(MAP kinase phosphatase activity)	Mm.3994	NP395659	ENSMUST00000065273	564.69	1268.87	522.759	506.537	664.775	1231.74	1265.72	1309.14
AJ311667	9.05673e-05	0.0713968	2.78093	down	AJ311667	Crem	ICER	Mus musculus mRNA for induced cAMP early repressor, ICER I (CREM gene).	12916	chr18	3266353	3281732	GO:0006350(transcription);GO:0006355(regulation of transcription, DNA-dependent);GO:0007283(spermatogenesis)	GO:0005634(nucleus);GO:0005667(transcription factor complex)	GO:0003677(DNA binding);GO:0003700(transcription factor activity);GO:0005515(protein binding);GO:0046983(protein dimerization activity)	Mm.5244	TC1641765///TC1709879///TC1593768///TC1624922///NP059702	ENSMUST00000073545///ENSMUST00000025070	453.905	1260.06	461.674	491.577	408.464	1211.78	1347.1	1221.32
AK002328	0.0339674	0.290138	2.10282	down	AK002328	0610008F07Rik	-	Mus musculus adult male kidney cDNA, RIKEN full-length enriched library, clone:0610008F07 product:unclassifiable, full insert sequence.	68314	chr2	163319543	163367456				Mm.46190	TC1623432	ENSMUST00000060310	49.9718	100.918	54.726	30.8932	64.2962	87.271	112.884	102.6
AK002513	0.019947	0.239347	2.16192	down	AK002513	Nr1h4	AI957360,Fxr,HRR1,RIP14,Rxrip14	Mus musculus adult male kidney cDNA, RIKEN full-length enriched library, clone:0610010O18 product:nuclear receptor subfamily 1, group H, member 4, full insert sequence.	20186	chr10	88917122	88969372	GO:0006350(transcription);GO:0006355(regulation of transcription, DNA-dependent);GO:0008206(bile acid metabolic process)	GO:0005634(nucleus)	GO:0003677(DNA binding);GO:0003700(transcription factor activity);GO:0003707(steroid hormone receptor activity);GO:0004872(receptor activity);GO:0004879(ligand-dependent nuclear receptor activity);GO:0005515(protein binding);GO:0008270(zinc ion binding);GO:0046872(metal ion binding)	Mm.3095	TC1582434	ENSMUST00000058126	115.749	240.862	157.666	111.004	78.5782	222.106	257.601	242.88
AK002569	0.00632612	0.171161	2.51599	down	AK002569	2610110G12Rik	0610011P08Rik,2610008K08Rik,3110080J08Rik	Mus musculus adult male kidney cDNA, RIKEN full-length enriched library, clone:0610011P08 product:0610011P08RIK PROTEIN, full insert sequence.	73242	chr17	36040275	36046684			GO:0008415(acyltransferase activity);GO:0016740(transferase activity)	Mm.273155	NP744378///TC1581726///NP744175	ENSMUST00000056034///ENSMUST00000061052	156.2	383.073	211.18	132.746	124.673	398.764	409.95	340.507
AK003844	0.0290952	0.274868	2.14989	down	AK003844	Pitpnc1	1110020B03Rik,5830436L09Rik,AI662802,AI851387,C330017I21Rik,Dnr411,MGC118005,RDGBB,RDGBB1,rdgB-beta	Mus musculus 18-day embryo whole body cDNA, RIKEN full-length enriched library, clone:1110020B03 product:RETINAL DEGENERATION B BETA homolog [Homo sapiens], full insert sequence.	71795	chr11	107069205	107198951	GO:0006810(transport);GO:0046488(phosphatidylinositol metabolic process)	GO:0005622(intracellular);GO:0005737(cytoplasm)	GO:0008526(phosphatidylinositol transporter activity)	Mm.439910	TC1583632///TC1617656///TC1597307///TC1582586	ENSMUST00000103064	489.534	1096.63	440.788	462.334	565.479	1542.85	1017.85	729.197
AK004584	0.0085641	0.190805	2.12259	down	AK004584	N/A	N/A	Mus musculus adult male lung cDNA, RIKEN full-length enriched library, clone:1200003N03 product:glucocorticoid-induced leucine zipper, full insert sequence.	N/A	chrX	137074075	137077724							579.829	1247.69	504.329	639.023	596.135	1391.76	1424.77	926.538
AK004624	0.000961511	0.0994854	3.04593	down	AK004624	Mbd1	Cxxc3,PCM1	Mus musculus adult male lung cDNA, RIKEN full-length enriched library, clone:1200007A08 product:methyl-CpG binding domain protein 1, full insert sequence.	17190	chr18	74427957	74442339	GO:0006306(DNA methylation);GO:0006350(transcription);GO:0006355(regulation of transcription, DNA-dependent)	GO:0000785(chromatin);GO:0000792(heterochromatin);GO:0005634(nucleus)	GO:0003677(DNA binding);GO:0008270(zinc ion binding);GO:0046872(metal ion binding)	Mm.22522	TC1699912///TC1727829///TC1588047	ENSMUST00000025446	1921.45	5839.48	2249.4	1907.35	1607.61	5528.07	5168.38	6821.98
AK006232	0.0253353	0.262598	2.83651	down	AK006232	1700027D21Rik	1700022B01Rik,AA062323	Mus musculus adult male testis cDNA, RIKEN full-length enriched library, clone:1700022B01 product:hypothetical protein, full insert sequence.	76573	chr10	76025016	76032945			GO:0005515(protein binding)	Mm.45611	TC1587090	ENSMUST00000009259	64.8553	177.438	87.7035	69.4286	37.4338	199.594	206.519	126.202
AK006330	0.00602567	0.168608	2.44707	down	AK006330	Gpr160	1700025D19Rik,GPCR150	Mus musculus adult male testis cDNA, RIKEN full-length enriched library, clone:1700025D19 product:weakly similar to PUTATIVE G PROTEIN-COUPLED RECEPTOR [Homo sapiens], full insert sequence.	71862	chr3	30754871	30796087	GO:0007165(signal transduction);GO:0007186(G-protein coupled receptor protein signaling pathway)	GO:0016020(membrane);GO:0016021(integral to membrane)	GO:0001584(rhodopsin-like receptor activity);GO:0004871(signal transducer activity);GO:0004872(receptor activity);GO:0004930(G-protein coupled receptor activity)	Mm.272019	TC1583275	ENSMUST00000046748	180.222	439.8	179.27	219.44	141.956	388.541	387.867	542.993
AK006523	0.000221471	0.085544	2.82443	down	AK006523	1700019D03Rik	2410136C24Rik,AA410151,MGC58779	Mus musculus adult male testis cDNA, RIKEN full-length enriched library, clone:1700030B07 product:RIKEN cDNA 1700019D03 gene, full insert sequence.	67080	chr1	52981970	53020104				Mm.236287	TC1633537	ENSMUST00000050567	2394.29	6722.68	2734.75	2077.78	2370.35	6468.47	6787.77	6911.8
AK007348	0.0295556	0.276163	2.10333	down	AK007348	Derl3	1810006I20Rik,1810063P04Rik,IZP6,MGC118672,MGC144274,MGC144275,derlin-3	Mus musculus 10 day old male pancreas cDNA, RIKEN full-length enriched library, clone:1810006I20 product:hypothetical Der1-like domain/Phenylalanine-rich region profile containing protein, full insert sequence.	70377	chr10	75356142	75358686	GO:0030968(unfolded protein response)	GO:0005783(endoplasmic reticulum);GO:0016020(membrane);GO:0016021(integral to membrane);GO:0030176(integral to endoplasmic reticulum membrane)	GO:0005515(protein binding)	Mm.275878	TC1581102	ENSMUST00000009236	74.4962	151.351	47.3831	81.7514	94.354	133.544	174.896	145.612
AK008995	0.000386446	0.089091	3.76089	down	AK008995	Dgat1	C75990,D15Ertd23e,Dgat	Mus musculus adult male tongue cDNA, RIKEN full-length enriched library, clone:2300001D04 product:diacylglycerol acyltransferase 1, full insert sequence.	13350	chr15	76332444	76333610		GO:0005624(membrane fraction);GO:0005783(endoplasmic reticulum);GO:0016020(membrane);GO:0016021(integral to membrane)	GO:0003846(2-acylglycerol O-acyltransferase activity);GO:0004144(diacylglycerol O-acyltransferase activity);GO:0008415(acyltransferase activity);GO:0016740(transferase activity)	Mm.22633	TC1716114///TC1579105	ENSMUST00000023214	4587.76	17411.3	5052.86	4354.64	4355.8	13835.4	18867.6	19530.8
AK009175	0.0361426	0.296599	2.83567	down	AK009175	Snhg12	2310005L22Rik	Mus musculus adult male tongue cDNA, RIKEN full-length enriched library, clone:2310005L22 product:unclassifiable, full insert sequence.	100039864	chr4	131864592	131866937							48.398	149.358	36.6674	55.6329	52.8938	247.685	89.9012	110.488
AK011172	0.0081954	0.187192	2.09318	down	AK011172	Nudt7	1300007B24Rik,2210404C19Rik	Mus musculus 10 days embryo whole body cDNA, RIKEN full-length enriched library, clone:2600009J04 product:nudix (nucleoside diphosphate linked moiety X)-type motif 7, full insert sequence.	67528	chr8	116657514	116676212	GO:0015938(coenzyme A catabolic process);GO:0046356(acetyl-CoA catabolic process)	GO:0005777(peroxisome)	GO:0000287(magnesium ion binding);GO:0003986(acetyl-CoA hydrolase activity);GO:0016787(hydrolase activity);GO:0030145(manganese ion binding);GO:0046872(metal ion binding)	Mm.27889	TC1581563///TC1591361	ENSMUST00000066514	12012.2	24943.2	14799.4	11589.3	9647.92	25833	28063.1	20933.6
AK011280	0.00379725	0.145177	2.40206	down	AK011280	Rabl3	4930553C05Rik,AA958834	Mus musculus 10 days embryo whole body cDNA, RIKEN full-length enriched library, clone:2610002D21 product:hypothetical RAS small GTPases, Rab subfamily/ATP/GTP-binding site motif A (P-loop)/Sigma-54 factor interaction domain containing protein, full insert sequence.	67657	chr16	37539979	37572471	GO:0000160(two-component signal transduction system (phosphorelay));GO:0006355(regulation of transcription, DNA-dependent);GO:0007264(small GTPase mediated signal transduction)	GO:0005622(intracellular)	GO:0003677(DNA binding);GO:0005524(ATP binding);GO:0005525(GTP binding);GO:0008134(transcription factor binding)	Mm.28158	TC1580569	ENSMUST00000023524	124.787	302.483	144.281	116.31	113.77	310.966	360.328	236.153
AK012411	0.00658955	0.17348	2.40717	down	AK012411	Serpinf1	AI195227,EPC-1,Pedf,Pedfl,Sdf3	Mus musculus 11 days embryo whole body cDNA, RIKEN full-length enriched library, clone:2700051P09 product:serine (or cysteine) proteinase inhibitor, clade F (alpha-2 antiplasmin, pigment epithelium derived factor). member 1, full insert sequence.	20317	chr11	75228971	75236125	GO:0016525(negative regulation of angiogenesis);GO:0050769(positive regulation of neurogenesis)	GO:0005576(extracellular region);GO:0005615(extracellular space)	GO:0004867(serine-type endopeptidase inhibitor activity)	Mm.2044	TC1572018///TC1628078	ENSMUST00000000769	204.155	481.267	146.307	217.541	248.616	427.254	504.399	512.149
AK012787	0.00481648	0.157772	2.89981	down	AK012787	Yaf2	2810021M11Rik	Mus musculus 10, 11 days embryo whole body cDNA, RIKEN full-length enriched library, clone:2810021M11 product:YY1 associated factor 2, full insert sequence.	67057	chr15	93114328	93166911	GO:0006350(transcription);GO:0006355(regulation of transcription, DNA-dependent);GO:0008150(biological_process);GO:0016481(negative regulation of transcription);GO:0045941(positive regulation of transcription)	GO:0005622(intracellular);GO:0005634(nucleus)	GO:0003674(molecular_function);GO:0003713(transcription coactivator activity);GO:0003714(transcription corepressor activity);GO:0005515(protein binding);GO:0008270(zinc ion binding);GO:0046872(metal ion binding)	Mm.4714	TC1578782	ENSMUST00000080299	43.7292	129.26	44.4367	49.7115	37.0393	153.238	144.345	90.1987
AK014061	0.0156622	0.223112	2.38714	down	AK014061	Map3k6	Ask2,MAPKKK6,MEKK6,MGC159280	Mus musculus 13 days embryo head cDNA, RIKEN full-length enriched library, clone:3110018G10 product:mitogen-activated protein kinase kinase kinase 6, full insert sequence.	53608	chr4	132806763	132808843	GO:0006468(protein amino acid phosphorylation);GO:0007165(signal transduction);GO:0007257(activation of JNK activity)		GO:0004672(protein kinase activity);GO:0004674(protein serine/threonine kinase activity);GO:0004709(MAP kinase kinase kinase activity);GO:0005524(ATP binding);GO:0016301(kinase activity)	Mm.36640	TC1583361	ENSMUST00000030677	141.985	340.877	110.283	136.054	179.618	429.306	245.552	347.773
AK015083	0.0170957	0.22817	2.55415	down	AK015083	Lyrm1	1110065L10Rik,2310004B22Rik,4930404J24Rik	Mus musculus adult male testis cDNA, RIKEN full-length enriched library, clone:4930404J24 product:hypothetical protein, full insert sequence.	73919	chr7	127039374	127100477				Mm.46381	TC1593914		64.0554	168.957	51.7894	67.5444	72.8323	205.225	196.233	105.412
AK017087	0.0142436	0.216983	2.73798	down	AK017087	Cpvl	4933436L16Rik,HVLP	Mus musculus adult male testis cDNA, RIKEN full-length enriched library, clone:4933436L16 product:similar to CARBOXYPEPTIDASE, VITELLOGENIC-LIKE [Homo sapiens], full insert sequence.	71287	chr6	53823272	53928667	GO:0006508(proteolysis)	GO:0005615(extracellular space)	GO:0004180(carboxypeptidase activity);GO:0004185(serine carboxypeptidase activity)	Mm.158654	TC1596043	ENSMUST00000065084	54.9052	143.307	81.9276	40.7872	42.0007	167.668	134.747	127.506
AK017185	0.0143635	0.217122	2.62934	down	AK017185	Rab30	5033421K01Rik,AI323892,Rsb30	Mus musculus 11 days pregnant adult female ovary and uterus cDNA, RIKEN full-length enriched library, clone:5033421K01 product:RAB30 (Rab30) mRNA, full insert sequence.	75985	chr7	99968414	99985627	GO:0006886(intracellular protein transport);GO:0007264(small GTPase mediated signal transduction);GO:0015031(protein transport)	GO:0016020(membrane)	GO:0000166(nucleotide binding);GO:0005525(GTP binding)	Mm.389966	TC1581625	ENSMUST00000032879	100.593	255.337	63.042	127.29	111.448	261.86	290.282	213.867
AK017465	0.00639382	0.17145	2.15523	down	AK017465	Tiam1	AI847750,D16Ium10,D16Ium10e	Mus musculus 6 days embryo whole body cDNA, RIKEN full-length enriched library, clone:5630400J05 product:T-cell lymphoma invasion and metastasis 1, full insert sequence.	21844	chr16	89897778	89961072	GO:0007165(signal transduction);GO:0007242(intracellular signaling cascade);GO:0007264(small GTPase mediated signal transduction);GO:0035023(regulation of Rho protein signal transduction);GO:0048013(ephrin receptor signaling pathway);GO:0050772(positive regulation of axonogenesis)	GO:0005622(intracellular);GO:0005886(plasma membrane)	GO:0005057(receptor signaling protein activity);GO:0005085(guanyl-nucleotide exchange factor activity);GO:0005089(Rho guanyl-nucleotide exchange factor activity);GO:0005515(protein binding);GO:0005543(phospholipid binding);GO:0046875(ephrin receptor binding)	Mm.124100	TC1576020	ENSMUST00000002588	41.3773	89.829	37.2045	48.6889	38.2386	79.8971	112.313	77.2767
AK017516	0.00694791	0.175249	2.27557	down	AK017516	Snx21	5730407K14Rik,AI481716	Mus musculus 8 days embryo whole body cDNA, RIKEN full-length enriched library, clone:5730407K14 product:hypothetical protein, full insert sequence.	101113	chr2	164611323	164613132	GO:0007154(cell communication)		GO:0005515(protein binding);GO:0035091(phosphoinositide binding)	Mm.295647	TC1681332///TC1613881///TC1627535	ENSMUST00000056181	88.8521	205.671	98.4819	77.6643	90.41	267.713	182.781	166.52
AK017715	0.00200289	0.12196	2.66694	down	AK017715	Sltm	5730455C01Rik,5730555F13Rik,9130215G10Rik,Met	Mus musculus 8 days embryo whole body cDNA, RIKEN full-length enriched library, clone:5730490E06 product:hypothetical RNA-binding region RNP-1 (RNA recognition motif) containing protein, full insert sequence.	66660	chr9	70390584	70427862			GO:0000166(nucleotide binding);GO:0003676(nucleic acid binding)	Mm.22379	TC1729463///TC1600796///TC1672031	ENSMUST00000049263	134.234	351.587	130.917	167.232	104.552	361.727	352.873	340.162
AK018212	0.00613539	0.169828	2.00642	down	AK018212	Usp16	1200004E02Rik,2810483I07Rik,6330514E22Rik,UBPM	Mus musculus adult male medulla oblongata cDNA, RIKEN full-length enriched library, clone:6330514E22 product:hypothetical Ubiquitin carboxyl-terminal hydrolase family 2 containing protein, full insert sequence.	74112	chr16	87455300	87471201	GO:0005975(carbohydrate metabolic process);GO:0006511(ubiquitin-dependent protein catabolic process)		GO:0004221(ubiquitin thiolesterase activity);GO:0004553(hydrolase activity, hydrolyzing O-glycosyl compounds);GO:0008233(peptidase activity);GO:0008270(zinc ion binding)	Mm.152941	TC1650803///TC1574805	ENSMUST00000026710	43.7385	88.6084	44.1079	48.3216	38.786	80.3804	109.763	75.6817
AK018948	0.0383986	0.302987	2.73188	down	AK018948	1700112J05Rik	1700110A09Rik	Mus musculus adult male testis cDNA, RIKEN full-length enriched library, clone:1700110A09 product:unclassifiable, full insert sequence.	68246	chr5	77435473	77447888				Mm.319633	TC1604749		51.0604	134.411	80.5055	37.9516	34.7242	123.959	94.375	184.9
AK021163	0.0234201	0.255079	3.62356	down	AK021163	Dzip1	2510025K24Rik,2810422M04Rik,mKIAA0996	Mus musculus 16 days embryo head cDNA, RIKEN full-length enriched library, clone:C130042I21 product:RIKEN cDNA 2810422M04 gene, full insert sequence.	66573	chr14	119288477	119312972	GO:0006350(transcription);GO:0006355(regulation of transcription, DNA-dependent);GO:0007275(multicellular organismal development);GO:0007281(germ cell development);GO:0007283(spermatogenesis);GO:0030154(cell differentiation)	GO:0005622(intracellular);GO:0005634(nucleus);GO:0005737(cytoplasm);GO:0043234(protein complex)	GO:0003676(nucleic acid binding);GO:0003677(DNA binding);GO:0005515(protein binding);GO:0008270(zinc ion binding);GO:0046872(metal ion binding)	Mm.425921	TC1578708///TC1606029///TC1594071	ENSMUST00000047208///ENSMUST00000004055	31.1593	116.054	44.5198	28.6884	20.2698	179.555	68.5846	100.021
AK028100	0.0163423	0.226544	2.01702	down	AK028100	Adk	2310026J05Rik,5033405D03Rik,AI255373,AI987814,Ak,MGC6593	Mus musculus 10 day old male pancreas cDNA, RIKEN full-length enriched library, clone:1810013H19 product:RIKEN cDNA 2310026J05 gene, full insert sequence.	11534	chr14	21871854	21873143	GO:0006166(purine ribonucleoside salvage)	GO:0005634(nucleus)	GO:0000287(magnesium ion binding);GO:0004001(adenosine kinase activity);GO:0016301(kinase activity);GO:0016740(transferase activity);GO:0046872(metal ion binding)	Mm.188734	TC1574102	ENSMUST00000045376	186.195	374.004	141.077	219.308	198.201	442.32	381.429	298.261
AK029847	0.00252974	0.129015	2.00478	down	AK029847	Fam129a	AI256368,AU019833,Niban	Mus musculus adult male testis cDNA, RIKEN full-length enriched library, clone:4931412A05 product:niban protein, full insert sequence.	63913	chr1	153524296	153566166	GO:0008150(biological_process)	GO:0005575(cellular_component)	GO:0003674(molecular_function)	Mm.157700	TC1579652	ENSMUST00000086267	2523.56	5060.92	2655.87	2175.01	2739.8	5747.3	4455.68	4979.79
AK029933	0.014333	0.216983	2.34471	down	AK029933	Hdac4	4932408F19Rik,AI047285	Mus musculus adult male testis cDNA, RIKEN full-length enriched library, clone:4932408F19 product:Similar to histone deacetylase 4 homolog [Homo sapiens], full insert sequence.	208727	chr1	93829331	93903432	GO:0000122(negative regulation of transcription from RNA polymerase II promoter);GO:0001501(skeletal development);GO:0006350(transcription);GO:0006355(regulation of transcription, DNA-dependent);GO:0008285(negative regulation of cell proliferation);GO:0016568(chromatin modification);GO:0045892(negative regulation of transcription, DNA-dependent)	GO:0005634(nucleus)	GO:0003677(DNA binding);GO:0005515(protein binding);GO:0016564(transcriptional repressor activity);GO:0016787(hydrolase activity)	Mm.318567	TC1609771	ENSMUST00000074984	324.803	781.092	276.89	377.125	320.394	791.348	1015.01	536.919
AK031587	0.0498855	0.332126	4.61434	down	AK031587	Lsp1	Lsp-1,WP34,p50,pp52	Mus musculus 13 days embryo male testis cDNA, RIKEN full-length enriched library, clone:6030456M18 product:lymphocyte specific 1, full insert sequence.	16985	chr7	149657747	149674276	GO:0006915(apoptosis);GO:0006935(chemotaxis);GO:0006936(muscle contraction);GO:0006952(defense response);GO:0007010(cytoskeleton organization and biogenesis);GO:0007165(signal transduction)		GO:0003779(actin binding);GO:0004871(signal transducer activity);GO:0005516(calmodulin binding);GO:0017022(myosin binding)	Mm.234003	TC1594075	ENSMUST00000038946	41.4458	146.622	87.344	20.6602	16.3333	192.655	139.326	107.885
AK032015	0.00543271	0.163643	2.18076	down	AK032015	Gpr172b	2010003P03Rik,D15Ertd747e,GPCR,GPCR42,PAR2	Mus musculus adult male medulla oblongata cDNA, RIKEN full-length enriched library, clone:6330545F04 product:RIKEN cDNA 2010003P03 gene, full insert sequence.	52710	chr15	76369372	76372558		GO:0005615(extracellular space);GO:0016020(membrane);GO:0016021(integral to membrane)	GO:0004872(receptor activity)	Mm.28597	NP582370	ENSMUST00000023220	134.38	291.565	118.729	118.425	165.986	343.683	273.667	257.344
AK033745	0.0329388	0.287817	2.60953	down	AK033745	N/A	N/A	Mus musculus adult male epididymis cDNA, RIKEN full-length enriched library, clone:9230101G17 product:unclassifiable, full insert sequence.	N/A	chr9	35493009	35494975							72.4968	202.788	83.2373	69.8123	64.4407	265.495	237.206	105.661
AK033794	0.0238647	0.25701	2.59196	down	AK033794	Zbtb11	9230110G02Rik,ZNF-U69274	Mus musculus adult male epididymis cDNA, RIKEN full-length enriched library, clone:9230110G02 product:hypothetical ATP/GTP-binding site motif A (P-loop)/Zinc finger, C2H2 type containing protein, full insert sequence.	271377	chr16	55989078	56006463		GO:0005622(intracellular)	GO:0003676(nucleic acid binding);GO:0008270(zinc ion binding);GO:0046872(metal ion binding)	Mm.391619	TC1652115///TC1776225///TC1703970	ENSMUST00000050248	91.1406	238.827	124.923	77.4852	71.0132	174.855	200.928	340.698
AK035652	0.00394211	0.146636	2.8861	down	AK035652	Dusp16	3830417M17Rik,AW558566,D6Ertd213e,MKP-7,MKP7,Mkpm	Mus musculus adult male urinary bladder cDNA, RIKEN full-length enriched library, clone:9530081F05 product:dual specificity phosphatase 16, full insert sequence.	70686	chr6	134687494	134741352	GO:0000188(inactivation of MAPK activity);GO:0006470(protein amino acid dephosphorylation)	GO:0005634(nucleus);GO:0005737(cytoplasm)	GO:0005515(protein binding);GO:0016301(kinase activity);GO:0016787(hydrolase activity);GO:0016791(phosphoric monoester hydrolase activity);GO:0017017(MAP kinase phosphatase activity)	Mm.3994	NP395659	ENSMUST00000065273	72.0596	205.064	82.791	81.4499	51.938	171.34	211.372	232.482
AK035993	0.0377889	0.300904	2.11059	down	AK035993	Sema4f	-	Mus musculus 16 days neonate cerebellum cDNA, RIKEN full-length enriched library, clone:9630025H20 product:sema domain, immunoglobulin domain (Ig), TM domain, and short cytoplasmic domain, full insert sequence.	20355	chr6	82866215	82889695	GO:0007275(multicellular organismal development);GO:0007399(nervous system development);GO:0030154(cell differentiation);GO:0030517(negative regulation of axon extension);GO:0031290(retinal ganglion cell axon guidance)	GO:0000299(integral to membrane of membrane fraction);GO:0005886(plasma membrane);GO:0016020(membrane);GO:0016021(integral to membrane);GO:0019717(synaptosome);GO:0045202(synapse);GO:0045211(postsynaptic membrane)	GO:0004872(receptor activity);GO:0005515(protein binding)	Mm.270543	TC1582071	ENSMUST00000000641	122.153	242.129	91.0291	186.665	88.7647	249.787	242.341	234.26
AK037053	0.0073868	0.179888	4.29506	down	AK037053	9930104L06Rik	MGC107426	Mus musculus adult female vagina cDNA, RIKEN full-length enriched library, clone:9930104L06 product:similar to HYPOTHETICAL PROTEIN FLJ20508 [Homo sapiens], full insert sequence.	194268	chr4	124614301	124616698							28.7061	118.571	43.2257	24.0052	18.8874	116.011	151.139	88.5633
AK037166	0.0167961	0.227217	2.52957	down	AK037166	B3gnt5	beta3GnT5	Mus musculus 6 days neonate skin cDNA, RIKEN full-length enriched library, clone:A030003O20 product:UDP-GlcNAc:betaGal beta-1,3-N-acetylglucosaminyltransferase 5, full insert sequence.	108105	chr16	19760326	19772393	GO:0006486(protein amino acid glycosylation);GO:0007417(central nervous system development);GO:0009247(glycolipid biosynthetic process);GO:0030148(sphingolipid biosynthetic process)	GO:0005622(intracellular);GO:0016020(membrane);GO:0016021(integral to membrane)	GO:0008378(galactosyltransferase activity);GO:0008457(beta-galactosyl-N-acetylglucosaminylgalactosylglucosyl-ceramide beta-1,3-acetylglucosaminyltransferase activity);GO:0008917(lipopolysaccharide N-acetylglucosaminyltransferase activity);GO:0016740(transferase activity);GO:0016757(transferase activity, transferring glycosyl groups)	Mm.33935	NP385789///TC1611287	ENSMUST00000079780	78.7708	197.484	53.0374	90.0964	93.1786	253.843	185.826	152.783
AK038916	0.016033	0.225614	3.16063	down	AK038916	Cep120	A230075C01,AU016693,Ccdc100	Mus musculus adult male hypothalamus cDNA, RIKEN full-length enriched library, clone:A230075C01 product:hypothetical C2 domain (Calcium/lipid-binding domain, CaLB) structure containing protein, full insert sequence.	225523	chr18	53845148	53904201				Mm.193678	TC1596287///TC1617576///TC1596918///TC1592139///TC1776578	ENSMUST00000091898///ENSMUST00000049811	54.2079	167.844	75.6761	52.4852	34.4624	117.954	169.814	215.763
AK039160	0.0020839	0.124161	2.08876	down	AK039160	9230109A22Rik	-	Mus musculus adult male hypothalamus cDNA, RIKEN full-length enriched library, clone:A230103J20 product:hypothetical protein, full insert sequence.	223413	chr15	25067284	25168585				Mm.446182	TC1591695	ENSMUST00000056401	512.181	1067.19	435.194	526.964	574.385	1207.08	996.423	998.051
AK039679	0.0286361	0.27285	3.43815	down	AK039679	C130071C03Rik	2810449C10Rik	Mus musculus adult male spinal cord cDNA, RIKEN full-length enriched library, clone:A330084J11 product:unclassifiable, full insert sequence.	320203	chr13	83867710	83875274				Mm.245636///Mm.443920	TC1581727	ENSMUST00000052354	36.2071	125.412	41.189	20.6339	46.7985	132.354	70.4015	173.48
AK040398	0.0373898	0.29953	2.50164	down	AK040398	N/A	N/A	Mus musculus 0 day neonate thymus cDNA, RIKEN full-length enriched library, clone:A430091I20 product:unclassifiable, full insert sequence.	N/A	chr7	29559917	29566533							75.9563	177.638	69.8193	114.702	43.3474	179.826	145.8	207.287
AK041032	0.015825	0.224522	2.2233	down	AK041032	Sik2	G630080D20Rik,Snf1lk2	Mus musculus adult male aorta and vein cDNA, RIKEN full-length enriched library, clone:A530064K17 product:similar to PROBABLE SERINE/THREONINE PROTEIN KINASE SNF1LK (EC 2.7.1.-) (SALT-INDUCIBLE PROTEIN KINASE) (PROTEIN KINASE KID2) [Rattus norvegicus], full insert sequence.	235344	chr9	50741940	50817178	GO:0006468(protein amino acid phosphorylation);GO:0007243(protein kinase cascade);GO:0008286(insulin receptor signaling pathway);GO:0046626(regulation of insulin receptor signaling pathway)	GO:0005634(nucleus);GO:0005737(cytoplasm)	GO:0000166(nucleotide binding);GO:0000287(magnesium ion binding);GO:0004672(protein kinase activity);GO:0004674(protein serine/threonine kinase activity);GO:0005524(ATP binding);GO:0016301(kinase activity);GO:0016740(transferase activity);GO:0046872(metal ion binding)	Mm.104932	TC1587735	ENSMUST00000041375	119.885	257.175	166.897	105.477	87.281	251.965	281.434	238.125
AK042116	0.0209556	0.243733	2.05023	down	AK042116	Ralgapa1	2310003F20Rik,4930400K19Rik,AI563624,GRIPE,Garnl1,Tulip1,mKIAA0884	Mus musculus 3 days neonate thymus cDNA, RIKEN full-length enriched library, clone:A630059L24 product:CDNA FLJ12926 FIS, CLONE NT2RP2004732, WEAKLY SIMILAR TO NEUROFILAMENT TRIPLET M PROTEIN homolog [Homo sapiens], full insert sequence.	56784	chr12	56813454	56922154	GO:0045449(regulation of transcription);GO:0051056(regulation of small GTPase mediated signal transduction)	GO:0005622(intracellular);GO:0005634(nucleus);GO:0005737(cytoplasm)	GO:0005096(GTPase activator activity);GO:0005098(Ran GTPase activator activity);GO:0005515(protein binding);GO:0008270(zinc ion binding);GO:0046872(metal ion binding)	Mm.292180	TC1604669///TC1720580	ENSMUST00000085385	71.8679	144.073	81.2323	85.2752	49.0962	126.324	139.11	166.786
AK043046	0.0160645	0.225614	4.17585	down	AK043046	Herpud2	5031400M07Rik,AB041580	Mus musculus 7 days neonate cerebellum cDNA, RIKEN full-length enriched library, clone:A730050F22 product:hypothetical protein, full insert sequence.	80517	chr9	24951298	24956197	GO:0006464(protein modification process);GO:0006986(response to unfolded protein)	GO:0016020(membrane);GO:0016021(integral to membrane)		Mm.142843	TC1575177///NP1282441	ENSMUST00000008573	42.7491	199.517	47.5232	34.0022	46.7218	344.512	113.732	140.306
AK043137	0.000333509	0.089091	3.89717	down	AK043137	Depdc5	AV016528,D5Ertd477e,KIAA0645,mKIAA0645	Mus musculus 7 days neonate cerebellum cDNA, RIKEN full-length enriched library, clone:A730059B08 product:KIAA0645 PROTEIN (WUGSC:H_DJ403E2.1 PROTEIN) homolog [Homo sapiens], full insert sequence.	277854	chr5	33206369	33230316	GO:0007242(intracellular signaling cascade);GO:0008150(biological_process)	GO:0005575(cellular_component)	GO:0003674(molecular_function)	Mm.101524///Mm.439888	TC1602000///TC1687582///TC1601901	ENSMUST00000046788///ENSMUST00000049780	39.9194	156.509	36.6332	45.1385	37.9866	134.939	146.444	188.144
AK043531	0.0361479	0.296599	2.11748	down	AK043531	H2afy	H2AF12M,mH2a1,macroH2A1	Mus musculus 10 days neonate cortex cDNA, RIKEN full-length enriched library, clone:A830006E17 product:unclassifiable, full insert sequence.	26914	chr13	56103625	56186210	GO:0006334(nucleosome assembly);GO:0007001(chromosome organization and biogenesis (sensu Eukaryota));GO:0007549(dosage compensation);GO:0016568(chromatin modification)	GO:0000786(nucleosome);GO:0000793(condensed chromosome);GO:0001740(Barr body);GO:0005634(nucleus);GO:0005694(chromosome);GO:0005813(centrosome)	GO:0003677(DNA binding);GO:0003682(chromatin binding)	Mm.283802	TC1572896///TC1587401///TC1594670	ENSMUST00000045788///ENSMUST00000016081	136.12	275.243	202.269	99.8748	106.217	247.92	324.874	252.934
AK043826	0.0100562	0.198355	2.50641	down	AK043826	Tulp4	1110057P05Rik,2210038L17Rik,Tusp	Mus musculus 10 days neonate cortex cDNA, RIKEN full-length enriched library, clone:A830037L14 product:unclassifiable, full insert sequence.	68842	chr17	6106829	6138792	GO:0007242(intracellular signaling cascade);GO:0008150(biological_process)	GO:0005737(cytoplasm)	GO:0003674(molecular_function)	Mm.28251	TC1698161///TC1573015	ENSMUST00000039655	66.2041	166.497	61.4351	83.733	53.4441	121.774	177.93	199.788
AK044263	0.039938	0.306912	2.97826	down	AK044263	Dnahc9	9030022M04,A230091C01,C230051G16,D11Ertd686e,DNAH9,KIAA0357,mKIAA0357	Mus musculus adult retina cDNA, RIKEN full-length enriched library, clone:A930004F07 product:inferred: CILIARY DYNEIN HEAVY CHAIN (AXONEMAL DYNEIN HEAVY CHAIN) (DYNEIN HEAVY CHAIN 9). [Human] {Homo sapie, full insert sequence.	237806	chr11	65972253	65982053	GO:0000226(microtubule cytoskeleton organization and biogenesis);GO:0007018(microtubule-based movement);GO:0008150(biological_process)	GO:0000922(spindle pole);GO:0005815(microtubule organizing center);GO:0030286(dynein complex);GO:0035085(cilium axoneme)	GO:0000166(nucleotide binding);GO:0003674(molecular_function);GO:0003777(microtubule motor activity);GO:0005524(ATP binding);GO:0016887(ATPase activity)	Mm.400552///Mm.264210	TC1597319///TC1588553///TC1600972	ENSMUST00000017541///ENSMUST00000080665	36.4916	106.996	20.4139	53.0809	35.98	73.1009	159.616	88.2705
AK044414	0.0336717	0.289319	2.58043	down	AK044414	A930011G23Rik	-	Mus musculus adult retina cDNA, RIKEN full-length enriched library, clone:A930011G23 product:hypothetical protein, full insert sequence.	319818	chr5	99804044	100158081		GO:0019028(viral capsid)	GO:0005198(structural molecule activity)	Mm.295233	TC1606776///TC1621785		83.8918	220.149	88.2317	107.064	56.3801	137.429	303.926	219.09
AK044521	0.00300187	0.133251	3.04797	down	AK044521	Tbc1d30	4930505D03Rik	Mus musculus adult retina cDNA, RIKEN full-length enriched library, clone:A930018M07 product:hypothetical RabGAP/TBC domain containing protein, full insert sequence.	74694	chr10	120701208	120748072		GO:0005622(intracellular)	GO:0005097(Rab GTPase activator activity)	Mm.233833	TC1633741///TC1584938	ENSMUST00000064107	546.953	1621.05	376.197	631.705	632.957	1631.58	1600	1631.58
AK044670	0.00440391	0.152837	2.76896	down	AK044670	D16Ertd472e	1700010I10Rik,2310009O17Rik,AI256766,AW536354,E330003K22Rik	Mus musculus adult retina cDNA, RIKEN full-length enriched library, clone:A930031E11 product:weakly similar to EURL PROTEIN [Gallus gallus], full insert sequence.	67102	chr16	78544249	78576933				Mm.37332///Mm.391859	TC1614073///TC1579755///TC1589676	ENSMUST00000023571	30.741	85.6755	31.4106	36.0005	24.8118	63.843	96.4678	96.7157
AK044689	0.0468957	0.324763	2.58888	down	AK044689	A930033H14Rik	-	Mus musculus adult retina cDNA, RIKEN full-length enriched library, clone:A930033H14 product:unclassifiable, full insert sequence.	320700	chr10	68672509	68675846				Mm.396529	TC1586984		154.822	380.435	242.069	90.4695	131.926	328.47	518.466	294.368
AK045668	0.0485518	0.329773	3.24974	down	AK045668	Sdcbp	MDA-9,Sycl,syntenin-1	Mus musculus adult male corpora quadrigemina cDNA, RIKEN full-length enriched library, clone:B230219O13 product:unclassifiable, full insert sequence.	53378	chr4	6292826	6301275	GO:0006612(protein targeting to membrane);GO:0006930(substrate-bound cell migration, cell extension);GO:0007242(intracellular signaling cascade);GO:0007265(Ras protein signal transduction);GO:0007268(synaptic transmission);GO:0008152(metabolic process);GO:0030036(actin cytoskeleton organization and biogenesis)	GO:0005634(nucleus);GO:0005856(cytoskeleton);GO:0005895(interleukin-5 receptor complex);GO:0005912(adherens junction);GO:0016020(membrane)	GO:0005137(interleukin-5 receptor binding);GO:0005515(protein binding);GO:0008093(cytoskeletal adaptor activity);GO:0016491(oxidoreductase activity);GO:0042043(neurexin binding);GO:0045545(syndecan binding);GO:0046982(protein heterodimerization activity)	Mm.247473	TC1573740///TC1621300	ENSMUST00000103008	30.727	91.5145	54.2011	17.2953	20.6845	56.1941	117.941	100.408
AK047845	0.0353047	0.293779	2.49664	down	AK047845	Dyrk1a	2310043O08Rik,D16Ertd272e,D16Ertd493e,Dyrk,ENSMUSG00000074897,Gm10783,MGC150253,MGC150254,Mnbh,Mp86,mmb	Mus musculus 16 days embryo head cDNA, RIKEN full-length enriched library, clone:C130005F20 product:dual-specificity tyrosine-(Y)-phosphorylation regulated kinase 1a, full insert sequence.	13548	chr16	94890411	94901128	GO:0006468(protein amino acid phosphorylation);GO:0018108(peptidyl-tyrosine phosphorylation);GO:0046777(protein amino acid autophosphorylation)	GO:0005634(nucleus);GO:0016607(nuclear speck)	GO:0000166(nucleotide binding);GO:0004672(protein kinase activity);GO:0004674(protein serine/threonine kinase activity);GO:0004713(protein-tyrosine kinase activity);GO:0004715(non-membrane spanning protein tyrosine kinase activity);GO:0005515(protein binding);GO:0005524(ATP binding);GO:0016301(kinase activity);GO:0016740(transferase activity)	Mm.310973	TC1627821///TC1687400///TC1582103	ENSMUST00000023614	154.658	412.041	189.552	142.749	131.674	649.756	268.232	318.134
AK049009	0.00867276	0.19102	2.73305	down	AK049009	Xpo6	2610005L19Rik,AI854665,AL022631,C230091E20Rik,R75304,Ranbp20,mKIAA0370	Mus musculus 0 day neonate cerebellum cDNA, RIKEN full-length enriched library, clone:C230091E20 product:RANBP20 homolog [Mus musculus], full insert sequence.	74204	chr7	133261984	133343922	GO:0000059(protein import into nucleus, docking);GO:0006611(protein export from nucleus);GO:0006810(transport);GO:0006886(intracellular protein transport);GO:0015031(protein transport)	GO:0005634(nucleus);GO:0005643(nuclear pore);GO:0005737(cytoplasm)	GO:0005488(binding);GO:0005515(protein binding);GO:0008565(protein transporter activity)	Mm.235663	NP569202	ENSMUST00000009344	43.8999	115.785	31.1672	39.2806	61.2519	101.974	129.067	116.316
AK049843	0.019221	0.23608	3.34579	down	AK049843	Spock3	2900045C01Rik,AI428471,KIAA4039,mKIAA4039	Mus musculus adult male hippocampus cDNA, RIKEN full-length enriched library, clone:C630003A13 product:TESTICAN-3 PROTEIN PRECURSOR (2900045C01RIK PROTEIN) homolog [Mus musculus], full insert sequence.	72902	chr8	65430028	65835893		GO:0005578(proteinaceous extracellular matrix);GO:0005615(extracellular space)	GO:0004857(enzyme inhibitor activity);GO:0005509(calcium ion binding);GO:0008191(metalloendopeptidase inhibitor activity)	Mm.334552	TC1595827	ENSMUST00000093480	24.1406	85.4809	20.1957	30.8558	21.3702	98.9978	112.767	44.6777
AK050487	0.011999	0.207289	2.78619	down	AK050487	2210009G21Rik	2410004I22Rik,C85661	Mus musculus adult pancreas islet cells cDNA, RIKEN full-length enriched library, clone:C820003H20 product:RIKEN cDNA 2210009G21 gene, full insert sequence.	74243	chr2	136731278	136895514				Mm.330612	TC1601442///TC1641421///TC1593356	ENSMUST00000028737///ENSMUST00000099312///ENSMUST00000099311	43.2769	126.285	38.1897	44.9191	46.7218	123.251	175.427	80.1757
AK052680	0.0389779	0.304287	2.40601	down	AK052680	Tns3	BC023928,F830010I22Rik,TEM6,Tens1	Mus musculus 0 day neonate kidney cDNA, RIKEN full-length enriched library, clone:D630022K11 product:hypothetical protein, full insert sequence.	319939	chr11	8445695	8564538	GO:0007242(intracellular signaling cascade);GO:0008284(positive regulation of cell proliferation);GO:0016311(dephosphorylation);GO:0016477(cell migration);GO:0048286(alveolus development)		GO:0016791(phosphoric monoester hydrolase activity)	Mm.337820	TC1598210///TC1711939///TC1603735	ENSMUST00000101530///ENSMUST00000020695	91.0011	203.549	137.034	84.3269	51.6419	178.47	205.039	227.137
AK052776	0.00639126	0.17145	2.03933	down	AK052776	Paqr5	0610010I15Rik,AV002411,BB115488,MGC118370,mPRg	Mus musculus 0 day neonate kidney cDNA, RIKEN full-length enriched library, clone:D630049G09 product:hypothetical protein, full insert sequence.	74090	chr9	61801544	61874597		GO:0016020(membrane);GO:0016021(integral to membrane)	GO:0004872(receptor activity);GO:0005496(steroid binding);GO:0008289(lipid binding)	Mm.273267	TC1591458///TC1579883	ENSMUST00000034817	370.577	761.883	335.429	353.49	422.812	859.81	595.715	830.125
AK053039	0.0205196	0.241829	3.03655	down	AK053039	Chl1	A530023M13Rik,AI465420,CALL,LICAM2	Mus musculus 15 days embryo head cDNA, RIKEN full-length enriched library, clone:D930030E07 product:close homolog of L1, full insert sequence.	12661	chr6	103461323	103641671	GO:0001764(neuron migration);GO:0007155(cell adhesion);GO:0007156(homophilic cell adhesion);GO:0007275(multicellular organismal development);GO:0007399(nervous system development);GO:0007411(axon guidance);GO:0007610(behavior);GO:0030154(cell differentiation);GO:0031175(neurite development)	GO:0005578(proteinaceous extracellular matrix);GO:0016020(membrane);GO:0016021(integral to membrane);GO:0030425(dendrite);GO:0045177(apical part of cell)	GO:0005515(protein binding)	Mm.251288	TC1652011///TC1634954///TC1580155	ENSMUST00000066905	39.6162	110.958	25.4254	64.0724	29.3507	125.947	94.7878	112.139
AK076797	0.018825	0.233917	3.95074	down	AK076797	Crem	ICER	Mus musculus adult male testis cDNA, RIKEN full-length enriched library, clone:4930469D11 product:CAMP-RESPONSIVE ELEMENT MODULATOR homolog [Mus musculus], full insert sequence.	12916	chr18	3266353	3299552	GO:0006350(transcription);GO:0006355(regulation of transcription, DNA-dependent);GO:0007283(spermatogenesis)	GO:0005634(nucleus);GO:0005667(transcription factor complex)	GO:0003677(DNA binding);GO:0003700(transcription factor activity);GO:0005515(protein binding);GO:0046983(protein dimerization activity)	Mm.5244	TC1641765///TC1709879///TC1593768///TC1624922///NP059702	ENSMUST00000073545///ENSMUST00000025070	86.1868	333.995	49.5836	82.6937	126.283	407.981	396.742	197.262
AK076883	0.031552	0.282274	2.77752	down	AK076883	1700023L04Rik	-	Mus musculus adult male testis cDNA, RIKEN full-length enriched library, clone:4930534K23 product:unclassifiable, full insert sequence.	76419	chr6	29935330	29943776				Mm.84522	TC1616408	ENSMUST00000052497	59.8603	157.47	94.597	38.9014	46.0825	193.47	165.358	113.582
AK080000	0.0491013	0.331427	2.95194	down	AK080000	Il15ra	AA690181	Mus musculus adult male aorta and vein cDNA, RIKEN full-length enriched library, clone:A530045E03 product:interleukin 15 receptor, alpha chain, full insert sequence.	16169	chr2	11627162	11655589	GO:0007166(cell surface receptor linked signal transduction)	GO:0005615(extracellular space);GO:0005634(nucleus);GO:0005783(endoplasmic reticulum);GO:0005887(integral to plasma membrane);GO:0016020(membrane);GO:0016021(integral to membrane)	GO:0004872(receptor activity);GO:0004907(interleukin receptor activity);GO:0005515(protein binding)	Mm.200196	NP646214	ENSMUST00000078834	64.0561	169.283	113.067	35.8889	43.2122	132.526	222.041	153.283
AK080904	0.0067277	0.173932	3.23316	down	AK080904	Ttc39c	1700008N02Rik,2810439F02Rik	Mus musculus 4 days neonate male adipose cDNA, RIKEN full-length enriched library, clone:B430203J24 product:hypothetical Microbodies C-terminal targeting signal containing protein, full insert sequence.	72747	chr18	12802308	12847954				Mm.52526	TC1580109///TC1606887///TC1587651	ENSMUST00000025294	40.2734	123.923	34.3947	27.71	58.7155	135.346	118.299	118.123
AK081813	0.0428815	0.314914	2.44696	down	AK081813	Per1	MGC102121,Per,m-rigui,mPer1	Mus musculus 16 days embryo head cDNA, RIKEN full-length enriched library, clone:C130078P18 product:period homolog (Drosophila), full insert sequence.	18626	chr11	68908755	68919960	GO:0000160(two-component signal transduction system (phosphorelay));GO:0006350(transcription);GO:0006355(regulation of transcription, DNA-dependent);GO:0007165(signal transduction);GO:0007623(circadian rhythm);GO:0016481(negative regulation of transcription);GO:0048511(rhythmic process)	GO:0005634(nucleus)	GO:0000155(two-component sensor activity);GO:0004871(signal transducer activity);GO:0005515(protein binding)	Mm.7373	NP1487658	ENSMUST00000102605	83.4525	212.982	79.5454	62.0069	108.805	323.668	134.045	181.233
AK082507	0.00181379	0.117429	2.93134	down	AK082507	Hsf1	AA960185	Mus musculus 0 day neonate cerebellum cDNA, RIKEN full-length enriched library, clone:C230058A10 product:heat shock factor 1, full insert sequence.	15499	chr15	76307874	76331402	GO:0006350(transcription);GO:0006355(regulation of transcription, DNA-dependent);GO:0007283(spermatogenesis);GO:0008285(negative regulation of cell proliferation)	GO:0005634(nucleus);GO:0005737(cytoplasm);GO:0045120(pronucleus)	GO:0003677(DNA binding);GO:0003700(transcription factor activity)	Mm.347444	NP1487334///TC1608106	ENSMUST00000072838	280.183	815.491	259.099	347.238	234.212	895.951	868.156	682.365
AK082974	0.00282178	0.13031	2.27715	down	AK082974	Sgms1	9530058O11Rik,AI841905,C80702,MGC30540,MOB,SMS1,SMS1alpha1,SMS1alpha2,SMS1beta,SMS1gamma,Sor1,Tmem23	Mus musculus 12 days embryo spinal cord cDNA, RIKEN full-length enriched library, clone:C530027B15 product:HYPOTHETICAL 48.7 KDA PROTEIN homolog [Mus musculus], full insert sequence.	208449	chr19	32232745	32464204	GO:0006629(lipid metabolic process);GO:0006665(sphingolipid metabolic process);GO:0006686(sphingomyelin biosynthetic process);GO:0043066(negative regulation of apoptosis)	GO:0000138(Golgi trans cisterna);GO:0016020(membrane);GO:0016021(integral to membrane);GO:0030173(integral to Golgi membrane)	GO:0016301(kinase activity);GO:0016740(transferase activity);GO:0047493(ceramide cholinephosphotransferase activity)	Mm.329810	TC1704565///TC1576686	ENSMUST00000099514///ENSMUST00000087384	158.694	366.466	151.968	167.889	156.224	360.793	292.262	446.343
AK083150	0.00510553	0.160513	4.90533	down	AK083150	N/A	N/A	Mus musculus adult male hippocampus cDNA, RIKEN full-length enriched library, clone:C630018D16 product:unclassifiable, full insert sequence.	N/A	chr16	42884482	42912176							58.7208	275.085	37.9931	88.6015	49.5677	328.917	289.526	206.811
AK083394	0.000406473	0.089091	2.1089	down	AK083394	Cmah	-	Mus musculus 2 days neonate thymus thymic cells cDNA, RIKEN full-length enriched library, clone:C920028L09 product:cytidine monophospho-N-acetylneuraminic acid hydroxylase, full insert sequence.	12763	chr13	24508769	24562007	GO:0006118(electron transport);GO:0006810(transport);GO:0046381(CMP-N-acetylneuraminate metabolic process)	GO:0005737(cytoplasm);GO:0005783(endoplasmic reticulum);GO:0016020(membrane);GO:0045285(ubiquinol-cytochrome-c reductase complex)	GO:0005506(iron ion binding);GO:0008121(ubiquinol-cytochrome-c reductase activity);GO:0016491(oxidoreductase activity);GO:0030338(CMP-N-acetylneuraminate monooxygenase activity);GO:0046872(metal ion binding)	Mm.8396	TC1583321	ENSMUST00000050859	4331.24	9114.49	4848.38	4041.85	4103.5	9611.7	9233.46	8498.3
AK084998	0.0141111	0.216479	2.36483	down	AK084998	Abhd10	D230019K24Rik,D630018L06	Mus musculus 13 days embryo lung cDNA, RIKEN full-length enriched library, clone:D430022H17 product:hypothetical Esterase/lipase/thioesterase family active site containing protein, full insert sequence.	213012	chr16	45729845	45743017	GO:0006725(aromatic compound metabolic process)	GO:0005739(mitochondrion)	GO:0004252(serine-type endopeptidase activity);GO:0008233(peptidase activity);GO:0016787(hydrolase activity)	Mm.247453	NP859336///TC1580255	ENSMUST00000066983	58.7471	141.246	49.3386	71.7107	55.192	149.41	176.266	98.0622
AK085306	0.0251106	0.262031	2.86601	down	AK085306	Acer2	2410116I05Rik,Asah3l,CRG-L1,maCER2	Mus musculus 0 day neonate kidney cDNA, RIKEN full-length enriched library, clone:D630008P07 product:similar to CANCER RELATED GENE-LIVER 1 [Mus musculus], full insert sequence.	230379	chr4	86520367	86580726	GO:0006629(lipid metabolic process);GO:0006672(ceramide metabolic process)	GO:0000139(Golgi membrane);GO:0005789(endoplasmic reticulum membrane);GO:0016020(membrane);GO:0016021(integral to membrane)	GO:0016787(hydrolase activity);GO:0016811(hydrolase activity, acting on carbon-nitrogen (but not peptide) bonds, in linear amides);GO:0017040(ceramidase activity)	Mm.45019	TC1598986///TC1585840	ENSMUST00000045224///ENSMUST00000074334	89.4325	254.323	59.4512	126.478	82.3684	318.557	282.254	162.159
AK085438	0.0197221	0.238741	2.54831	down	AK085438	N/A	N/A	Mus musculus 0 day neonate kidney cDNA, RIKEN full-length enriched library, clone:D630025F22 product:unclassifiable, full insert sequence.	N/A	chr15	78404840	78412019							32.2879	86.2279	34.1413	26.5743	36.1482	128.272	69.7581	60.6537
AK086119	0.0156675	0.223112	2.13761	down	AK086119	Kcnt1	C030030G16Rik,Slack,mKIAA1422,slo2	Mus musculus 15 days embryo head cDNA, RIKEN full-length enriched library, clone:D930007B08 product:POTASSIUM CHANNEL SUBUNIT homolog [Rattus norvegicus], full insert sequence.	227632	chr2	25733380	25750695	GO:0006810(transport);GO:0006811(ion transport);GO:0006812(cation transport);GO:0006813(potassium ion transport)	GO:0016020(membrane);GO:0016021(integral to membrane)	GO:0005216(ion channel activity);GO:0005244(voltage-gated ion channel activity);GO:0005261(cation channel activity);GO:0005267(potassium channel activity);GO:0005509(calcium ion binding);GO:0015269(calcium-activated potassium channel activity);GO:0030955(potassium ion binding)	Mm.119462	TC1592901///TC1602967///TC1768168	ENSMUST00000037580	66.8811	139.227	90.1747	49.7348	60.7337	120.626	150.717	146.338
AK087495	4.94818e-05	0.064027	3.29383	down	AK087495	Nr4a2	HZF-3,NOT,Nurr1,RNR-1,TINOR,TINUR	Mus musculus 0 day neonate eyeball cDNA, RIKEN full-length enriched library, clone:E130306H12 product:nuclear receptor subfamily 4, group A, member 2, full insert sequence.	18227	chr2	56960566	56976413	GO:0006350(transcription);GO:0006355(regulation of transcription, DNA-dependent);GO:0007399(nervous system development);GO:0030182(neuron differentiation);GO:0042053(regulation of dopamine metabolic process);GO:0045944(positive regulation of transcription from RNA polymerase II promoter)	GO:0005634(nucleus)	GO:0003677(DNA binding);GO:0003700(transcription factor activity);GO:0003707(steroid hormone receptor activity);GO:0004872(receptor activity);GO:0004879(ligand-dependent nuclear receptor activity);GO:0005515(protein binding);GO:0008270(zinc ion binding);GO:0046872(metal ion binding)	Mm.3507	TC1598298	ENSMUST00000028166	631.247	2077.52	687.786	626.525	579.43	1912.75	2141.3	2178.52
AK087707	0.0347819	0.292437	2.46139	down	AK087707	Cfh	Mud-1,NOM,Sas-1,Sas1	Mus musculus 2 days pregnant adult female ovary cDNA, RIKEN full-length enriched library, clone:E330009L21 product:complement component factor h, full insert sequence.	12628	chr1	141982431	142079988	GO:0006955(immune response);GO:0006956(complement activation);GO:0006957(complement activation, alternative pathway);GO:0045087(innate immune response)			Mm.8655	TC1577292///NP059318///TC1590549	ENSMUST00000066859///ENSMUST00000094489///ENSMUST00000027612	184.647	421.386	263.595	190.646	99.6995	412.785	411.17	440.201
AK087886	0.0480229	0.328258	3.25774	down	AK087886	N/A	N/A	Mus musculus 2 days pregnant adult female ovary cDNA, RIKEN full-length enriched library, clone:E330036K19 product:CASP2 and RIPK1 domain containing adaptor with death domain, full insert sequence.	N/A	chr10	94780880	94786992							63.598	239.089	57.6377	73.1058	60.0505	256.203	368.371	92.6945
AK088191	0.00583035	0.166955	2.5349	down	AK088191	Nudt7	1300007B24Rik,2210404C19Rik	Mus musculus 2 days neonate thymus thymic cells cDNA, RIKEN full-length enriched library, clone:E430005O06 product:nudix (nucleoside diphosphate linked moiety X)-type motif 7, full insert sequence.	67528	chr8	116657514	116676212	GO:0015938(coenzyme A catabolic process);GO:0046356(acetyl-CoA catabolic process)	GO:0005777(peroxisome)	GO:0000287(magnesium ion binding);GO:0003986(acetyl-CoA hydrolase activity);GO:0016787(hydrolase activity);GO:0030145(manganese ion binding);GO:0046872(metal ion binding)	Mm.27889	TC1581563///TC1591361	ENSMUST00000066514	211.711	528.933	153.323	245.697	236.113	567.795	442.955	576.048
AK089473	0.0109778	0.203069	2.29019	down	AK089473	Lpl	-	Mus musculus B6-derived CD11 +ve dendritic cells cDNA, RIKEN full-length enriched library, clone:F730037C07 product:lipoprotein lipase, full insert sequence.	16956	chr8	71404453	71413578	GO:0006629(lipid metabolic process);GO:0016042(lipid catabolic process)	GO:0005615(extracellular space);GO:0016020(membrane);GO:0042627(chylomicron)	GO:0003824(catalytic activity);GO:0004465(lipoprotein lipase activity);GO:0005319(lipid transporter activity);GO:0008201(heparin binding);GO:0016787(hydrolase activity);GO:0048503(GPI anchor binding)	Mm.1514	TC1573803///TC1777349	ENSMUST00000081237	508.627	1126.43	699.023	447.376	379.482	1061.26	1148.82	1169.22
AK090096	0.00087526	0.0994854	2.0336	down	AK090096	Papola	Pap,PapIII,Plap	Mus musculus kidney CCL-142 RAG cDNA, RIKEN full-length enriched library, clone:G430111G08 product:POLY(A) POLYMERASE ALPHA (EC 2.7.7.19) (PAP) (POLYNUCLEOTIDE ADENYLYLTRANSFERASE ALPHA) homolog [Bos taurus], full insert sequence.	18789	chr12	107022911	107077149	GO:0006350(transcription);GO:0006397(mRNA processing)	GO:0005634(nucleus)	GO:0003676(nucleic acid binding);GO:0003723(RNA binding);GO:0004652(polynucleotide adenylyltransferase activity);GO:0016740(transferase activity);GO:0016779(nucleotidyltransferase activity)	Mm.255877	TC1576615///TC1600413///TC1618969	ENSMUST00000101063	854	1726.98	908.513	726.92	926.567	1676.43	1777.19	1727.3
AK129347	0.0364572	0.297229	2.04211	down	AK129347	Atpgd1	AI790298,mKIAA1394	Mus musculus mRNA for mKIAA1394 protein.	107239	chr19	4164323	4175454			GO:0000166(nucleotide binding);GO:0005524(ATP binding);GO:0016874(ligase activity)	Mm.329684	TC1583736		49.3381	102.827	47.9939	38.8411	61.1792	77.3248	143.827	87.3295
AK131707	0.0193279	0.237055	2.05145	down	AK131707	BC016423	AI645998,KIAA2006,MGC25933,Pap20,mKIAA2006	Mus musculus adult male testis cDNA, RIKEN full-length enriched library, clone:1700017K15 product:hypothetical Serine/threonine-specific protein phosphatase and bis(5-nucleosyl)-tetraphosphatase containing protein, full insert sequence.	105203	chr13	3565280	3584619			GO:0004872(receptor activity);GO:0016787(hydrolase activity)	Mm.221609	TC1583945///TC1597017	ENSMUST00000042415///ENSMUST00000096068///ENSMUST00000096069	84.3971	168.838	106.228	88.531	58.4327	191.587	151.835	163.092
AK132096	0.0107108	0.201099	2.43319	down	AK132096	4833442J19Rik	AI256744	Mus musculus 12 days embryo head cDNA, RIKEN full-length enriched library, clone:3021404L22 product:hypothetical SAM (and some other nucleotide) binding motif containing protein, full insert sequence.	320204	chr6	149090118	149099692	GO:0006479(protein amino acid methylation)	GO:0005737(cytoplasm)	GO:0008276(protein methyltransferase activity)	Mm.274099	TC1632836///TC1583855	ENSMUST00000047531	688.784	1670.16	865.006	680.427	520.919	2113.32	1540.31	1356.84
AK132234	0.00601395	0.168608	2.08817	down	AK132234	Sgk1	Sgk	Mus musculus adult male brain cDNA, RIKEN full-length enriched library, clone:3632410E02 product:serum/glucocorticoid regulated kinase, full insert sequence.	20393	chr10	21713756	21719695	GO:0006468(protein amino acid phosphorylation);GO:0006915(apoptosis);GO:0006974(response to DNA damage stimulus)	GO:0005634(nucleus);GO:0005783(endoplasmic reticulum)	GO:0000166(nucleotide binding);GO:0004672(protein kinase activity);GO:0004674(protein serine/threonine kinase activity);GO:0005515(protein binding);GO:0005524(ATP binding);GO:0016301(kinase activity);GO:0016740(transferase activity)	Mm.28405	TC1609075///TC1585076	ENSMUST00000020145	551.337	1163.59	574.349	599.164	480.497	1026.46	1005.37	1458.96
AK134303	0.0318498	0.28383	2.74666	down	AK134303	Megf6	2600001P17Rik,Egfl3,MGC49785	Mus musculus 13 days embryo male testis cDNA, RIKEN full-length enriched library, clone:6030403P15 product:EGF-like-domain, multiple 3, full insert sequence.	230971	chr4	153630133	153649293			GO:0005509(calcium ion binding)	Mm.275216	TC1578962///TC1733465	ENSMUST00000030897	39.7189	111.071	55.5519	34.8218	28.783	156.192	67.3577	109.662
AK134876	0.0373964	0.29953	4.17089	down	AK134876	C730027P07Rik	MGC130602	Mus musculus adult male olfactory brain cDNA, RIKEN full-length enriched library, clone:6430501L13 product:hypothetical protein, full insert sequence.	245050	chr9	121860137	121887803				Mm.71062	TC1593244	ENSMUST00000098269	46.4153	240.179	40.7667	49.3829	49.0962	464.953	157.897	97.687
AK135113	0.00601483	0.168608	2.3929	down	AK135113	2410089E03Rik	4732468D17Rik	Mus musculus adult male olfactory brain cDNA, RIKEN full-length enriched library, clone:6430599A19 product:hypothetical protein, full insert sequence.	73692	chr15	8144300	8152606				Mm.164436	TC1581936///TC1608418///TC1775543	ENSMUST00000044206	98.7902	232.257	108.901	115.861	71.6087	245.697	247.474	203.6
AK136634	0.00366955	0.142162	12.5883	down	AK136634	Myh13	MyHC-eo	Mus musculus adult male epididymis cDNA, RIKEN full-length enriched library, clone:9230014G19 product:Extraocular myosin heavy chain (Fragment) homolog [Homo sapiens], full insert sequence.	544791	chr11	67178286	67185004	GO:0007010(cytoskeleton organization and biogenesis)	GO:0005856(cytoskeleton);GO:0016459(myosin complex)	GO:0003774(motor activity);GO:0005524(ATP binding)	Mm.340163	TC1621424	ENSMUST00000081911	35.2984	465.167	53.0374	26.4017	26.456	605.18	210.661	579.661
AK136686	0.033832	0.289819	3.49334	down	AK136686	Chd2	2810013C04Rik,2810040A01Rik,5630401D06Rik,AI851092,BC029703	Mus musculus adult male epididymis cDNA, RIKEN full-length enriched library, clone:9230022P18 product:hypothetical protein, full insert sequence.	244059	chr7	80649873	80686632	GO:0008150(biological_process)	GO:0005575(cellular_component)	GO:0003674(molecular_function);GO:0004386(helicase activity)	Mm.432493///Mm.34955	TC1598477		55.6125	172.955	96.8735	41.9085	28.0556	198.832	125.601	194.432
AK137133	0.043365	0.316561	3.36321	down	AK137133	N/A	N/A	Mus musculus adult male urinary bladder cDNA, RIKEN full-length enriched library, clone:9530001H04 product:unclassifiable, full insert sequence.	N/A	chr6	83518032	83538117							28.805	107.852	40.2231	22.7381	23.4538	79.728	53.8852	189.944
AK139666	0.0309237	0.280601	2.34937	down	AK139666	1110034B05Rik	FLJ37953,MGC117744	Mus musculus 2 cells egg cDNA, RIKEN full-length enriched library, clone:B020009E24 product:hypothetical protein, full insert sequence.	68736	chr1	57450164	57463279				Mm.288490	TC1604256	ENSMUST00000097732	50.3202	111.238	28.0918	61.2519	61.617	107.316	111.527	114.871
AK139783	0.0397572	0.306329	2.41792	down	AK139783	Gtf2a2	12kDa,TfIIg	Mus musculus 2 cells egg cDNA, RIKEN full-length enriched library, clone:B020016N07 product:general transcription factor II A, 2, full insert sequence.	235459	chr9	69860356	69866028	GO:0006350(transcription);GO:0006355(regulation of transcription, DNA-dependent);GO:0006367(transcription initiation from RNA polymerase II promoter)	GO:0005634(nucleus);GO:0005672(transcription factor TFIIA complex)	GO:0003702(RNA polymerase II transcription factor activity);GO:0003743(translation initiation factor activity)	Mm.293117	TC1624618///TC1732871	ENSMUST00000036512	51.9035	133.874	42.8408	57.9846	54.8852	191.548	136.196	73.8775
AK139887	0.0424921	0.314097	2.47274	down	AK139887	Dsn1	1700022L09Rik,AW552447	Mus musculus 2 cells egg cDNA, RIKEN full-length enriched library, clone:B020032E04 product:hypothetical protein, full insert sequence.	66934	chr2	156821000	156832811	GO:0007049(cell cycle);GO:0007059(chromosome segregation);GO:0007067(mitosis);GO:0051301(cell division)	GO:0005634(nucleus)		Mm.25410	TC1577092	ENSMUST00000103130	81.72	217.795	93.7477	86.9392	64.4732	353.409	153.923	146.053
AK140325	0.00725702	0.178691	2.00872	down	AK140325	Sh2b2	Aps	Mus musculus 4 days neonate male adipose cDNA, RIKEN full-length enriched library, clone:B430112H10 product:adaptor protein with pleckstrin homology and src, full insert sequence.	23921	chr5	136694018	136720724	GO:0001922(B-1 B cell homeostasis);GO:0007242(intracellular signaling cascade);GO:0008286(insulin receptor signaling pathway);GO:0019221(cytokine and chemokine mediated signaling pathway);GO:0019222(regulation of metabolic process);GO:0030036(actin cytoskeleton organization and biogenesis);GO:0042593(glucose homeostasis);GO:0046325(negative regulation of glucose import);GO:0050776(regulation of i…	GO:0001725(stress fiber);GO:0001726(ruffle);GO:0005737(cytoplasm);GO:0005884(actin filament);GO:0005886(plasma membrane);GO:0016020(membrane)	GO:0005068(transmembrane receptor protein tyrosine kinase adaptor protein activity);GO:0005070(SH3/SH2 adaptor activity);GO:0005515(protein binding)	Mm.425294	TC1583710		191.537	386.095	160.403	215.287	198.921	403.542	444.023	310.721
AK141917	0.0418636	0.312215	2.36909	down	AK141917	Pde4dip	4732458A06Rik,9430063L05Rik,C87016,D130016K21Rik,D3Bwg1078e,KIAA0477,MGC176146,Usmg4,mKIAA0454	Mus musculus 12 days embryo spinal ganglion cDNA, RIKEN full-length enriched library, clone:D130062J22 product:similar to mRNA, similar to rat myomegalin, complete cds [Homo sapiens], full insert sequence.	83679	chr3	97550594	97672235				Mm.129840	TC1624789///TC1604634///TC1606193///TC1586117///TC1719696///TC1578814	ENSMUST00000090750///ENSMUST00000045243	67.4547	158.323	47.9125	98.0332	56.4184	221.608	114.521	138.841
AK142047	0.0382781	0.302658	3.16726	down	AK142047	Robo1	AW494633,AW742721,DUTT1,Gm310	Mus musculus 12 days embryo eyeball cDNA, RIKEN full-length enriched library, clone:D230012M05 product:roundabout homolog 1 (Drosophila), full insert sequence.	19876	chr16	72663393	72958489	GO:0006935(chemotaxis);GO:0007156(homophilic cell adhesion);GO:0007275(multicellular organismal development);GO:0007399(nervous system development);GO:0007411(axon guidance);GO:0030154(cell differentiation);GO:0050772(positive regulation of axonogenesis)	GO:0005615(extracellular space);GO:0009986(cell surface);GO:0016020(membrane);GO:0016021(integral to membrane);GO:0030673(axolemma)	GO:0004872(receptor activity);GO:0005515(protein binding);GO:0042802(identical protein binding);GO:0046982(protein heterodimerization activity)	Mm.310772	TC1596964///TC1602682		37.2493	122.015	34.4258	24.5131	52.8091	153.707	151.555	60.7825
AK142856	0.0057873	0.166833	2.8485	down	AK142856	Ikzf1	5832432G11Rik,Ikaros,KIAA4227,LyF-1,Zfpn1a1,Znfn1a1,hlk-1,mKIAA4227	Mus musculus 15 days embryo head cDNA, RIKEN full-length enriched library, clone:D930030M14 product:zinc finger protein, subfamily 1A, 1 (Ikaros), full insert sequence.	22778	chr11	11590179	11672929	GO:0006350(transcription);GO:0006355(regulation of transcription, DNA-dependent);GO:0016481(negative regulation of transcription);GO:0030097(hemopoiesis);GO:0030900(forebrain development);GO:0040018(positive regulation of body size);GO:0045941(positive regulation of transcription);GO:0045944(positive regulation of transcription from RNA polymerase II promoter)	GO:0005622(intracellular);GO:0005634(nucleus);GO:0005667(transcription factor complex);GO:0005721(centric heterochromatin)	GO:0003676(nucleic acid binding);GO:0003677(DNA binding);GO:0003700(transcription factor activity);GO:0005515(protein binding);GO:0008270(zinc ion binding);GO:0016564(transcriptional repressor activity);GO:0046872(metal ion binding)	Mm.103545	TC1650368	ENSMUST00000065433	571.095	1574.75	778.703	524.762	409.82	1714.57	1420.59	1589.1
AK144183	0.0210936	0.244101	2.74308	down	AK144183	Ccdc80	2610001E17Rik,Ssg1,Urb	Mus musculus RCB-0035 WEHI-3 cDNA, RIKEN full-length enriched library, clone:G430079O13 product:URB precursor, full insert sequence.	67896	chr16	45093788	45128037				Mm.181074	TC1575807	ENSMUST00000061050	82.855	238.444	67.9831	98.379	82.203	324.234	138.62	252.478
AK144197	0.00199751	0.121918	2.22979	down	AK144197	Ell2	-	Mus musculus submandibular gland CRL-1734 SCA-9 clone 15 cDNA, RIKEN full-length enriched library, clone:G430091K06 product:elongation factor RNA polymerase II 2, full insert sequence.	192657	chr13	75844931	75909806	GO:0006368(RNA elongation from RNA polymerase II promoter)	GO:0005575(cellular_component)	GO:0003746(translation elongation factor activity);GO:0008159(positive transcription elongation factor activity)	Mm.21288	TC1689546///TC1582167	ENSMUST00000001583	1206.82	2689.15	1056.05	1391.76	1172.65	2840.06	2291.96	2935.43
AK144241	0.00875856	0.191038	5.76933	down	AK144241	Aldh3a1	Ahd-4,Ahd4,Aldh,Aldh3	Mus musculus colon RCB-0549 Cle-H3 cDNA, RIKEN full-length enriched library, clone:G430146D23 product:aldehyde dehydrogenase family 3, subfamily A1, full insert sequence.	11670	chr11	61022243	61031916	GO:0006081(aldehyde metabolic process);GO:0006118(electron transport);GO:0008152(metabolic process)	GO:0005737(cytoplasm);GO:0005829(cytosol)	GO:0004028(3-chloroallyl aldehyde dehydrogenase activity);GO:0004029(aldehyde dehydrogenase (NAD) activity);GO:0004030(aldehyde dehydrogenase [NAD(P)+] activity);GO:0008106(alcohol dehydrogenase (NADP+) activity);GO:0016491(oxidoreductase activity)	Mm.4257	TC1580393	ENSMUST00000019246	48.0616	269.186	39.639	29.0032	75.5427	275.282	164.92	367.355
AK144367	0.0105343	0.200982	3.55889	down	AK144367	G630016G05Rik	-	Mus musculus 0 day neonate cortex cDNA, RIKEN full-length enriched library, clone:G630041N23 product:unclassifiable, full insert sequence.	654793	chr2	115892960	115911647							33.2262	120.79	30.8373	25.1326	43.7086	72.9477	141.691	147.73
AK144727	0.0398125	0.306548	2.55237	down	AK144727	Ccdc109a	2010012O16Rik,AV064928,C10orf42,D130073L02Rik,Gm64	Mus musculus lung RCB-0558 LLC cDNA, RIKEN full-length enriched library, clone:G730027H15 product:hypothetical protein, full insert sequence.	215999	chr10	58917693	59079440		GO:0016020(membrane);GO:0016021(integral to membrane)		Mm.296470///Mm.69732	TC1586614///TC1740634	ENSMUST00000009791	99.3765	236.059	51.9842	141.456	104.689	256.289	259.197	192.691
AK144959	0.00531058	0.163348	2.20497	down	AK144959	2700050L05Rik	AU022667,AW558805,MGC27934,MGC58090	Mus musculus mammary gland RCB-0526 Jyg-MC(A) cDNA, RIKEN full-length enriched library, clone:G830014P19 product:Hypothetical protein homolog (Fragment), full insert sequence.	214764	chr7	140829388	140846090	GO:0006350(transcription);GO:0006355(regulation of transcription, DNA-dependent)	GO:0005634(nucleus)		Mm.174044	TC1575120	ENSMUST00000043609	54.3861	119.886	64.5039	53.206	45.4485	96.8178	130.866	131.974
AK145451	0.00106198	0.102406	7.73628	down	AK145451	Nfil3	AV225605,E4BP4	Mus musculus 1 cell embryo 1 cell cDNA, RIKEN full-length enriched library, clone:I0C0047D12 product:nuclear factor, interleukin 3, regulated, full insert sequence.	18030	chr13	53062577	53068434	GO:0006355(regulation of transcription, DNA-dependent)	GO:0005575(cellular_component);GO:0005634(nucleus)	GO:0003674(molecular_function);GO:0003677(DNA binding);GO:0003700(transcription factor activity);GO:0046983(protein dimerization activity)	Mm.136604	TC1582388	ENSMUST00000071065	549.219	4506.13	521.895	534.283	591.48	3415.16	3274.41	6828.83
AK145733	0.030469	0.278265	2.53676	down	AK145733	Arglu1	9430010O03Rik,C130008N12	Mus musculus blastocyst blastocyst cDNA, RIKEN full-length enriched library, clone:I1C0035B17 product:hypothetical Glutamic acid-rich region profile/Arginine-rich region profile containing protein, full insert sequence.	234023	chr8	8681889	8690537				Mm.251655	TC1599259///TC1688722	ENSMUST00000048545	109.631	257.919	164.367	102.381	62.1457	249.586	245.135	279.036
AK145779	0.0230253	0.253024	2.00137	down	AK145779	Kif20b	B130024C23,C330014J10Rik,Mphosph1	Mus musculus blastocyst blastocyst cDNA, RIKEN full-length enriched library, clone:I1C0042L07 product:M-phase phosphoprotein 1, full insert sequence.	240641	chr19	35012742	35050221				Mm.278471	TC1639836///TC1745266///TC1617059	ENSMUST00000036256///ENSMUST00000087349	46.0332	94.0699	45.4132	38.9876	53.6988	125.454	86.6062	70.1495
AK146665	0.010467	0.200325	3.52931	down	AK146665	Hsd3b1	D3Ertd383e	Mus musculus 17 days pregnant adult female amnion cDNA, RIKEN full-length enriched library, clone:I920040E14 product:hydroxysteroid dehydrogenase-1, delta<5>-3-beta, full insert sequence.	15492	chr3	98656119	98663717	GO:0006694(steroid biosynthetic process);GO:0006700(C21-steroid hormone biosynthetic process)	GO:0005739(mitochondrion);GO:0005783(endoplasmic reticulum);GO:0016020(membrane);GO:0016021(integral to membrane)	GO:0003824(catalytic activity);GO:0003854(3-beta-hydroxy-delta5-steroid dehydrogenase activity);GO:0004769(steroid delta-isomerase activity);GO:0016491(oxidoreductase activity);GO:0016853(isomerase activity)	Mm.140811	TC1578530	ENSMUST00000029465	38.1728	140.937	44.8076	30.1667	39.544	81.2945	186.676	154.839
AK147575	0.0293489	0.275688	2.03844	down	AK147575	Gon4l	1500041I23Rik,2610100B20Rik,3632445O20Rik,5430404N14Rik,AA387005	Mus musculus cDNA, RIKEN full-length enriched library, clone:M5C1081D17 product:weakly similar to YY1 associated protein [Homo sapiens], full insert sequence.	76022	chr3	88639152	88714021	GO:0006355(regulation of transcription, DNA-dependent)	GO:0005634(nucleus)		Mm.126870	TC1601146///TC1589429///TC1642168	ENSMUST00000090942	283.01	573.119	380.162	232.304	236.562	515.904	463.626	739.827
AK147691	0.0187041	0.233867	2.11719	down	AK147691	1110012J17Rik	D130071O13,MGC77963,mKIAA0802,t8219b25	Mus musculus adult male brain UNDEFINED_CELL_LINE cDNA, RIKEN full-length enriched library, clone:M5C1108G17 product:hypothetical protein, full insert sequence.	68617	chr17	66686328	66799090				Mm.33421	TC1589196///TC1576550	ENSMUST00000036760	56.3396	120.446	43.9125	58.6479	66.4584	104.941	97.2724	159.124
AK149094	0.030179	0.278007	2.72638	down	AK149094	Usp34	A530081C03Rik,Murr2	Mus musculus 2 days neonate sympathetic ganglion cDNA, RIKEN full-length enriched library, clone:7120482O14 product:Ubiquitin-specific proteinase 34 homolog [Homo sapiens], full insert sequence.	17847	chr11	23206894	23261716	GO:0006511(ubiquitin-dependent protein catabolic process);GO:0006512(ubiquitin cycle)	GO:0005622(intracellular)	GO:0004221(ubiquitin thiolesterase activity);GO:0005097(Rab GTPase activator activity);GO:0008233(peptidase activity);GO:0008234(cysteine-type peptidase activity);GO:0016787(hydrolase activity)	Mm.119155	TC1636357///TC1597778///TC1634653	ENSMUST00000101465	66.2032	177.935	72.7431	86.295	39.5716	244.83	162.234	126.74
AK155717	0.00424538	0.150502	2.02871	down	AK155717	Itgam	CD11b/CD18,CR3,CR3A,Cd11b,F730045J24Rik,Ly-40,MAC1,Mac-1,Mac-1a	Mus musculus B6-derived CD11 +ve dendritic cells cDNA, RIKEN full-length enriched library, clone:F730209H22 product:integrin alpha M, full insert sequence.	16409	chr7	135206153	135271674	GO:0006412(translation);GO:0007155(cell adhesion);GO:0007229(integrin-mediated signaling pathway);GO:0030593(neutrophil chemotaxis);GO:0045123(cellular extravasation);GO:0050798(activated T cell proliferation)	GO:0005622(intracellular);GO:0005634(nucleus);GO:0005840(ribosome);GO:0008305(integrin complex);GO:0009897(external side of plasma membrane);GO:0016020(membrane);GO:0016021(integral to membrane)	GO:0001846(opsonin binding);GO:0001948(glycoprotein binding);GO:0003735(structural constituent of ribosome);GO:0004872(receptor activity);GO:0005509(calcium ion binding);GO:0005515(protein binding)	Mm.262106	TC1590713	ENSMUST00000064821	57.9873	118.541	51.7894	63.7805	58.392	109.021	102.531	144.071
AK157542	0.00077687	0.098334	2.57927	down	AK157542	Ankrd13c	AI505652,AU022220	Mus musculus activated spleen cDNA, RIKEN full-length enriched library, clone:F830222A02 product:hypothetical Ankyrin containing protein, full insert sequence.	433667	chr3	157610429	157669801				Mm.265806///Mm.406382	TC1651722///TC1578842	ENSMUST00000040787	65.8383	169.3	71.0425	71.1133	55.3591	165.947	188.706	153.249
AK158785	0.000340004	0.089091	2.79279	down	AK158785	Tle3	2610103N05Rik,ESG,Grg3a,Grg3b,mKIAA1547	Mus musculus visual cortex cDNA, RIKEN full-length enriched library, clone:K430310B18 product:transducin-like enhancer of split 3, homolog of Drosophila E(spl), full insert sequence.	21887	chr9	61221341	61266304	GO:0006350(transcription);GO:0006355(regulation of transcription, DNA-dependent);GO:0007275(multicellular organismal development);GO:0007283(spermatogenesis);GO:0016055(Wnt receptor signaling pathway);GO:0030154(cell differentiation);GO:0045449(regulation of transcription)	GO:0005634(nucleus)		Mm.24255	TC1578063///TC1587872	ENSMUST00000034820	2582.06	7185.42	2210.23	2852.16	2683.81	6550.47	7683.92	7321.85
AK159389	0.000290646	0.089091	4.77986	down	AK159389	Fkbp5	51kDa,D17Ertd592e,Dit1,FKBP51	Mus musculus osteoclast-like cell cDNA, RIKEN full-length enriched library, clone:I420019D10 product:FK506 binding protein 5, full insert sequence.	14229	chr17	28536041	28654469	GO:0006457(protein folding)	GO:0005634(nucleus)	GO:0003755(peptidyl-prolyl cis-trans isomerase activity);GO:0005488(binding);GO:0005515(protein binding);GO:0016853(isomerase activity)	Mm.276405	TC1644747///TC1572635	ENSMUST00000079413///ENSMUST00000062167	2003.56	9524.75	2430.12	1884.39	1696.16	8931.17	11041.9	8601.2
AK159662	0.0409687	0.310306	3.09741	down	AK159662	Srpx	drs,drs-1,drs-2,mDRS-1,mDRS-2	Mus musculus osteoclast-like cell cDNA, RIKEN full-length enriched library, clone:I420027J17 product:sushi-repeat-containing protein, full insert sequence.	51795	chrX	9615102	9694787	GO:0008150(biological_process)	GO:0005615(extracellular space)	GO:0003674(molecular_function)	Mm.1927	TC1770091	ENSMUST00000044789	168.193	512.404	179.27	236.816	88.4912	364.69	780.119	392.402
AK160627	0.0163983	0.226544	2.64789	down	AK160627	Ddx26b	4930535D10Rik,6330505F04Rik,D130066O12	Mus musculus 11 days embryo whole body cDNA, RIKEN full-length enriched library, clone:2700071F03 product:Hypothetical von Willebrand factor type A domain containing protein homolog [Mus musculus], full insert sequence.	236790	chrX	53708053	53748897				Mm.434800///Mm.72753	TC1585721///NP921855///TC1666499	ENSMUST00000039374	133.345	346.41	160.977	153.331	85.7286	432.328	338.314	268.588
AK161184	0.00932542	0.194305	3.39187	down	AK161184	BC048546	MGC58520	Mus musculus 0 day neonate head cDNA, RIKEN full-length enriched library, clone:4832408N09 product:weakly similar to Ovomacroglobulin (Fragments) [Gallus gallus], full insert sequence.	232400	chr6	128489841	128531624			GO:0004866(endopeptidase inhibitor activity)	Mm.259234	TC1627116	ENSMUST00000060574	41.5214	139.549	47.0045	50.7499	26.8097	188.492	116.768	113.388
AK161189	0.0294894	0.276163	2.00785	down	AK161189	Acsl1	Acas,Acas1,Acs,FACS,Facl2	Mus musculus 0 day neonate head cDNA, RIKEN full-length enriched library, clone:4832421C24 product:acyl-CoA synthetase long-chain family member 1, full insert sequence.	14081	chr8	47576487	47621404	GO:0006629(lipid metabolic process);GO:0006631(fatty acid metabolic process);GO:0008152(metabolic process)	GO:0005739(mitochondrion);GO:0005777(peroxisome);GO:0016020(membrane);GO:0016021(integral to membrane)	GO:0000287(magnesium ion binding);GO:0003824(catalytic activity);GO:0004467(long-chain-fatty-acid-CoA ligase activity);GO:0016874(ligase activity)	Mm.210323	TC1576448///TC1575271	ENSMUST00000034046	842.143	1637.27	1047.5	930.385	548.54	1855.31	1584.02	1472.47
AK161216	0.00775625	0.182932	2.00149	down	AK161216	Car6	DOC1	Mus musculus 0 day neonate head cDNA, RIKEN full-length enriched library, clone:4833416H22 product:carbonic anhydrase 6, full insert sequence.	12353	chr4	149561124	149575244	GO:0006730(one-carbon compound metabolic process)	GO:0005615(extracellular space)	GO:0004089(carbonate dehydratase activity);GO:0008270(zinc ion binding);GO:0016829(lyase activity);GO:0046872(metal ion binding)	Mm.232523	TC1573909	ENSMUST00000030817	274.073	553.537	289.706	295.89	236.623	595.909	634.734	429.968
AK161272	0.0186518	0.233548	2.44905	down	AK161272	Penk	AI326464,ENK,PPA,Penk1	Mus musculus adult male testis cDNA, RIKEN full-length enriched library, clone:4922504O09 product:preproenkephalin 1, full insert sequence.	18619	chr4	4060682	4065962	GO:0001662(behavioral fear response);GO:0007218(neuropeptide signaling pathway);GO:0007610(behavior);GO:0019233(sensory perception of pain)		GO:0001515(opioid peptide activity)	Mm.2899	TC1623309///TC1579360	ENSMUST00000070375	994.849	2321.56	1391.59	631.705	961.253	2502.61	2364.34	2097.75
AK161416	0.0146777	0.21884	2.06432	down	AK161416	Rbms1	2600014B10Rik,AI255215,MSSP-1,MSSP-2,MSSP-3,YC1	Mus musculus adult male testis cDNA, RIKEN full-length enriched library, clone:4930564K11 product:RNA binding motif, single stranded interacting protein 1, full insert sequence.	56878	chr2	60590786	60618998	GO:0006260(DNA replication)	GO:0005634(nucleus)	GO:0000166(nucleotide binding);GO:0003676(nucleic acid binding);GO:0003677(DNA binding);GO:0003690(double-stranded DNA binding);GO:0003697(single-stranded DNA binding);GO:0003723(RNA binding)	Mm.259667	TC1578604///TC1650776	ENSMUST00000028347///ENSMUST00000074547	365.819	748.53	316.192	474.283	306.982	684.5	647.843	913.248
AK161457	0.0416861	0.311432	2.04029	down	AK161457	Naalad2	2700022G20Rik,D9Ertd285e,GCPIII,MGC124348,MGC124349,NAADALASE2,NAALADASE2	Mus musculus adult male testis cDNA, RIKEN full-length enriched library, clone:4932410E13 product:N-acetylated alpha-linked acidic dipeptidase 2, full insert sequence.	72560	chr9	18127464	18201982	GO:0006508(proteolysis);GO:0042135(neurotransmitter catabolic process)	GO:0016020(membrane);GO:0016021(integral to membrane)	GO:0003824(catalytic activity);GO:0004180(carboxypeptidase activity);GO:0008233(peptidase activity);GO:0008237(metallopeptidase activity);GO:0008270(zinc ion binding);GO:0009980(glutamate carboxypeptidase activity);GO:0016787(hydrolase activity);GO:0016805(dipeptidase activity);GO:0017165(dipeptidase E activity);GO:0043275(glutamate carboxypeptidase II activity);GO:0046872(metal ion binding)	Mm.7060	TC1581289	ENSMUST00000001826	44.8409	95.9284	47.2311	39.9107	47.381	107.835	57.4023	122.548
AK161852	8.71167e-05	0.0713968	2.17982	down	AK161852	Mat2a	D630045P18Rik,MGC6545	Mus musculus adult male medulla oblongata cDNA, RIKEN full-length enriched library, clone:6330416K16 product:methionine adenosyltransferase II, alpha, full insert sequence.	232087	chr6	72382792	72389552	GO:0006556(S-adenosylmethionine biosynthetic process);GO:0006730(one-carbon compound metabolic process)		GO:0000166(nucleotide binding);GO:0000287(magnesium ion binding);GO:0004478(methionine adenosyltransferase activity);GO:0005524(ATP binding);GO:0016740(transferase activity);GO:0030955(potassium ion binding);GO:0046872(metal ion binding)	Mm.29815	TC1583501	ENSMUST00000059472	8635.35	18839.1	8260.65	9081.23	8564.16	17713.5	20278.6	18525.3
AK162858	0.0147823	0.218873	2.86976	down	AK162858	Mbd1	Cxxc3,PCM1	Mus musculus adult male hypothalamus cDNA, RIKEN full-length enriched library, clone:A230058I09 product:methyl-CpG binding domain protein 1, full insert sequence.	17190	chr18	74427957	74434532	GO:0006306(DNA methylation);GO:0006350(transcription);GO:0006355(regulation of transcription, DNA-dependent)	GO:0000785(chromatin);GO:0000792(heterochromatin);GO:0005634(nucleus)	GO:0003677(DNA binding);GO:0008270(zinc ion binding);GO:0046872(metal ion binding)	Mm.22522	TC1699912///TC1727829///TC1588047	ENSMUST00000025446	306.979	851.169	295.905	428.726	196.304	722.312	762.379	1068.82
AK163494	0.0211023	0.244101	2.06327	down	AK163494	Fut8	-	Mus musculus adult male corpora quadrigemina cDNA, RIKEN full-length enriched library, clone:B230309F15 product:fucosyltransferase 8, full insert sequence.	53618	chr12	78340007	78514680	GO:0007179(transforming growth factor beta receptor signaling pathway);GO:0007229(integrin-mediated signaling pathway);GO:0007585(respiratory gaseous exchange);GO:0016477(cell migration);GO:0043112(receptor metabolic process)	GO:0005615(extracellular space);GO:0016020(membrane);GO:0016021(integral to membrane)	GO:0008424(glycoprotein 6-alpha-L-fucosyltransferase activity);GO:0016740(transferase activity);GO:0016757(transferase activity, transferring glycosyl groups);GO:0046921(alpha(1,6)-fucosyltransferase activity)	Mm.35628	TC1572721	ENSMUST00000021463	95.847	190.75	80.8336	134.469	72.2387	184.152	208.312	179.787
AK163536	0.000383888	0.089091	2.39582	down	AK163536	Kif21a	AI850764,mKIAA1708	Mus musculus adult male corpora quadrigemina cDNA, RIKEN full-length enriched library, clone:B230353J09 product:kinesin family member 21A, full insert sequence.	16564	chr15	90803055	90880242	GO:0007017(microtubule-based process);GO:0007018(microtubule-based movement)	GO:0005871(kinesin complex);GO:0005874(microtubule);GO:0005875(microtubule associated complex)	GO:0000166(nucleotide binding);GO:0003774(motor activity);GO:0003777(microtubule motor activity);GO:0005524(ATP binding)	Mm.41379	TC1616395///TC1594849	ENSMUST00000088614	336.011	807.21	365.172	320.252	322.609	757.95	745.623	918.058
AK163550	0.0160152	0.225614	2.39713	down	AK163550	Vgll4	BC048841,MGC54805,VGL-4	Mus musculus adult male corpora quadrigemina cDNA, RIKEN full-length enriched library, clone:B230366A08 product:hypothetical protein, full insert sequence.	232334	chr6	114812107	114919221	GO:0006350(transcription);GO:0006355(regulation of transcription, DNA-dependent)	GO:0005634(nucleus)		Mm.268357	TC1581356	ENSMUST00000032459	102.007	235.964	144.198	88.8805	72.9439	207.943	226.318	273.632
AK164641	0.0113663	0.205698	2.8186	down	AK164641	Srp72	5730576P14Rik,72kDa,AI132477,BC019196,C77589	Mus musculus 13 days embryo stomach cDNA, RIKEN full-length enriched library, clone:D530009O16 product:similar to CaM kinase II isoform [Homo sapiens], full insert sequence.	66661	chr5	77413119	77424171	GO:0006614(SRP-dependent cotranslational protein targeting to membrane)	GO:0005786(signal recognition particle, endoplasmic reticulum targeting);GO:0030529(ribonucleoprotein complex)	GO:0003674(molecular_function);GO:0005488(binding)	Mm.296976	TC1713947///TC1598516	ENSMUST00000101087///ENSMUST00000048168	46.4148	130.112	58.0983	32.2062	48.94	166.994	125.509	97.8345
AK165010	0.0278919	0.271461	2.004	down	AK165010	Espn	je	Mus musculus 0 day neonate eyeball cDNA, RIKEN full-length enriched library, clone:E130202O15 product:espin, full insert sequence.	56226	chr4	151494984	151506446	GO:0007626(locomotory behavior);GO:0030046(parallel actin filament bundle formation);GO:0051017(actin filament bundle formation);GO:0051494(negative regulation of cytoskeleton organization and biogenesis)	GO:0005737(cytoplasm);GO:0005902(microvillus);GO:0005903(brush border);GO:0015629(actin cytoskeleton)	GO:0017124(SH3 domain binding);GO:0051015(actin filament binding)	Mm.264215	NP648079///TC1584345	ENSMUST00000049305///ENSMUST00000103196	165.347	325.949	218.534	156.704	120.801	397.009	312.373	268.466
AK165722	0.00583203	0.166955	3.26667	down	AK165722	Fam107a	MGC58343	Mus musculus 16 days neonate male diencephalon cDNA, RIKEN full-length enriched library, clone:G630025L12 product:unclassifiable, full insert sequence.	268709	chr14	9128791	9142290				Mm.256058	NP718202	ENSMUST00000036070	52.4288	178.106	44.7157	57.5944	54.9764	257.342	138.506	138.469
AK167264	0.00992463	0.197466	2.19802	down	AK167264	Nin	3110068G20Rik,AI385615,AU024711,MGC169413,mKIAA1565	Mus musculus blastocyst blastocyst cDNA, RIKEN full-length enriched library, clone:I1C0047M21 product:ninein, full insert sequence.	18080	chr12	71119726	71212912		GO:0005813(centrosome);GO:0005874(microtubule)	GO:0000166(nucleotide binding);GO:0005509(calcium ion binding);GO:0005515(protein binding);GO:0005525(GTP binding)	Mm.244047	TC1581229///TC1619898///TC1674241	ENSMUST00000095666	40.1399	86.5452	41.8368	49.4949	29.088	94.8418	89.1122	75.6817
AK168345	0.036734	0.297775	2.42254	down	AK168345	Kbtbd3	2200003A07Rik,Bklhd3	Mus musculus TIB-55 BB88 cDNA, RIKEN full-length enriched library, clone:I730095A04 product:kelch repeat and BTB (POZ) domain containing 3, full insert sequence.	69149	chr9	4309834	4331711			GO:0005515(protein binding)	Mm.25946	TC1583684///TC1619868	ENSMUST00000049648	40.1421	95.2066	31.4625	59.3064	29.6574	109.324	112.095	64.2004
AK168476	0.00620261	0.169965	2.93327	down	AK168476	Rsrc2	1500011J06Rik	Mus musculus 17 days embryo kidney cDNA, RIKEN full-length enriched library, clone:I920026C10 product:hypothetical protein, full insert sequence.	208606	chr5	124191957	124199421				Mm.276341	TC1644390	ENSMUST00000057795	71.3559	205.695	70.639	92.5518	50.877	251.008	175.349	190.728
AK168886	0.0390988	0.30466	2.53963	down	AK168886	Psmd8	6720456J22Rik,AA407360,AL033291,AL033322,AL033323,C76433	Mus musculus 16 days embryo kidney cDNA, RIKEN full-length enriched library, clone:I920062I18 product:proteasome (prosome, macropain) 26S subunit, non-ATPase, 8, full insert sequence.	57296	chr7	29959206	29965692	GO:0006508(proteolysis)	GO:0005829(cytosol);GO:0005838(proteasome regulatory particle (sensu Eukaryota));GO:0043234(protein complex)		Mm.273152	TC1573318	ENSMUST00000059642	42.3785	99.172	48.52	57.3032	21.3123	104.578	101.484	91.4542
AK168891	0.00281497	0.13031	2.64513	down	AK168891	Ccng2	MGC113793	Mus musculus 17 days embryo stomach cDNA, RIKEN full-length enriched library, clone:I920062L09 product:cyclin G2, full insert sequence.	12452	chr5	93697580	93705250	GO:0000074(regulation of progression through cell cycle);GO:0007049(cell cycle);GO:0007067(mitosis);GO:0051301(cell division)		GO:0016538(cyclin-dependent protein kinase regulator activity)	Mm.3527	TC1598629		1214.83	3179.75	1073.97	1536.61	1033.92	3409.83	3427.36	2702.06
AK170116	0.0149293	0.218873	2.02007	down	AK170116	Cish	AI385595,CIS1,Cis,F17,F23	Mus musculus NOD-derived CD11c +ve dendritic cells cDNA, RIKEN full-length enriched library, clone:F630019C17 product:cytokine inducible SH2-containing protein, full insert sequence.	12700	chr9	107199019	107204292	GO:0001558(regulation of cell growth);GO:0007205(protein kinase C activation);GO:0007242(intracellular signaling cascade);GO:0009968(negative regulation of signal transduction)	GO:0005886(plasma membrane)	GO:0005515(protein binding)	Mm.4592	TC1575404	ENSMUST00000098412	558.468	1158.5	551.235	588.208	535.962	810.375	1243.14	1421.98
AK171642	0.0114856	0.206125	2.0256	down	AK171642	Xdh	XO,Xor,Xox-1,Xox1	Mus musculus activated spleen cDNA, RIKEN full-length enriched library, clone:F830002A19 product:xanthine dehydrogenase, full insert sequence.	22436	chr17	74246346	74258698	GO:0006118(electron transport);GO:0007595(lactation);GO:0030856(regulation of epithelial cell differentiation)	GO:0005777(peroxisome)	GO:0004854(xanthine dehydrogenase activity);GO:0004855(xanthine oxidase activity);GO:0005506(iron ion binding);GO:0009055(electron carrier activity);GO:0016491(oxidoreductase activity);GO:0030151(molybdenum ion binding);GO:0046872(metal ion binding);GO:0050660(FAD binding)	Mm.11223	TC1581763	ENSMUST00000024866	253.702	504.422	298.482	184.277	278.347	484.045	558.718	470.502
AK172167	0.0277566	0.271164	2.02702	down	AK172167	Ankrd9	2500003O20Rik	Mus musculus activated spleen cDNA, RIKEN full-length enriched library, clone:F830101E05 product:ankyrin repeat domain 9, full insert sequence.	74251	chr12	112213562	112217231			GO:0016787(hydrolase activity)	Mm.250989	TC1613783///TC1581510	ENSMUST00000043459	250.327	490.489	324.756	261.047	165.177	520.956	519.927	430.584
AK172547	0.0157423	0.22371	2.0357	down	AK172547	1700106N22Rik	AI480743,AV099781	Mus musculus activated spleen cDNA, RIKEN full-length enriched library, clone:F830213E06 product:unclassifiable, full insert sequence.	73582	chr17	85491422	85565848				Mm.260753			77.521	162.06	69.625	79.3192	83.6188	220.1	133.136	132.945
AK179730	0.0414045	0.311013	3.23432	down	AK179730	Itgb3bp	4930471O16Rik,AU022583	Mus musculus cDNA, clone:Y0G0111I03, strand:plus, reference:ENSEMBL:Mouse-Transcript-ENST:ENSMUST00000030277, based on BLAT search.	67733	chr4	99432092	99495809	GO:0006350(transcription);GO:0006355(regulation of transcription, DNA-dependent);GO:0006915(apoptosis)	GO:0000775(chromosome, pericentric region);GO:0005634(nucleus);GO:0005694(chromosome)		Mm.257094	TC1600598///TC1582290///TC1665963	ENSMUST00000102786	41.5697	114.076	20.2674	28.4978	75.9438	112.482	116.347	113.4
AK217058	0.000142619	0.0713968	2.75249	down	AK217058	N/A	N/A	Mus musculus cDNA, clone:Y2G0140H20, strand:plus, reference:ENSEMBL:Mouse-Transcript-ENST:ENSMUST00000050567, based on BLAT search.	N/A	chr1	52981746	52982161							551.101	1509.17	525.75	497.772	629.782	1521.53	1493.73	1512.25
AK217863	0.018553	0.233082	2.14373	down	AK217863	N/A	N/A	Mus musculus cDNA, clone:Y2G0143E12, strand:unspecified.	N/A	chr11	120230880	120231112							175.707	370.534	177.842	223.989	125.289	451.261	322.771	337.571
AK220235	0.00220357	0.125352	2.18399	down	AK220235	Ikzf1	5832432G11Rik,Ikaros,KIAA4227,LyF-1,Zfpn1a1,Znfn1a1,hlk-1,mKIAA4227	Mus musculus mRNA for mKIAA4227 protein.	22778	chr11	11590179	11672929	GO:0006350(transcription);GO:0006355(regulation of transcription, DNA-dependent);GO:0016481(negative regulation of transcription);GO:0030097(hemopoiesis);GO:0030900(forebrain development);GO:0040018(positive regulation of body size);GO:0045941(positive regulation of transcription);GO:0045944(positive regulation of transcription from RNA polymerase II promoter)	GO:0005622(intracellular);GO:0005634(nucleus);GO:0005667(transcription factor complex);GO:0005721(centric heterochromatin)	GO:0003676(nucleic acid binding);GO:0003677(DNA binding);GO:0003700(transcription factor activity);GO:0005515(protein binding);GO:0008270(zinc ion binding);GO:0016564(transcriptional repressor activity);GO:0046872(metal ion binding)	Mm.103545	TC1650368	ENSMUST00000065433	747.843	1627.04	864.29	746.845	632.395	1776.99	1426.02	1678.11
AY034611	0.00533632	0.163348	2.61829	down	AY034611	Trp53inp1	2700057G22Rik,SIP,SIP18,SIP27,Stinp,Teap	alt '2700057G22Rik#SIP#SIP18#SIP27#Stinp#Teap'	60599	chr4	11083587	11101524	GO:0006915(apoptosis);GO:0006917(induction of apoptosis);GO:0006950(response to stress)	GO:0005634(nucleus);GO:0005730(nucleolus)		Mm.393018	TC1686880///TC1660258	ENSMUST00000029865	298.122	782.765	234.054	347.901	312.412	950.303	608.991	789.001
AY388962	0.0349599	0.292648	2.04682	down	AY388962	Pde4d	9630011N22Rik,Dpde3	Mus musculus cAMP-specific phosphodiesterase PDE4D9 (Pde4d) mRNA, complete cds.	238871	chr13	110476367	110741682	GO:0006198(cAMP catabolic process);GO:0006939(smooth muscle contraction);GO:0007165(signal transduction)		GO:0003824(catalytic activity);GO:0004114(3',5'-cyclic-nucleotide phosphodiesterase activity);GO:0016787(hydrolase activity);GO:0046872(metal ion binding)	Mm.434429	TC1594887///NP049127///TC1585860///TC1593636	ENSMUST00000079975	509.878	1024.66	340.514	637.007	552.112	781.913	1148.59	1143.46
AY690602	0.00105934	0.102406	5.20846	down	AY690602	Arntl	Arnt3,BMAL1b,Bmal1,MOP3,bHLHe5,bmal1b	alt 'Arnt3#BMAL1b#Bmal1#MOP3#bHLHe5#bmal1b''	11865	chr7	120424163	120439107	GO:0000060(protein import into nucleus, translocation);GO:0000160(two-component signal transduction system (phosphorelay));GO:0006350(transcription);GO:0006355(regulation of transcription, DNA-dependent);GO:0007165(signal transduction);GO:0007623(circadian rhythm);GO:0042176(regulation of protein catabolic process);GO:0045449(regulation of transcription)	GO:0005634(nucleus)	GO:0000155(two-component sensor activity);GO:0003677(DNA binding);GO:0003700(transcription factor activity);GO:0004871(signal transducer activity);GO:0004872(receptor activity);GO:0005515(protein binding);GO:0030528(transcription regulator activity)	Mm.440371	TC1577063	ENSMUST00000084703	90.9209	480.801	110.932	82.7171	79.1131	357.579	628.194	456.63
AY707858	0.00895829	0.191332	4.12604	down	AY707858	N/A	N/A	Mus musculus KISS1 isoform d (Kiss1) mRNA, complete cds, alternatively spliced.	N/A	chr1	135206399	135226299							53.8945	210.944	77.506	53.431	30.7464	160.629	244.09	228.112
AY738716	0.0427612	0.314914	3.22966	down	AY738716	Crem	ICER	alt 'ICER'	12916	chr18	3266353	3327517	GO:0006350(transcription);GO:0006355(regulation of transcription, DNA-dependent);GO:0007283(spermatogenesis)	GO:0005634(nucleus);GO:0005667(transcription factor complex)	GO:0003677(DNA binding);GO:0003700(transcription factor activity);GO:0005515(protein binding);GO:0046983(protein dimerization activity)	Mm.5244	TC1641765///TC1709879///TC1593768///TC1624922///NP059702	ENSMUST00000073545///ENSMUST00000025070	75.3004	251.305	74.9783	107.135	43.7877	413.321	188.528	152.065
AY738718	0.000484258	0.089091	2.44696	down	AY738718	Crem	ICER	alt 'ICER'	12916	chr18	3266353	3327517	GO:0006350(transcription);GO:0006355(regulation of transcription, DNA-dependent);GO:0007283(spermatogenesis)	GO:0005634(nucleus);GO:0005667(transcription factor complex)	GO:0003677(DNA binding);GO:0003700(transcription factor activity);GO:0005515(protein binding);GO:0046983(protein dimerization activity)	Mm.5244	TC1641765///TC1709879///TC1593768///TC1624922///NP059702	ENSMUST00000073545///ENSMUST00000025070	135.468	333.353	141.961	136.203	128.24	286.194	378.435	335.431
AY738720	0.0104733	0.200325	3.04338	down	AY738720	Crem	ICER	alt 'ICER'	12916	chr18	3266353	3327517	GO:0006350(transcription);GO:0006355(regulation of transcription, DNA-dependent);GO:0007283(spermatogenesis)	GO:0005634(nucleus);GO:0005667(transcription factor complex)	GO:0003677(DNA binding);GO:0003700(transcription factor activity);GO:0005515(protein binding);GO:0046983(protein dimerization activity)	Mm.5244	TC1641765///TC1709879///TC1593768///TC1624922///NP059702	ENSMUST00000073545///ENSMUST00000025070	32.1486	96.1052	32.9598	21.3742	42.1119	102.064	115.008	71.244
BC002043	0.000115994	0.0713968	4.2528	down	BC002043	Cdkn1a	CAP20,CDKI,CIP1,Cdkn1,P21,SDI1,Waf1,mda6,p21Cip1,p21WAF	Mus musculus cyclin-dependent kinase inhibitor 1A (P21), mRNA (cDNA clone MGC:6025 IMAGE:3495942), complete cds.	12575	chr17	29230763	29236509	GO:0000074(regulation of progression through cell cycle);GO:0006974(response to DNA damage stimulus);GO:0007049(cell cycle);GO:0007050(cell cycle arrest);GO:0008285(negative regulation of cell proliferation);GO:0009411(response to UV);GO:0030890(positive regulation of B cell proliferation);GO:0043066(negative regulation of apoptosis);GO:0043071(positive regulation of non-apoptotic programmed cell…	GO:0000307(cyclin-dependent protein kinase holoenzyme complex);GO:0005634(nucleus);GO:0005829(cytosol)	GO:0004860(protein kinase inhibitor activity);GO:0004861(cyclin-dependent protein kinase inhibitor activity);GO:0005515(protein binding);GO:0008270(zinc ion binding);GO:0016301(kinase activity);GO:0030332(cyclin binding);GO:0046872(metal ion binding)	Mm.195663	TC1572105	ENSMUST00000023829	232.495	990.011	261.682	224.681	211.12	1136.81	898.954	934.268
BC002236	0.0465744	0.323748	2.32028	down	BC002236	Ublcp1	4930527B16Rik,8430435I17Rik,BC002236,MGC117826,MGC7513	Mus musculus ubiquitin-like domain containing CTD phosphatase 1, mRNA (cDNA clone IMAGE:3491659), complete cds.	79560	chr11	44268076	44274332	GO:0006464(protein modification process)	GO:0005634(nucleus)	GO:0004721(phosphoprotein phosphatase activity);GO:0016787(hydrolase activity)	Mm.338784	TC1596709	ENSMUST00000102795	211.459	456.115	237.927	285.74	110.711	484.3	477.326	406.72
BC003451	0.000495734	0.089091	2.0868	down	BC003451	Mat2a	D630045P18Rik,MGC6545	Mus musculus methionine adenosyltransferase II, alpha, mRNA (cDNA clone MGC:6545 IMAGE:2655444), complete cds.	232087	chr6	72383688	72389492	GO:0006556(S-adenosylmethionine biosynthetic process);GO:0006730(one-carbon compound metabolic process)		GO:0000166(nucleotide binding);GO:0000287(magnesium ion binding);GO:0004478(methionine adenosyltransferase activity);GO:0005524(ATP binding);GO:0016740(transferase activity);GO:0030955(potassium ion binding);GO:0046872(metal ion binding)	Mm.29815	TC1583501	ENSMUST00000059472	9106.61	18953.9	10053.6	8110.71	9155.54	18218.5	18352.2	20291.1
BC003463	0.000261541	0.089091	2.12068	down	BC003463	Eif1	MGC101938,MGC6503,Sui1-rs1	Mus musculus eukaryotic translation initiation factor 1, mRNA (cDNA clone MGC:6503 IMAGE:2648657), complete cds.	20918	chr11	100181309	100183410	GO:0006412(translation);GO:0006413(translational initiation)		GO:0003743(translation initiation factor activity)	Mm.13886	TC1686393///TC1602687	ENSMUST00000049385	3856.49	8163.1	4163.88	3932.14	3473.45	7916.85	7898.26	8674.19
BC003747	0.0361943	0.296865	3.43305	down	BC003747	Tnnt3	fTnT	Mus musculus troponin T3, skeletal, fast, mRNA (cDNA clone MGC:5854 IMAGE:3594256), complete cds.	21957	chr7	149684747	149701908	GO:0006937(regulation of muscle contraction)	GO:0005861(troponin complex)	GO:0005200(structural constituent of cytoskeleton);GO:0005515(protein binding)	Mm.389992	NP050672///NP433579	ENSMUST00000074187	45.7728	172.774	36.7785	40.4691	60.0709	246.705	74.325	197.291
BC003783	0.000616277	0.0939301	2.21384	down	BC003783	Cish	AI385595,CIS1,Cis,F17,F23	Mus musculus cytokine inducible SH2-containing protein, mRNA (cDNA clone MGC:6010 IMAGE:3487580), complete cds.	12700	chr9	107199227	107204293	GO:0001558(regulation of cell growth);GO:0007205(protein kinase C activation);GO:0007242(intracellular signaling cascade);GO:0009968(negative regulation of signal transduction)	GO:0005886(plasma membrane)	GO:0005515(protein binding)	Mm.4592	TC1575404	ENSMUST00000098412	624.893	1375.71	625.418	708.668	540.594	1322.29	1375.52	1429.32
BC004598	0.0168602	0.227609	2.20332	down	BC004598	Sh3bp1	3BP-1	Mus musculus SH3-domain binding protein 1, mRNA (cDNA clone MGC:6037 IMAGE:3584958), complete cds.	20401	chr15	78731828	78742475	GO:0007165(signal transduction)	GO:0005622(intracellular);GO:0005737(cytoplasm)	GO:0005096(GTPase activator activity);GO:0005515(protein binding)	Mm.4462	TC1699239	ENSMUST00000061239	68.8875	147.209	88.1198	72.2334	46.3093	164.223	132.445	144.958
BC004770	0.000613382	0.0939301	8.66492	down	BC004770	Nr4a1	GFRP1,Gfrp,Hbr-1,Hbr1,Hmr,N10,NGFI-B,NGFIB,NP10,TIS1,TR3,nur77	Mus musculus nuclear receptor subfamily 4, group A, member 1, mRNA (cDNA clone MGC:7048 IMAGE:3156434), complete cds.	15370	chr15	101097296	101105225	GO:0006350(transcription);GO:0006355(regulation of transcription, DNA-dependent);GO:0006917(induction of apoptosis);GO:0043154(negative regulation of caspase activity);GO:0045449(regulation of transcription);GO:0045944(positive regulation of transcription from RNA polymerase II promoter)	GO:0005634(nucleus)	GO:0003677(DNA binding);GO:0003700(transcription factor activity);GO:0003707(steroid hormone receptor activity);GO:0004872(receptor activity);GO:0004879(ligand-dependent nuclear receptor activity);GO:0005515(protein binding);GO:0008270(zinc ion binding);GO:0030528(transcription regulator activity);GO:0046872(metal ion binding)	Mm.119	TC1779970	ENSMUST00000023779	158.517	1406.55	178.056	124.423	173.073	1259.82	1021.51	1938.32
BC005413	0.000750496	0.098334	2.02699	down	BC005413	Sult1a1	AI266890,PST,Stp,Stp1	Mus musculus sulfotransferase family 1A, phenol-preferring, member 1, mRNA (cDNA clone MGC:5691 IMAGE:3488459), complete cds.	20887	chr7	133816383	133819871	GO:0006629(lipid metabolic process);GO:0008202(steroid metabolic process)		GO:0000166(nucleotide binding);GO:0004062(aryl sulfotransferase activity);GO:0008146(sulfotransferase activity);GO:0016740(transferase activity);GO:0017067(tyrosine-ester sulfotransferase activity)	Mm.368982	TC1582276		404.954	823.776	416.934	420.142	377.787	767.667	764.291	939.37
BC005421	0.000265978	0.089091	3.11547	down	BC005421	Tbc1d8	AD3,HBLP1,VRP	Mus musculus TBC1 domain family, member 8, mRNA (cDNA clone MGC:5724 IMAGE:3594100), complete cds.	54610	chr1	39428706	39462214	GO:0006457(protein folding);GO:0008150(biological_process)	GO:0005575(cellular_component);GO:0005622(intracellular);GO:0016021(integral to membrane)	GO:0003674(molecular_function);GO:0005096(GTPase activator activity);GO:0005097(Rab GTPase activator activity)	Mm.387293	TC1576889	ENSMUST00000054462	991.926	3077.56	1042.65	1093.02	840.108	2922.23	3374.59	2935.87
BC005484	0.0357221	0.295076	2.3198	down	BC005484	Fpgs	AA408187	Mus musculus folylpolyglutamyl synthetase, mRNA (cDNA clone MGC:7296 IMAGE:3485401), complete cds.	14287	chr2	32538134	32549638	GO:0006730(one-carbon compound metabolic process);GO:0009396(folic acid and derivative biosynthetic process)	GO:0005615(extracellular space);GO:0005739(mitochondrion)	GO:0000166(nucleotide binding);GO:0004326(tetrahydrofolylpolyglutamate synthase activity);GO:0005524(ATP binding);GO:0016874(ligase activity)	Mm.3830	TC1610023	ENSMUST00000028148	417.668	925.985	526.097	486.395	240.513	932.062	1088.78	757.112
BC005486	0.000644776	0.094791	2.22249	down	BC005486	Ets2	AU022856,Ets-2	Mus musculus E26 avian leukemia oncogene 2, 3' domain, mRNA (cDNA clone MGC:7318 IMAGE:3486021), complete cds.	23872	chr16	95924092	95942656	GO:0000074(regulation of progression through cell cycle);GO:0006355(regulation of transcription, DNA-dependent);GO:0009987(cellular process)	GO:0005622(intracellular);GO:0005634(nucleus)	GO:0003677(DNA binding);GO:0003700(transcription factor activity)	Mm.290207	NP1220302		1412.37	3127.14	1290.4	1622.89	1323.8	3068.11	2944.5	3368.81
BC005520	0.0111768	0.204327	2.13847	down	BC005520	Ehf	9030625L19Rik,AU019492	Mus musculus ets homologous factor, mRNA (cDNA clone MGC:7616 IMAGE:3494644), complete cds.	13661	chr2	103103589	103143353	GO:0006350(transcription);GO:0006355(regulation of transcription, DNA-dependent);GO:0030855(epithelial cell differentiation);GO:0045893(positive regulation of transcription, DNA-dependent)	GO:0005634(nucleus)	GO:0003677(DNA binding);GO:0003700(transcription factor activity);GO:0005515(protein binding)	Mm.10724	TC1603302///TC1578507	ENSMUST00000090475	175.373	365.948	223.405	176.064	126.651	391.138	370.87	335.837
BC005646	0.0390033	0.304386	2.08795	down	BC005646	Nudcd2	2700047N05Rik,D11Ertd603e	Mus musculus NudC domain containing 2, mRNA (cDNA clone MGC:12088 IMAGE:3708975), complete cds.	52653	chr11	40547401	40553448		GO:0005622(intracellular)		Mm.276504	TC1775693	ENSMUST00000020578	366.348	776.513	306.682	482.142	310.221	1079.95	563.636	685.948
BC005720	0.00165265	0.113442	2.57322	down	BC005720	Sgk1	Sgk	Mus musculus serum/glucocorticoid regulated kinase, mRNA (cDNA clone MGC:11778 IMAGE:3594892), complete cds.	20393	chr10	21714510	21719699	GO:0006468(protein amino acid phosphorylation);GO:0006915(apoptosis);GO:0006974(response to DNA damage stimulus)	GO:0005634(nucleus);GO:0005783(endoplasmic reticulum)	GO:0000166(nucleotide binding);GO:0004672(protein kinase activity);GO:0004674(protein serine/threonine kinase activity);GO:0005515(protein binding);GO:0005524(ATP binding);GO:0016301(kinase activity);GO:0016740(transferase activity)	Mm.28405	TC1609075///TC1585076	ENSMUST00000020145	413.569	1054.22	396.646	502.039	342.022	1159.32	952.943	1050.4
BC006789	0.000111047	0.0713968	3.16029	down	BC006789	Ehf	9030625L19Rik,AU019492	Mus musculus ets homologous factor, mRNA (cDNA clone MGC:8140 IMAGE:3589528), complete cds.	13661	chr2	103103589	103143333	GO:0006350(transcription);GO:0006355(regulation of transcription, DNA-dependent);GO:0030855(epithelial cell differentiation);GO:0045893(positive regulation of transcription, DNA-dependent)	GO:0005634(nucleus)	GO:0003677(DNA binding);GO:0003700(transcription factor activity);GO:0005515(protein binding)	Mm.10724	TC1603302///TC1578507	ENSMUST00000090475	518.949	1631.07	591.837	507.749	457.261	1639.69	1662.4	1591.11
BC006904	0.00173071	0.115436	4.18417	down	BC006904	Ltf	Csp82,Lf,MMS10R,Ms10r	Mus musculus lactotransferrin, mRNA (cDNA clone MGC:11944 IMAGE:3600033), complete cds.	17002	chr9	110921812	110944817	GO:0006810(transport);GO:0006811(ion transport);GO:0006826(iron ion transport);GO:0006879(iron ion homeostasis)	GO:0005576(extracellular region);GO:0005615(extracellular space)	GO:0004252(serine-type endopeptidase activity);GO:0005506(iron ion binding);GO:0008199(ferric iron binding);GO:0008233(peptidase activity);GO:0016787(hydrolase activity);GO:0046872(metal ion binding)	Mm.282359	TC1712837///TC1731671	ENSMUST00000035077	102.987	429.696	84.0812	132.65	92.2299	331.277	435.489	522.322
BC006950	0.00148019	0.108613	2.87301	down	BC006950	Ier3	AI663993,IEX-1,cI-3,gly96	Mus musculus immediate early response 3, mRNA (cDNA clone MGC:6933 IMAGE:2811734), complete cds.	15937	chr17	35958657	35959856		GO:0016020(membrane);GO:0016021(integral to membrane)		Mm.25613	TC1771440	ENSMUST00000003635	401.846	1153.88	329.46	416.594	459.484	1044.72	1038.61	1378.3
BC006967	0.000504576	0.0892687	4.58822	down	BC006967	Dusp1	3CH134,Ptpn16,U19515,erp,mkp-1	Mus musculus dual specificity phosphatase 1, mRNA (cDNA clone MGC:6265 IMAGE:3589849), complete cds.	19252	chr17	26642535	26645404	GO:0006470(protein amino acid dephosphorylation);GO:0007049(cell cycle);GO:0016311(dephosphorylation)		GO:0004721(phosphoprotein phosphatase activity);GO:0004725(protein tyrosine phosphatase activity);GO:0005515(protein binding);GO:0008138(protein tyrosine/serine/threonine phosphatase activity);GO:0016787(hydrolase activity);GO:0016791(phosphoric monoester hydrolase activity);GO:0017017(MAP kinase phosphatase activity)	Mm.239041	TC1574874	ENSMUST00000025025	628.508	2841.13	695.766	720.315	469.442	2946.18	3039.62	2537.6
BC009002	0.00368426	0.142306	2.51631	down	BC009002	Rnd3	2610017M01Rik,AI661404,Arhe,Rhoe	Mus musculus Rho family GTPase 3, mRNA (cDNA clone MGC:6381 IMAGE:3500586), complete cds.	74194	chr2	50986899	51004605	GO:0007015(actin filament organization);GO:0007155(cell adhesion);GO:0007264(small GTPase mediated signal transduction)	GO:0005622(intracellular);GO:0016020(membrane)	GO:0000166(nucleotide binding);GO:0003924(GTPase activity);GO:0005525(GTP binding)	Mm.46497	TC1575622///TC1624021///TC1651925	ENSMUST00000017288	161.384	399.409	206.817	129.2	148.137	355.528	409.252	433.448
BC009023	0.00984075	0.196835	2.80533	down	BC009023	Ptger4	EP4,Ptgerep4	Mus musculus prostaglandin E receptor 4 (subtype EP4), mRNA (cDNA clone MGC:7183 IMAGE:3481696), complete cds.	19219	chr15	5183403	5193682	GO:0007165(signal transduction);GO:0007186(G-protein coupled receptor protein signaling pathway);GO:0007189(G-protein signaling, adenylate cyclase activating pathway);GO:0030278(regulation of ossification)	GO:0016020(membrane);GO:0016021(integral to membrane)	GO:0001584(rhodopsin-like receptor activity);GO:0004871(signal transducer activity);GO:0004872(receptor activity);GO:0004930(G-protein coupled receptor activity);GO:0004955(prostaglandin receptor activity);GO:0004957(prostaglandin E receptor activity)	Mm.18509///Mm.406103	TC1578282///TC1610342	ENSMUST00000047379	34.3052	95.296	34.5944	44.0195	24.3016	113.67	71.0425	101.176
BC009805	0.00289974	0.132117	2.75583	down	BC009805	N/A	N/A	Mus musculus glutathione S-transferase, alpha 3, mRNA (cDNA clone MGC:13726 IMAGE:4210324), complete cds.	N/A	chr1	21239831	21255292							176.958	477.135	193.677	209.602	127.594	471.976	500.564	458.865
BC010584	0.0259365	0.2639	2.16279	down	BC010584	Ino80d	7330405I11,A430093A21Rik,BC010584,OTTMUSG00000002594	Mus musculus cDNA sequence BC010584, mRNA (cDNA clone IMAGE:2615857), with apparent retained intron.	227195	chr1	63108609	63160884				Mm.440612	TC1616153		41.7332	90.5365	39.3718	53.7295	32.0984	63.3599	104.154	104.096
BC010675	0.0199564	0.239347	2.94331	down	BC010675	Serpine2	B230326M24Rik,PAI-1,PI7,PN-1,Spi4	Mus musculus serine (or cysteine) peptidase inhibitor, clade E, member 2, mRNA (cDNA clone MGC:11797 IMAGE:3595407), complete cds.	20720	chr1	79791110	79855196	GO:0007275(multicellular organismal development);GO:0007399(nervous system development);GO:0030154(cell differentiation)	GO:0005615(extracellular space)	GO:0004866(endopeptidase inhibitor activity);GO:0004867(serine-type endopeptidase inhibitor activity);GO:0008201(heparin binding)	Mm.3093	NP577421	ENSMUST00000027467	78.1633	219.206	66.9442	118.036	49.5094	274.32	172.525	210.773
BC010758	0.013074	0.211294	2.17184	down	BC010758	Cbr2	MLCR	Mus musculus carbonyl reductase 2, mRNA (cDNA clone MGC:18465 IMAGE:4219349), complete cds.	12409	chr11	120590802	120593295	GO:0006116(NADH oxidation);GO:0008152(metabolic process)	GO:0005739(mitochondrion)	GO:0004090(carbonyl reductase (NADPH) activity);GO:0005515(protein binding);GO:0016491(oxidoreductase activity)	Mm.21454	TC1576455	ENSMUST00000026148	514.393	1124.84	415.574	620.438	507.165	1437.7	890.661	1046.16
BC011089	0.00375062	0.144029	4.17361	down	BC011089	Cyp2f2	Cyp2f	Mus musculus cytochrome P450, family 2, subfamily f, polypeptide 2, mRNA (cDNA clone MGC:11546 IMAGE:3968809), complete cds.	13107	chr7	27905002	27918679	GO:0006118(electron transport)	GO:0005615(extracellular space);GO:0005783(endoplasmic reticulum);GO:0005792(microsome);GO:0016020(membrane)	GO:0004497(monooxygenase activity);GO:0005506(iron ion binding);GO:0016491(oxidoreductase activity);GO:0016712(oxidoreductase activity, acting on paired donors, with incorporation or reduction of molecular oxygen, reduced flavin or flavoprotein as one donor, and incorporation of one atom of oxygen);GO:0020037(heme binding);GO:0046872(metal ion binding)	Mm.4515	TC1572625	ENSMUST00000003100	99.46	422.001	124.51	97.7396	76.1299	583.1	308.616	374.286
BC011221	0.000778951	0.098334	2.16257	down	BC011221	N/A	N/A	Mus musculus cDNA clone IMAGE:4019160, **** WARNING: chimeric clone ****.	N/A	chr7	82993267	83019017							687.748	1479.73	615.352	795.215	652.676	1528.89	1386.27	1524.04
BC011473	2.10308e-05	0.0586483	9.82937	down	BC011473	Ren2	Ren,Ren-2,Ren-B,Rn-2,Rnr	Mus musculus renin 2 tandem duplication of Ren1, mRNA (cDNA clone MGC:18521 IMAGE:4165191), complete cds.	19702	chr1	135247268	135256896	GO:0006508(proteolysis)		GO:0004190(aspartic-type endopeptidase activity);GO:0004194(pepsin A activity);GO:0004195(renin activity);GO:0008233(peptidase activity);GO:0016787(hydrolase activity)	Mm.220955			61.1237	596.473	72.7342	56.2842	54.3527	566.549	581.905	640.965
BC012677	0.00649719	0.172452	2.17472	down	BC012677	Sult5a1	Sult-x1,Sultx1	Mus musculus sulfotransferase family 5A, member 1, mRNA (cDNA clone MGC:13878 IMAGE:4187578), complete cds.	57429	chr8	125666742	125682165			GO:0008146(sulfotransferase activity);GO:0016740(transferase activity)	Mm.6562	TC1585438	ENSMUST00000000755	138.197	296.024	168.226	141.339	105.027	305.802	263.365	318.906
BC012706	0.0180558	0.230748	3.03664	down	BC012706	Pon1	Pon	Mus musculus paraoxonase 1, mRNA (cDNA clone MGC:13984 IMAGE:4158951), complete cds.	18979	chr6	5118102	5143808	GO:0008015(circulation);GO:0008203(cholesterol metabolic process);GO:0009636(response to toxin)	GO:0005576(extracellular region);GO:0005615(extracellular space)	GO:0004063(aryldialkylphosphatase activity);GO:0004064(arylesterase activity);GO:0005319(lipid transporter activity);GO:0008035(high-density lipoprotein binding);GO:0016787(hydrolase activity)	Mm.237657	TC1580023	ENSMUST00000002663	40.6782	132.847	44.9878	41.4487	35.5981	119.596	202.008	76.9358
BC012961	0.0202865	0.240745	2.04483	down	BC012961	Pygm	AI115133	Mus musculus muscle glycogen phosphorylase, mRNA (cDNA clone MGC:13713 IMAGE:3989941), complete cds.	19309	chr19	6384432	6398450	GO:0005975(carbohydrate metabolic process);GO:0005977(glycogen metabolic process);GO:0005980(glycogen catabolic process)		GO:0000166(nucleotide binding);GO:0003824(catalytic activity);GO:0004645(phosphorylase activity);GO:0008184(glycogen phosphorylase activity);GO:0016740(transferase activity);GO:0016757(transferase activity, transferring glycosyl groups);GO:0030170(pyridoxal phosphate binding)	Mm.27806	TC1657336	ENSMUST00000035269	124.772	247.627	167.512	117.567	89.2359	268.091	219.854	254.934
BC013482	0.0384925	0.303321	3.81377	down	BC013482	Akr1c14	9030611N15Rik,AW557061	Mus musculus aldo-keto reductase family 1, member C14, mRNA (cDNA clone MGC:18906 IMAGE:4240772), complete cds.	105387	chr13	4058836	4089668			GO:0016491(oxidoreductase activity);GO:0047042(3-alpha-hydroxysteroid dehydrogenase (B-specific) activity)	Mm.26838	TC1580904	ENSMUST00000041768	84.6559	294.8	39.1686	144.662	70.137	287.86	186.989	409.55
BC013673	0.00932179	0.194305	3.24003	down	BC013673	Pvr	3830421F03Rik,CD155,D7Ertd458e,HVED,PVS,Taa1,Tage4,mE4,necl-5	Mus musculus poliovirus receptor, mRNA (cDNA clone MGC:18785 IMAGE:4188634), complete cds.	52118	chr7	20488926	20506449	GO:0016337(cell-cell adhesion);GO:0016477(cell migration)	GO:0005575(cellular_component)	GO:0004872(receptor activity);GO:0005515(protein binding)	Mm.227506	TC1576466///TC1602216///TC1756958	ENSMUST00000043517	109.196	334.347	133.662	131.345	62.5803	339.764	332.638	330.638
BC013718	0.00210064	0.124311	2.54332	down	BC013718	Ddit3	CHOP-10,CHOP10,chop,gadd153	Mus musculus DNA-damage inducible transcript 3, mRNA (cDNA clone MGC:18641 IMAGE:4012433), complete cds.	13198	chr10	126727865	126733342	GO:0006350(transcription);GO:0006355(regulation of transcription, DNA-dependent);GO:0006983(ER overload response);GO:0007049(cell cycle);GO:0007050(cell cycle arrest);GO:0030503(regulation of cell redox homeostasis);GO:0030968(unfolded protein response);GO:0042789(mRNA transcription from RNA polymerase II promoter);GO:0042981(regulation of apoptosis)	GO:0005634(nucleus)	GO:0003677(DNA binding);GO:0003700(transcription factor activity);GO:0046983(protein dimerization activity)	Mm.110220	TC1579825	ENSMUST00000026475	139.005	357.823	145.241	147.248	124.525	445.857	328.25	299.364
BC013751	0.0148903	0.218873	3.84629	down	BC013751	Alox12e	8-LOX,AW259591,Alox12-ps1,Alox12-ps2,Aloxe,e-LOX1	Mus musculus arachidonate lipoxygenase, epidermal, mRNA (cDNA clone MGC:11467 IMAGE:3596809), complete cds.	11685	chr11	70129112	70136000	GO:0006118(electron transport);GO:0006691(leukotriene metabolic process);GO:0019370(leukotriene biosynthetic process)		GO:0004052(arachidonate 12-lipoxygenase activity);GO:0005506(iron ion binding);GO:0016165(lipoxygenase activity);GO:0016491(oxidoreductase activity);GO:0016702(oxidoreductase activity, acting on single donors with incorporation of molecular oxygen, incorporation of two atoms of oxygen);GO:0046872(metal ion binding)	Mm.274093	NP047869	ENSMUST00000019051	50.6735	200.529	65.9161	33.12	52.9843	176.465	123.774	301.348
BC013783	0.00798181	0.185257	3.92512	down	BC013783	Slc28a3	Cnt3	Mus musculus solute carrier family 28 (sodium-coupled nucleoside transporter), member 3, mRNA (cDNA clone MGC:11959 IMAGE:3600786), complete cds.	114304	chr13	58654668	58712229	GO:0006605(protein targeting);GO:0006810(transport);GO:0015860(purine nucleoside transport);GO:0015864(pyrimidine nucleoside transport)	GO:0005887(integral to plasma membrane);GO:0016020(membrane)	GO:0001882(nucleoside binding);GO:0005415(nucleoside:sodium symporter activity);GO:0015389(pyrimidine- and adenine-specific:sodium symporter activity);GO:0015390(purine-specific nucleoside:sodium symporter activity)	Mm.18188	TC1579677	ENSMUST00000022036	206.468	758.603	261.113	246.931	111.36	823.507	720.195	732.106
BC014802	0.000321082	0.089091	2.08641	down	BC014802	Ak1	Ak-1,B430205N08Rik	Mus musculus adenylate kinase 1, mRNA (cDNA clone MGC:25242 IMAGE:4505142), complete cds.	11636	chr2	32480956	32490572	GO:0006139(nucleobase, nucleoside, nucleotide and nucleic acid metabolic process);GO:0007050(cell cycle arrest);GO:0046034(ATP metabolic process)	GO:0005737(cytoplasm);GO:0005739(mitochondrion);GO:0005886(plasma membrane)	GO:0000166(nucleotide binding);GO:0004017(adenylate kinase activity);GO:0005524(ATP binding);GO:0016301(kinase activity);GO:0016740(transferase activity);GO:0019201(nucleotide kinase activity)	Mm.29189	TC1574279	ENSMUST00000068271	78.5657	163.626	74.4156	87.2466	74.035	156.506	174.737	159.636
BC014804	0.000238681	0.0869975	2.84169	down	BC014804	Rorc	Nr1f3,RORgamma,TOR,Thor	Mus musculus RAR-related orphan receptor gamma, mRNA (cDNA clone MGC:25220 IMAGE:4489193), complete cds.	19885	chr3	94176772	94201568	GO:0006350(transcription);GO:0006355(regulation of transcription, DNA-dependent);GO:0006468(protein amino acid phosphorylation);GO:0030154(cell differentiation);GO:0048535(lymph node development)	GO:0005634(nucleus)	GO:0003677(DNA binding);GO:0003700(transcription factor activity);GO:0003707(steroid hormone receptor activity);GO:0004872(receptor activity);GO:0004879(ligand-dependent nuclear receptor activity);GO:0008270(zinc ion binding);GO:0046872(metal ion binding)	Mm.4372	TC1582154	ENSMUST00000029795	369.579	1048.21	419.751	350.46	338.527	1023.16	1151.76	969.721
BC014822	0.000402917	0.089091	3.16943	down	BC014822	Ephb3	AW456895,Cek10,Etk2,HEK2,MDK5,Sek4,Tyro6	Mus musculus Eph receptor B3, mRNA (cDNA clone MGC:18409 IMAGE:3673003), complete cds.	13845	chr16	21204866	21223377	GO:0006468(protein amino acid phosphorylation);GO:0007169(transmembrane receptor protein tyrosine kinase signaling pathway);GO:0007411(axon guidance)	GO:0005615(extracellular space);GO:0005887(integral to plasma membrane);GO:0016020(membrane);GO:0016021(integral to membrane)	GO:0000166(nucleotide binding);GO:0004672(protein kinase activity);GO:0004713(protein-tyrosine kinase activity);GO:0004872(receptor activity);GO:0005003(ephrin receptor activity);GO:0005005(transmembrane-ephrin receptor activity);GO:0005524(ATP binding);GO:0008046(axon guidance receptor activity);GO:0016301(kinase activity);GO:0016740(transferase activity)	Mm.6972	TC1581257	ENSMUST00000006112	1714.25	5472.88	1726.95	1842.51	1573.3	4988.28	4871.47	6558.9
BC015076	0.000161906	0.0761812	2.74953	down	BC015076	Mpzl2	Eva,Eva1	Mus musculus myelin protein zero-like 2, mRNA (cDNA clone MGC:13828 IMAGE:4188907), complete cds.	14012	chr9	44850639	44862094	GO:0007155(cell adhesion)	GO:0005615(extracellular space);GO:0016020(membrane);GO:0016021(integral to membrane)	GO:0005515(protein binding)	Mm.33240	TC1575926	ENSMUST00000034600	1531.65	4205.01	1386.35	1697.52	1511.07	4216.3	3877.99	4520.73
BC015086	0.00460229	0.155894	2.02256	down	BC015086	Glul	GS,Glns	Mus musculus glutamate-ammonia ligase (glutamine synthetase), mRNA (cDNA clone MGC:14045 IMAGE:4224865), complete cds.	14645	chr1	155747085	155755414	GO:0006542(glutamine biosynthetic process);GO:0006807(nitrogen compound metabolic process)	GO:0005739(mitochondrion)	GO:0004356(glutamate-ammonia ligase activity);GO:0016874(ligase activity)	Mm.210745	TC1687691///TC1573428	ENSMUST00000102516	1459.41	2951.98	1715.88	1367.9	1294.45	2923.27	3413.44	2519.23
BC015256	0.000129067	0.0713968	2.23037	down	BC015256	Fzd4	Fz4	Mus musculus frizzled homolog 4 (Drosophila), mRNA (cDNA clone MGC:18403 IMAGE:4238940), complete cds.	14366	chr7	96552875	96557913	GO:0007165(signal transduction);GO:0007166(cell surface receptor linked signal transduction);GO:0007186(G-protein coupled receptor protein signaling pathway);GO:0007275(multicellular organismal development);GO:0016055(Wnt receptor signaling pathway)	GO:0005615(extracellular space);GO:0016020(membrane);GO:0016021(integral to membrane)	GO:0004871(signal transducer activity);GO:0004872(receptor activity);GO:0004926(non-G-protein coupled 7TM receptor activity);GO:0004930(G-protein coupled receptor activity);GO:0005515(protein binding)	Mm.387968	TC1581042	ENSMUST00000058755	1381.34	3088.73	1424.16	1348.89	1370.98	2844.42	3019.42	3402.35
BC016884	0.00360861	0.140855	4.94831	down	BC016884	Frzb	Frp,Sfrp3,frezzled,fritz,frzb-1	Mus musculus frizzled-related protein, mRNA (cDNA clone MGC:18388 IMAGE:4237554), complete cds.	20378	chr2	80252124	80287400	GO:0007275(multicellular organismal development);GO:0016055(Wnt receptor signaling pathway);GO:0030154(cell differentiation);GO:0030178(negative regulation of Wnt receptor signaling pathway)	GO:0005576(extracellular region);GO:0005615(extracellular space)	GO:0017147(Wnt-protein binding)	Mm.427436	TC1576425	ENSMUST00000028389	49.4351	247.232	54.2363	59.6066	34.4624	318.076	162.574	261.047
BC017550	0.0242638	0.258086	2.129	down	BC017550	Rab30	5033421K01Rik,AI323892,Rsb30	Mus musculus RAB30, member RAS oncogene family, mRNA (cDNA clone MGC:28980 IMAGE:4503909), complete cds.	75985	chr7	99890223	99985627	GO:0006886(intracellular protein transport);GO:0007264(small GTPase mediated signal transduction);GO:0015031(protein transport)	GO:0016020(membrane)	GO:0000166(nucleotide binding);GO:0005525(GTP binding)	Mm.389966	TC1581625	ENSMUST00000032879	50.4767	111.62	52.8678	52.9902	45.5722	140.111	123.62	71.13
BC017628	0.00717195	0.17761	2.22195	down	BC017628	Qtrtd1	3110012M05Rik,4930470H18Rik,AI648807,MGC102598	Mus musculus queuine tRNA-ribosyltransferase domain containing 1, mRNA (cDNA clone IMAGE:4505816), with apparent retained intron.	106248	chr16	43861525	43889789	GO:0008616(queuosine biosynthetic process)		GO:0008479(queuine tRNA-ribosyltransferase activity);GO:0016740(transferase activity)	Mm.275354	TC1578126	ENSMUST00000023387	113.636	254.181	117.178	93.5654	130.165	320.319	225.267	216.958
BC017649	0.00316143	0.134053	2.04976	down	BC017649	E130308A19Rik	MGC47072	Mus musculus RIKEN cDNA E130308A19 gene, mRNA (cDNA clone MGC:28996 IMAGE:4924105), complete cds.	230259	chr4	59639315	59766175				Mm.45688	TC1580421///TC1585957	ENSMUST00000070150///ENSMUST00000052420	530.962	1090.01	455.807	549.439	587.64	1278.38	1011.56	980.091
BC018182	0.00100719	0.0994854	3.39757	down	BC018182	Prodh2	2510028N04Rik,2510038B11Rik,MmPOX,MmPOX1,POX1	Mus musculus proline dehydrogenase (oxidase) 2, mRNA (cDNA clone MGC:25812 IMAGE:4161894), complete cds.	56189	chr7	31278690	31298059	GO:0006537(glutamate biosynthetic process);GO:0006562(proline catabolic process)	GO:0005743(mitochondrial inner membrane)	GO:0004657(proline dehydrogenase activity)	Mm.270525	TC1583295///TC1596301	ENSMUST00000058280	46.412	156.502	49.3386	36.2653	53.6322	178.47	136.196	154.839
BC019412	0.000923729	0.0994854	3.08215	down	BC019412	Azin1	1700085L02Rik,AI414949,Oazi,Oazin	Mus musculus antizyme inhibitor 1, mRNA (cDNA clone MGC:30222 IMAGE:5151406), complete cds.	54375	chr15	38419548	38449009	GO:0006595(polyamine metabolic process);GO:0006596(polyamine biosynthetic process)		GO:0003824(catalytic activity)	Mm.250214	TC1573494///TC1578599	ENSMUST00000065308	1523.03	4638.74	1897.52	1369.54	1302.03	4340.4	5102.7	4473.14
BC019443	0.00307976	0.133822	2.23286	down	BC019443	Sgms1	9530058O11Rik,AI841905,C80702,MGC30540,MOB,SMS1,SMS1alpha1,SMS1alpha2,SMS1beta,SMS1gamma,Sor1,Tmem23	Mus musculus sphingomyelin synthase 1, mRNA (cDNA clone MGC:30540 IMAGE:5041121), complete cds.	208449	chr19	32198257	32285470	GO:0006629(lipid metabolic process);GO:0006665(sphingolipid metabolic process);GO:0006686(sphingomyelin biosynthetic process);GO:0043066(negative regulation of apoptosis)	GO:0000138(Golgi trans cisterna);GO:0016020(membrane);GO:0016021(integral to membrane);GO:0030173(integral to Golgi membrane)	GO:0016301(kinase activity);GO:0016740(transferase activity);GO:0047493(ceramide cholinephosphotransferase activity)	Mm.329810	TC1704565///TC1576686	ENSMUST00000099514///ENSMUST00000087384	922.477	2092.47	906.201	955.213	906.016	1835.33	2640.62	1801.46
BC019483	0.0150833	0.219441	2.19176	down	BC019483	Cth	0610010I13Rik,AI314617,BC019483,Cys3,MGC28655	Mus musculus cystathionase (cystathionine gamma-lyase), mRNA (cDNA clone MGC:28655 IMAGE:4235178), complete cds.	107869	chr3	157557386	157588013	GO:0006520(amino acid metabolic process);GO:0008652(amino acid biosynthetic process);GO:0019344(cysteine biosynthetic process)	GO:0005575(cellular_component)	GO:0004123(cystathionine gamma-lyase activity);GO:0016829(lyase activity);GO:0030170(pyridoxal phosphate binding)	Mm.28301	TC1578221		97.7311	208.203	135.101	79.6432	78.4488	191.471	238.616	194.522
BC019496	0.00769257	0.182932	2.04234	down	BC019496	Agt	AI265500,AngII,Aogen,Serpina8	Mus musculus angiotensinogen (serpin peptidase inhibitor, clade A, member 8), mRNA (cDNA clone MGC:28582 IMAGE:4211501), complete cds.	11606	chr8	127080486	127088483	GO:0001543(ovarian follicle rupture);GO:0001568(blood vessel development);GO:0001658(ureteric bud branching);GO:0001822(kidney development);GO:0007160(cell-matrix adhesion);GO:0008065(establishment of blood-nerve barrier);GO:0008217(blood pressure regulation);GO:0008285(negative regulation of cell proliferation);GO:0009409(response to cold);GO:0030198(extracellular matrix organization and biogene…	GO:0005615(extracellular space)	GO:0004867(serine-type endopeptidase inhibitor activity)	Mm.301626	TC1576097	ENSMUST00000063278	140.271	285.662	129.319	171.377	120.116	268.025	248.564	340.396
BC019511	3.49457e-05	0.060921	3.2166	down	BC019511	Mthfd2	AW558851,NMDMC	Mus musculus methylenetetrahydrofolate dehydrogenase (NAD+ dependent), methenyltetrahydrofolate cyclohydrolase, mRNA (cDNA clone MGC:28481 IMAGE:4164253), complete cds.	17768	chr6	83255685	83267585	GO:0006730(one-carbon compound metabolic process);GO:0009396(folic acid and derivative biosynthetic process)	GO:0005615(extracellular space);GO:0005739(mitochondrion)	GO:0000287(magnesium ion binding);GO:0003824(catalytic activity);GO:0004477(methenyltetrahydrofolate cyclohydrolase activity);GO:0004487(methylenetetrahydrofolate dehydrogenase (NAD+) activity);GO:0004488(methylenetetrahydrofolate dehydrogenase (NADP+) activity);GO:0016491(oxidoreductase activity);GO:0016787(hydrolase activity)	Mm.443	TC1572912	ENSMUST00000005810	1113.07	3585.14	1045.12	1137.19	1156.91	3597.7	3280.58	3877.15
BC019745	0.0013364	0.106884	2.1318	down	BC019745	Tmem2	3110012M15Rik,MGC102198,mKIAA1412	Mus musculus transmembrane protein 2, mRNA (cDNA clone MGC:30634 IMAGE:3675225), complete cds.	83921	chr19	21886754	21930870	GO:0008150(biological_process)	GO:0005575(cellular_component);GO:0016021(integral to membrane)	GO:0003674(molecular_function)	Mm.329776	TC1720844	ENSMUST00000096194	57.4471	123.105	62.3827	55.4523	54.5062	128.395	137.293	103.626
BC020008	0.0489909	0.331114	2.08335	down	BC020008	Sdpr	-	Mus musculus serum deprivation response, mRNA (cDNA clone MGC:25726 IMAGE:3980310), complete cds.	20324	chr1	51346126	51359791		GO:0005829(cytosol)	GO:0001786(phosphatidylserine binding);GO:0005515(protein binding);GO:0008289(lipid binding)	Mm.398690	TC1575185	ENSMUST00000051572	84.0471	172.662	118.567	60.711	72.8637	206.968	119.903	191.114
BC020081	0.00638303	0.17145	2.39439	down	BC020081	2310016C08Rik	AW049004,MGC103106	Mus musculus RIKEN cDNA 2310016C08 gene, mRNA (cDNA clone MGC:28354 IMAGE:4018622), complete cds.	69573	chr6	29224378	29225361		GO:0005923(tight junction);GO:0016020(membrane);GO:0016021(integral to membrane)	GO:0005198(structural molecule activity)	Mm.45161	TC1595444///TC1578855	ENSMUST00000054445	167.654	396.634	212.572	159.509	130.881	397.128	457.401	335.372
BC021625	0.0126368	0.210307	2.82148	down	BC021625	Cln8	mnd	Mus musculus ceroid-lipofuscinosis, neuronal 8, mRNA (cDNA clone MGC:13730 IMAGE:4188527), complete cds.	26889	chr8	14889080	14897939	GO:0001306(age-dependent response to oxidative stress);GO:0006644(phospholipid metabolic process);GO:0006672(ceramide metabolic process);GO:0007006(mitochondrial membrane organization and biogenesis);GO:0007040(lysosome organization and biogenesis);GO:0007399(nervous system development);GO:0007601(visual perception);GO:0007628(adult walking behavior);GO:0008203(cholesterol metabolic process);GO:0…	GO:0005783(endoplasmic reticulum);GO:0005793(ER-Golgi intermediate compartment);GO:0016020(membrane);GO:0016021(integral to membrane)		Mm.254027	TC1572729///TC1661253///TC1653975	ENSMUST00000027554	72.8143	195.867	47.1846	104.413	66.8454	169.427	216.696	201.476
BC022174	0.00172962	0.115436	3.15744	down	BC022174	Cry1	AU020726,AU021000,Phll1	Mus musculus cryptochrome 1 (photolyase-like), mRNA (cDNA clone MGC:13933 IMAGE:4036758), complete cds.	12952	chr10	84594444	84647566	GO:0006281(DNA repair);GO:0006350(transcription);GO:0006355(regulation of transcription, DNA-dependent);GO:0007623(circadian rhythm);GO:0018298(protein-chromophore linkage);GO:0048511(rhythmic process);GO:0050896(response to stimulus)	GO:0005634(nucleus)	GO:0000166(nucleotide binding);GO:0003913(DNA photolyase activity);GO:0004872(receptor activity);GO:0005515(protein binding)	Mm.26237	TC1577572	ENSMUST00000020227	491.204	1515.09	371.839	631.875	469.898	1554.39	1471.99	1518.9
BC023001	0.0116828	0.206505	2.43523	down	BC023001	Rgs2	GOS8	Mus musculus regulator of G-protein signaling 2, mRNA (cDNA clone MGC:36187 IMAGE:5365271), complete cds.	19735	chr1	145848119	145851262	GO:0007049(cell cycle);GO:0007169(transmembrane receptor protein tyrosine kinase signaling pathway);GO:0007186(G-protein coupled receptor protein signaling pathway);GO:0009968(negative regulation of signal transduction)	GO:0005634(nucleus)	GO:0004871(signal transducer activity);GO:0005096(GTPase activator activity)	Mm.28262	TC1574514	ENSMUST00000027606	600.425	1410.62	820.223	564.408	416.646	1543.03	1391.15	1297.67
BC023815	0.000820154	0.0994854	6.67252	down	BC023815	Gadd45b	AI323528,Myd118	Mus musculus growth arrest and DNA-damage-inducible 45 beta, mRNA (cDNA clone MGC:36156 IMAGE:5355150), complete cds.	17873	chr10	80392834	80394949	GO:0000074(regulation of progression through cell cycle);GO:0000186(activation of MAPKK activity);GO:0006469(negative regulation of protein kinase activity);GO:0006915(apoptosis);GO:0007275(multicellular organismal development);GO:0030154(cell differentiation)	GO:0005634(nucleus)	GO:0005515(protein binding)	Mm.1360	TC1579606	ENSMUST00000015456	816.981	5491.97	861.651	970.913	618.38	5561.93	3991.79	6922.17
BC024846	0.0281816	0.272129	2.32144	down	BC024846	Fkbp14	BC029109,FKBP22,MGC18737	Mus musculus FK506 binding protein 14, mRNA (cDNA clone IMAGE:5361022), with apparent retained intron.	231997	chr6	54527598	54543122	GO:0006457(protein folding)	GO:0005783(endoplasmic reticulum)	GO:0003755(peptidyl-prolyl cis-trans isomerase activity);GO:0005509(calcium ion binding);GO:0016853(isomerase activity)	Mm.274693	TC1606334	ENSMUST00000046520	56.9136	128.666	73.9639	60.6811	36.0958	99.685	130.418	155.897
BC024988	0.00167452	0.113442	3.86235	down	BC024988	Galntl4	2900011G21Rik,BC024988,MGC32465	Mus musculus UDP-N-acetyl-alpha-D-galactosamine:polypeptide N-acetylgalactosaminyltransferase-like 4, mRNA (cDNA clone MGC:32465 IMAGE:5044626), complete cds.	233733	chr7	118615174	118923491		GO:0016020(membrane);GO:0016021(integral to membrane)	GO:0004653(polypeptide N-acetylgalactosaminyltransferase activity);GO:0005509(calcium ion binding);GO:0005529(sugar binding);GO:0016740(transferase activity);GO:0016757(transferase activity, transferring glycosyl groups);GO:0030145(manganese ion binding)	Mm.323322	TC1594474///TC1601543	ENSMUST00000049430	60.4418	233.948	72.676	47.6055	61.0439	285.423	181.423	234.998
[truncated: 223 more rows]

## Sheet: Ro60_316-335 vs PBS control
	P-value		Fold change and Regulation		Annotations														Group--Normalized Intensity		Individual Normalized Intensity
[truncated: 628 more rows]

## Sheet: PBS control vs untreated
	P-value		Fold change and Regulation		Annotations														Group--Normalized Intensity		Individual Normalized Intensity
[truncated: 801 more rows]
